# Supplementary material for: Integrated Transcriptomic, Metabolomic, and Physiological Analyses Reveal New Insights into Fragrance Formation in the Heartwood of Phoebe hui
Source: Int J Mol Sci. 2022 Nov 14;23(22):14044. doi: 10.3390/ijms232214044 (PMC9698381; doi:10.3390/ijms232214044)
Supplement: Supplementary file 1 [file ijms-23-14044-s001.zip › supplementary tables.xlsx]

## Sheet: table s1
Table S1. Primers for RT-qPCR
Gene ID	Gene names	Primer sequences (5'-3')	Notes
Maker00025698	XYL4	TGAGCCAACACACAGAAGCA	Forward
		AGTCGCATCAGCACCATGAA	Reverse
Maker00024684	glyA, SHMT	CCAGATCGAGAACCTCTGCC	Forward
		CTCCGGAGGTGTAGTACCCA	Reverse
Maker00055840	MAS	GGGTGGACAGCCTAACCAAT	Forward
		AAGAGGACTTTTGGGGGTGC	Reverse
Maker00000759	(-)-alpha-terpineol synthase	TCAAGGTGGTGGAGGGATCT	Forward
		CATCTGTCCACAGCATCGGT	Reverse
Maker00014940	Peroxidase	CCACCATGTAACGGTGGTCA	Forward
		AAGAGGATGATGGACCGGGA	Reverse
Phoebe_bournei_newGene_11548	CAD	TGGAGGCCAATGGCATAGTG	Forward
		GTCCGCGTAACTTTCCTTGC	Reverse
Maker00033335.gene	COMT	ACTCCATCCTCACCTGCTCT	Forward
		CAGAACCAACAGGGGAGCAA	Reverse
Phoebe_bournei_newGene_2299	F5H	GCTCGAGAAGGCGAGGAAAT	Forward
		CCGGCAGATCCATCATCGAA	Reverse
Maker00031067	PGT1	CACGTTGCTGTAGGGGGATT	Forward
		GAGAAGCCTGGACTTGCCAT	Reverse
Maker00027670	ANS	GTCTTTGGGTCTGGGAGTGG	Forward
		GAGGATGAAGGTGAGGGCAC	Reverse
Maker00010133	AP2/ERF-ERF	TTCGGCGGTGCTCAATTTTC	Forward
		AGGGGAGGGGATGTGAACAA	Reverse
Maker00011762	bHLH	TCCTCAACCATGTCCACAGC	Forward
		CTTGCTGCAATCTGCACCTG	Reverse
Maker00050290	C2H2	CCACCAGAACGCTCACAAGA	Forward
		GTGTAAAACAAGGCGGCAGG	Reverse
Maker00005197	GARP-G2-like	GAAGAAGACGACCCCATGCT	Forward
		TCCACCACAATCTCCACTGC	Reverse
Maker00033433	MYB	TCCCTGGGCGGACTGATAAT	Forward
		TTGGAACGCTCCCTAGACCT	Reverse
Maker00003918	MYB-related	AGAGGAGGACGAGGGAAACA	Forward
		GGCAGAAGCACAAGGGACTA	Reverse
Maker00047959	NAC	TTCCATCGACCATCCAAGGC	Forward
		CCCAGGTGGTATTGGTGCAT	Reverse
Maker00049376	OFP	CTACTGCGACAGCACCTACC	Forward
		GGAAGGGCAATTGGTCCTGA	Reverse
Maker00010783	SBP	TTGCACGCGAGTCTGTACTT	Forward
		AACAGAGCACCAACAACGGA	Reverse
Maker00039996	WRKY	TTCACCGAGTGCCTACAAGC	Forward
		GCCTCCGTCGATGATGAAGA	Reverse
internal gene	Actin	GGTGCCCTGAGGTCCTGTT	Forward
		AGGAACCACCGATCCAGACA	Reverse
XYL4: xylan 1,4-beta-xylosidase, glyA, SHMT: glycine hydroxymethyltransferase, MAS: momilactone-A synthase, CAD: cinnamyl-alcohol dehydrogenase, COMT: acffeic acid 3-O-methyltransferase, F5H: ferulate-5-hydroxylase, PGT1: phlorizin synthase, ANS: anthocyanidin synthase

## Sheet: table s2
Table S2. The accumulated metabolites in SW, TZ, and HW of Phoebe hui
Metabolite name	Sub class	Class	Super class	Peak area
				SW	TZ	HW
prop-1-yne	others	others	Acetylides	2784.25	15638.2	10318
phthalic acid	Benzoic acids and derivatives	Benzene and substituted derivatives	Benzenoids	5215	5380.5	4958
ethylbenzene	others	Benzene and substituted derivatives	Benzenoids	2637.25	5116.75	4088.25
2-Ethyltoluene	Toluenes	Benzene and substituted derivatives	Benzenoids	18150.5	159104	101956
3,5-Dimethylphenol	Cresols	Phenols	Benzenoids	5313.75	25434.5	20270.8
2,3-Dihydroxybiphenyl	Biphenols	Benzene and substituted derivatives	Benzenoids	0	62.25	49.5
benzoic acid	Benzoic acids and derivatives	Benzene and substituted derivatives	Benzenoids	1.80603e+06	6.28905e+06	7.28698e+06
Eicosane	Alkanes	Saturated hydrocarbons	Hydrocarbons	3896.75	5438.25	11606.5
dodecane	Alkanes	Saturated hydrocarbons	Hydrocarbons	42127.8	77203	88733.8
Tetradecane	Alkanes	Saturated hydrocarbons	Hydrocarbons	9865	21142.2	26598.8
Methyl Pelargonate	Fatty acid esters	Fatty Acyls	Lipids and lipid-like molecules	690.25	2342.75	1818.75
Limonene	Monoterpenoids	Prenol lipids	Lipids and lipid-like molecules	10983.5	70119	49914.2
P-Cymene	Monoterpenoids	Prenol lipids	Lipids and lipid-like molecules	49596.8	282608	193585
Guaiadiene	Sesquiterpenoids	Prenol lipids	Lipids and lipid-like molecules	75308.8	382842	277248
Methyl Linolenate	Lineolic acids and derivatives	Fatty Acyls	Lipids and lipid-like molecules	32552.8	200784	184948
Humulene	Sesquiterpenoids	Prenol lipids	Lipids and lipid-like molecules	5417.75	45068.8	25304.5
Cubebene	Sesquiterpenoids	Prenol lipids	Lipids and lipid-like molecules	154089	799377	527198
Beta-Myrcene	Monoterpenoids	Prenol lipids	Lipids and lipid-like molecules	69775.5	301291	223582
prop-2-enoic acid	Acrylic acids and derivatives	Carboxylic acids and derivatives	Organic acids and derivatives	4900	47501	35300
2-chloroacetic acid	Alpha-halocarboxylic acids and derivatives	Carboxylic acids and derivatives	Organic acids and derivatives	15066.8	45499.2	37954.2
Acetamide	Carboximidic acids	Carboximidic acids and derivatives	Organic acids and derivatives	43946.5	198153	216164
2,5-Dihydroxyacetophenone	Carbonyl compounds	Organooxygen compounds	Organic oxygen compounds	3661	14427.5	11153.8
2,4-Heptadienal	Carbonyl compounds	Organooxygen compounds	Organic oxygen compounds	11238	8199.25	10042
2-Aminopyridine	Aminopyridines and derivatives	Pyridines and derivatives	Organoheterocyclic compounds	461.25	1038.5	952
Isoxazole	Isoxazoles	Azoles	Organoheterocyclic compounds	63370	422349	247868
1-(furan-2-ylmethyl)pyrrole	Substituted pyrroles	Pyrroles	Organoheterocyclic compounds	9887.75	134477	28482.8
4,4''-Di-Methoxy-3,5,3'',5''-Tetra-Methyl-Terphenyl	others	others	others	0	0	0
diethyl-pentadecoxy-(2-phenylethoxy)silane	others	others	others	378.75	529	511.25
dimethylphosphorylmethane	others	others	others	11799	53849	42248.8
2,7,8-trimethyl-1,2,3,5-tetrahydro-1,5-benzodiazepin-4-one	others	others	others	11799.2	44887	16852.8
1-chlorodecane	others	others	others	11286.5	37483.2	28575.8
4-hydroxy-1H-1,7-naphthyridin-2-one	others	others	others	722936	3.24137e+06	2446959
2-Tert-Butylmercapto-4,5-Lutidine	others	others	others	4018	16945	11579.8
Ortho-Methylanisole	others	others	others	12329.2	63412	46787.8
Isopropyl P-Methoxystyryl Ketone	others	others	others	6270	20778.2	10824.8
1,5-dimethylpyrrole-2-carbonitrile	others	others	others	8392.75	23118.2	30657.8
N-(5-methyl-4,5,6,7-tetrahydrobenzotriazol-1-yl)benzenesulfonamide	others	others	others	47315	264550	171496
Nordihydrohalkendin	others	others	others	442.75	2449	1848.5
1-chloro-2-methylpropan-2-ol	others	others	others	55162	122142	64222.8
(E)-3-(5-amino-2,3-dimethoxyphenyl)prop-2-enenitrile	others	others	others	9205	30156.8	15209.5
Dl-Histidine Monohydrochloride Monohydrate	others	others	others	13400.8	33761	37520
1,1,2,3,4,4-hexafluorobuta-1,3-diene	others	others	others	7536.75	28465.2	20417.5
4,8-dimethylnona-1,7-dien-4-ol	others	others	others	4856.75	24750.2	16019.2
3,6-dimethylhept-6-en-4-yn-3-ol	others	others	others	3570.75	17471.5	11329
(2E)-2-(acetylhydrazinylidene)propanoic acid	others	others	others	2785	3181.75	3275.75
1-(4-hydroxy-4-methyl-7-propan-2-yl-1,2,3,3a,5,6,7,7a-octahydroinden-1-yl)ethanone	others	others	others	27166.2	48245.2	41638
1-Ethyl-3-Phenoxybenzene	others	others	others	605.5	1396	1239.5
Propyl Bromide	others	others	others	16117	16299.8	27322
hex-3-ene	others	others	others	1673.25	2451.75	4376.25

## Sheet: table s3
Table S3. Description of the transcriptome sequencing data dataset and mapping statistics
Sample	Total Reads	Mapped Reads	Uniq Mapped Reads	Multiple Map Reads	Reads Map to '+'	Reads Map to '-'
HW1	41785778	33,996,345 (81.36%)	32,886,358 (78.70%)	1,109,987 (2.66%)	17,840,781 (42.70%)	17,606,391 (42.13%)
HW2	36042050	24,431,200 (67.79%)	23,193,038 (64.35%)	1,238,162 (3.44%)	13,343,062 (37.02%)	13,180,498 (36.57%)
HW3	42335920	36,957,392 (87.30%)	35,772,200 (84.50%)	1,185,192 (2.80%)	19,279,001 (45.54%)	19,140,637 (45.21%)
SW1	40478328	34,034,090 (84.08%)	33,043,207 (81.63%)	990,883 (2.45%)	17,701,379 (43.73%)	17,590,019 (43.46%)
SW2	42492778	35,681,166 (83.97%)	34,596,027 (81.42%)	1,085,139 (2.55%)	18,590,166 (43.75%)	18,466,561 (43.46%)
SW3	38770940	33,300,410 (85.89%)	32,168,007 (82.97%)	1,132,403 (2.92%)	17,422,405 (44.94%)	17,298,543 (44.62%)
TZ1	41863914	36,032,252 (86.07%)	34,981,711 (83.56%)	1,050,541 (2.51%)	18,800,198 (44.91%)	18,569,562 (44.36%)
TZ2	42589160	36,316,613 (85.27%)	35,217,752 (82.69%)	1,098,861 (2.58%)	18,979,107 (44.56%)	18,765,005 (44.06%)
TZ3	48284756	41,487,026 (85.92%)	40,049,217 (82.94%)	1,437,809 (2.98%)	21,739,890 (45.02%)	21,574,005 (44.68%)

## Sheet: table s4
Table S4. List of the annotated novel genes in Phoebe hui wood detected
Gene id	COG class	COG class annotation	GO annotation	KEGG annotation	KOG class	KOG class annotation	Pfam annotation	Swissprot annotation	TrEMBL annotation	eggNOG class	eggNOG class annotation	nr annotation
Phoebe_bournei_newGene_9915	--	--	Cellular Component: integral component of membrane (GO:0016021);;	K22379|1.7e-14|cann:107873214|K22379 E3 ubiquitin-protein ligase RNFT1 [EC:2.3.2.27] | (RefSeq) RING finger and transmembrane domain-containing protein 1-like	--	--	--	--	RING finger and transmembrane domain-containing protein 2-like isoform X1 OS=Capsicum annuum OX=4072 GN=LOC107873214 PE=4 SV=1	--	--	E3 ubiquitin-protein ligase RNFT1-like isoform X1 [Solanum pennellii]
Phoebe_bournei_newGene_10011	[G]	Carbohydrate transport and metabolism	Molecular Function: polygalacturonase activity (GO:0004650);; Biological Process: carbohydrate metabolic process (GO:0005975);;	K01184|2.4e-23|boe:106333397|K01184 polygalacturonase [EC:3.2.1.15] | (RefSeq) probable polygalacturonase At3g15720 isoform X1	--	--	Glycosyl hydrolases family 28	Probable polygalacturonase OS=Vitis vinifera OX=29760 GN=GSVIVT00026920001 PE=1 SV=1	Putative polygalacturonase OS=Cinnamomum micranthum f. kanehirae OX=337451 GN=CKAN_01679500 PE=3 SV=1	G	Carbohydrate transport and metabolism	putative polygalacturonase [Cinnamomum micranthum f. kanehirae]
Phoebe_bournei_newGene_3964	[H]	Coenzyme transport and metabolism	Cellular Component: cytoplasm (GO:0005737);; Cellular Component: cytosol (GO:0005829);; Biological Process: protein modification by small protein conjugation (GO:0032446);; Molecular Function: UFM1 activating enzyme activity (GO:0071566);; Biological Process: protein ufmylation (GO:0071569);;	K12164|2.4e-189|vvi:100266337|K12164 ubiquitin-like modifier-activating enzyme 5 | (RefSeq) ubiquitin-like modifier-activating enzyme 5	[H]	Coenzyme transport and metabolism	ThiF family	Ubiquitin-like modifier-activating enzyme 5 OS=Arabidopsis thaliana OX=3702 GN=At1g05350 PE=3 SV=2	Ubiquitin-like modifier-activating enzyme 5 OS=Vitis vinifera OX=29760 GN=VIT_17s0000g01380 PE=4 SV=1	H	Coenzyme transport and metabolism	PREDICTED: ubiquitin-like modifier-activating enzyme 5 [Vitis vinifera]
Phoebe_bournei_newGene_12157	[C]	Energy production and conversion	Molecular Function: FMN binding (GO:0010181);; Molecular Function: oxidoreductase activity (GO:0016491);;	K05894|5.2e-156|gab:108452044|K05894 12-oxophytodienoic acid reductase [EC:1.3.1.42] | (RefSeq) 12-oxophytodienoate reductase 2-like	[CR]	--	NADH:flavin oxidoreductase / NADH oxidase family	12-oxophytodienoate reductase 1 OS=Solanum lycopersicum OX=4081 GN=OPR1 PE=1 SV=1	12-oxophytodienoate reductase 2-like protein OS=Cinnamomum micranthum f. kanehirae OX=337451 GN=CKAN_00725000 PE=3 SV=1	C	Energy production and conversion	12-oxophytodienoate reductase 2-like protein [Cinnamomum micranthum f. kanehirae]
Phoebe_bournei_newGene_5960	--	--	Biological Process: phosphorelay signal transduction system (GO:0000160);; Molecular Function: DNA binding (GO:0003677);; Cellular Component: nucleus (GO:0005634);;	--	--	--	--	--	Two-component response regulator-like protein APRR2 isoform X1 OS=Cinnamomum micranthum f. kanehirae OX=337451 GN=CKAN_00966200 PE=4 SV=1	--	--	two-component response regulator-like protein APRR2 isoform X1 [Cinnamomum micranthum f. kanehirae]
Phoebe_bournei_newGene_9233	--	--	Molecular Function: protein binding (GO:0005515);;	K03188|4.6e-17|dcr:108224146|K03188 urease accessory protein | (RefSeq) uncharacterized protein LOC108224146 isoform X1	--	--	F-box domain	Putative F-box protein PP2-B2 OS=Arabidopsis thaliana OX=3702 GN=PP2B2 PE=4 SV=2	F-box-like protein OS=Cinnamomum micranthum f. kanehirae OX=337451 GN=CKAN_02599900 PE=4 SV=1	S	Function unknown	F-box-like protein [Cinnamomum micranthum f. kanehirae]
Phoebe_bournei_newGene_8816	--	--	Cellular Component: integral component of membrane (GO:0016021);;	K00889|6.5e-14|dcr:108218789|K00889 1-phosphatidylinositol-4-phosphate 5-kinase [EC:2.7.1.68] | (RefSeq) phosphatidylinositol 4-phosphate 5-kinase 6-like	[R]	General function prediction only	Domain of unknown function	--	Protein ACCELERATED CELL DEATH 6-like protein isoform X2 OS=Cinnamomum micranthum f. kanehirae OX=337451 GN=CKAN_01400400 PE=4 SV=1	L	Replication, recombination and repair	protein ACCELERATED CELL DEATH 6-like protein isoform X2 [Cinnamomum micranthum f. kanehirae]
Phoebe_bournei_newGene_5886	--	--	Molecular Function: pectate lyase activity (GO:0030570);; Biological Process: pectin catabolic process (GO:0045490);; Molecular Function: metal ion binding (GO:0046872);;	K01728|1.4e-37|aof:109843275|K01728 pectate lyase [EC:4.2.2.2] | (RefSeq) probable pectate lyase 5	--	--	--	Probable pectate lyase 18 OS=Arabidopsis thaliana OX=3702 GN=At4g24780 PE=2 SV=2	Pectate lyase OS=Cinnamomum micranthum f. kanehirae OX=337451 GN=CKAN_01246400 PE=3 SV=1	G	Carbohydrate transport and metabolism	pectate lyase-like protein [Cinnamomum micranthum f. kanehirae]
Phoebe_bournei_newGene_5201	[J]	Translation, ribosomal structure and biogenesis	Molecular Function: aminoacyl-tRNA hydrolase activity (GO:0004045);;	K01056|1.4e-94|mesc:110614701|K01056 peptidyl-tRNA hydrolase, PTH1 family [EC:3.1.1.29] | (RefSeq) peptidyl-tRNA hydrolase, mitochondrial-like	[J]	Translation, ribosomal structure and biogenesis	Peptidyl-tRNA hydrolase	Peptidyl-tRNA hydrolase, chloroplastic OS=Arabidopsis thaliana OX=3702 GN=At1g18440 PE=2 SV=2	Peptidyl-tRNA hydrolase, chloroplastic-like protein isoform X1 OS=Cinnamomum micranthum f. kanehirae OX=337451 GN=CKAN_01437300 PE=3 SV=1	J	Translation, ribosomal structure and biogenesis	peptidyl-tRNA hydrolase, chloroplastic-like protein isoform X1 [Cinnamomum micranthum f. kanehirae]
Phoebe_bournei_newGene_10266	[W]	Extracellular structures	Molecular Function: protein kinase activity (GO:0004672);; Molecular Function: ATP binding (GO:0005524);; Cellular Component: integral component of membrane (GO:0016021);; Biological Process: recognition of pollen (GO:0048544);;	K01183|4.6e-36|nsy:104241083|K01183 chitinase [EC:3.2.1.14] | (RefSeq) chitinase-3-like protein 2	--	--	Protein tyrosine and serine/threonine kinase	G-type lectin S-receptor-like serine/threonine-protein kinase At4g03230 OS=Arabidopsis thaliana OX=3702 GN=At4g03230 PE=3 SV=3	Receptor-like serine/threonine-protein kinase SD1-6 OS=Cinnamomum micranthum f. kanehirae OX=337451 GN=CKAN_01709600 PE=4 SV=1	--	--	receptor-like serine/threonine-protein kinase SD1-6 [Cinnamomum micranthum f. kanehirae]
Phoebe_bournei_newGene_9165	[T]	Signal transduction mechanisms	Biological Process: phosphorelay signal transduction system (GO:0000160);; Molecular Function: DNA binding (GO:0003677);; Molecular Function: DNA-binding transcription factor activity (GO:0003700);; Cellular Component: nucleus (GO:0005634);;	K14491|5.2e-74|nnu:104605149|K14491 two-component response regulator ARR-B family | (RefSeq) two-component response regulator ARR2-like	[K]	Transcription	Response regulator receiver domain	Two-component response regulator ORR21 OS=Oryza sativa subsp. indica OX=39946 GN=RR21 PE=3 SV=1	Two-component response regulator ARR2-like protein isoform X1 OS=Cinnamomum micranthum f. kanehirae OX=337451 GN=CKAN_00491200 PE=4 SV=1	K	Transcription	two-component response regulator ARR2-like protein isoform X1 [Cinnamomum micranthum f. kanehirae]
Phoebe_bournei_newGene_2356	[O]	Posttranslational modification, protein turnover, chaperones	Molecular Function: peptidyl-prolyl cis-trans isomerase activity (GO:0003755);; Biological Process: protein folding (GO:0006457);;	K01802|1.7e-46|ppp:112276714|K01802 peptidylprolyl isomerase [EC:5.2.1.8] | (RefSeq) peptidyl-prolyl cis-trans isomerase CYP19-4-like	[O]	Posttranslational modification, protein turnover, chaperones	Cyclophilin type peptidyl-prolyl cis-trans isomerase/CLD	Peptidyl-prolyl cis-trans isomerase CYP21-1 OS=Arabidopsis thaliana OX=3702 GN=CYP21-1 PE=2 SV=1	Peptidyl-prolyl cis-trans isomerase OS=Cinnamomum micranthum f. kanehirae OX=337451 GN=CKAN_01144900 PE=3 SV=1	O	Posttranslational modification, protein turnover, chaperones	peptidyl-prolyl cis-trans isomerase CYP21-1 [Cinnamomum micranthum f. kanehirae]
Phoebe_bournei_newGene_3422	--	--	--	--	--	--	--	--	Uncharacterized protein OS=Cinnamomum micranthum f. kanehirae OX=337451 GN=CKAN_01490100 PE=4 SV=1	S	Function unknown	Protein of unknown function DUF3741 [Cinnamomum micranthum f. kanehirae]
Phoebe_bournei_newGene_11667	--	--	Molecular Function: structural constituent of ribosome (GO:0003735);; Cellular Component: mitochondrial ribosome (GO:0005761);; Biological Process: translation (GO:0006412);;	K17428|1.7e-62|han:110941757|K17428 large subunit ribosomal protein L47 | (RefSeq) 39S ribosomal protein L47, mitochondrial-like isoform X1	[J]	Translation, ribosomal structure and biogenesis	Mitochondrial 39-S ribosomal protein L47 (MRP-L47)	--	39S ribosomal protein L47, mitochondrial-like protein OS=Cinnamomum micranthum f. kanehirae OX=337451 GN=CKAN_01809600 PE=3 SV=1	J	Translation, ribosomal structure and biogenesis	39S ribosomal protein L47, mitochondrial-like protein [Cinnamomum micranthum f. kanehirae]
Phoebe_bournei_newGene_6735	--	--	Molecular Function: metal ion binding (GO:0046872);;	--	--	--	Transcription factor regulating root and shoot growth via Pin3	PH, RCC1 and FYVE domains-containing protein 1 OS=Arabidopsis thaliana OX=3702 GN=PRAF1 PE=1 SV=1	FYVE zinc finger OS=Cinnamomum micranthum f. kanehirae OX=337451 GN=CKAN_00541900 PE=4 SV=1	--	--	FYVE zinc finger [Cinnamomum micranthum f. kanehirae]
Phoebe_bournei_newGene_10396	--	--	Biological Process: guanosine tetraphosphate metabolic process (GO:0015969);;	--	--	--	--	--	GTP diphosphokinase OS=Cinnamomum micranthum f. kanehirae OX=337451 GN=CKAN_00972900 PE=3 SV=1	T	Signal transduction mechanisms	HD/PDEase domain-containing protein [Cinnamomum micranthum f. kanehirae]
Phoebe_bournei_newGene_13357	--	--	Molecular Function: protein kinase activity (GO:0004672);; Molecular Function: ATP binding (GO:0005524);;	--	[T]	Signal transduction mechanisms	--	MAP3K epsilon protein kinase 1 OS=Arabidopsis thaliana OX=3702 GN=M3KE1 PE=1 SV=1	MAP3K epsilon protein kinase 1-like protein isoform X2 OS=Cinnamomum micranthum f. kanehirae OX=337451 GN=CKAN_01863100 PE=4 SV=1	T	Signal transduction mechanisms	MAP3K epsilon protein kinase 1-like protein isoform X2 [Cinnamomum micranthum f. kanehirae]
Phoebe_bournei_newGene_1206	[C]	Energy production and conversion	Molecular Function: oxidoreductase activity, acting on the aldehyde or oxo group of donors, NAD or NADP as acceptor (GO:0016620);;	K12355|3.9e-242|egu:105048511|K12355 coniferyl-aldehyde dehydrogenase [EC:1.2.1.68] | (RefSeq) aldehyde dehydrogenase family 2 member C4	[C]	Energy production and conversion	Aldehyde dehydrogenase family	Aldehyde dehydrogenase family 2 member C4 OS=Arabidopsis thaliana OX=3702 GN=ALDH2C4 PE=1 SV=2	Aldehyde dehydrogenase family 2 member C4 OS=Cinnamomum micranthum f. kanehirae OX=337451 GN=CKAN_01176800 PE=3 SV=1	C	Energy production and conversion	aldehyde dehydrogenase family 2 member C4 [Cinnamomum micranthum f. kanehirae]
Phoebe_bournei_newGene_2991	[O]	Posttranslational modification, protein turnover, chaperones	Molecular Function: protein binding (GO:0005515);;	K08770|1.2e-211|crb:17896150|K08770 ubiquitin C | (RefSeq) polyubiquitin	[OR]	--	Ubiquitin family	Polyubiquitin OS=Nicotiana sylvestris OX=4096 GN=UBI11 PE=2 SV=1	Putative ubiquitin OS=Cinnamomum micranthum f. kanehirae OX=337451 GN=CKAN_00930400 PE=4 SV=1	O	Posttranslational modification, protein turnover, chaperones	putative ubiquitin [Cinnamomum micranthum f. kanehirae]
Phoebe_bournei_newGene_9883	--	--	Molecular Function: GTP binding (GO:0005525);;	K07942|5.4e-54|lang:109355369|K07942 ADP-ribosylation factor-like protein 1 | (RefSeq) ADP-ribosylation factor 1	[U]	Intracellular trafficking, secretion, and vesicular transport	ADP-ribosylation factor family	ADP-ribosylation factor 1 OS=Brassica rapa subsp. pekinensis OX=51351 GN=ARF1 PE=2 SV=3	Uncharacterized protein OS=Lupinus angustifolius OX=3871 GN=TanjilG_13412 PE=3 SV=1	U	Intracellular trafficking, secretion, and vesicular transport	PREDICTED: ADP-ribosylation factor 1 [Lupinus angustifolius]
Phoebe_bournei_newGene_9222	--	--	Molecular Function: DNA binding (GO:0003677);; Cellular Component: nucleus (GO:0005634);; Biological Process: regulation of transcription, DNA-templated (GO:0006355);;	K00521|5.3e-31|cmos:111447866|K00521 ferric-chelate reductase [EC:1.16.1.7] | (RefSeq) ferric reduction oxidase 7, chloroplastic-like	--	--	No apical meristem (NAM) protein	NAC domain-containing protein 21/22 OS=Arabidopsis thaliana OX=3702 GN=NAC021 PE=1 SV=2	NAC domain-containing protein 21/22-like protein OS=Cinnamomum micranthum f. kanehirae OX=337451 GN=CKAN_02603000 PE=4 SV=1	K	Transcription	NAC domain-containing protein 21/22-like protein [Cinnamomum micranthum f. kanehirae]
Phoebe_bournei_newGene_5208	--	--	Biological Process: ubiquitin-dependent protein catabolic process (GO:0006511);; Biological Process: protein deubiquitination (GO:0016579);; Molecular Function: thiol-dependent ubiquitinyl hydrolase activity (GO:0036459);;	K11838|0.0e+00|nnu:104601486|K11838 ubiquitin carboxyl-terminal hydrolase 7 [EC:3.4.19.12] | (RefSeq) ubiquitin carboxyl-terminal hydrolase 12	[O]	Posttranslational modification, protein turnover, chaperones	ICP0-binding domain of Ubiquitin-specific protease 7	Ubiquitin carboxyl-terminal hydrolase 13 OS=Arabidopsis thaliana OX=3702 GN=UBP13 PE=1 SV=1	Ubiquitinyl hydrolase 1 OS=Cinnamomum micranthum f. kanehirae OX=337451 GN=CKAN_01085400 PE=3 SV=1	O	Posttranslational modification, protein turnover, chaperones	ubiquitin carboxyl-terminal hydrolase 12 isoform X1 [Cinnamomum micranthum f. kanehirae]
Phoebe_bournei_newGene_5533	--	--	Biological Process: regulation of carbohydrate metabolic process (GO:0006109);; Biological Process: biological_process (GO:0008150);; Biological Process: regulation of biosynthetic process (GO:0009889);; Biological Process: negative regulation of biosynthetic process (GO:0009890);; Biological Process: negative regulation of metabolic process (GO:0009892);; Biological Process: regulation of cellul…	--	--	--	Protein of unknown function (DUF295)	Putative F-box protein At5g55150 OS=Arabidopsis thaliana OX=3702 GN=At5g55150 PE=4 SV=2	F-box protein skip23 OS=Cinnamomum micranthum f. kanehirae OX=337451 GN=CKAN_01361400 PE=4 SV=1	S	Function unknown	f-box protein skip23 [Cinnamomum micranthum f. kanehirae]
Phoebe_bournei_newGene_2479	--	--	--	K14494|2.3e-60|pavi:110759924|K14494 DELLA protein | (RefSeq) DELLA protein DWARF8-like isoform X1	--	--	GRAS domain family	Chitin-inducible gibberellin-responsive protein 1 OS=Oryza sativa subsp. japonica OX=39947 GN=CIGR1 PE=2 SV=1	Chitin-inducible gibberellin-responsive protein 1-like protein OS=Cinnamomum micranthum f. kanehirae OX=337451 GN=CKAN_01736300 PE=3 SV=1	K	Transcription	chitin-inducible gibberellin-responsive protein 1-like protein [Cinnamomum micranthum f. kanehirae]
Phoebe_bournei_newGene_5199	--	--	Cellular Component: spindle (GO:0005819);; Cellular Component: microtubule (GO:0005874);; Biological Process: activation of protein kinase activity (GO:0032147);; Biological Process: regulation of mitotic spindle organization (GO:0060236);;	K16812|7.1e-12|zma:103647702|K16812 targeting protein for Xklp2 | (RefSeq) protein TPX2 isoform X1	--	--	Targeting protein for Xklp2 (TPX2) domain	--	Protein TPX2 isoform X2 OS=Cinnamomum micranthum f. kanehirae OX=337451 GN=CKAN_01080400 PE=3 SV=1	S	Function unknown	protein TPX2 isoform X2 [Cinnamomum micranthum f. kanehirae]
Phoebe_bournei_newGene_10946	--	--	Molecular Function: structural constituent of ribosome (GO:0003735);; Cellular Component: ribosome (GO:0005840);; Biological Process: translation (GO:0006412);;	K02917|1.1e-26|adu:107457756|K02917 large subunit ribosomal protein L35Ae | (RefSeq) 60S ribosomal protein L35a-1	[J]	Translation, ribosomal structure and biogenesis	Ribosomal protein L35Ae	60S ribosomal protein L35a-1 OS=Arabidopsis thaliana OX=3702 GN=RPL35AA PE=3 SV=1	60S ribosomal protein L35a-1 OS=Cinnamomum micranthum f. kanehirae OX=337451 GN=CKAN_00949000 PE=3 SV=1	J	Translation, ribosomal structure and biogenesis	60S ribosomal protein L35a-1 [Cinnamomum micranthum f. kanehirae]
Phoebe_bournei_newGene_7993	[R]	General function prediction only	Biological Process: lipid catabolic process (GO:0016042);; Molecular Function: hydrolase activity (GO:0016787);;	--	[I]	Lipid transport and metabolism	Patatin-like phospholipase	Probable inactive patatin-like protein 9 OS=Arabidopsis thaliana OX=3702 GN=PLP9 PE=2 SV=1	Patatin OS=Cinnamomum micranthum f. kanehirae OX=337451 GN=CKAN_00513600 PE=3 SV=1	I	Lipid transport and metabolism	Patatin/Phospholipase A2-related [Cinnamomum micranthum f. kanehirae]
Phoebe_bournei_newGene_6422	--	--	Molecular Function: DNA-binding transcription factor activity (GO:0003700);; Cellular Component: nucleus (GO:0005634);; Molecular Function: sequence-specific DNA binding (GO:0043565);;	K18834|8.6e-22|soe:110803840|K18834 WRKY transcription factor 1 | (RefSeq) WRKY transcription factor 1	--	--	WRKY DNA -binding domain	WRKY transcription factor 42 OS=Arabidopsis thaliana OX=3702 GN=WRKY42 PE=1 SV=1	Putative WRKY transcription factor 31 OS=Cinnamomum micranthum f. kanehirae OX=337451 GN=CKAN_02548900 PE=4 SV=1	K	Transcription	putative WRKY transcription factor 31 [Cinnamomum micranthum f. kanehirae]
Phoebe_bournei_newGene_9775	--	--	Molecular Function: protein serine/threonine kinase activity (GO:0004674);; Molecular Function: calcium ion binding (GO:0005509);; Molecular Function: ATP binding (GO:0005524);; Cellular Component: integral component of membrane (GO:0016021);; Molecular Function: polysaccharide binding (GO:0030247);;	K23544|9.8e-46|brp:103842861|K23544 serine incorporator 1/3 | (RefSeq) serine incorporator 3	--	--	Protein kinase domain	Wall-associated receptor kinase 2 OS=Arabidopsis thaliana OX=3702 GN=WAK2 PE=1 SV=1	Putative wall-associated receptor kinase-like protein 16 OS=Cinnamomum micranthum f. kanehirae OX=337451 GN=CKAN_02423400 PE=4 SV=1	T	Signal transduction mechanisms	putative wall-associated receptor kinase-like protein 16 [Cinnamomum micranthum f. kanehirae]
Phoebe_bournei_newGene_9573	[R]	General function prediction only	Molecular Function: molecular_function (GO:0003674);; Molecular Function: catalytic activity (GO:0003824);; Molecular Function: ubiquitin-protein transferase activity (GO:0004842);; Cellular Component: cellular_component (GO:0005575);; Cellular Component: obsolete cell (GO:0005623);; Cellular Component: plasma membrane (GO:0005886);; Biological Process: cellular protein modification process (GO:0…	--	--	--	von Willebrand factor type A domain	E3 ubiquitin-protein ligase WAV3 OS=Arabidopsis thaliana OX=3702 GN=WAV3 PE=1 SV=1	Zinc finger family protein OS=Cinnamomum micranthum f. kanehirae OX=337451 GN=CKAN_01163200 PE=4 SV=1	O	Posttranslational modification, protein turnover, chaperones	Zinc finger family protein [Cinnamomum micranthum f. kanehirae]
Phoebe_bournei_newGene_9388	--	--	Molecular Function: magnesium ion binding (GO:0000287);; Molecular Function: terpene synthase activity (GO:0010333);;	K15803|9.9e-32|tcc:18593711|K15803 (-)-germacrene D synthase [EC:4.2.3.75] | (RefSeq) (+)-delta-cadinene synthase isozyme A	--	--	Terpene synthase family, metal binding domain	Probable terpene synthase 2 OS=Ricinus communis OX=3988 GN=TPS2 PE=3 SV=1	Terpene synthase 1 OS=Cinnamomum micranthum f. kanehirae OX=337451 GN=CKAN_02276600 PE=4 SV=1	S	Function unknown	terpene synthase 1 [Cinnamomum micranthum f. kanehirae]
Phoebe_bournei_newGene_11445	[L]	Replication, recombination and repair	Molecular Function: DNA clamp loader activity (GO:0003689);; Molecular Function: ATP binding (GO:0005524);; Cellular Component: nucleus (GO:0005634);; Cellular Component: DNA replication factor C complex (GO:0005663);; Biological Process: DNA replication (GO:0006260);; Biological Process: DNA repair (GO:0006281);;	K10754|0.0e+00|egu:105042420|K10754 replication factor C subunit 1 | (RefSeq) replication factor C subunit 1 isoform X1	[L]	Replication, recombination and repair	Replication factor RFC1 C terminal domain	Replication factor C subunit 1 OS=Oryza sativa subsp. japonica OX=39947 GN=RFC1 PE=2 SV=2	Replication factor C subunit 1 OS=Cinnamomum micranthum f. kanehirae OX=337451 GN=CKAN_01744100 PE=3 SV=1	L	Replication, recombination and repair	replication factor C subunit 1 isoform X2 [Cinnamomum micranthum f. kanehirae]
Phoebe_bournei_newGene_10565	[R]	General function prediction only	Molecular Function: metalloendopeptidase activity (GO:0004222);; Cellular Component: mitochondrion (GO:0005739);; Biological Process: protein processing involved in protein targeting to mitochondrion (GO:0006627);; Molecular Function: metal ion binding (GO:0046872);;	K01412|4.1e-152|atr:18443492|K01412 mitochondrial-processing peptidase subunit alpha [EC:3.4.24.64] | (RefSeq) mitochondrial-processing peptidase subunit alpha	[O]	Posttranslational modification, protein turnover, chaperones	Insulinase (Peptidase family M16)	Mitochondrial-processing peptidase subunit alpha OS=Solanum tuberosum OX=4113 GN=MPP PE=1 SV=1	Alpha-MPP OS=Cinnamomum micranthum f. kanehirae OX=337451 GN=CKAN_00187300 PE=3 SV=1	O	Posttranslational modification, protein turnover, chaperones	mitochondrial-processing peptidase subunit alpha-like protein [Cinnamomum micranthum f. kanehirae]
Phoebe_bournei_newGene_12801	[H]	Coenzyme transport and metabolism	Molecular Function: uroporphyrinogen-III synthase activity (GO:0004852);; Biological Process: uroporphyrinogen III biosynthetic process (GO:0006780);; Biological Process: protoporphyrinogen IX biosynthetic process (GO:0006782);;	K01719|2.9e-68|nnu:104605667|K01719 uroporphyrinogen-III synthase [EC:4.2.1.75] | (RefSeq) uroporphyrinogen-III synthase, chloroplastic	--	--	Uroporphyrinogen-III synthase HemD	Uroporphyrinogen-III synthase, chloroplastic OS=Oryza sativa subsp. japonica OX=39947 GN=UROS PE=2 SV=1	Uroporphyrinogen-III synthase OS=Cinnamomum micranthum f. kanehirae OX=337451 GN=CKAN_01909900 PE=3 SV=1	H	Coenzyme transport and metabolism	uroporphyrinogen-III synthase, chloroplastic [Cinnamomum micranthum f. kanehirae]
Phoebe_bournei_newGene_6301	--	--	--	K15255|6.8e-11|jre:109004921|K15255 ATP-dependent DNA helicase PIF1 [EC:3.6.4.12] | (RefSeq) ATP-dependent DNA helicase PIF4-like	--	--	--	--	Nucleic acid-binding, OB-fold containing protein OS=Trema orientale OX=63057 GN=TorRG33x02_256550 PE=4 SV=1	--	--	replication protein A 70 kDa DNA-binding subunit B-like [Camellia sinensis]
Phoebe_bournei_newGene_5681	--	--	--	K10268|1.7e-33|mus:103984848|K10268 F-box and leucine-rich repeat protein 2/20 | (RefSeq) F-box protein At5g51380-like	[R]	General function prediction only	--	F-box protein At5g51370 OS=Arabidopsis thaliana OX=3702 GN=At5g51370 PE=2 SV=1	Leucine-rich repeat OS=Cinnamomum micranthum f. kanehirae OX=337451 GN=CKAN_01559800 PE=4 SV=1	S	Function unknown	Leucine-rich repeat [Cinnamomum micranthum f. kanehirae]
Phoebe_bournei_newGene_9238	[M]	Cell wall/membrane/envelope biogenesis	Molecular Function: protein kinase activity (GO:0004672);; Molecular Function: ATP binding (GO:0005524);; Cellular Component: integral component of membrane (GO:0016021);;	K13415|7.4e-99|han:110929858|K13415 protein brassinosteroid insensitive 1 [EC:2.7.10.1 2.7.11.1] | (RefSeq) systemin receptor SR160-like	--	--	Protein tyrosine and serine/threonine kinase	MDIS1-interacting receptor like kinase 2 OS=Arabidopsis thaliana OX=3702 GN=MIK2 PE=1 SV=3	MDIS1-interacting receptor like kinase 2-like protein OS=Cinnamomum micranthum f. kanehirae OX=337451 GN=CKAN_02598400 PE=4 SV=1	T	Signal transduction mechanisms	MDIS1-interacting receptor like kinase 2-like protein [Cinnamomum micranthum f. kanehirae]
Phoebe_bournei_newGene_899	[J]	Translation, ribosomal structure and biogenesis	Molecular Function: translation elongation factor activity (GO:0003746);; Cellular Component: cytoplasm (GO:0005737);;	K02356|3.0e-91|zju:107431076|K02356 elongation factor P | (RefSeq) uncharacterized protein LOC107431076	--	--	Elongation factor P, C-terminal	--	Uncharacterized protein OS=Acer yangbiense OX=1000413 GN=EZV62_015349 PE=3 SV=1	J	Translation, ribosomal structure and biogenesis	uncharacterized protein LOC107431076 [Ziziphus jujuba]
Phoebe_bournei_newGene_385	--	--	Molecular Function: protein dimerization activity (GO:0046983);;	--	--	--	--	Transcription factor LHW OS=Arabidopsis thaliana OX=3702 GN=LHW PE=1 SV=1	Transcription factor LHW-like protein isoform X3 OS=Cinnamomum micranthum f. kanehirae OX=337451 GN=CKAN_01844400 PE=4 SV=1	S	Function unknown	transcription factor LHW-like protein isoform X3 [Cinnamomum micranthum f. kanehirae]
Phoebe_bournei_newGene_9817	[T]	Signal transduction mechanisms	Molecular Function: voltage-gated potassium channel activity (GO:0005249);; Cellular Component: integral component of membrane (GO:0016021);; Biological Process: regulation of ion transmembrane transport (GO:0034765);;	K21867|0.0e+00|pda:103702633|K21867 potassium channel | (RefSeq) potassium channel AKT2 isoform X1	[PT]	--	Ion transport protein	Potassium channel AKT2/3 OS=Arabidopsis thaliana OX=3702 GN=AKT2 PE=1 SV=1	Potassium channel AKT2 OS=Cinnamomum micranthum f. kanehirae OX=337451 GN=CKAN_01419100 PE=3 SV=1	--	--	potassium channel AKT2 [Cinnamomum micranthum f. kanehirae]
Phoebe_bournei_newGene_2704	[L]	Replication, recombination and repair	Molecular Function: ubiquitin-protein transferase activity (GO:0004842);;	K08332|1.4e-55|dosa:Os01t0948500-01|K08332 vacuolar protein 8 | (RefSeq) Os01g0948500; Armadillo-like helical domain containing protein.	[S]	Function unknown	U-box domain	U-box domain-containing protein 44 OS=Arabidopsis thaliana OX=3702 GN=PUB44 PE=1 SV=1	RING-type E3 ubiquitin transferase OS=Cinnamomum micranthum f. kanehirae OX=337451 GN=CKAN_00706600 PE=4 SV=1	S	Function unknown	U-box domain-containing protein 44-like protein [Cinnamomum micranthum f. kanehirae]
Phoebe_bournei_newGene_4165	--	--	Molecular Function: chromatin binding (GO:0003682);;	--	--	--	--	--	SAWADEE domain-containing protein OS=Cinnamomum micranthum f. kanehirae OX=337451 GN=CKAN_01032600 PE=4 SV=1	S	Function unknown	hypothetical protein CKAN_01032600 [Cinnamomum micranthum f. kanehirae]
Phoebe_bournei_newGene_12548	--	--	Cellular Component: integral component of membrane (GO:0016021);;	K13466|4.1e-10|zju:107423984|K13466 EIX receptor 1/2 | (RefSeq) receptor-like protein EIX2	[R]	General function prediction only	Leucine rich repeat	Receptor-like protein 7 OS=Arabidopsis thaliana OX=3702 GN=RLP7 PE=3 SV=2	Receptor-like protein 12 OS=Cinnamomum micranthum f. kanehirae OX=337451 GN=CKAN_00746100 PE=4 SV=1	S	Function unknown	receptor-like protein 12 [Cinnamomum micranthum f. kanehirae]
Phoebe_bournei_newGene_13124	--	--	--	--	--	--	Myb/SANT-like DNA-binding domain	--	Myb_DNA-bind_3 domain-containing protein OS=Hevea brasiliensis OX=3981 GN=GH714_017681 PE=4 SV=1	S	Function unknown	uncharacterized protein LOC114716406 [Prosopis alba]
Phoebe_bournei_newGene_7886	--	--	Cellular Component: nucleus (GO:0005634);; Biological Process: regulation of transcription, DNA-templated (GO:0006355);; Molecular Function: zinc ion binding (GO:0008270);;	K17604|2.8e-10|dcr:108207429|K17604 zinc finger SWIM domain-containing protein 3 | (RefSeq) protein FAR1-RELATED SEQUENCE 5-like	--	--	FAR1 DNA-binding domain	--	Protein FAR1-RELATED SEQUENCE OS=Cinnamomum micranthum f. kanehirae OX=337451 GN=CKAN_00701600 PE=3 SV=1	S	Function unknown	protein FAR1-RELATED SEQUENCE 5-like protein [Cinnamomum micranthum f. kanehirae]
Phoebe_bournei_newGene_6402	--	--	Molecular Function: iron ion binding (GO:0005506);; Cellular Component: ribosome (GO:0005840);; Cellular Component: integral component of membrane (GO:0016021);; Molecular Function: oxidoreductase activity, acting on paired donors, with incorporation or reduction of molecular oxygen (GO:0016705);; Molecular Function: heme binding (GO:0020037);;	--	--	--	--	--	60S ribosomal protein L18a-like protein OS=Cinnamomum micranthum f. kanehirae OX=337451 GN=CKAN_02553600 PE=4 SV=1	--	--	60S ribosomal protein L18a-like protein [Cinnamomum micranthum f. kanehirae]
Phoebe_bournei_newGene_1324	--	--	Cellular Component: Ino80 complex (GO:0031011);;	--	--	--	--	--	Nuclear factor related to kappa-B-binding protein OS=Cinnamomum micranthum f. kanehirae OX=337451 GN=CKAN_00274300 PE=4 SV=1	--	--	Nuclear factor related to kappa-B-binding protein [Cinnamomum micranthum f. kanehirae]
Phoebe_bournei_newGene_520	--	--	Molecular Function: DNA binding (GO:0003677);; Cellular Component: nucleus (GO:0005634);; Molecular Function: lipid binding (GO:0008289);;	K09338|3.4e-34|aof:109836305|K09338 homeobox-leucine zipper protein | (RefSeq) homeobox-leucine zipper protein HOX9-like	--	--	--	Homeobox-leucine zipper protein HOX10 OS=Oryza sativa subsp. indica OX=39946 GN=HOX10 PE=2 SV=2	Homeobox-leucine zipper protein REVOLUTA-like protein OS=Cinnamomum micranthum f. kanehirae OX=337451 GN=CKAN_02606500 PE=3 SV=1	K	Transcription	homeobox-leucine zipper protein REVOLUTA-like protein [Cinnamomum micranthum f. kanehirae]
Phoebe_bournei_newGene_885	[Q]	Secondary metabolites biosynthesis, transport and catabolism	--	K08234|4.8e-71|dcr:108197596|K08234 glyoxylase I family protein | (RefSeq) uncharacterized protein LOC108197596	--	--	Glyoxalase/Bleomycin resistance protein/Dioxygenase superfamily	--	VOC domain-containing protein OS=Daucus carota subsp. sativus OX=79200 GN=DCAR_028277 PE=4 SV=1	S	Function unknown	uncharacterized protein LOC113773293 [Coffea eugenioides]
Phoebe_bournei_newGene_871	--	--	Cellular Component: nascent polypeptide-associated complex (GO:0005854);;	K21919|9.8e-11|fve:101312714|K21919 BTB/POZ domain-containing protein KCTD9 | (RefSeq) FH protein interacting protein FIP2-like	[K]	Transcription	NAC domain	Nascent polypeptide-associated complex subunit alpha-like protein 1 OS=Arabidopsis thaliana OX=3702 GN=At3g12390 PE=1 SV=1	Nascent polypeptide-associated complex subunit alpha-like protein 1 OS=Cinnamomum micranthum f. kanehirae OX=337451 GN=CKAN_00841100 PE=4 SV=1	K	Transcription	nascent polypeptide-associated complex subunit alpha-like protein 1 [Cinnamomum micranthum f. kanehirae]
Phoebe_bournei_newGene_11601	--	--	Molecular Function: protein binding (GO:0005515);; Cellular Component: integral component of membrane (GO:0016021);;	--	--	--	Leucine rich repeat	--	Uncharacterized protein (Fragment) OS=Eragrostis curvula OX=38414 GN=EJB05_30484 PE=4 SV=1	V	Defense mechanisms	hypothetical protein EJB05_30484, partial [Eragrostis curvula]
Phoebe_bournei_newGene_2987	[O]	Posttranslational modification, protein turnover, chaperones	Molecular Function: peptidyl-prolyl cis-trans isomerase activity (GO:0003755);; Biological Process: protein folding (GO:0006457);;	K12734|1.1e-59|jcu:105643101|K12734 peptidyl-prolyl cis-trans isomerase-like 3 [EC:5.2.1.8] | (RefSeq) peptidyl-prolyl cis-trans isomerase CYP18-1	[O]	Posttranslational modification, protein turnover, chaperones	Cyclophilin type peptidyl-prolyl cis-trans isomerase/CLD	Peptidyl-prolyl cis-trans isomerase CYP18-1 OS=Arabidopsis thaliana OX=3702 GN=CYP18-1 PE=2 SV=1	Peptidyl-prolyl cis-trans isomerase OS=Cinnamomum micranthum f. kanehirae OX=337451 GN=CKAN_01555400 PE=3 SV=1	O	Posttranslational modification, protein turnover, chaperones	peptidyl-prolyl cis-trans isomerase CYP18-1 [Cinnamomum micranthum f. kanehirae]
Phoebe_bournei_newGene_7410	--	--	Cellular Component: integral component of membrane (GO:0016021);;	K21435|9.9e-17|gmx:100795993|K21435 ankyrin repeat domain-containing protein 6 | (RefSeq) espin	--	--	Ankyrin repeats (3 copies)	--	Ankyrin repeat-containing protein BDA1-like protein OS=Cinnamomum micranthum f. kanehirae OX=337451 GN=CKAN_01926800 PE=4 SV=1	S	Function unknown	ankyrin repeat-containing protein BDA1-like protein [Cinnamomum micranthum f. kanehirae]
Phoebe_bournei_newGene_3661	[R]	General function prediction only	Biological Process: defense response (GO:0006952);; Molecular Function: ADP binding (GO:0043531);;	K15078|1.1e-79|vvi:100255136|K15078 structure-specific endonuclease subunit SLX1 [EC:3.6.1.-] | (RefSeq) putative disease resistance protein RGA1	[T]	Signal transduction mechanisms	NB-ARC domain	Putative disease resistance protein RGA3 OS=Solanum bulbocastanum OX=147425 GN=RGA3 PE=2 SV=2	Putative disease resistance protein RGA1 OS=Cinnamomum micranthum f. kanehirae OX=337451 GN=CKAN_00829200 PE=4 SV=1	T	Signal transduction mechanisms	putative disease resistance protein RGA1 [Cinnamomum micranthum f. kanehirae]
Phoebe_bournei_newGene_9643	--	--	--	K03860|8.7e-12|nnu:104608881|K03860 phosphatidylinositol N-acetylglucosaminyltransferase subunit Q | (RefSeq) N-acetylglucosaminyl-phosphatidylinositol biosynthetic protein gpi1-like	--	--	Gibberellin regulated protein	Snakin-1 OS=Solanum tuberosum OX=4113 GN=SN1 PE=1 SV=1	Peamaclein OS=Cinnamomum micranthum f. kanehirae OX=337451 GN=CKAN_00652100 PE=3 SV=1	S	Function unknown	peamaclein [Cinnamomum micranthum f. kanehirae]
Phoebe_bournei_newGene_9162	[G]	Carbohydrate transport and metabolism	Molecular Function: polygalacturonase activity (GO:0004650);; Biological Process: carbohydrate metabolic process (GO:0005975);;	--	--	--	Glycosyl hydrolases family 28	--	Glycoside hydrolase OS=Cinnamomum micranthum f. kanehirae OX=337451 GN=CKAN_00492400 PE=3 SV=1	G	Carbohydrate transport and metabolism	Glycoside hydrolase [Cinnamomum micranthum f. kanehirae]
Phoebe_bournei_newGene_11691	--	--	Molecular Function: RNA binding (GO:0003723);;	K17579|8.1e-48|vcn:VOLCADRAFT_98760|K17579 protein phosphatase 1 regulatory subunit 42 | (RefSeq) hypothetical protein	[D]	Cell cycle control, cell division, chromosome partitioning	RNA recognition motif 2	Protein MEI2-like 2 OS=Oryza sativa subsp. japonica OX=39947 GN=ML2 PE=2 SV=1	Protein MEI2-like protein 2 OS=Cinnamomum micranthum f. kanehirae OX=337451 GN=CKAN_01811400 PE=4 SV=1	A	RNA processing and modification	protein MEI2-like protein 2 [Cinnamomum micranthum f. kanehirae]
Phoebe_bournei_newGene_6377	[Q]	Secondary metabolites biosynthesis, transport and catabolism	Molecular Function: oxidoreductase activity (GO:0016491);; Molecular Function: metal ion binding (GO:0046872);;	K05658|1.4e-87|cpep:111781709|K05658 ATP-binding cassette, subfamily B (MDR/TAP), member 1 [EC:7.6.2.2] | (RefSeq) uncharacterized protein LOC111781709	[QR]	--	non-haem dioxygenase in morphine synthesis N-terminal	Protein SRG1 OS=Arabidopsis thaliana OX=3702 GN=SRG1 PE=2 SV=1	Protein SRG1-like protein OS=Cinnamomum micranthum f. kanehirae OX=337451 GN=CKAN_02563300 PE=3 SV=1	Q	Secondary metabolites biosynthesis, transport and catabolism	protein SRG1-like protein [Cinnamomum micranthum f. kanehirae]
Phoebe_bournei_newGene_11700	--	--	Molecular Function: copper ion binding (GO:0005507);; Biological Process: lignin catabolic process (GO:0046274);; Cellular Component: apoplast (GO:0048046);; Molecular Function: hydroquinone:oxygen oxidoreductase activity (GO:0052716);;	K05909|9.0e-35|cann:107864788|K05909 laccase [EC:1.10.3.2] | (RefSeq) laccase-1-like	[Q]	Secondary metabolites biosynthesis, transport and catabolism	--	Laccase-1 OS=Arabidopsis thaliana OX=3702 GN=LAC1 PE=2 SV=1	Laccase OS=Cinnamomum micranthum f. kanehirae OX=337451 GN=CKAN_01812300 PE=3 SV=1	Q	Secondary metabolites biosynthesis, transport and catabolism	laccase-1 [Cinnamomum micranthum f. kanehirae]
Phoebe_bournei_newGene_10300	--	--	--	--	--	--	Myb/SANT-like DNA-binding domain	--	L10-interacting MYB domain-containing protein isoform X2 OS=Cinnamomum micranthum f. kanehirae OX=337451 GN=CKAN_00468900 PE=4 SV=1	S	Function unknown	L10-interacting MYB domain-containing protein isoform X2 [Cinnamomum micranthum f. kanehirae]
Phoebe_bournei_newGene_9350	--	--	Molecular Function: catechol oxidase activity (GO:0004097);; Biological Process: pigment biosynthetic process (GO:0046148);; Molecular Function: metal ion binding (GO:0046872);;	K00422|1.1e-195|nnu:104588895|K00422 polyphenol oxidase [EC:1.10.3.1] | (RefSeq) PPOA; polyphenol oxidase, chloroplastic-like	--	--	Protein of unknown function (DUF_B2219)	Polyphenol oxidase, chloroplastic OS=Malus domestica OX=3750 PE=1 SV=1	Polyphenol oxidase, chloroplastic-like protein OS=Cinnamomum micranthum f. kanehirae OX=337451 GN=CKAN_01331000 PE=3 SV=1	S	Function unknown	polyphenol oxidase, chloroplastic-like protein [Cinnamomum micranthum f. kanehirae]
Phoebe_bournei_newGene_11498	--	--	Cellular Component: nucleus (GO:0005634);; Biological Process: regulation of transcription, DNA-templated (GO:0006355);; Molecular Function: zinc ion binding (GO:0008270);;	K17604|2.0e-19|lang:109340504|K17604 zinc finger SWIM domain-containing protein 3 | (RefSeq) protein FAR1-RELATED SEQUENCE 5-like	--	--	--	--	Protein FAR1-RELATED SEQUENCE OS=Cinnamomum micranthum f. kanehirae OX=337451 GN=CKAN_00883000 PE=3 SV=1	--	--	protein FAR1-RELATED SEQUENCE 5-like protein [Cinnamomum micranthum f. kanehirae]
Phoebe_bournei_newGene_5112	[Q]	Secondary metabolites biosynthesis, transport and catabolism	Molecular Function: oxidoreductase activity (GO:0016491);; Molecular Function: metal ion binding (GO:0046872);;	K05658|5.1e-35|cpep:111781709|K05658 ATP-binding cassette, subfamily B (MDR/TAP), member 1 [EC:7.6.2.2] | (RefSeq) uncharacterized protein LOC111781709	[QR]	--	2OG-Fe(II) oxygenase superfamily	Protein SRG1 OS=Arabidopsis thaliana OX=3702 GN=SRG1 PE=2 SV=1	Senescence-related protein OS=Cinnamomum micranthum f. kanehirae OX=337451 GN=CKAN_02678600 PE=3 SV=1	Q	Secondary metabolites biosynthesis, transport and catabolism	senescence-related protein [Cinnamomum micranthum f. kanehirae]
Phoebe_bournei_newGene_13048	--	--	--	--	--	--	--	--	Uncharacterized protein OS=Cinnamomum micranthum f. kanehirae OX=337451 GN=CKAN_00325300 PE=4 SV=1	--	--	hypothetical protein CKAN_00325300 [Cinnamomum micranthum f. kanehirae]
Phoebe_bournei_newGene_9500	[Q]	Secondary metabolites biosynthesis, transport and catabolism	Molecular Function: copper ion binding (GO:0005507);; Molecular Function: primary amine oxidase activity (GO:0008131);; Biological Process: amine metabolic process (GO:0009308);; Molecular Function: quinone binding (GO:0048038);;	K00276|4.5e-34|egr:104417376|K00276 primary-amine oxidase [EC:1.4.3.21] | (RefSeq) primary amine oxidase	[Q]	Secondary metabolites biosynthesis, transport and catabolism	Copper amine oxidase, enzyme domain	Primary amine oxidase 2 OS=Arabidopsis thaliana OX=3702 GN=At1g31672 PE=3 SV=1	Amine oxidase OS=Cinnamomum micranthum f. kanehirae OX=337451 GN=CKAN_00621600 PE=3 SV=1	Q	Secondary metabolites biosynthesis, transport and catabolism	Copper amine oxidase [Cinnamomum micranthum f. kanehirae]
Phoebe_bournei_newGene_2071	[R]	General function prediction only	Molecular Function: GTPase activity (GO:0003924);; Molecular Function: GTP binding (GO:0005525);;	K07874|1.3e-108|pop:7461998|K07874 Ras-related protein Rab-1A | (RefSeq) GTP-binding protein YPTM2	[TU]	--	Ras family	GTP-binding protein YPTM2 OS=Zea mays OX=4577 GN=YPTM2 PE=2 SV=1	GTP-binding family protein OS=Cinnamomum micranthum f. kanehirae OX=337451 GN=CKAN_01635200 PE=4 SV=1	U	Intracellular trafficking, secretion, and vesicular transport	GTP-binding family protein [Cinnamomum micranthum f. kanehirae]
Phoebe_bournei_newGene_12424	[P]	Inorganic ion transport and metabolism	Biological Process: potassium ion transport (GO:0006813);; Molecular Function: solute:proton antiporter activity (GO:0015299);; Cellular Component: integral component of membrane (GO:0016021);;	--	[P]	Inorganic ion transport and metabolism	Sodium/hydrogen exchanger family	K(+) efflux antiporter 3, chloroplastic OS=Arabidopsis thaliana OX=3702 GN=KEA3 PE=1 SV=2	K+ efflux antiporter 3, chloroplastic-like protein OS=Cinnamomum micranthum f. kanehirae OX=337451 GN=CKAN_01163400 PE=4 SV=1	P	Inorganic ion transport and metabolism	K+ efflux antiporter 3, chloroplastic-like protein [Cinnamomum micranthum f. kanehirae]
Phoebe_bournei_newGene_2998	[O]	Posttranslational modification, protein turnover, chaperones	Molecular Function: metalloendopeptidase activity (GO:0004222);;	K23010|2.2e-30|csv:101206881|K23010 metalloendopeptidase OMA1, mitochondrial [EC:3.4.24.-] | (RefSeq) uncharacterized protein LOC101206881	[O]	Posttranslational modification, protein turnover, chaperones	Peptidase family M48	--	Peptidase M48 OS=Cinnamomum micranthum f. kanehirae OX=337451 GN=CKAN_01555000 PE=4 SV=1	O	Posttranslational modification, protein turnover, chaperones	Peptidase M48 [Cinnamomum micranthum f. kanehirae]
Phoebe_bournei_newGene_8963	--	--	--	--	--	--	--	--	Uncharacterized protein OS=Lupinus albus OX=3870 GN=Lal_00048555 PE=4 SV=1	--	--	PREDICTED: uncharacterized protein LOC105953700 [Erythranthe guttata]
Phoebe_bournei_newGene_6525	--	--	Molecular Function: serine-type endopeptidase activity (GO:0004252);;	--	--	--	--	--	Peptidase S8/S53 domain-containing protein OS=Cinnamomum micranthum f. kanehirae OX=337451 GN=CKAN_01666000 PE=3 SV=1	--	--	Peptidase S8/S53 domain-containing protein [Cinnamomum micranthum f. kanehirae]
Phoebe_bournei_newGene_8821	--	--	Cellular Component: integral component of membrane (GO:0016021);;	--	--	--	Ankyrin repeats (3 copies)	--	Ankyrin repeat-containing-like protein isoform X2 OS=Cinnamomum micranthum f. kanehirae OX=337451 GN=CKAN_01399500 PE=4 SV=1	S	Function unknown	ankyrin repeat-containing-like protein isoform X2 [Cinnamomum micranthum f. kanehirae]
Phoebe_bournei_newGene_4054	--	--	Cellular Component: cellular_component (GO:0005575);; Cellular Component: intracellular (GO:0005622);; Cellular Component: obsolete cell (GO:0005623);; Cellular Component: nucleus (GO:0005634);; Cellular Component: nuclear envelope (GO:0005635);; Cellular Component: endomembrane system (GO:0012505);; Cellular Component: membrane (GO:0016020);; Cellular Component: organelle membrane (GO:0031090);;…	K20283|2.3e-11|ghi:107919752|K20283 golgin subfamily A member 4 | (RefSeq) putative leucine-rich repeat-containing protein DDB_G0290503	--	--	--	WPP domain-interacting tail-anchored protein 1 OS=Arabidopsis thaliana OX=3702 GN=WIT1 PE=1 SV=2	WPP domain-containing protein OS=Cinnamomum micranthum f. kanehirae OX=337451 GN=CKAN_01211700 PE=4 SV=1	S	Function unknown	WPP domain-containing protein [Cinnamomum micranthum f. kanehirae]
Phoebe_bournei_newGene_8499	--	--	Biological Process: reproduction (GO:0000003);; Biological Process: developmental process involved in reproduction (GO:0003006);; Molecular Function: molecular_function (GO:0003674);; Molecular Function: nucleic acid binding (GO:0003676);; Molecular Function: DNA binding (GO:0003677);; Molecular Function: chromatin binding (GO:0003682);; Molecular Function: DNA-binding transcription factor activi…	K11463|2.2e-11|brp:103867335|K11463 polycomb protein SUZ12 | (RefSeq) polycomb group protein FERTILIZATION-INDEPENDENT SEED 2	[R]	General function prediction only	VEFS-Box of polycomb protein	Polycomb group protein EMBRYONIC FLOWER 2 OS=Arabidopsis thaliana OX=3702 GN=EMF2 PE=1 SV=2	Polycomb group protein EMBRYONIC FLOWER 2-like protein isoform X4 OS=Cinnamomum micranthum f. kanehirae OX=337451 GN=CKAN_01882700 PE=3 SV=1	S	Function unknown	polycomb group protein EMBRYONIC FLOWER 2-like protein isoform X4 [Cinnamomum micranthum f. kanehirae]
Phoebe_bournei_newGene_806	--	--	Molecular Function: DNA binding (GO:0003677);; Biological Process: DNA-templated transcription, initiation (GO:0006352);; Biological Process: DNA integration (GO:0015074);;	K01768|3.6e-18|ghi:107911085|K01768 adenylate cyclase [EC:4.6.1.1] | (RefSeq) LOW QUALITY PROTEIN: uncharacterized protein LOC107911085	[R]	General function prediction only	Integrase core domain	--	Uncharacterized protein OS=Mikania micrantha OX=192012 GN=E3N88_27695 PE=3 SV=1	L	Replication, recombination and repair	hypothetical protein E3N88_31684 [Mikania micrantha]
Phoebe_bournei_newGene_3637	--	--	--	--	--	--	--	--	Uncharacterized protein OS=Cinnamomum micranthum f. kanehirae OX=337451 GN=CKAN_02760700 PE=4 SV=1	--	--	hypothetical protein CKAN_02760700 [Cinnamomum micranthum f. kanehirae]
Phoebe_bournei_newGene_212	--	--	Cellular Component: ubiquitin ligase complex (GO:0000151);; Molecular Function: molecular_function (GO:0003674);; Molecular Function: binding (GO:0005488);; Molecular Function: protein binding (GO:0005515);; Cellular Component: cellular_component (GO:0005575);; Cellular Component: intracellular (GO:0005622);; Cellular Component: obsolete cell (GO:0005623);; Cellular Component: nucleus (GO:0005634…	--	--	--	BTB/POZ domain	BTB/POZ domain-containing protein POB1 OS=Arabidopsis thaliana OX=3702 GN=POB1 PE=1 SV=2	BTB/POZ domain-containing protein POB1 isoform X1 OS=Cinnamomum micranthum f. kanehirae OX=337451 GN=CKAN_00888500 PE=4 SV=1	S	Function unknown	BTB/POZ domain-containing protein POB1 isoform X1 [Cinnamomum micranthum f. kanehirae]
Phoebe_bournei_newGene_4226	--	--	Molecular Function: DNA binding (GO:0003677);; Cellular Component: nucleus (GO:0005634);;	--	--	--	Williams-Beuren syndrome DDT (WSD), D-TOX E motif	Homeobox-DDT domain protein RLT3 OS=Arabidopsis thaliana OX=3702 GN=RLT3 PE=3 SV=1	Homeobox domain-containing protein OS=Cinnamomum micranthum f. kanehirae OX=337451 GN=CKAN_02233000 PE=4 SV=1	K	Transcription	Homeobox domain-containing protein [Cinnamomum micranthum f. kanehirae]
Phoebe_bournei_newGene_5614	--	--	--	--	--	--	--	--	Uncharacterized protein OS=Cinnamomum micranthum f. kanehirae OX=337451 GN=CKAN_02323800 PE=4 SV=1	E	Amino acid transport and metabolism	hypothetical protein CKAN_02323800 [Cinnamomum micranthum f. kanehirae]
Phoebe_bournei_newGene_9973	--	--	--	K01303|2.3e-54|fve:101311565|K01303 acylaminoacyl-peptidase [EC:3.4.19.1] | (RefSeq) uncharacterized LOC101311565	[R]	General function prediction only	Retrotransposon gag protein	--	Retrotrans_gag domain-containing protein OS=Mikania micrantha OX=192012 GN=E3N88_38555 PE=4 SV=1	L	Replication, recombination and repair	LOW QUALITY PROTEIN: uncharacterized protein LOC110412945 [Herrania umbratica]
Phoebe_bournei_newGene_9849	--	--	--	--	--	--	--	--	Uncharacterized protein OS=Cinnamomum micranthum f. kanehirae OX=337451 GN=CKAN_02720100 PE=4 SV=1	--	--	hypothetical protein CKAN_02720100 [Cinnamomum micranthum f. kanehirae]
Phoebe_bournei_newGene_10966	--	--	Molecular Function: protein binding (GO:0005515);;	--	--	--	Leucine Rich repeats (2 copies)	--	--	T	Signal transduction mechanisms	--
Phoebe_bournei_newGene_203	--	--	Molecular Function: molecular_function (GO:0003674);; Molecular Function: catalytic activity (GO:0003824);; Molecular Function: ubiquitin-protein transferase activity (GO:0004842);; Molecular Function: protein binding (GO:0005515);; Biological Process: cellular protein modification process (GO:0006464);; Biological Process: nitrogen compound metabolic process (GO:0006807);; Biological Process: mu…	--	--	--	F-box-like	F-box/kelch-repeat protein At3g61590 OS=Arabidopsis thaliana OX=3702 GN=At3g61590 PE=1 SV=1	F-box/kelch-repeat-like protein OS=Cinnamomum micranthum f. kanehirae OX=337451 GN=CKAN_02247600 PE=4 SV=1	S	Function unknown	F-box/kelch-repeat-like protein [Cinnamomum micranthum f. kanehirae]
Phoebe_bournei_newGene_9223	--	--	Molecular Function: molecular_function (GO:0003674);; Molecular Function: GTPase activator activity (GO:0005096);; Molecular Function: binding (GO:0005488);; Molecular Function: protein binding (GO:0005515);; Cellular Component: cellular_component (GO:0005575);; Cellular Component: extracellular region (GO:0005576);; Cellular Component: intracellular (GO:0005622);; Cellular Component: obsolete ce…	K20168|1.4e-38|ppp:112273166|K20168 TBC1 domain family member 15 | (RefSeq) GTPase-activating protein gyp7-like isoform X1	[T]	Signal transduction mechanisms	Rab-GTPase-TBC domain	Rab GTPase-activating protein 22 OS=Arabidopsis thaliana OX=3702 GN=RABGAP22 PE=1 SV=1	TBC1 domain-containing protein OS=Cinnamomum micranthum f. kanehirae OX=337451 GN=CKAN_02601500 PE=4 SV=1	T	Signal transduction mechanisms	TBC1 domain-containing protein [Cinnamomum micranthum f. kanehirae]
Phoebe_bournei_newGene_46	[J]	Translation, ribosomal structure and biogenesis	Molecular Function: magnesium ion binding (GO:0000287);; Molecular Function: GTP binding (GO:0005525);; Biological Process: tRNA modification (GO:0006400);; Molecular Function: tRNA guanylyltransferase activity (GO:0008193);;	K10761|7.1e-107|psom:113302343|K10761 tRNA(His) guanylyltransferase [EC:2.7.7.79] | (RefSeq) tRNA(His) guanylyltransferase 1	[S]	Function unknown	tRNAHis guanylyltransferase	tRNA(His) guanylyltransferase 1 OS=Arabidopsis thaliana OX=3702 GN=THG1 PE=1 SV=1	tRNA(His) guanylyltransferase OS=Cinnamomum micranthum f. kanehirae OX=337451 GN=CKAN_02497700 PE=3 SV=1	S	Function unknown	tRNAHis guanylyltransferase 1-like protein [Cinnamomum micranthum f. kanehirae]
Phoebe_bournei_newGene_1696	--	--	--	K01593|6.8e-25|mtr:MTR_7g058700|K01593 aromatic-L-amino-acid/L-tryptophan decarboxylase [EC:4.1.1.28 4.1.1.105] | (RefSeq) tyrosine/DOPA decarboxylase	--	--	Protein of unknown function (DUF674)	--	Uncharacterized protein OS=Cinnamomum micranthum f. kanehirae OX=337451 GN=CKAN_01263900 PE=4 SV=1	S	Function unknown	hypothetical protein CKAN_01263900 [Cinnamomum micranthum f. kanehirae]
Phoebe_bournei_newGene_9556	[I]	Lipid transport and metabolism	Biological Process: lipid metabolic process (GO:0006629);; Cellular Component: integral component of membrane (GO:0016021);; Molecular Function: oxidoreductase activity, acting on paired donors, with oxidation of a pair of donors resulting in the reduction of molecular oxygen to two molecules of water (GO:0016717);;	K10256|3.9e-186|nnu:104611778|K10256 omega-6 fatty acid desaturase / acyl-lipid omega-6 desaturase (Delta-12 desaturase) [EC:1.14.19.6 1.14.19.22] | (RefSeq) delta(12)-fatty-acid desaturase FAD2-like	--	--	Fatty acid desaturase	Delta(12)-fatty-acid desaturase FAD2 OS=Vernicia fordii OX=73154 GN=FAD2 PE=1 SV=1	Delta-12 fatty acid desaturase OS=Persea americana OX=3435 PE=2 SV=1	I	Lipid transport and metabolism	delta-12 fatty acid desaturase [Persea americana]
Phoebe_bournei_newGene_8332	--	--	Molecular Function: tRNA binding (GO:0000049);; Molecular Function: tRNA (guanine-N2-)-methyltransferase activity (GO:0004809);;	--	--	--	--	--	tRNA (guanine(26)-N(2))-dimethyltransferase OS=Cinnamomum micranthum f. kanehirae OX=337451 GN=CKAN_01735800 PE=3 SV=1	--	--	tRNA guanine26-N2-dimethyltransferase [Cinnamomum micranthum f. kanehirae]
Phoebe_bournei_newGene_4986	[G]	Carbohydrate transport and metabolism	Cellular Component: integral component of membrane (GO:0016021);; Molecular Function: transmembrane transporter activity (GO:0022857);;	K08150|1.1e-64|nau:109218122|K08150 MFS transporter, SP family, solute carrier family 2 (myo-inositol transporter), member 13 | (RefSeq) inositol transporter 1	[R]	General function prediction only	Sugar (and other) transporter	Putative polyol transporter 1 OS=Arabidopsis thaliana OX=3702 GN=PLT1 PE=3 SV=1	Polyol transporter 5-like protein OS=Cinnamomum micranthum f. kanehirae OX=337451 GN=CKAN_02628100 PE=3 SV=1	U	Intracellular trafficking, secretion, and vesicular transport	polyol transporter 5-like protein [Cinnamomum micranthum f. kanehirae]
Phoebe_bournei_newGene_10553	[A]	RNA processing and modification	Molecular Function: RNA binding (GO:0003723);; Molecular Function: polynucleotide adenylyltransferase activity (GO:0004652);; Biological Process: RNA 3'-end processing (GO:0031123);; Biological Process: RNA polyadenylation (GO:0043631);;	K14376|3.3e-186|nnu:104604476|K14376 poly(A) polymerase [EC:2.7.7.19] | (RefSeq) nuclear poly(A) polymerase 4-like	[A]	RNA processing and modification	Poly(A) polymerase central domain	Nuclear poly(A) polymerase 4 OS=Arabidopsis thaliana OX=3702 GN=PAPS4 PE=1 SV=1	Polynucleotide adenylyltransferase OS=Nelumbo nucifera OX=4432 GN=LOC104604476 PE=3 SV=1	A	RNA processing and modification	PREDICTED: nuclear poly(A) polymerase 4-like isoform X2 [Nelumbo nucifera]
Phoebe_bournei_newGene_639	--	--	Cellular Component: cellular_component (GO:0005575);; Cellular Component: intracellular (GO:0005622);; Cellular Component: obsolete cell (GO:0005623);; Cellular Component: nucleus (GO:0005634);; Cellular Component: cytoplasm (GO:0005737);; Cellular Component: endoplasmic reticulum (GO:0005783);; Biological Process: biological_process (GO:0008150);; Biological Process: positive regulation of cell …	--	--	--	--	--	Uncharacterized protein OS=Citrus clementina OX=85681 GN=CICLE_v10022861mg PE=3 SV=1	S	Function unknown	protein AUXIN-REGULATED GENE INVOLVED IN ORGAN SIZE [Citrus sinensis]
Phoebe_bournei_newGene_2	[T]	Signal transduction mechanisms	Molecular Function: protein kinase activity (GO:0004672);; Molecular Function: ATP binding (GO:0005524);; Cellular Component: integral component of membrane (GO:0016021);;	K13415|1.6e-62|han:110929858|K13415 protein brassinosteroid insensitive 1 [EC:2.7.10.1 2.7.11.1] | (RefSeq) systemin receptor SR160-like	--	--	Protein kinase domain	MDIS1-interacting receptor like kinase 2 OS=Arabidopsis thaliana OX=3702 GN=MIK2 PE=1 SV=3	MDIS1-interacting receptor like kinase 2-like protein OS=Cinnamomum micranthum f. kanehirae OX=337451 GN=CKAN_02702900 PE=4 SV=1	T	Signal transduction mechanisms	MDIS1-interacting receptor like kinase 2-like protein [Cinnamomum micranthum f. kanehirae]
Phoebe_bournei_newGene_8587	[T]	Signal transduction mechanisms	Molecular Function: protein kinase activity (GO:0004672);; Molecular Function: ATP binding (GO:0005524);; Cellular Component: integral component of membrane (GO:0016021);; Molecular Function: carbohydrate binding (GO:0030246);;	K22133|5.0e-34|egr:104443802|K22133 oxalate---CoA ligase [EC:6.2.1.8] | (RefSeq) oxalate--CoA ligase	--	--	Legume lectin domain	L-type lectin-domain containing receptor kinase IV.1 OS=Arabidopsis thaliana OX=3702 GN=LECRK41 PE=2 SV=1	L-type lectin-domain-containing protein OS=Cinnamomum micranthum f. kanehirae OX=337451 GN=CKAN_00524200 PE=3 SV=1	T	Signal transduction mechanisms	L-type lectin-domain-containing protein [Cinnamomum micranthum f. kanehirae]
Phoebe_bournei_newGene_6742	[Q]	Secondary metabolites biosynthesis, transport and catabolism	--	--	--	--	alpha/beta hydrolase fold	Strigolactone esterase D14 OS=Oryza sativa subsp. japonica OX=39947 GN=D14 PE=1 SV=1	Strigolactone esterase D14-like protein OS=Cinnamomum micranthum f. kanehirae OX=337451 GN=CKAN_00598600 PE=4 SV=1	S	Function unknown	strigolactone esterase D14-like protein [Cinnamomum micranthum f. kanehirae]
Phoebe_bournei_newGene_4812	--	--	Cellular Component: cellular_component (GO:0005575);; Cellular Component: intracellular (GO:0005622);; Cellular Component: obsolete cell (GO:0005623);; Cellular Component: cytoplasm (GO:0005737);; Cellular Component: obsolete intracellular part (GO:0044424);; Cellular Component: obsolete cell part (GO:0044464);;	K01803|7.5e-15|sbi:8057784|K01803 triosephosphate isomerase (TIM) [EC:5.3.1.1] | (RefSeq) triosephosphate isomerase, cytosolic	[R]	General function prediction only	C2 domain	16 kDa phloem protein 2 OS=Arabidopsis thaliana OX=3702 GN=PP16-2 PE=1 SV=1	Elicitor-responsive protein 3 isoform X1 OS=Cinnamomum micranthum f. kanehirae OX=337451 GN=CKAN_00036400 PE=4 SV=1	S	Function unknown	elicitor-responsive protein 3 isoform X1 [Cinnamomum micranthum f. kanehirae]
Phoebe_bournei_newGene_3098	--	--	Molecular Function: protein serine/threonine kinase activity (GO:0004674);; Molecular Function: calcium ion binding (GO:0005509);; Molecular Function: ATP binding (GO:0005524);; Cellular Component: integral component of membrane (GO:0016021);; Molecular Function: polysaccharide binding (GO:0030247);;	--	--	--	Calcium-binding EGF domain	--	Putative ATP binding protein OS=Cinnamomum micranthum f. kanehirae OX=337451 GN=CKAN_00752500 PE=4 SV=1	--	--	putative ATP binding protein [Cinnamomum micranthum f. kanehirae]
Phoebe_bournei_newGene_4139	--	--	Molecular Function: DNA binding (GO:0003677);; Cellular Component: nucleus (GO:0005634);;	--	[O]	Posttranslational modification, protein turnover, chaperones	Myb-like DNA-binding domain	Transcription factor DIVARICATA OS=Antirrhinum majus OX=4151 GN=DIVARICATA PE=2 SV=1	Transcription factor DIVARICATA isoform X1 OS=Cinnamomum micranthum f. kanehirae OX=337451 GN=CKAN_01023800 PE=4 SV=1	K	Transcription	transcription factor DIVARICATA isoform X1 [Cinnamomum micranthum f. kanehirae]
Phoebe_bournei_newGene_12218	--	--	Molecular Function: nucleic acid binding (GO:0003676);;	K08775|7.6e-22|oeu:111406546|K08775 breast cancer 2 susceptibility protein | (RefSeq) protein BREAST CANCER SUSCEPTIBILITY 2 homolog B-like	--	--	Integrase zinc binding domain	--	Uncharacterized protein OS=Vitis vinifera OX=29760 GN=CK203_106734 PE=4 SV=1	S	Function unknown	uncharacterized protein LOC111987139 [Quercus suber]
Phoebe_bournei_newGene_1074	--	--	--	K11372|8.7e-98|pavi:110753031|K11372 HAT1-interacting factor 1 | (RefSeq) protein HGV2	[BD]	--	Tetratricopeptide repeat	--	Nuclear autoantigenic sperm protein OS=Cinnamomum micranthum f. kanehirae OX=337451 GN=CKAN_00254100 PE=3 SV=1	--	--	nuclear autoantigenic sperm protein [Cinnamomum micranthum f. kanehirae]
Phoebe_bournei_newGene_9574	[P]	Inorganic ion transport and metabolism	Biological Process: potassium ion transport (GO:0006813);; Molecular Function: solute:proton antiporter activity (GO:0015299);; Cellular Component: integral component of membrane (GO:0016021);;	--	[P]	Inorganic ion transport and metabolism	Sodium/hydrogen exchanger family	K(+) efflux antiporter 3, chloroplastic OS=Arabidopsis thaliana OX=3702 GN=KEA3 PE=1 SV=2	K+ efflux antiporter 3, chloroplastic OS=Cinnamomum micranthum f. kanehirae OX=337451 GN=CKAN_00639600 PE=4 SV=1	P	Inorganic ion transport and metabolism	K+ efflux antiporter 3, chloroplastic [Cinnamomum micranthum f. kanehirae]
Phoebe_bournei_newGene_7941	--	--	Molecular Function: protein kinase activity (GO:0004672);; Molecular Function: ATP binding (GO:0005524);; Cellular Component: integral component of membrane (GO:0016021);;	K13415|1.7e-16|han:110929858|K13415 protein brassinosteroid insensitive 1 [EC:2.7.10.1 2.7.11.1] | (RefSeq) systemin receptor SR160-like	--	--	Protein tyrosine and serine/threonine kinase	MDIS1-interacting receptor like kinase 2 OS=Arabidopsis thaliana OX=3702 GN=MIK2 PE=1 SV=3	Protein kinase domain-containing protein OS=Cinnamomum micranthum f. kanehirae OX=337451 GN=CKAN_02702500 PE=4 SV=1	T	Signal transduction mechanisms	Protein kinase domain-containing protein [Cinnamomum micranthum f. kanehirae]
Phoebe_bournei_newGene_2379	--	--	Molecular Function: kinase activity (GO:0016301);;	K00326|7.0e-11|ccav:112516820|K00326 cytochrome-b5 reductase [EC:1.6.2.2] | (RefSeq) NADH-cytochrome b5 reductase-like protein	--	--	Domain of unknown function (DUF4666)	Uncharacterized protein At1g15400 OS=Arabidopsis thaliana OX=3702 GN=At1g15400 PE=1 SV=2	MAPK kinase substrate-like protein OS=Cinnamomum micranthum f. kanehirae OX=337451 GN=CKAN_00158300 PE=4 SV=1	S	Function unknown	MAPK kinase substrate-like protein [Cinnamomum micranthum f. kanehirae]
Phoebe_bournei_newGene_10219	--	--	Biological Process: cell morphogenesis (GO:0000902);;	--	[R]	General function prediction only	Cell morphogenesis central region	--	Protein furry-like protein OS=Cinnamomum micranthum f. kanehirae OX=337451 GN=CKAN_01958200 PE=4 SV=1	L	Replication, recombination and repair	protein furry-like protein [Cinnamomum micranthum f. kanehirae]
Phoebe_bournei_newGene_6531	--	--	Cellular Component: nucleus (GO:0005634);; Biological Process: regulation of transcription, DNA-templated (GO:0006355);; Molecular Function: lipid binding (GO:0008289);; Molecular Function: sequence-specific DNA binding (GO:0043565);;	K09338|8.7e-28|ccaj:109804547|K09338 homeobox-leucine zipper protein | (RefSeq) homeobox-leucine zipper protein HDG11-like	--	--	START domain	Homeobox-leucine zipper protein ROC8 OS=Oryza sativa subsp. japonica OX=39947 GN=ROC8 PE=2 SV=2	Homeobox-leucine zipper protein HDG11-like protein isoform X1 OS=Cinnamomum micranthum f. kanehirae OX=337451 GN=CKAN_00349500 PE=3 SV=1	K	Transcription	homeobox-leucine zipper protein HDG11-like protein isoform X1 [Cinnamomum micranthum f. kanehirae]
Phoebe_bournei_newGene_10268	--	--	Molecular Function: protein serine/threonine kinase activity (GO:0004674);; Molecular Function: ATP binding (GO:0005524);; Cellular Component: integral component of membrane (GO:0016021);; Biological Process: recognition of pollen (GO:0048544);;	--	--	--	PAN-like domain	--	Protein kinase domain-containing protein OS=Cinnamomum micranthum f. kanehirae OX=337451 GN=CKAN_01709700 PE=4 SV=1	T	Signal transduction mechanisms	Protein kinase domain-containing protein [Cinnamomum micranthum f. kanehirae]
Phoebe_bournei_newGene_5734	[G]	Carbohydrate transport and metabolism	Molecular Function: ATP binding (GO:0005524);; Biological Process: D-gluconate catabolic process (GO:0046177);; Molecular Function: gluconokinase activity (GO:0046316);;	K00851|9.5e-60|qsu:111986826|K00851 gluconokinase [EC:2.7.1.12] | (RefSeq) gluconokinase isoform X1	[G]	Carbohydrate transport and metabolism	Shikimate kinase	Gluconokinase OS=Arabidopsis thaliana OX=3702 GN=At2g16790 PE=2 SV=2	Gluconokinase OS=Cinnamomum micranthum f. kanehirae OX=337451 GN=CKAN_01576200 PE=3 SV=1	F	Nucleotide transport and metabolism	putative gluconokinase [Cinnamomum micranthum f. kanehirae]
Phoebe_bournei_newGene_8500	[R]	General function prediction only	Molecular Function: GTPase activity (GO:0003924);; Molecular Function: GTP binding (GO:0005525);;	K07874|9.6e-107|vvi:100248422|K07874 Ras-related protein Rab-1A | (RefSeq) GTP-binding protein YPTM2	[TU]	--	Ras family	Ras-related protein RABD2a OS=Arabidopsis thaliana OX=3702 GN=RABD2A PE=1 SV=3	GTP-binding protein YPTM2 OS=Cinnamomum micranthum f. kanehirae OX=337451 GN=CKAN_01882600 PE=4 SV=1	U	Intracellular trafficking, secretion, and vesicular transport	GTP-binding protein YPTM2 [Cinnamomum micranthum f. kanehirae]
Phoebe_bournei_newGene_1210	[R]	General function prediction only	Molecular Function: methyltransferase activity (GO:0008168);; Cellular Component: PcG protein complex (GO:0031519);; Biological Process: methylation (GO:0032259);;	K11430|0.0e+00|cmo:103497371|K11430 [histone H3]-lysine27 N-trimethyltransferase EZH2 [EC:2.1.1.356] | (RefSeq) histone-lysine N-methyltransferase CLF	[K]	Transcription	SET domain	Histone-lysine N-methyltransferase CLF OS=Oryza sativa subsp. japonica OX=39947 GN=CLF PE=1 SV=1	Histone-lysine N-methyltransferase CLF-like protein isoform X1 OS=Cinnamomum micranthum f. kanehirae OX=337451 GN=CKAN_01175100 PE=4 SV=1	K	Transcription	histone-lysine N-methyltransferase CLF-like protein isoform X1 [Cinnamomum micranthum f. kanehirae]
Phoebe_bournei_newGene_9555	[I]	Lipid transport and metabolism	Biological Process: lipid metabolic process (GO:0006629);; Cellular Component: integral component of membrane (GO:0016021);; Molecular Function: oxidoreductase activity, acting on paired donors, with oxidation of a pair of donors resulting in the reduction of molecular oxygen to two molecules of water (GO:0016717);;	K10256|3.1e-183|nnu:104611778|K10256 omega-6 fatty acid desaturase / acyl-lipid omega-6 desaturase (Delta-12 desaturase) [EC:1.14.19.6 1.14.19.22] | (RefSeq) delta(12)-fatty-acid desaturase FAD2-like	--	--	Fatty acid desaturase	Delta(12)-fatty-acid desaturase FAD2 OS=Vernicia fordii OX=73154 GN=FAD2 PE=1 SV=1	Delta-12 fatty acid desaturase OS=Persea americana OX=3435 PE=2 SV=1	I	Lipid transport and metabolism	delta-12 fatty acid desaturase [Persea americana]
Phoebe_bournei_newGene_9839	[J]	Translation, ribosomal structure and biogenesis	Molecular Function: RNA binding (GO:0003723);;	K14325|8.7e-56|nnu:104606924|K14325 RNA-binding protein with serine-rich domain 1 | (RefSeq) serine/arginine-rich splicing factor SR45	[R]	General function prediction only	RNA recognition motif. (a.k.a. RRM, RBD, or RNP domain)	Serine/arginine-rich splicing factor SR45 OS=Arabidopsis thaliana OX=3702 GN=SR45 PE=1 SV=1	serine/arginine-rich splicing factor SR45-like isoform X2 OS=Phoenix dactylifera OX=42345 GN=LOC103704825 PE=4 SV=1	A	RNA processing and modification	serine/arginine-rich splicing factor SR45-like isoform X2 [Phoenix dactylifera]
Phoebe_bournei_newGene_2204	--	--	Molecular Function: protein kinase activity (GO:0004672);; Molecular Function: ATP binding (GO:0005524);;	--	--	--	--	--	Protein kinase domain-containing protein OS=Cinnamomum micranthum f. kanehirae OX=337451 GN=CKAN_02275800 PE=4 SV=1	--	--	Protein kinase domain-containing protein [Cinnamomum micranthum f. kanehirae]
Phoebe_bournei_newGene_2154	--	--	--	--	--	--	--	--	Transpos_assoc domain-containing protein OS=Cinnamomum micranthum f. kanehirae OX=337451 GN=CKAN_00569900 PE=4 SV=1	--	--	hypothetical protein CKAN_00569900 [Cinnamomum micranthum f. kanehirae]
Phoebe_bournei_newGene_9940	--	--	Molecular Function: RNA-directed DNA polymerase activity (GO:0003964);; Cellular Component: integral component of membrane (GO:0016021);;	--	--	--	zinc-binding in reverse transcriptase	--	Reverse transcriptase zinc-binding domain-containing protein OS=Cinnamomum micranthum f. kanehirae OX=337451 GN=CKAN_00346400 PE=4 SV=1	E	Amino acid transport and metabolism	Reverse transcriptase zinc-binding domain-containing protein [Cinnamomum micranthum f. kanehirae]
Phoebe_bournei_newGene_8251	--	--	--	--	--	--	--	--	F-box/FBD/LRR-repeat-like protein isoform X1 OS=Cinnamomum micranthum f. kanehirae OX=337451 GN=CKAN_02386300 PE=4 SV=1	--	--	F-box/FBD/LRR-repeat-like protein isoform X1 [Cinnamomum micranthum f. kanehirae]
Phoebe_bournei_newGene_3878	--	--	Biological Process: phosphatidylserine biosynthetic process (GO:0006659);; Cellular Component: integral component of membrane (GO:0016021);; Molecular Function: transferase activity (GO:0016740);;	K08730|4.5e-166|nnu:104613331|K08730 phosphatidylserine synthase 2 [EC:2.7.8.29] | (RefSeq) CDP-diacylglycerol--serine O-phosphatidyltransferase 1	[I]	Lipid transport and metabolism	Phosphatidyl serine synthase	CDP-diacylglycerol--serine O-phosphatidyltransferase 1 OS=Oryza sativa subsp. japonica OX=39947 GN=PSS1 PE=2 SV=2	CDP-diacylglycerol--serine O-phosphatidyltransferase 1 isoform X1 OS=Cinnamomum micranthum f. kanehirae OX=337451 GN=CKAN_02319900 PE=4 SV=1	I	Lipid transport and metabolism	CDP-diacylglycerol--serine O-phosphatidyltransferase 1 isoform X1 [Cinnamomum micranthum f. kanehirae]
Phoebe_bournei_newGene_10705	--	--	Molecular Function: protein kinase activity (GO:0004672);; Molecular Function: ATP binding (GO:0005524);; Cellular Component: integral component of membrane (GO:0016021);; Molecular Function: carbohydrate binding (GO:0030246);;	--	--	--	Legume lectin domain	L-type lectin-domain containing receptor kinase V.9 OS=Arabidopsis thaliana OX=3702 GN=LECRK59 PE=2 SV=1	L-type lectin-domain containing receptor kinase IV.1-like OS=Nelumbo nucifera OX=4432 GN=LOC104601078 PE=3 SV=1	T	Signal transduction mechanisms	L-type lectin-domain containing receptor kinase IV.2-like [Cucumis sativus]
Phoebe_bournei_newGene_4937	--	--	Molecular Function: serine-type endopeptidase activity (GO:0004252);;	--	--	--	--	Subtilisin-like protease SBT3.2 OS=Arabidopsis thaliana OX=3702 GN=SBT3.2 PE=2 SV=1	Peptidase S8/S53 domain-containing protein OS=Cinnamomum micranthum f. kanehirae OX=337451 GN=CKAN_01541900 PE=3 SV=1	O	Posttranslational modification, protein turnover, chaperones	Peptidase S8/S53 domain-containing protein [Cinnamomum micranthum f. kanehirae]
Phoebe_bournei_newGene_52	--	--	Biological Process: regulation of transcription, DNA-templated (GO:0006355);; Molecular Function: histone binding (GO:0042393);; Molecular Function: metal ion binding (GO:0046872);;	K24083|1.7e-73|dzi:111284751|K24083 abhydrolase domain-containing protein 13 [EC:3.-.-.-] | (RefSeq) protein bem46-like isoform X1	[R]	General function prediction only	Alfin	PHD finger protein ALFIN-LIKE 1 OS=Arabidopsis thaliana OX=3702 GN=AL1 PE=1 SV=1	PHD finger protein ALFIN-LIKE 1-like protein OS=Cinnamomum micranthum f. kanehirae OX=337451 GN=CKAN_02496800 PE=3 SV=1	S	Function unknown	PHD finger protein ALFIN-LIKE 1-like protein [Cinnamomum micranthum f. kanehirae]
Phoebe_bournei_newGene_12974	--	--	Molecular Function: RNA binding (GO:0003723);; Cellular Component: nucleus (GO:0005634);;	--	[A]	RNA processing and modification	--	Protein RIK OS=Zea mays OX=4577 PE=1 SV=1	Protein RIK isoform X1 OS=Cinnamomum micranthum f. kanehirae OX=337451 GN=CKAN_00568400 PE=4 SV=1	A	RNA processing and modification	protein RIK isoform X1 [Cinnamomum micranthum f. kanehirae]
Phoebe_bournei_newGene_11358	[C]	Energy production and conversion	Molecular Function: malate dehydrogenase (decarboxylating) (NAD+) activity (GO:0004471);; Molecular Function: metal ion binding (GO:0046872);; Molecular Function: NAD binding (GO:0051287);;	K00028|7.2e-31|ccav:112526692|K00028 malate dehydrogenase (decarboxylating) [EC:1.1.1.39] | (RefSeq) NAD-dependent malic enzyme 59 kDa isoform, mitochondrial	[C]	Energy production and conversion	Malic enzyme, N-terminal domain	NAD-dependent malic enzyme 2, mitochondrial OS=Arabidopsis thaliana OX=3702 GN=NAD-ME2 PE=1 SV=1	Malic enzyme OS=Cinnamomum micranthum f. kanehirae OX=337451 GN=CKAN_02110100 PE=3 SV=1	C	Energy production and conversion	Malic oxidoreductase [Cinnamomum micranthum f. kanehirae]
Phoebe_bournei_newGene_936	[U]	Intracellular trafficking, secretion, and vesicular transport	Biological Process: defense response (GO:0006952);; Molecular Function: ADP binding (GO:0043531);;	K15078|9.2e-164|tcc:18614561|K15078 structure-specific endonuclease subunit SLX1 [EC:3.6.1.-] | (RefSeq) putative disease resistance protein RGA3	[T]	Signal transduction mechanisms	NB-ARC domain	Putative disease resistance protein RGA3 OS=Solanum bulbocastanum OX=147425 GN=RGA3 PE=2 SV=2	Putative disease resistance protein RGA1 OS=Cinnamomum micranthum f. kanehirae OX=337451 GN=CKAN_00310800 PE=4 SV=1	T	Signal transduction mechanisms	putative disease resistance protein RGA1 [Cinnamomum micranthum f. kanehirae]
Phoebe_bournei_newGene_7465	--	--	Biological Process: metal ion transport (GO:0030001);; Molecular Function: metal ion binding (GO:0046872);;	K11883|2.0e-08|nau:109216591|K11883 RNA-binding protein NOB1 | (RefSeq) RNA-binding protein NOB1 isoform X1	[P]	Inorganic ion transport and metabolism	Heavy-metal-associated domain	Heavy metal-associated isoprenylated plant protein 39 OS=Arabidopsis thaliana OX=3702 GN=HIPP39 PE=2 SV=1	FK506-binding protein 4-like protein OS=Cinnamomum micranthum f. kanehirae OX=337451 GN=CKAN_01854500 PE=4 SV=1	P	Inorganic ion transport and metabolism	FK506-binding protein 4-like protein [Cinnamomum micranthum f. kanehirae]
Phoebe_bournei_newGene_1151	--	--	--	--	--	--	--	--	Uncharacterized protein OS=Cinnamomum micranthum f. kanehirae OX=337451 GN=CKAN_00888200 PE=4 SV=1	--	--	hypothetical protein CKAN_00888200 [Cinnamomum micranthum f. kanehirae]
Phoebe_bournei_newGene_6547	--	--	Biological Process: protein polyubiquitination (GO:0000209);; Molecular Function: molecular_function (GO:0003674);; Molecular Function: catalytic activity (GO:0003824);; Molecular Function: ubiquitin-protein transferase activity (GO:0004842);; Cellular Component: cellular_component (GO:0005575);; Cellular Component: intracellular (GO:0005622);; Cellular Component: obsolete cell (GO:0005623);; Cel…	K10268|4.0e-69|nnu:104588526|K10268 F-box and leucine-rich repeat protein 2/20 | (RefSeq) F-box/LRR-repeat protein 2	[R]	General function prediction only	Leucine Rich repeats (2 copies)	--	F-box/LRR-repeat protein 2 OS=Cinnamomum micranthum f. kanehirae OX=337451 GN=CKAN_00387900 PE=4 SV=1	S	Function unknown	F-box/LRR-repeat protein 2 [Cinnamomum micranthum f. kanehirae]
Phoebe_bournei_newGene_7468	--	--	Cellular Component: integral component of membrane (GO:0016021);;	--	--	--	--	--	uncharacterized protein LOC104585793 isoform X1 OS=Nelumbo nucifera OX=4432 GN=LOC104585793 PE=4 SV=1	S	Function unknown	uncharacterized protein LOC105059496 isoform X1 [Elaeis guineensis]
Phoebe_bournei_newGene_9679	--	--	Molecular Function: structural constituent of ribosome (GO:0003735);; Biological Process: translation (GO:0006412);; Cellular Component: cytosolic small ribosomal subunit (GO:0022627);;	K02983|5.1e-27|adu:107485982|K02983 small subunit ribosomal protein S30e | (RefSeq) 40S ribosomal protein S30	[JO]	--	Ribosomal protein S30	40S ribosomal protein S30 OS=Arabidopsis thaliana OX=3702 GN=RPS30A PE=3 SV=3	40S ribosomal protein S30 OS=Sorghum bicolor OX=4558 GN=SORBI_3004G335600 PE=3 SV=1	--	--	hypothetical protein CICLE_v10009868mg [Citrus clementina]
Phoebe_bournei_newGene_12816	[Q]	Secondary metabolites biosynthesis, transport and catabolism	Molecular Function: oxidoreductase activity (GO:0016491);; Molecular Function: metal ion binding (GO:0046872);;	K24028|8.6e-90|lja:Lj0g3v0213339.1|K24028 salicylic acid 3-hydroxylase [EC:1.14.11.-] | (RefSeq) Lj0g3v0213339.1; -	[QR]	--	2OG-Fe(II) oxygenase superfamily	2-oxoglutarate-dependent dioxygenase 19 OS=Oryza sativa subsp. japonica OX=39947 GN=2ODD19 PE=1 SV=1	Isopenicillin N synthase OS=Cinnamomum micranthum f. kanehirae OX=337451 GN=CKAN_01289000 PE=3 SV=1	Q	Secondary metabolites biosynthesis, transport and catabolism	Isopenicillin N synthase [Cinnamomum micranthum f. kanehirae]
Phoebe_bournei_newGene_11583	--	--	--	--	--	--	Protein of unknown function (DUF1668)	--	Uncharacterized protein OS=Cinnamomum micranthum f. kanehirae OX=337451 GN=CKAN_02363800 PE=4 SV=1	--	--	hypothetical protein CKAN_02363800 [Cinnamomum micranthum f. kanehirae]
Phoebe_bournei_newGene_5371	--	--	Molecular Function: DNA binding (GO:0003677);; Cellular Component: nucleus (GO:0005634);; Biological Process: regulation of transcription, DNA-templated (GO:0006355);;	--	--	--	--	--	NAC domain-containing protein 35-like protein OS=Cinnamomum micranthum f. kanehirae OX=337451 GN=CKAN_01970500 PE=4 SV=1	K	Transcription	NAC domain-containing protein 35-like protein [Cinnamomum micranthum f. kanehirae]
Phoebe_bournei_newGene_8121	--	--	Cellular Component: nucleus (GO:0005634);; Biological Process: regulation of transcription, DNA-templated (GO:0006355);; Molecular Function: zinc ion binding (GO:0008270);;	K17604|4.7e-08|dcr:108207429|K17604 zinc finger SWIM domain-containing protein 3 | (RefSeq) protein FAR1-RELATED SEQUENCE 5-like	--	--	FAR1 DNA-binding domain	--	Protein FAR1-RELATED SEQUENCE OS=Cinnamomum micranthum f. kanehirae OX=337451 GN=CKAN_00701600 PE=3 SV=1	S	Function unknown	protein FAR1-RELATED SEQUENCE 5-like protein [Cinnamomum micranthum f. kanehirae]
Phoebe_bournei_newGene_9283	--	--	Molecular Function: protein kinase activity (GO:0004672);; Molecular Function: ATP binding (GO:0005524);;	--	--	--	Plant transposase (Ptta/En/Spm family)	--	Transposase OS=Cinnamomum micranthum f. kanehirae OX=337451 GN=CKAN_01728100 PE=4 SV=1	S	Function unknown	transposase [Cinnamomum micranthum f. kanehirae]
Phoebe_bournei_newGene_12438	--	--	Cellular Component: integral component of membrane (GO:0016021);;	--	--	--	--	FT-interacting protein 1 OS=Arabidopsis thaliana OX=3702 GN=FTIP1 PE=1 SV=1	FT-interacting protein 1-like protein OS=Cinnamomum micranthum f. kanehirae OX=337451 GN=CKAN_00630600 PE=3 SV=1	S	Function unknown	FT-interacting protein 1-like protein [Cinnamomum micranthum f. kanehirae]
Phoebe_bournei_newGene_9740	--	--	Molecular Function: protein serine/threonine kinase activity (GO:0004674);; Molecular Function: ATP binding (GO:0005524);; Cellular Component: integral component of membrane (GO:0016021);;	K16224|1.0e-11|boe:106304564|K16224 senescence-induced receptor-like serine/threonine-protein kinase | (RefSeq) senescence-induced receptor-like serine/threonine-protein kinase	--	--	Protein tyrosine and serine/threonine kinase	Probable LRR receptor-like serine/threonine-protein kinase At4g29180 OS=Arabidopsis thaliana OX=3702 GN=At4g29180 PE=1 SV=2	Putative LRR receptor-like serine/threonine-protein kinase OS=Cinnamomum micranthum f. kanehirae OX=337451 GN=CKAN_00669300 PE=3 SV=1	T	Signal transduction mechanisms	putative LRR receptor-like serine/threonine-protein kinase [Cinnamomum micranthum f. kanehirae]
Phoebe_bournei_newGene_3987	[P]	Inorganic ion transport and metabolism	Molecular Function: potassium ion transmembrane transporter activity (GO:0015079);; Cellular Component: integral component of membrane (GO:0016021);;	K03549|4.9e-227|nnu:104593241|K03549 KUP system potassium uptake protein | (RefSeq) potassium transporter 6-like	--	--	K+ potassium transporter	Potassium transporter 6 OS=Arabidopsis thaliana OX=3702 GN=POT6 PE=2 SV=1	Potassium transporter OS=Cinnamomum micranthum f. kanehirae OX=337451 GN=CKAN_00555300 PE=3 SV=1	P	Inorganic ion transport and metabolism	potassium transporter 6-like protein [Cinnamomum micranthum f. kanehirae]
Phoebe_bournei_newGene_903	[O]	Posttranslational modification, protein turnover, chaperones	Molecular Function: metalloendopeptidase activity (GO:0004222);; Molecular Function: metal ion binding (GO:0046872);;	K01411|0.0e+00|pda:103702128|K01411 nardilysin [EC:3.4.24.61] | (RefSeq) nardilysin-like isoform X1	[O]	Posttranslational modification, protein turnover, chaperones	Middle or third domain of peptidase_M16	Nardilysin-like OS=Arabidopsis thaliana OX=3702 GN=At1g06900 PE=2 SV=1	Nardilysin-like protein isoform X1 OS=Cinnamomum micranthum f. kanehirae OX=337451 GN=CKAN_00911400 PE=3 SV=1	O	Posttranslational modification, protein turnover, chaperones	nardilysin-like protein isoform X1 [Cinnamomum micranthum f. kanehirae]
Phoebe_bournei_newGene_7619	--	--	Biological Process: ribosomal large subunit assembly (GO:0000027);; Molecular Function: ATP binding (GO:0005524);; Cellular Component: nucleus (GO:0005634);; Molecular Function: ATPase activity (GO:0016887);;	K14572|1.6e-12|egu:105053627|K14572 midasin | (RefSeq) midasin	[R]	General function prediction only	--	Midasin OS=Arabidopsis thaliana OX=3702 GN=MDN1 PE=1 SV=1	Midasin OS=Cinnamomum micranthum f. kanehirae OX=337451 GN=CKAN_01486700 PE=3 SV=1	S	Function unknown	von Willebrand factor [Cinnamomum micranthum f. kanehirae]
Phoebe_bournei_newGene_13371	--	--	--	--	--	--	--	--	Uncharacterized protein OS=Cinnamomum micranthum f. kanehirae OX=337451 GN=CKAN_01713200 PE=4 SV=1	--	--	hypothetical protein CKAN_01713200 [Cinnamomum micranthum f. kanehirae]
Phoebe_bournei_newGene_4491	[J]	Translation, ribosomal structure and biogenesis	Molecular Function: structural constituent of ribosome (GO:0003735);; Cellular Component: ribosome (GO:0005840);; Biological Process: translation (GO:0006412);;	K02919|7.5e-31|pda:103706747|K02919 large subunit ribosomal protein L36 | (RefSeq) uncharacterized protein LOC103706747	[J]	Translation, ribosomal structure and biogenesis	Ribosomal protein L36	50S ribosomal protein L36, chloroplastic OS=Mesostigma viride OX=41882 GN=rpl36 PE=3 SV=1	Ribosomal protein OS=Cinnamomum micranthum f. kanehirae OX=337451 GN=CKAN_02657800 PE=3 SV=1	J	Translation, ribosomal structure and biogenesis	50S ribosomal protein L36 [Cinnamomum micranthum f. kanehirae]
Phoebe_bournei_newGene_3467	[L]	Replication, recombination and repair	Molecular Function: magnesium ion binding (GO:0000287);; Molecular Function: DNA binding (GO:0003677);; Cellular Component: nucleoplasm (GO:0005654);; Cellular Component: nucleolus (GO:0005730);; Cellular Component: mitochondrion (GO:0005739);; Biological Process: DNA replication (GO:0006260);; Biological Process: base-excision repair (GO:0006284);; Molecular Function: 5'-3' exonuclease activity …	K04799|3.4e-116|pmum:103344521|K04799 flap endonuclease-1 [EC:3.-.-.-] | (RefSeq) flap endonuclease 1 isoform X1	[L]	Replication, recombination and repair	XPG I-region	Flap endonuclease 1 OS=Glycine max OX=3847 GN=FEN1 PE=2 SV=1	Flap endonuclease 1 OS=Cinnamomum micranthum f. kanehirae OX=337451 GN=FEN1 PE=3 SV=1	L	Replication, recombination and repair	flap endonuclease 1-like protein [Cinnamomum micranthum f. kanehirae]
Phoebe_bournei_newGene_1638	--	--	Cellular Component: integral component of membrane (GO:0016021);;	--	--	--	--	--	Uncharacterized protein OS=Malus domestica OX=3750 GN=DVH24_016449 PE=4 SV=1	--	--	uncharacterized protein LOC103402334 isoform X1 [Malus domestica]
Phoebe_bournei_newGene_358	--	--	--	--	[S]	Function unknown	Tim17/Tim22/Tim23/Pmp24 family	--	Mitochondrial import inner membrane translocase subunit Tim17/Tim22/Tim23 family protein isoform 1 OS=Cinnamomum micranthum f. kanehirae OX=337451 GN=CKAN_02286500 PE=3 SV=1	S	Function unknown	Mitochondrial import inner membrane translocase subunit Tim17/Tim22/Tim23 family protein isoform 1 [Cinnamomum micranthum f. kanehirae]
Phoebe_bournei_newGene_6394	--	--	Biological Process: ubiquitin-dependent protein catabolic process (GO:0006511);; Cellular Component: integral component of membrane (GO:0016021);; Biological Process: protein deubiquitination (GO:0016579);; Molecular Function: thiol-dependent ubiquitinyl hydrolase activity (GO:0036459);; Molecular Function: metal ion binding (GO:0046872);;	K11855|1.1e-263|nnu:104610002|K11855 ubiquitin carboxyl-terminal hydrolase 36/42 [EC:3.4.19.12] | (RefSeq) ubiquitin carboxyl-terminal hydrolase 15-like	[O]	Posttranslational modification, protein turnover, chaperones	Ubiquitin carboxyl-terminal hydrolase	Ubiquitin carboxyl-terminal hydrolase 15 OS=Arabidopsis thaliana OX=3702 GN=UBP15 PE=1 SV=2	Ubiquitin carboxyl-terminal hydrolase 15-like protein OS=Cinnamomum micranthum f. kanehirae OX=337451 GN=CKAN_02556100 PE=3 SV=1	O	Posttranslational modification, protein turnover, chaperones	ubiquitin carboxyl-terminal hydrolase 15-like protein [Cinnamomum micranthum f. kanehirae]
Phoebe_bournei_newGene_4201	[C]	Energy production and conversion	Biological Process: cellular aldehyde metabolic process (GO:0006081);; Molecular Function: oxidoreductase activity, acting on the aldehyde or oxo group of donors, NAD or NADP as acceptor (GO:0016620);;	K00128|7.3e-162|vvi:100247106|K00128 aldehyde dehydrogenase (NAD+) [EC:1.2.1.3] | (RefSeq) aldehyde dehydrogenase family 3 member F1	[C]	Energy production and conversion	Aldehyde dehydrogenase family	Aldehyde dehydrogenase family 3 member F1 OS=Arabidopsis thaliana OX=3702 GN=ALDH3F1 PE=2 SV=2	Aldehyde dehydrogenase OS=Cinnamomum micranthum f. kanehirae OX=337451 GN=CKAN_01048900 PE=3 SV=1	C	Energy production and conversion	aldehyde dehydrogenase family 3 member F1 [Cinnamomum micranthum f. kanehirae]
Phoebe_bournei_newGene_3540	--	--	--	--	--	--	Domain of unknown function (DUF4216)	--	Transposon, En/Spm-like protein OS=Cinnamomum micranthum f. kanehirae OX=337451 GN=CKAN_02743400 PE=4 SV=1	--	--	Transposon, En/Spm-like protein [Cinnamomum micranthum f. kanehirae]
Phoebe_bournei_newGene_7912	[T]	Signal transduction mechanisms	Molecular Function: protein kinase activity (GO:0004672);; Molecular Function: ATP binding (GO:0005524);; Cellular Component: integral component of membrane (GO:0016021);;	K13430|3.2e-25|ini:109175864|K13430 serine/threonine-protein kinase PBS1 [EC:2.7.11.1] | (RefSeq) serine/threonine-protein kinase PBS1	--	--	Protein tyrosine and serine/threonine kinase	Probable LRR receptor-like serine/threonine-protein kinase At1g53430 OS=Arabidopsis thaliana OX=3702 GN=At1g53430 PE=1 SV=1	Putative leucine-rich repeat receptor-like serine/threonine-protein kinase OS=Cinnamomum micranthum f. kanehirae OX=337451 GN=CKAN_01823300 PE=4 SV=1	T	Signal transduction mechanisms	putative leucine-rich repeat receptor-like serine/threonine-protein kinase [Cinnamomum micranthum f. kanehirae]
Phoebe_bournei_newGene_8464	--	--	--	--	--	--	--	--	Uncharacterized protein (Fragment) OS=Lupinus albus OX=3870 GN=Lal_00043780 PE=4 SV=1	--	--	hypothetical protein Lal_00043780, partial [Lupinus albus]
Phoebe_bournei_newGene_10965	--	--	Cellular Component: Golgi membrane (GO:0000139);; Biological Process: carbohydrate transport (GO:0008643);; Molecular Function: pyrimidine nucleotide-sugar transmembrane transporter activity (GO:0015165);; Cellular Component: integral component of membrane (GO:0016021);;	K15272|2.8e-18|ccaj:109795712|K15272 solute carrier family 35 (UDP-sugar transporter), member A1/2/3 | (RefSeq) CMP-sialic acid transporter 1	[G]	Carbohydrate transport and metabolism	--	CMP-sialic acid transporter 1 OS=Arabidopsis thaliana OX=3702 GN=At5g41760 PE=2 SV=1	Putative UDP-sugar transporter protein SLC35A4 OS=Cajanus cajan OX=3821 GN=KK1_011184 PE=3 SV=1	G	Carbohydrate transport and metabolism	putative UDP-sugar transporter protein SLC35A4 [Cajanus cajan]
Phoebe_bournei_newGene_7651	--	--	Biological Process: SCF-dependent proteasomal ubiquitin-dependent protein catabolic process (GO:0031146);;	--	--	--	F-box domain	--	F-box-like domain-containing protein OS=Cinnamomum micranthum f. kanehirae OX=337451 GN=CKAN_02340000 PE=4 SV=1	--	--	F-box-like domain-containing protein [Cinnamomum micranthum f. kanehirae]
Phoebe_bournei_newGene_6581	--	--	--	--	--	--	--	--	CUE domain-containing protein OS=Cinnamomum micranthum f. kanehirae OX=337451 GN=CKAN_00407000 PE=4 SV=1	S	Function unknown	CUE domain-containing protein [Cinnamomum micranthum f. kanehirae]
Phoebe_bournei_newGene_5038	[R]	General function prediction only	Biological Process: polyamine biosynthetic process (GO:0006596);; Molecular Function: N-carbamoylputrescine amidase activity (GO:0050126);;	K12251|1.2e-62|mus:103988499|K12251 N-carbamoylputrescine amidase [EC:3.5.1.53] | (RefSeq) N-carbamoylputrescine amidase	[E]	Amino acid transport and metabolism	Carbon-nitrogen hydrolase	N-carbamoylputrescine amidase OS=Oryza sativa subsp. japonica OX=39947 GN=CPA PE=2 SV=1	N-carbamoylputrescine amidase OS=Cinnamomum micranthum f. kanehirae OX=337451 GN=CKAN_00761200 PE=4 SV=1	E	Amino acid transport and metabolism	N-carbamoylputrescine amidase [Cinnamomum micranthum f. kanehirae]
Phoebe_bournei_newGene_13356	--	--	Molecular Function: protein kinase activity (GO:0004672);; Molecular Function: ATP binding (GO:0005524);;	--	[T]	Signal transduction mechanisms	--	MAP3K epsilon protein kinase 1 OS=Arabidopsis thaliana OX=3702 GN=M3KE1 PE=1 SV=1	MAP3K epsilon protein kinase 1-like protein isoform X2 OS=Cinnamomum micranthum f. kanehirae OX=337451 GN=CKAN_01863100 PE=4 SV=1	T	Signal transduction mechanisms	MAP3K epsilon protein kinase 1-like protein isoform X2 [Cinnamomum micranthum f. kanehirae]
Phoebe_bournei_newGene_11558	--	--	Molecular Function: DNA-binding transcription factor activity (GO:0003700);; Cellular Component: nucleus (GO:0005634);; Molecular Function: sequence-specific DNA binding (GO:0043565);;	K13457|9.6e-10|nnu:104607873|K13457 disease resistance protein RPM1 | (RefSeq) disease resistance protein RPM1-like	[T]	Signal transduction mechanisms	Rx N-terminal domain	Probable disease resistance protein RXW24L OS=Arabidopsis thaliana OX=3702 GN=RXW24L PE=2 SV=1	Putative WRKY transcription factor 41 OS=Cinnamomum micranthum f. kanehirae OX=337451 GN=CKAN_01304800 PE=4 SV=1	T	Signal transduction mechanisms	putative WRKY transcription factor 41 [Cinnamomum micranthum f. kanehirae]
Phoebe_bournei_newGene_1087	--	--	Molecular Function: oxidoreductase activity (GO:0016491);; Molecular Function: metal ion binding (GO:0046872);;	--	--	--	--	--	Isopenicillin N synthase OS=Cinnamomum micranthum f. kanehirae OX=337451 GN=CKAN_00248700 PE=4 SV=1	Q	Secondary metabolites biosynthesis, transport and catabolism	Isopenicillin N synthase [Cinnamomum micranthum f. kanehirae]
Phoebe_bournei_newGene_7878	--	--	Molecular Function: cysteine-type peptidase activity (GO:0008234);; Cellular Component: integral component of membrane (GO:0016021);;	--	--	--	--	--	Ulp1 protease family, catalytic domain-containing protein OS=Cinnamomum micranthum f. kanehirae OX=337451 GN=CKAN_01758800 PE=3 SV=1	--	--	Ulp1 protease family, catalytic domain-containing protein [Cinnamomum micranthum f. kanehirae]
Phoebe_bournei_newGene_13069	--	--	--	--	--	--	--	--	Myb_DNA-bind_3 domain-containing protein OS=Cinnamomum micranthum f. kanehirae OX=337451 GN=CKAN_00137600 PE=4 SV=1	S	Function unknown	hypothetical protein CKAN_00137600 [Cinnamomum micranthum f. kanehirae]
Phoebe_bournei_newGene_2455	--	--	--	--	--	--	--	--	Uncharacterized protein OS=Cinnamomum micranthum f. kanehirae OX=337451 GN=CKAN_02058100 PE=4 SV=1	--	--	hypothetical protein CKAN_02058100 [Cinnamomum micranthum f. kanehirae]
Phoebe_bournei_newGene_1788	--	--	Biological Process: intracellular protein transport (GO:0006886);;	K23222|7.0e-06|oeu:111367135|K23222 nuclease HARBI1 [EC:3.1.-.-] | (RefSeq) uncharacterized protein LOC111367135 isoform X1	--	--	--	--	Putative nuclease HARBI1 isoform X1 OS=Cinnamomum micranthum f. kanehirae OX=337451 GN=CKAN_01515400 PE=3 SV=1	L	Replication, recombination and repair	putative nuclease HARBI1 isoform X1 [Cinnamomum micranthum f. kanehirae]
Phoebe_bournei_newGene_6371	--	--	Molecular Function: translation elongation factor activity (GO:0003746);; Biological Process: ubiquitin-dependent protein catabolic process (GO:0006511);;	K03872|1.3e-48|sind:105170634|K03872 elongin-C | (RefSeq) elongin-C	[K]	Transcription	Skp1 family, tetramerisation domain	--	Elongin-C OS=Cinnamomum micranthum f. kanehirae OX=337451 GN=CKAN_02123300 PE=3 SV=1	K	Transcription	transcription elongation factor B polypeptide 1 [Cinnamomum micranthum f. kanehirae]
Phoebe_bournei_newGene_2425	--	--	Molecular Function: ligand-gated ion channel activity (GO:0015276);; Cellular Component: integral component of membrane (GO:0016021);;	K05387|1.4e-95|aof:109840487|K05387 glutamate receptor, ionotropic, plant | (RefSeq) glutamate receptor 2.5-like isoform X1	[PET]	--	Bacterial extracellular solute-binding proteins, family 3	Glutamate receptor 2.5 OS=Arabidopsis thaliana OX=3702 GN=GLR2.5 PE=2 SV=2	Glutamate receptor 2.5-like protein isoform X1 OS=Cinnamomum micranthum f. kanehirae OX=337451 GN=CKAN_02051900 PE=4 SV=1	--	--	glutamate receptor 2.5-like protein isoform X1 [Cinnamomum micranthum f. kanehirae]
Phoebe_bournei_newGene_1111	[R]	General function prediction only	Molecular Function: GTP binding (GO:0005525);; Biological Process: intracellular protein transport (GO:0006886);; Cellular Component: chloroplast outer membrane (GO:0009707);; Molecular Function: P-P-bond-hydrolysis-driven protein transmembrane transporter activity (GO:0015450);; Cellular Component: integral component of membrane (GO:0016021);; Molecular Function: hydrolase activity (GO:0016787);…	--	--	--	AIG1 family	Translocase of chloroplast 34, chloroplastic OS=Arabidopsis thaliana OX=3702 GN=TOC34 PE=1 SV=2	Translocase of chloroplast OS=Cinnamomum micranthum f. kanehirae OX=337451 GN=CKAN_01685700 PE=3 SV=1	F	Nucleotide transport and metabolism	translocase of chloroplast 34, chloroplastic-like protein [Cinnamomum micranthum f. kanehirae]
Phoebe_bournei_newGene_9451	--	--	--	--	--	--	Plant transposase (Ptta/En/Spm family)	--	Transpos_assoc domain-containing protein OS=Cinnamomum micranthum f. kanehirae OX=337451 GN=CKAN_00447800 PE=4 SV=1	--	--	hypothetical protein CKAN_00447800 [Cinnamomum micranthum f. kanehirae]
Phoebe_bournei_newGene_10859	--	--	--	--	--	--	--	--	Uncharacterized protein OS=Cinnamomum micranthum f. kanehirae OX=337451 GN=CKAN_00888200 PE=4 SV=1	--	--	hypothetical protein CKAN_00888200 [Cinnamomum micranthum f. kanehirae]
Phoebe_bournei_newGene_11137	--	--	Molecular Function: hydrolase activity, hydrolyzing O-glycosyl compounds (GO:0004553);; Biological Process: carbohydrate metabolic process (GO:0005975);;	K19891|8.4e-55|gmx:100792634|K19891 glucan endo-1,3-beta-glucosidase 1/2/3 [EC:3.2.1.39] | (RefSeq) glucan endo-1,3-beta-glucosidase 2 isoform X2	--	--	Glycosyl hydrolases family 17	Glucan endo-1,3-beta-glucosidase OS=Musa acuminata OX=4641 GN=BANGLUC PE=1 SV=2	Glucan endo-1,3-beta-glucosidase-like protein OS=Cinnamomum micranthum f. kanehirae OX=337451 GN=CKAN_00451900 PE=3 SV=1	G	Carbohydrate transport and metabolism	glucan endo-1,3-beta-glucosidase-like protein [Cinnamomum micranthum f. kanehirae]
Phoebe_bournei_newGene_11591	[G]	Carbohydrate transport and metabolism	Molecular Function: hydrolase activity (GO:0016787);;	K06611|2.5e-160|vvi:100246503|K06611 stachyose synthetase [EC:2.4.1.67] | (RefSeq) stachyose synthase	--	--	Raffinose synthase or seed imbibition protein Sip1	Stachyose synthase OS=Pisum sativum OX=3888 GN=STS1 PE=1 SV=1	Glycosyl hydrolases 36 OS=Macleaya cordata OX=56857 GN=BVC80_1543g211 PE=3 SV=1	S	Function unknown	Glycosyl hydrolases 36 [Macleaya cordata]
Phoebe_bournei_newGene_12091	--	--	Cellular Component: integral component of membrane (GO:0016021);;	--	--	--	--	--	Uncharacterized protein OS=Arundo donax OX=35708 PE=4 SV=1	--	--	--
Phoebe_bournei_newGene_2332	--	--	Molecular Function: metal ion binding (GO:0046872);;	K01081|9.0e-14|bpg:Bathy13g00540|K01081 5'-nucleotidase [EC:3.1.3.5] | (RefSeq) hypothetical protein	[F]	Nucleotide transport and metabolism	5' nucleotidase family	--	5'-nucleotidase domain-containing protein 4-like protein isoform X2 OS=Cinnamomum micranthum f. kanehirae OX=337451 GN=CKAN_02507700 PE=3 SV=1	F	Nucleotide transport and metabolism	5'-nucleotidase domain-containing protein 4 isoform X2 [Tripterygium wilfordii]
Phoebe_bournei_newGene_7094	--	--	Biological Process: defense response (GO:0006952);; Molecular Function: ADP binding (GO:0043531);;	K13457|1.5e-15|bdi:104584507|K13457 disease resistance protein RPM1 | (RefSeq) disease resistance protein RPM1 isoform X1	--	--	--	--	Putative disease resistance protein OS=Cinnamomum micranthum f. kanehirae OX=337451 GN=CKAN_01362300 PE=4 SV=1	T	Signal transduction mechanisms	putative disease resistance protein [Cinnamomum micranthum f. kanehirae]
Phoebe_bournei_newGene_4508	--	--	Molecular Function: enzyme inhibitor activity (GO:0004857);; Biological Process: negative regulation of catalytic activity (GO:0043086);;	--	--	--	Plant invertase/pectin methylesterase inhibitor	--	PMEI domain-containing protein OS=Citrus sinensis OX=2711 GN=CISIN_1g042545mg PE=4 SV=1	S	Function unknown	cell wall / vacuolar inhibitor of fructosidase 1-like [Tripterygium wilfordii]
Phoebe_bournei_newGene_11004	--	--	Cellular Component: nucleus (GO:0005634);;	K13109|3.3e-266|vvi:100264670|K13109 IK cytokine | (RefSeq) suppressor of mec-8 and unc-52 protein homolog 2	[T]	Signal transduction mechanisms	RED-like protein N-terminal region	Suppressor of mec-8 and unc-52 protein homolog 2 OS=Arabidopsis thaliana OX=3702 GN=SMU2 PE=1 SV=1	Suppressor of mec-8 and unc-52 protein 2 OS=Cinnamomum micranthum f. kanehirae OX=337451 GN=CKAN_00802200 PE=3 SV=1	T	Signal transduction mechanisms	suppressor of mec-8 and unc-52 protein 2 [Cinnamomum micranthum f. kanehirae]
Phoebe_bournei_newGene_6710	--	--	Molecular Function: molecular_function (GO:0003674);; Molecular Function: binding (GO:0005488);; Molecular Function: protein binding (GO:0005515);; Molecular Function: microtubule binding (GO:0008017);; Molecular Function: cytoskeletal protein binding (GO:0008092);; Biological Process: biological_process (GO:0008150);; Biological Process: response to endogenous stimulus (GO:0009719);; Biological …	K21596|1.2e-17|sind:105176456|K21596 calmodulin-binding transcription activator | (RefSeq) protein WVD2-like 2 isoform X1	--	--	Targeting protein for Xklp2 (TPX2) domain	Protein WVD2-like 5 OS=Arabidopsis thaliana OX=3702 GN=WDL5 PE=1 SV=1	Protein WVD2-like protein 5 isoform X1 OS=Cinnamomum micranthum f. kanehirae OX=337451 GN=CKAN_00587700 PE=3 SV=1	S	Function unknown	protein WVD2-like protein 5 isoform X1 [Cinnamomum micranthum f. kanehirae]
Phoebe_bournei_newGene_11307	--	--	--	--	[S]	Function unknown	MAGE family	--	Melanoma-associated antigen 1 isoform X1 OS=Cinnamomum micranthum f. kanehirae OX=337451 GN=CKAN_01899400 PE=4 SV=1	S	Function unknown	melanoma-associated antigen 1 isoform X1 [Cinnamomum micranthum f. kanehirae]
Phoebe_bournei_newGene_1027	--	--	Cellular Component: integral component of membrane (GO:0016021);;	--	[S]	Function unknown	Sad1 / UNC-like C-terminal	SUN domain-containing protein 4 OS=Arabidopsis thaliana OX=3702 GN=SUN4 PE=1 SV=1	Sad1_UNC domain-containing protein OS=Cinnamomum micranthum f. kanehirae OX=337451 GN=CKAN_02192500 PE=4 SV=1	S	Function unknown	Sad1_UNC domain-containing protein [Cinnamomum micranthum f. kanehirae]
Phoebe_bournei_newGene_6450	--	--	Molecular Function: transferase activity (GO:0016740);;	--	--	--	--	Uncharacterized protein At4g14100 OS=Arabidopsis thaliana OX=3702 GN=At4g14100 PE=2 SV=1	Glycosyl transferase OS=Cinnamomum micranthum f. kanehirae OX=337451 GN=CKAN_00140700 PE=4 SV=1	S	Function unknown	glycosyl transferase [Cinnamomum micranthum f. kanehirae]
Phoebe_bournei_newGene_2443	--	--	Molecular Function: methyltransferase activity (GO:0008168);; Biological Process: methylation (GO:0032259);;	K19199|5.6e-194|pda:103701561|K19199 protein-histidine N-methyltransferase [EC:2.1.1.85] | (RefSeq) uncharacterized protein LOC103701561 isoform X1	--	--	SET domain	--	Histone-lysine N-methyltransferase setd3 OS=Cinnamomum micranthum f. kanehirae OX=337451 GN=CKAN_02054900 PE=4 SV=1	S	Function unknown	histone-lysine N-methyltransferase setd3 [Cinnamomum micranthum f. kanehirae]
Phoebe_bournei_newGene_11379	--	--	Molecular Function: GTP binding (GO:0005525);;	--	--	--	--	--	ADP-ribosylation factor 2-like protein OS=Cinnamomum micranthum f. kanehirae OX=337451 GN=CKAN_02452300 PE=3 SV=1	--	--	ADP-ribosylation factor 2-like protein [Cinnamomum micranthum f. kanehirae]
Phoebe_bournei_newGene_5142	[O]	Posttranslational modification, protein turnover, chaperones	Molecular Function: protein binding (GO:0005515);; Cellular Component: cellular_component (GO:0005575);; Cellular Component: intracellular (GO:0005622);; Cellular Component: obsolete cell (GO:0005623);; Cellular Component: cytoplasm (GO:0005737);; Cellular Component: cytosol (GO:0005829);; Cellular Component: plasma membrane (GO:0005886);; Biological Process: cellular protein modification process…	K12158|4.9e-79|cic:CICLE_v10006134mg|K12158 ubiquitin-like protein Nedd8 | (RefSeq) hypothetical protein	[OR]	--	Ubiquitin family	Ubiquitin-NEDD8-like protein RUB1 OS=Arabidopsis thaliana OX=3702 GN=RUB1 PE=1 SV=3	Uncharacterized protein OS=Citrus clementina OX=85681 GN=CICLE_v10006134mg PE=4 SV=1	O	Posttranslational modification, protein turnover, chaperones	ubiquitin-NEDD8-like protein RUB2 [Citrus clementina]
Phoebe_bournei_newGene_3994	--	--	Cellular Component: Golgi apparatus (GO:0005794);; Biological Process: xyloglucan metabolic process (GO:0010411);; Cellular Component: integral component of membrane (GO:0016021);; Molecular Function: O-acetyltransferase activity (GO:0016413);;	--	--	--	--	--	Protein ALTERED XYLOGLUCAN 4 OS=Cinnamomum micranthum f. kanehirae OX=337451 GN=CKAN_00557900 PE=3 SV=1	--	--	protein ALTERED XYLOGLUCAN 4 [Cinnamomum micranthum f. kanehirae]
Phoebe_bournei_newGene_6308	--	--	Molecular Function: nucleotide binding (GO:0000166);; Molecular Function: DNA binding (GO:0003677);; Molecular Function: DNA-directed DNA polymerase activity (GO:0003887);; Biological Process: DNA replication (GO:0006260);; Biological Process: DNA repair (GO:0006281);; Molecular Function: zinc ion binding (GO:0008270);; Cellular Component: epsilon DNA polymerase complex (GO:0008622);; Molecular F…	K02324|8.4e-78|nnu:104586917|K02324 DNA polymerase epsilon subunit 1 [EC:2.7.7.7] | (RefSeq) DNA polymerase epsilon catalytic subunit A-like	[L]	Replication, recombination and repair	Domain of unknown function (DUF1744)	DNA polymerase epsilon catalytic subunit A OS=Arabidopsis thaliana OX=3702 GN=POL2A PE=1 SV=1	DNA polymerase epsilon catalytic subunit OS=Cinnamomum micranthum f. kanehirae OX=337451 GN=CKAN_02657900 PE=3 SV=1	L	Replication, recombination and repair	DNA polymerase epsilon catalytic subunit A-like protein [Cinnamomum micranthum f. kanehirae]
Phoebe_bournei_newGene_2077	--	--	Molecular Function: calcium ion binding (GO:0005509);;	K06268|3.2e-97|mesc:110604401|K06268 serine/threonine-protein phosphatase 2B regulatory subunit | (RefSeq) calcineurin B-like protein 1 isoform X1	[T]	Signal transduction mechanisms	EF hand	Calcineurin B-like protein 1 OS=Arabidopsis thaliana OX=3702 GN=CBL1 PE=1 SV=3	Calcineurin B-like protein 1 isoform X1 OS=Cinnamomum micranthum f. kanehirae OX=337451 GN=CKAN_01632100 PE=4 SV=1	T	Signal transduction mechanisms	calcineurin B-like protein 1 isoform X1 [Cinnamomum micranthum f. kanehirae]
Phoebe_bournei_newGene_5513	--	--	--	--	--	--	Leucine Rich repeats (2 copies)	--	Putative disease resistance RPP13-like protein 1 OS=Cinnamomum micranthum f. kanehirae OX=337451 GN=CKAN_01358300 PE=4 SV=1	T	Signal transduction mechanisms	putative disease resistance RPP13-like protein 1 [Cinnamomum micranthum f. kanehirae]
Phoebe_bournei_newGene_5373	[G]	Carbohydrate transport and metabolism	Molecular Function: chitinase activity (GO:0004568);; Biological Process: carbohydrate metabolic process (GO:0005975);; Biological Process: chitin catabolic process (GO:0006032);; Cellular Component: integral component of membrane (GO:0016021);; Biological Process: cell wall macromolecule catabolic process (GO:0016998);;	K20547|4.4e-128|egu:105059691|K20547 basic endochitinase B [EC:3.2.1.14] | (RefSeq) chitinase 1	[R]	General function prediction only	Chitinase class I	Endochitinase OS=Persea americana OX=3435 GN=chi1 PE=1 SV=2	Class I chitinase OS=Cinnamomum micranthum f. kanehirae OX=337451 GN=CKAN_01971000 PE=4 SV=1	S	Function unknown	class I chitinase [Cinnamomum micranthum f. kanehirae]
Phoebe_bournei_newGene_6105	[IR]	--	Molecular Function: NAD+ kinase activity (GO:0003951);; Molecular Function: diacylglycerol kinase activity (GO:0004143);; Molecular Function: ATP binding (GO:0005524);; Biological Process: defense response (GO:0006952);; Biological Process: protein kinase C-activating G protein-coupled receptor signaling pathway (GO:0007205);;	K00901|2.1e-222|egu:105045440|K00901 diacylglycerol kinase (ATP) [EC:2.7.1.107] | (RefSeq) diacylglycerol kinase 5	[IT]	--	Diacylglycerol kinase accessory domain	Diacylglycerol kinase 5 OS=Arabidopsis thaliana OX=3702 GN=DGK5 PE=2 SV=1	diacylglycerol kinase OS=Cinnamomum micranthum f. kanehirae OX=337451 GN=CKAN_02004500 PE=3 SV=1	--	--	diacylglycerol kinase 5-like protein isoform X1 [Cinnamomum micranthum f. kanehirae]
Phoebe_bournei_newGene_8302	[T]	Signal transduction mechanisms	Molecular Function: protein kinase activity (GO:0004672);; Molecular Function: ATP binding (GO:0005524);; Cellular Component: integral component of membrane (GO:0016021);; Biological Process: recognition of pollen (GO:0048544);;	K24104|1.7e-39|thj:104799061|K24104 GPN-loop GTPase | (RefSeq) LOW QUALITY PROTEIN: uncharacterized protein LOC104799061	--	--	Protein kinase domain	G-type lectin S-receptor-like serine/threonine-protein kinase B120 OS=Arabidopsis thaliana OX=3702 GN=B120 PE=2 SV=1	Protein kinase domain-containing protein OS=Cinnamomum micranthum f. kanehirae OX=337451 GN=CKAN_01717600 PE=4 SV=1	T	Signal transduction mechanisms	Protein kinase domain-containing protein [Cinnamomum micranthum f. kanehirae]
Phoebe_bournei_newGene_7775	[N]	Cell motility	Cellular Component: integral component of membrane (GO:0016021);; Molecular Function: transferase activity, transferring glycosyl groups (GO:0016757);;	K13680|1.8e-274|mesc:110622091|K13680 beta-mannan synthase [EC:2.4.1.32] | (RefSeq) glucomannan 4-beta-mannosyltransferase 9	--	--	Glycosyltransferase like family 2	Glucomannan 4-beta-mannosyltransferase 9 OS=Arabidopsis thaliana OX=3702 GN=CSLA9 PE=1 SV=1	Glucomannan 4-beta-mannosyltransferase 9 OS=Cinnamomum micranthum f. kanehirae OX=337451 GN=CKAN_01109700 PE=4 SV=1	M	Cell wall/membrane/envelope biogenesis	glucomannan 4-beta-mannosyltransferase 9 [Cinnamomum micranthum f. kanehirae]
Phoebe_bournei_newGene_10439	--	--	--	--	--	--	--	--	Transposon protein, putative, CACTA, En/Spm sub-class, expressed OS=Cinnamomum micranthum f. kanehirae OX=337451 GN=CKAN_00357100 PE=4 SV=1	K	Transcription	transposon protein, putative, CACTA, En/Spm sub-class, expressed [Cinnamomum micranthum f. kanehirae]
Phoebe_bournei_newGene_2440	--	--	Molecular Function: calmodulin binding (GO:0005516);;	--	--	--	Calmodulin binding protein-like	Calmodulin-binding protein 60 B OS=Arabidopsis thaliana OX=3702 GN=CBP60B PE=2 SV=1	Calmodulin-binding protein 60 B-like protein OS=Cinnamomum micranthum f. kanehirae OX=337451 GN=CKAN_02053800 PE=3 SV=1	S	Function unknown	calmodulin-binding protein 60 B-like protein [Cinnamomum micranthum f. kanehirae]
Phoebe_bournei_newGene_5963	--	--	Molecular Function: nucleic acid binding (GO:0003676);; Molecular Function: 5'-3' exoribonuclease activity (GO:0004534);; Cellular Component: nucleus (GO:0005634);; Biological Process: mRNA processing (GO:0006397);;	K12619|3.8e-233|vvi:100263222|K12619 5'-3' exoribonuclease 2 [EC:3.1.13.-] | (RefSeq) 5'-3' exoribonuclease 3	[LA]	--	Xrn1 helical domain	5'-3' exoribonuclease 3 OS=Arabidopsis thaliana OX=3702 GN=XRN3 PE=1 SV=1	5'-3' exoribonuclease OS=Cinnamomum micranthum f. kanehirae OX=337451 GN=CKAN_00966000 PE=3 SV=1	--	--	putative 5-3 exonuclease [Cinnamomum micranthum f. kanehirae]
Phoebe_bournei_newGene_1349	--	--	--	--	--	--	NPH3 family	BTB/POZ domain-containing protein At3g44820 OS=Arabidopsis thaliana OX=3702 GN=At3g44820 PE=2 SV=2	BTB/POZ domain-containing-like protein OS=Cinnamomum micranthum f. kanehirae OX=337451 GN=CKAN_01220900 PE=3 SV=1	S	Function unknown	BTB/POZ domain-containing-like protein [Cinnamomum micranthum f. kanehirae]
Phoebe_bournei_newGene_4821	--	--	Cellular Component: GINS complex (GO:0000811);; Biological Process: DNA replication (GO:0006260);;	K10732|9.4e-89|pda:103715496|K10732 GINS complex subunit 1 | (RefSeq) DNA replication complex GINS protein PSF1 isoform X3	[L]	Replication, recombination and repair	GINS complex protein	--	DNA replication complex GINS protein PSF1 isoform X1 OS=Cinnamomum micranthum f. kanehirae OX=337451 GN=CKAN_00008800 PE=3 SV=1	L	Replication, recombination and repair	DNA replication complex GINS protein PSF1 isoform X1 [Cinnamomum micranthum f. kanehirae]
Phoebe_bournei_newGene_12339	--	--	Molecular Function: RNA binding (GO:0003723);; Molecular Function: exonuclease activity (GO:0004527);; Molecular Function: ribonuclease activity (GO:0004540);;	K12585|1.4e-61|egu:105042745|K12585 exosome complex exonuclease DIS3/RRP44 [EC:3.1.13.-] | (RefSeq) exosome complex exonuclease RRP44 homolog A isoform X1	[J]	Translation, ribosomal structure and biogenesis	Dis3-like cold-shock domain 2 (CSD2)	Exosome complex exonuclease RRP44 homolog A OS=Arabidopsis thaliana OX=3702 GN=RRP44A PE=2 SV=2	exosome complex exonuclease RRP44 homolog A OS=Nelumbo nucifera OX=4432 GN=LOC104606826 PE=3 SV=1	J	Translation, ribosomal structure and biogenesis	exosome complex exonuclease RRP44 homolog A isoform X2 [Elaeis guineensis]
Phoebe_bournei_newGene_1478	--	--	Cellular Component: host cell nucleus (GO:0042025);;	K21777|4.5e-35|cpap:110817290|K21777 G2/mitotic-specific cyclin-B, other | (RefSeq) putative cyclin-B3-1	[D]	Cell cycle control, cell division, chromosome partitioning	Cyclin, N-terminal domain	Putative cyclin-B3-1 OS=Arabidopsis thaliana OX=3702 GN=CYCB3-1 PE=3 SV=2	Putative cyclin-B3-1 isoform X2 OS=Cinnamomum micranthum f. kanehirae OX=337451 GN=CKAN_01455000 PE=3 SV=1	D	Cell cycle control, cell division, chromosome partitioning	putative cyclin-B3-1 isoform X2 [Cinnamomum micranthum f. kanehirae]
Phoebe_bournei_newGene_836	--	--	--	--	[TO]	--	--	OVARIAN TUMOR DOMAIN-containing deubiquitinating enzyme 12 OS=Arabidopsis thaliana OX=3702 GN=OTU12 PE=2 SV=1	Ovarian tumor OS=Cinnamomum micranthum f. kanehirae OX=337451 GN=CKAN_01581200 PE=4 SV=1	--	--	Ovarian tumor [Cinnamomum micranthum f. kanehirae]
Phoebe_bournei_newGene_8058	--	--	Molecular Function: cysteine-type peptidase activity (GO:0008234);;	--	--	--	Ulp1 protease family, C-terminal catalytic domain	--	Protein MAINTENANCE OF MERISTEMS-like protein OS=Cinnamomum micranthum f. kanehirae OX=337451 GN=CKAN_01064800 PE=3 SV=1	--	--	protein MAINTENANCE OF MERISTEMS-like protein [Cinnamomum micranthum f. kanehirae]
Phoebe_bournei_newGene_5063	--	--	Biological Process: defense response (GO:0006952);; Molecular Function: ADP binding (GO:0043531);;	K15078|2.5e-122|tcc:18614561|K15078 structure-specific endonuclease subunit SLX1 [EC:3.6.1.-] | (RefSeq) putative disease resistance protein RGA3	[T]	Signal transduction mechanisms	NB-ARC domain	Putative disease resistance protein RGA4 OS=Solanum bulbocastanum OX=147425 GN=RGA4 PE=2 SV=1	Putative disease resistance protein RGA3 OS=Cinnamomum micranthum f. kanehirae OX=337451 GN=CKAN_00328600 PE=4 SV=1	T	Signal transduction mechanisms	putative disease resistance protein RGA3 [Cinnamomum micranthum f. kanehirae]
Phoebe_bournei_newGene_576	--	--	Molecular Function: protein serine/threonine kinase activity (GO:0004674);; Molecular Function: ATP binding (GO:0005524);; Cellular Component: integral component of membrane (GO:0016021);;	K13420|7.2e-20|sind:105162157|K13420 LRR receptor-like serine/threonine-protein kinase FLS2 [EC:2.7.11.1] | (RefSeq) probable LRR receptor-like serine/threonine-protein kinase At3g47570	--	--	Leucine rich repeat N-terminal domain	LRR receptor-like serine/threonine-protein kinase EFR OS=Arabidopsis thaliana OX=3702 GN=EFR PE=1 SV=1	Protein kinase domain-containing protein OS=Cinnamomum micranthum f. kanehirae OX=337451 GN=CKAN_02038800 PE=3 SV=1	T	Signal transduction mechanisms	Protein kinase domain-containing protein [Cinnamomum micranthum f. kanehirae]
Phoebe_bournei_newGene_11693	--	--	Biological Process: intracellular protein transport (GO:0006886);;	K23222|1.3e-39|oeu:111367135|K23222 nuclease HARBI1 [EC:3.1.-.-] | (RefSeq) uncharacterized protein LOC111367135 isoform X1	[L]	Replication, recombination and repair	DDE superfamily endonuclease	--	Putative nuclease HARBI1 isoform X1 OS=Cinnamomum micranthum f. kanehirae OX=337451 GN=CKAN_01515400 PE=3 SV=1	L	Replication, recombination and repair	putative nuclease HARBI1 isoform X1 [Cinnamomum micranthum f. kanehirae]
Phoebe_bournei_newGene_8169	[P]	Inorganic ion transport and metabolism	Cellular Component: integral component of membrane (GO:0016021);;	K21866|1.3e-47|mcha:111019815|K21866 ion channel POLLUX/CASTOR | (RefSeq) ion channel CASTOR-like isoform X1	--	--	Castor and Pollux, part of voltage-gated ion channel	Putative ion channel POLLUX-like 2 OS=Arabidopsis thaliana OX=3702 GN=At5g43745 PE=2 SV=1	CASTOR/POLLUX/SYM8 ion channel OS=Cinnamomum micranthum f. kanehirae OX=337451 GN=CKAN_00962300 PE=3 SV=1	P	Inorganic ion transport and metabolism	CASTOR/POLLUX/SYM8 ion channel [Cinnamomum micranthum f. kanehirae]
Phoebe_bournei_newGene_11393	[Q]	Secondary metabolites biosynthesis, transport and catabolism	Molecular Function: oxidoreductase activity (GO:0016491);; Molecular Function: metal ion binding (GO:0046872);;	K24028|1.6e-38|adu:107460505|K24028 salicylic acid 3-hydroxylase [EC:1.14.11.-] | (RefSeq) protein DMR6-LIKE OXYGENASE 1	[QR]	--	2OG-Fe(II) oxygenase superfamily	2-oxoglutarate-dependent dioxygenase 19 OS=Oryza sativa subsp. japonica OX=39947 GN=2ODD19 PE=1 SV=1	2OG-FeII_Oxy domain-containing protein/DIOX_N domain-containing protein OS=Cinnamomum micranthum f. kanehirae OX=337451 GN=CKAN_00499400 PE=3 SV=1	Q	Secondary metabolites biosynthesis, transport and catabolism	LOW QUALITY PROTEIN: 2OG-FeII_Oxy domain-containing protein/DIOX_N domain-containing protein [Cinnamomum micranthum f. kanehirae]
Phoebe_bournei_newGene_12798	--	--	Molecular Function: GTPase activator activity (GO:0005096);; Molecular Function: metal ion binding (GO:0046872);;	K12486|5.8e-18|mus:103998675|K12486 stromal membrane-associated protein | (RefSeq) ADP-ribosylation factor GTPase-activating protein AGD12-like isoform X2	--	--	--	--	Uncharacterized protein OS=Aquilegia coerulea OX=218851 GN=AQUCO_12500029v1 PE=4 SV=1	T	Signal transduction mechanisms	hypothetical protein AQUCO_12500029v1 [Aquilegia coerulea]
Phoebe_bournei_newGene_1429	--	--	--	--	--	--	Protein of unknown function (DUF1668)	--	Uncharacterized protein (Fragment) OS=Rhododendron williamsianum OX=262921 GN=C3L33_18487 PE=4 SV=1	--	--	hypothetical protein C3L33_18487, partial [Rhododendron williamsianum]
Phoebe_bournei_newGene_3734	--	--	Molecular Function: DNA binding (GO:0003677);; Cellular Component: nucleus (GO:0005634);;	--	--	--	B3 DNA binding domain	B3 domain-containing protein Os05g0481400 OS=Oryza sativa subsp. japonica OX=39947 GN=Os05g0481400 PE=2 SV=1	TF-B3 domain-containing protein OS=Cinnamomum micranthum f. kanehirae OX=337451 GN=CKAN_00764500 PE=4 SV=1	K	Transcription	hypothetical protein CKAN_00764500 [Cinnamomum micranthum f. kanehirae]
Phoebe_bournei_newGene_6569	--	--	Molecular Function: transferase activity, transferring acyl groups (GO:0016746);;	--	--	--	--	--	Glycerol-3-phosphate acyltransferase OS=Actinidia chinensis var. chinensis OX=1590841 GN=CEY00_Acc02420 PE=4 SV=1	--	--	Glycerol-3-phosphate acyltransferase [Actinidia chinensis var. chinensis]
Phoebe_bournei_newGene_3630	--	--	Molecular Function: protein kinase activity (GO:0004672);; Molecular Function: ATP binding (GO:0005524);;	K12153|4.9e-17|vra:106778952|K12153 phenylalanine N-monooxygenase [EC:1.14.14.40] | (RefSeq) isoleucine N-monooxygenase 2-like	--	--	Domain of unknown function (DUF4218)	--	Transposase OS=Cinnamomum micranthum f. kanehirae OX=337451 GN=CKAN_01728100 PE=4 SV=1	S	Function unknown	transposase [Cinnamomum micranthum f. kanehirae]
Phoebe_bournei_newGene_10981	--	--	--	--	--	--	--	--	Uncharacterized protein OS=Cinnamomum micranthum f. kanehirae OX=337451 GN=CKAN_00443600 PE=4 SV=1	S	Function unknown	hypothetical protein CKAN_00443600 [Cinnamomum micranthum f. kanehirae]
Phoebe_bournei_newGene_6943	[O]	Posttranslational modification, protein turnover, chaperones	Molecular Function: serine-type endopeptidase activity (GO:0004252);;	K15333|1.3e-26|nsy:104224633|K15333 tRNA guanosine-2'-O-methyltransferase [EC:2.1.1.34] | (RefSeq) uncharacterized protein LOC104224633	--	--	Subtilase family	Subtilisin-like protease SBT3.6 OS=Arabidopsis thaliana OX=3702 GN=SBT3.6 PE=2 SV=1	Peptidase S8/S53 domain-containing protein OS=Cinnamomum micranthum f. kanehirae OX=337451 GN=CKAN_01664600 PE=3 SV=1	O	Posttranslational modification, protein turnover, chaperones	Peptidase S8/S53 domain-containing protein [Cinnamomum micranthum f. kanehirae]
Phoebe_bournei_newGene_1585	--	--	Molecular Function: nucleoside transmembrane transporter activity (GO:0005337);; Cellular Component: integral component of membrane (GO:0016021);;	K15014|1.6e-28|sita:101776691|K15014 solute carrier family 29 (equilibrative nucleoside transporter), member 1/2/3 | (RefSeq) equilibrative nucleotide transporter 3 isoform X2	[F]	Nucleotide transport and metabolism	--	Equilibrative nucleotide transporter 3 OS=Arabidopsis thaliana OX=3702 GN=ENT3 PE=1 SV=1	Equilibrative nucleotide transporter 3-like protein OS=Cinnamomum micranthum f. kanehirae OX=337451 GN=CKAN_00529500 PE=3 SV=1	F	Nucleotide transport and metabolism	equilibrative nucleotide transporter 3-like protein [Cinnamomum micranthum f. kanehirae]
Phoebe_bournei_newGene_570	[O]	Posttranslational modification, protein turnover, chaperones	Molecular Function: protein serine/threonine kinase activity (GO:0004674);; Molecular Function: ATP binding (GO:0005524);; Cellular Component: integral component of membrane (GO:0016021);;	K18195|3.5e-68|dcr:108224328|K18195 rhamnogalacturonan endolyase [EC:4.2.2.23] | (RefSeq) probable LRR receptor-like serine/threonine-protein kinase At3g47570	--	--	Leucine rich repeat	Putative receptor-like protein kinase At3g47110 OS=Arabidopsis thaliana OX=3702 GN=At3g47110 PE=3 SV=1	Protein kinase domain-containing protein OS=Cinnamomum micranthum f. kanehirae OX=337451 GN=CKAN_02038800 PE=3 SV=1	T	Signal transduction mechanisms	Protein kinase domain-containing protein [Cinnamomum micranthum f. kanehirae]
Phoebe_bournei_newGene_405	--	--	Molecular Function: molecular_function (GO:0003674);; Molecular Function: nucleic acid binding (GO:0003676);; Molecular Function: DNA binding (GO:0003677);; Molecular Function: DNA-binding transcription factor activity (GO:0003700);; Molecular Function: binding (GO:0005488);; Cellular Component: cellular_component (GO:0005575);; Cellular Component: intracellular (GO:0005622);; Cellular Component:…	K14494|1.6e-13|lang:109359883|K14494 DELLA protein | (RefSeq) DELLA protein GAIP-B-like	--	--	GRAS domain family	Scarecrow-like protein 28 OS=Arabidopsis thaliana OX=3702 GN=SCL28 PE=1 SV=1	Scarecrow-like protein 28 isoform X1 OS=Cinnamomum micranthum f. kanehirae OX=337451 GN=CKAN_01841800 PE=3 SV=1	K	Transcription	scarecrow-like protein 28 isoform X1 [Cinnamomum micranthum f. kanehirae]
Phoebe_bournei_newGene_1978	--	--	Molecular Function: calcium ion binding (GO:0005509);; Molecular Function: calcium-dependent phospholipid binding (GO:0005544);;	--	--	--	--	--	Annexin OS=Cinnamomum micranthum f. kanehirae OX=337451 GN=CKAN_00347900 PE=3 SV=1	--	--	annexin D5-like protein [Cinnamomum micranthum f. kanehirae]
Phoebe_bournei_newGene_13297	--	--	Molecular Function: nucleic acid binding (GO:0003676);; Biological Process: DNA integration (GO:0015074);;	K05666|1.7e-15|cann:107874343|K05666 ATP-binding cassette, subfamily C (CFTR/MRP), member 2 | (RefSeq) ABC transporter C family member 10-like	[R]	General function prediction only	--	Retrovirus-related Pol polyprotein from transposon TNT 1-94 OS=Nicotiana tabacum OX=4097 PE=2 SV=1	Retrovirus-related Pol polyprotein from transposon TNT 1-94 OS=Cajanus cajan OX=3821 GN=KK1_042357 PE=4 SV=1	L	Replication, recombination and repair	Retrovirus-related Pol polyprotein from transposon TNT 1-94 [Cajanus cajan]
Phoebe_bournei_newGene_9882	--	--	Molecular Function: G protein-coupled receptor activity (GO:0004930);; Molecular Function: ligand-gated ion channel activity (GO:0015276);; Cellular Component: integral component of membrane (GO:0016021);;	K05387|8.5e-134|nnu:104586704|K05387 glutamate receptor, ionotropic, plant | (RefSeq) glutamate receptor 2.7-like	[PET]	--	Receptor family ligand binding region	Glutamate receptor 2.1 OS=Arabidopsis thaliana OX=3702 GN=GLR2.1 PE=2 SV=2	Glutamate receptor 2.7 OS=Cinnamomum micranthum f. kanehirae OX=337451 GN=CKAN_00374300 PE=3 SV=1	--	--	Glutamate receptor 2.7 [Cinnamomum micranthum f. kanehirae]
Phoebe_bournei_newGene_11070	--	--	--	K10683|2.8e-69|cic:CICLE_v10014038mg|K10683 BRCA1-associated RING domain protein 1 | (RefSeq) hypothetical protein	[R]	General function prediction only	PPR repeat	Pentatricopeptide repeat-containing protein ELI1, chloroplastic OS=Arabidopsis thaliana OX=3702 GN=ELI1 PE=3 SV=1	pentatricopeptide repeat-containing protein At3g29230-like OS=Nelumbo nucifera OX=4432 GN=LOC104604937 PE=4 SV=1	S	Function unknown	PREDICTED: pentatricopeptide repeat-containing protein At3g29230-like [Nelumbo nucifera]
Phoebe_bournei_newGene_11961	--	--	--	K15601|1.8e-11|adu:107494945|K15601 [histone H3]-dimethyl-L-lysine9 demethylase [EC:1.14.11.65] | (RefSeq) lysine-specific demethylase JMJ25	--	--	Myb/SANT-like DNA-binding domain	--	Serine/threonine-protein phosphatase 7 long form OS=Cinnamomum micranthum f. kanehirae OX=337451 GN=CKAN_00130300 PE=4 SV=1	S	Function unknown	serine/threonine-protein phosphatase 7 long form [Cinnamomum micranthum f. kanehirae]
Phoebe_bournei_newGene_3236	--	--	--	--	--	--	Plant transposase (Ptta/En/Spm family)	--	Bromodomain-containing protein 4-like protein isoform X3 OS=Cinnamomum micranthum f. kanehirae OX=337451 GN=CKAN_02014300 PE=4 SV=1	--	--	bromodomain-containing protein 4-like protein isoform X3 [Cinnamomum micranthum f. kanehirae]
Phoebe_bournei_newGene_8068	--	--	Molecular Function: nucleic acid binding (GO:0003676);; Biological Process: DNA integration (GO:0015074);; Molecular Function: hydrolase activity (GO:0016787);;	K11593|9.1e-22|dct:110097550|K11593 eukaryotic translation initiation factor 2C | (RefSeq) protein argonaute 1A-like	[R]	General function prediction only	GAG-pre-integrase domain	--	Retrovirus-related Pol polyprotein from transposon TNT 1-94 OS=Apostasia shenzhenica OX=1088818 GN=AXF42_Ash016611 PE=4 SV=1	L	Replication, recombination and repair	Retrovirus-related Pol polyprotein from transposon TNT 1-94 [Apostasia shenzhenica]
Phoebe_bournei_newGene_3367	[T]	Signal transduction mechanisms	Molecular Function: metal ion binding (GO:0046872);;	--	[TZ]	--	Protein DA1	Protein DA1-related 2 OS=Arabidopsis thaliana OX=3702 GN=DAR2 PE=1 SV=1	Zinc finger protein OS=Cinnamomum micranthum f. kanehirae OX=337451 GN=CKAN_01504100 PE=4 SV=1	--	--	zinc finger protein [Cinnamomum micranthum f. kanehirae]
Phoebe_bournei_newGene_4761	--	--	Cellular Component: integral component of membrane (GO:0016021);; Molecular Function: oxidoreductase activity (GO:0016491);;	K08360|4.9e-61|nnu:104607274|K08360 cytochrome b-561 [EC:7.2.1.3] | (RefSeq) probable transmembrane ascorbate ferrireductase 3	[C]	Energy production and conversion	Eukaryotic cytochrome b561	Probable ascorbate-specific transmembrane electron transporter 1 OS=Oryza sativa subsp. japonica OX=39947 GN=Os02g0642300 PE=3 SV=1	Cytochrome b561 OS=Cinnamomum micranthum f. kanehirae OX=337451 GN=CKAN_02532500 PE=4 SV=1	C	Energy production and conversion	Cytochrome b561 [Cinnamomum micranthum f. kanehirae]
Phoebe_bournei_newGene_9820	[J]	Translation, ribosomal structure and biogenesis	Molecular Function: RNA binding (GO:0003723);; Molecular Function: structural constituent of ribosome (GO:0003735);; Biological Process: translation (GO:0006412);; Cellular Component: large ribosomal subunit (GO:0015934);;	K02865|7.2e-99|mus:103981132|K02865 large subunit ribosomal protein L10Ae | (RefSeq) 60S ribosomal protein L10a	[J]	Translation, ribosomal structure and biogenesis	Ribosomal protein L1p/L10e family	60S ribosomal protein L10a OS=Oryza sativa subsp. indica OX=39946 GN=RPL10A PE=3 SV=1	Ribosomal protein OS=Cinnamomum micranthum f. kanehirae OX=337451 GN=CKAN_01195500 PE=3 SV=1	J	Translation, ribosomal structure and biogenesis	60S ribosomal protein L10a-like protein [Cinnamomum micranthum f. kanehirae]
Phoebe_bournei_newGene_13232	--	--	Molecular Function: ATP binding (GO:0005524);; Molecular Function: kinase activity (GO:0016301);;	K06947|2.2e-144|nnu:104596266|K06947 polynucleotide 5'-hydroxyl-kinase GRC3/NOL9 [EC:2.7.1.-] | (RefSeq) polynucleotide 5'-hydroxyl-kinase NOL9	[R]	General function prediction only	mRNA cleavage and polyadenylation factor CLP1 P-loop	Polynucleotide 5'-hydroxyl-kinase NOL9 OS=Arabidopsis thaliana OX=3702 GN=At5g11010 PE=1 SV=1	Polynucleotide 5'-hydroxyl-kinase NOL9 OS=Cinnamomum micranthum f. kanehirae OX=337451 GN=CKAN_00894600 PE=4 SV=1	S	Function unknown	polynucleotide 5'-hydroxyl-kinase NOL9 [Cinnamomum micranthum f. kanehirae]
Phoebe_bournei_newGene_2267	[O]	Posttranslational modification, protein turnover, chaperones	Molecular Function: molecular_function (GO:0003674);; Molecular Function: catalytic activity (GO:0003824);; Molecular Function: glutathione transferase activity (GO:0004364);; Molecular Function: protein binding (GO:0005515);; Cellular Component: cellular_component (GO:0005575);; Cellular Component: intracellular (GO:0005622);; Cellular Component: obsolete cell (GO:0005623);; Cellular Component: …	K00799|7.7e-86|nsy:104230211|K00799 glutathione S-transferase [EC:2.5.1.18] | (RefSeq) probable glutathione S-transferase	[O]	Posttranslational modification, protein turnover, chaperones	Glutathione S-transferase, N-terminal domain	Glutathione S-transferase U25 OS=Arabidopsis thaliana OX=3702 GN=GSTU25 PE=1 SV=1	GST_C domain-containing protein/GST_N domain-containing protein OS=Cinnamomum micranthum f. kanehirae OX=337451 GN=CKAN_00744300 PE=4 SV=1	O	Posttranslational modification, protein turnover, chaperones	GST_C domain-containing protein/GST_N domain-containing protein [Cinnamomum micranthum f. kanehirae]
Phoebe_bournei_newGene_10876	[R]	General function prediction only	Biological Process: defense response (GO:0006952);; Molecular Function: ADP binding (GO:0043531);;	K13457|9.6e-89|vvi:100854803|K13457 disease resistance protein RPM1 | (RefSeq) disease resistance protein RPM1	[T]	Signal transduction mechanisms	NB-ARC domain	Putative disease resistance protein At1g50180 OS=Arabidopsis thaliana OX=3702 GN=At1g50180 PE=3 SV=2	Putative disease resistance protein OS=Cinnamomum micranthum f. kanehirae OX=337451 GN=CKAN_02642400 PE=4 SV=1	T	Signal transduction mechanisms	putative disease resistance protein [Cinnamomum micranthum f. kanehirae]
Phoebe_bournei_newGene_8128	--	--	Biological Process: sister chromatid cohesion (GO:0007062);; Cellular Component: cohesin complex (GO:0008278);;	K06670|1.2e-58|nnu:104586140|K06670 cohesin complex subunit SCC1 | (RefSeq) sister chromatid cohesion 1 protein 3	[D]	Cell cycle control, cell division, chromosome partitioning	N terminus of Rad21 / Rec8 like protein	Sister chromatid cohesion 1 protein 4 OS=Arabidopsis thaliana OX=3702 GN=SYN4 PE=2 SV=1	Sister chromatid cohesion 1 protein 3 isoform X2 OS=Cinnamomum micranthum f. kanehirae OX=337451 GN=CKAN_00211600 PE=4 SV=1	D	Cell cycle control, cell division, chromosome partitioning	sister chromatid cohesion 1 protein 3 isoform X2 [Cinnamomum micranthum f. kanehirae]
Phoebe_bournei_newGene_802	--	--	--	--	--	--	Protein of unknown function (DUF630)	--	DUF632 domain-containing protein/DUF630 domain-containing protein OS=Cinnamomum micranthum f. kanehirae OX=337451 GN=CKAN_00829800 PE=4 SV=1	S	Function unknown	DUF632 domain-containing protein/DUF630 domain-containing protein [Cinnamomum micranthum f. kanehirae]
Phoebe_bournei_newGene_2315	--	--	--	--	--	--	PPR repeat	--	Uncharacterized protein OS=Cinnamomum micranthum f. kanehirae OX=337451 GN=CKAN_01397400 PE=4 SV=1	--	--	hypothetical protein CKAN_01397400 [Cinnamomum micranthum f. kanehirae]
Phoebe_bournei_newGene_11966	[S]	Function unknown	--	K15015|1.8e-15|aip:107609646|K15015 solute carrier family 32 (vesicular inhibitory amino acid transporter) | (RefSeq) uncharacterized protein LOC107609646 isoform X1	--	--	--	IQ domain-containing protein IQM2 OS=Arabidopsis thaliana OX=3702 GN=IQM2 PE=2 SV=1	IQ domain-containing protein IQM2-like protein OS=Cinnamomum micranthum f. kanehirae OX=337451 GN=CKAN_00617400 PE=4 SV=1	S	Function unknown	IQ domain-containing protein IQM2-like protein [Cinnamomum micranthum f. kanehirae]
Phoebe_bournei_newGene_634	[QV]	--	Molecular Function: iron ion binding (GO:0005506);; Molecular Function: oxidoreductase activity, acting on paired donors, with incorporation or reduction of molecular oxygen (GO:0016705);; Molecular Function: heme binding (GO:0020037);;	K20562|5.4e-121|ccaj:109816364|K20562 biphenyl-4-hydroxylase | (RefSeq) cytochrome P450 CYP736A12-like isoform X1	[Q]	Secondary metabolites biosynthesis, transport and catabolism	Cytochrome P450	Cytochrome P450 71AU50 OS=Prunus mume OX=102107 GN=CYP71AU50 PE=2 SV=1	Cytochrome P450 CYP736A12 OS=Cinnamomum micranthum f. kanehirae OX=337451 GN=CKAN_01272000 PE=3 SV=1	Q	Secondary metabolites biosynthesis, transport and catabolism	cytochrome P450 CYP736A12 [Cinnamomum micranthum f. kanehirae]
Phoebe_bournei_newGene_12875	--	--	--	K01807|4.5e-15|qsu:111984722|K01807 ribose 5-phosphate isomerase A [EC:5.3.1.6] | (RefSeq) probable ribose-5-phosphate isomerase 3, chloroplastic isoform X1	--	--	FAR1 DNA-binding domain	Protein FAR-RED ELONGATED HYPOCOTYL 3 OS=Arabidopsis thaliana OX=3702 GN=FHY3 PE=1 SV=1	FAR1 domain-containing protein (Fragment) OS=Rhododendron williamsianum OX=262921 GN=C3L33_12488 PE=4 SV=1	S	Function unknown	protein FAR-RED IMPAIRED RESPONSE 1-like [Camellia sinensis]
Phoebe_bournei_newGene_8041	--	--	Molecular Function: actin binding (GO:0003779);; Cellular Component: actin cytoskeleton (GO:0015629);; Biological Process: actin filament depolymerization (GO:0030042);;	K05765|9.3e-69|egu:105044457|K05765 cofilin | (RefSeq) actin-depolymerizing factor 7	[Z]	Cytoskeleton	Cofilin/tropomyosin-type actin-binding protein	Actin-depolymerizing factor 7 OS=Oryza sativa subsp. japonica OX=39947 GN=ADF7 PE=3 SV=2	Actin-depolymerizing factor 7 OS=Cinnamomum micranthum f. kanehirae OX=337451 GN=CKAN_02479400 PE=3 SV=1	Z	Cytoskeleton	actin-depolymerizing factor 7 [Cinnamomum micranthum f. kanehirae]
Phoebe_bournei_newGene_3958	--	--	--	--	--	--	N-terminal C2 in EEIG1 and EHBP1 proteins	--	Early endosome antigen 1 OS=Cinnamomum micranthum f. kanehirae OX=337451 GN=CKAN_02105800 PE=4 SV=1	S	Function unknown	early endosome antigen 1 [Cinnamomum micranthum f. kanehirae]
Phoebe_bournei_newGene_9234	--	--	Biological Process: reproduction (GO:0000003);; Biological Process: developmental process involved in reproduction (GO:0003006);; Molecular Function: molecular_function (GO:0003674);; Molecular Function: binding (GO:0005488);; Molecular Function: protein binding (GO:0005515);; Cellular Component: cellular_component (GO:0005575);; Cellular Component: intracellular (GO:0005622);; Cellular Component…	K03188|1.7e-52|dcr:108224146|K03188 urease accessory protein | (RefSeq) uncharacterized protein LOC108224146 isoform X1	--	--	Phloem protein 2	F-box protein At2g02240 OS=Arabidopsis thaliana OX=3702 GN=At2g02240 PE=2 SV=1	F-box protein PP2-B11 OS=Cinnamomum micranthum f. kanehirae OX=337451 GN=CKAN_02599500 PE=4 SV=1	S	Function unknown	F-box protein PP2-B11 [Cinnamomum micranthum f. kanehirae]
Phoebe_bournei_newGene_5124	--	--	Molecular Function: sequence-specific DNA binding (GO:0043565);;	--	[R]	General function prediction only	Translin family	--	Translin-associated protein X OS=Cinnamomum micranthum f. kanehirae OX=337451 GN=CKAN_00314500 PE=3 SV=1	J	Translation, ribosomal structure and biogenesis	translin-associated protein X [Cinnamomum micranthum f. kanehirae]
Phoebe_bournei_newGene_5837	[T]	Signal transduction mechanisms	Molecular Function: protein serine/threonine kinase activity (GO:0004674);; Molecular Function: ATP binding (GO:0005524);; Biological Process: signal transduction (GO:0007165);; Cellular Component: integral component of membrane (GO:0016021);;	K07198|2.1e-157|vvi:100258329|K07198 5'-AMP-activated protein kinase, catalytic alpha subunit [EC:2.7.11.11] | (RefSeq) CIPK16; CBL-interacting protein kinase 16	[T]	Signal transduction mechanisms	Protein kinase domain	CBL-interacting serine/threonine-protein kinase 12 OS=Arabidopsis thaliana OX=3702 GN=CIPK12 PE=1 SV=1	Non-specific serine/threonine protein kinase OS=Cephalotus follicularis OX=3775 GN=CFOL_v3_34350 PE=3 SV=1	T	Signal transduction mechanisms	Pkinase domain-containing protein/NAF domain-containing protein [Cephalotus follicularis]
Phoebe_bournei_newGene_5149	[L]	Replication, recombination and repair	Molecular Function: nucleic acid binding (GO:0003676);; Molecular Function: ATP binding (GO:0005524);;	K14777|1.1e-76|nau:109234358|K14777 ATP-dependent RNA helicase DDX47/RRP3 [EC:3.6.4.13] | (RefSeq) DEAD-box ATP-dependent RNA helicase 10-like	[A]	RNA processing and modification	Helicase conserved C-terminal domain	DEAD-box ATP-dependent RNA helicase 10 OS=Arabidopsis thaliana OX=3702 GN=RH10 PE=1 SV=2	Uncharacterized protein OS=Nyssa sinensis OX=561372 GN=F0562_009857 PE=4 SV=1	A	RNA processing and modification	hypothetical protein F0562_009857 [Nyssa sinensis]
Phoebe_bournei_newGene_4049	--	--	Molecular Function: protein dimerization activity (GO:0046983);;	--	--	--	--	Transcription factor BIM2 OS=Arabidopsis thaliana OX=3702 GN=BIM2 PE=1 SV=1	Transcription factor BIM2 isoform X1 OS=Cinnamomum micranthum f. kanehirae OX=337451 GN=CKAN_01381200 PE=4 SV=1	K	Transcription	transcription factor BIM2 isoform X1 [Cinnamomum micranthum f. kanehirae]
Phoebe_bournei_newGene_4624	--	--	Molecular Function: structural constituent of ribosome (GO:0003735);; Cellular Component: ribosome (GO:0005840);; Biological Process: translation (GO:0006412);;	--	[O]	Posttranslational modification, protein turnover, chaperones	Ribosomal L18 of archaea, bacteria, mitoch. and chloroplast	--	50S ribosomal protein L18 OS=Cinnamomum micranthum f. kanehirae OX=337451 GN=CKAN_00753600 PE=4 SV=1	O	Posttranslational modification, protein turnover, chaperones	50S ribosomal protein L18 [Cinnamomum micranthum f. kanehirae]
Phoebe_bournei_newGene_3273	[M]	Cell wall/membrane/envelope biogenesis	Molecular Function: protein serine/threonine kinase activity (GO:0004674);; Molecular Function: ATP binding (GO:0005524);; Cellular Component: integral component of membrane (GO:0016021);;	K00908|3.5e-145|mesc:110626472|K00908 calcium/calmodulin-dependent protein kinase kinase 1 [EC:2.7.11.17] | (RefSeq) serine/threonine-protein kinase GRIK2	[T]	Signal transduction mechanisms	Protein kinase domain	Serine/threonine-protein kinase GRIK2 OS=Arabidopsis thaliana OX=3702 GN=GRIK2 PE=1 SV=1	Serine/threonine-protein kinase GRIK1 OS=Cinnamomum micranthum f. kanehirae OX=337451 GN=CKAN_01017500 PE=3 SV=1	T	Signal transduction mechanisms	serine/threonine-protein kinase GRIK1 [Cinnamomum micranthum f. kanehirae]
Phoebe_bournei_newGene_12839	--	--	--	K15559|4.7e-114|nnu:104600072|K15559 regulator of Ty1 transposition protein 103 | (RefSeq) histone acetyltransferase KAT6A	[A]	RNA processing and modification	CID domain	--	Regulation of nuclear pre-mRNA domain-containing protein 1A isoform X1 OS=Cinnamomum micranthum f. kanehirae OX=337451 GN=CKAN_01284200 PE=4 SV=1	A	RNA processing and modification	regulation of nuclear pre-mRNA domain-containing protein 1A isoform X1 [Cinnamomum micranthum f. kanehirae]
Phoebe_bournei_newGene_477	--	--	Molecular Function: DNA binding (GO:0003677);; Biological Process: regulation of transcription by RNA polymerase II (GO:0006357);; Molecular Function: protein dimerization activity (GO:0046983);;	--	--	--	Helix-loop-helix DNA-binding domain	Transcription factor bHLH162 OS=Arabidopsis thaliana OX=3702 GN=BHLH162 PE=1 SV=1	Transcription factor bHLH162-like protein isoform X2 OS=Cinnamomum micranthum f. kanehirae OX=337451 GN=CKAN_01446500 PE=4 SV=1	K	Transcription	transcription factor bHLH162-like protein isoform X2 [Cinnamomum micranthum f. kanehirae]
Phoebe_bournei_newGene_3435	--	--	Molecular Function: peroxidase activity (GO:0004601);; Cellular Component: extracellular region (GO:0005576);; Biological Process: response to oxidative stress (GO:0006979);; Molecular Function: heme binding (GO:0020037);; Biological Process: hydrogen peroxide catabolic process (GO:0042744);; Molecular Function: metal ion binding (GO:0046872);;	K00430|2.2e-44|qsu:111993150|K00430 peroxidase [EC:1.11.1.7] | (RefSeq) peroxidase 5-like	--	--	Peroxidase	Peroxidase 5 OS=Vitis vinifera OX=29760 GN=GSVIVT00037159001 PE=1 SV=2	Peroxidase OS=Cinnamomum micranthum f. kanehirae OX=337451 GN=CKAN_02368500 PE=3 SV=1	Q	Secondary metabolites biosynthesis, transport and catabolism	peroxidase 5 [Cinnamomum micranthum f. kanehirae]
Phoebe_bournei_newGene_12040	--	--	--	--	--	--	--	(S)-coclaurine N-methyltransferase OS=Thalictrum flavum subsp. glaucum OX=150095 PE=1 SV=1	Mycolic acid cyclopropane synthase OS=Cinnamomum micranthum f. kanehirae OX=337451 GN=CKAN_00919700 PE=4 SV=1	M	Cell wall/membrane/envelope biogenesis	Mycolic acid cyclopropane synthase [Cinnamomum micranthum f. kanehirae]
Phoebe_bournei_newGene_13181	[I]	Lipid transport and metabolism	Biological Process: lipid metabolic process (GO:0006629);; Molecular Function: O-acyltransferase activity (GO:0008374);;	K22389|5.6e-90|pavi:110768562|K22389 phospholipase A1 [EC:3.1.1.32] | (RefSeq) lecithin-cholesterol acyltransferase-like 4	[I]	Lipid transport and metabolism	Lecithin:cholesterol acyltransferase	Lecithin-cholesterol acyltransferase-like 4 OS=Arabidopsis thaliana OX=3702 GN=LCAT4 PE=1 SV=1	Lecithin-cholesterol acyltransferase-like protein 4 OS=Cinnamomum micranthum f. kanehirae OX=337451 GN=CKAN_01757900 PE=4 SV=1	I	Lipid transport and metabolism	lecithin-cholesterol acyltransferase-like protein 4 [Cinnamomum micranthum f. kanehirae]
Phoebe_bournei_newGene_11329	--	--	--	--	[S]	Function unknown	--	--	Melanoma-associated antigen 1 isoform X1 OS=Cinnamomum micranthum f. kanehirae OX=337451 GN=CKAN_01899400 PE=4 SV=1	S	Function unknown	melanoma-associated antigen 1 isoform X1 [Cinnamomum micranthum f. kanehirae]
Phoebe_bournei_newGene_11239	--	--	--	--	--	--	--	--	Coiled-coil domain-containing protein 136 isoform X2 OS=Cinnamomum micranthum f. kanehirae OX=337451 GN=CKAN_01095100 PE=4 SV=1	--	--	coiled-coil domain-containing protein 136 isoform X2 [Cinnamomum micranthum f. kanehirae]
Phoebe_bournei_newGene_9365	--	--	Cellular Component: integral component of membrane (GO:0016021);;	K23870|1.5e-64|sita:101752622|K23870 putative pectin methyltransferase [EC:2.1.1.-] | (RefSeq) probable pectin methyltransferase QUA2	[S]	Function unknown	Thioredoxin	5'-adenylylsulfate reductase-like 4 OS=Arabidopsis thaliana OX=3702 GN=APRL4 PE=2 SV=1	5'-adenylylsulfate reductase-like protein 4 OS=Cinnamomum micranthum f. kanehirae OX=337451 GN=CKAN_02163800 PE=4 SV=1	S	Function unknown	5'-adenylylsulfate reductase-like protein 4 [Cinnamomum micranthum f. kanehirae]
Phoebe_bournei_newGene_11108	--	--	--	K18469|2.0e-12|dzi:111284993|K18469 TBC1 domain family member 5 | (RefSeq) uncharacterized protein LOC111284993 isoform X1	[U]	Intracellular trafficking, secretion, and vesicular transport	--	--	TBC1 domain-containing protein OS=Cinnamomum micranthum f. kanehirae OX=337451 GN=CKAN_00360200 PE=4 SV=1	U	Intracellular trafficking, secretion, and vesicular transport	TBC1 domain-containing protein [Cinnamomum micranthum f. kanehirae]
Phoebe_bournei_newGene_83	[G]	Carbohydrate transport and metabolism	Molecular Function: chitinase activity (GO:0004568);; Biological Process: chitin catabolic process (GO:0006032);; Biological Process: cell wall macromolecule catabolic process (GO:0016998);;	K20547|6.9e-32|zju:107407210|K20547 basic endochitinase B [EC:3.2.1.14] | (RefSeq) endochitinase-like	[R]	General function prediction only	Chitinase class I	Endochitinase OS=Persea americana OX=3435 GN=chi1 PE=1 SV=2	Class I chitinase OS=Cinnamomum micranthum f. kanehirae OX=337451 GN=CKAN_02487000 PE=4 SV=1	U	Intracellular trafficking, secretion, and vesicular transport	class I chitinase [Cinnamomum micranthum f. kanehirae]
Phoebe_bournei_newGene_7153	--	--	Molecular Function: molecular_function (GO:0003674);; Molecular Function: GTPase activator activity (GO:0005096);; Molecular Function: binding (GO:0005488);; Molecular Function: protein binding (GO:0005515);; Cellular Component: cellular_component (GO:0005575);; Cellular Component: intracellular (GO:0005622);; Cellular Component: obsolete cell (GO:0005623);; Cellular Component: cytoplasm (GO:0005…	K20360|1.1e-125|nnu:104605264|K20360 TBC1 domain family member 2 | (RefSeq) TBC1 domain family member 22B	[U]	Intracellular trafficking, secretion, and vesicular transport	Rab-GTPase-TBC domain	--	TBC1 domain family member 22B OS=Nelumbo nucifera OX=4432 GN=LOC104605264 PE=4 SV=1	U	Intracellular trafficking, secretion, and vesicular transport	PREDICTED: TBC1 domain family member 22B [Nelumbo nucifera]
Phoebe_bournei_newGene_6894	--	--	Molecular Function: protein serine/threonine kinase activity (GO:0004674);; Molecular Function: ATP binding (GO:0005524);;	K08790|1.8e-07|cqi:110689417|K08790 serine/threonine kinase 38 [EC:2.7.11.1] | (RefSeq) serine/threonine-protein kinase tricorner-like	[R]	General function prediction only	--	--	Serine/threonine-protein kinase 38-like protein isoform X1 OS=Cinnamomum micranthum f. kanehirae OX=337451 GN=CKAN_01464800 PE=4 SV=1	--	--	serine/threonine-protein kinase 38-like protein isoform X1 [Cinnamomum micranthum f. kanehirae]
Phoebe_bournei_newGene_4336	--	--	--	--	--	--	--	--	Uncharacterized protein OS=Cinnamomum micranthum f. kanehirae OX=337451 GN=CKAN_02118200 PE=4 SV=1	--	--	hypothetical protein CKAN_02118200 [Cinnamomum micranthum f. kanehirae]
Phoebe_bournei_newGene_8129	--	--	Biological Process: sister chromatid cohesion (GO:0007062);; Cellular Component: cohesin complex (GO:0008278);;	K06670|3.1e-74|egu:105049856|K06670 cohesin complex subunit SCC1 | (RefSeq) sister chromatid cohesion 1 protein 3-like	--	--	Conserved region of Rad21 / Rec8 like protein	Sister chromatid cohesion 1 protein 2 OS=Arabidopsis thaliana OX=3702 GN=SYN2 PE=2 SV=2	Sister chromatid cohesion 1 protein 3 isoform X1 OS=Cinnamomum micranthum f. kanehirae OX=337451 GN=CKAN_00211700 PE=4 SV=1	D	Cell cycle control, cell division, chromosome partitioning	sister chromatid cohesion 1 protein 3 isoform X1 [Cinnamomum micranthum f. kanehirae]
Phoebe_bournei_newGene_11198	--	--	Molecular Function: iron ion binding (GO:0005506);; Biological Process: lipid biosynthetic process (GO:0008610);; Cellular Component: integral component of membrane (GO:0016021);; Molecular Function: oxidoreductase activity (GO:0016491);;	K15404|3.1e-51|egu:105044200|K15404 aldehyde decarbonylase [EC:4.1.99.5] | (RefSeq) protein ECERIFERUM 1-like	--	--	WAX2 C-terminal domain	Very-long-chain aldehyde decarbonylase GL1-1 OS=Oryza sativa subsp. indica OX=39946 GN=GL1-1 PE=3 SV=1	Protein ECERIFERUM 3 OS=Cinnamomum micranthum f. kanehirae OX=337451 GN=CKAN_01132600 PE=3 SV=1	S	Function unknown	protein ECERIFERUM 3 [Cinnamomum micranthum f. kanehirae]
Phoebe_bournei_newGene_13430	--	--	Molecular Function: blue light photoreceptor activity (GO:0009882);;	K12118|1.2e-09|atr:18442888|K12118 cryptochrome 1 | (RefSeq) cryptochrome-1	--	--	Blue/Ultraviolet sensing protein C terminal	--	Cryptochrome 1.2 OS=Cinnamomum micranthum f. kanehirae OX=337451 GN=CKAN_01898600 PE=3 SV=1	--	--	cryptochrome 1.2 [Cinnamomum micranthum f. kanehirae]
Phoebe_bournei_newGene_2292	--	--	Molecular Function: protein kinase activity (GO:0004672);; Molecular Function: ATP binding (GO:0005524);; Cellular Component: integral component of membrane (GO:0016021);;	K16224|1.0e-08|boe:106304564|K16224 senescence-induced receptor-like serine/threonine-protein kinase | (RefSeq) senescence-induced receptor-like serine/threonine-protein kinase	--	--	--	Putative leucine-rich repeat receptor-like protein kinase At2g19210 OS=Arabidopsis thaliana OX=3702 GN=At2g19210 PE=1 SV=1	Putative LRR receptor-like serine/threonine-protein kinase OS=Cinnamomum micranthum f. kanehirae OX=337451 GN=CKAN_00666200 PE=4 SV=1	T	Signal transduction mechanisms	putative LRR receptor-like serine/threonine-protein kinase [Cinnamomum micranthum f. kanehirae]
Phoebe_bournei_newGene_1317	--	--	Molecular Function: peroxidase activity (GO:0004601);; Cellular Component: extracellular region (GO:0005576);; Biological Process: response to oxidative stress (GO:0006979);; Molecular Function: heme binding (GO:0020037);; Biological Process: hydrogen peroxide catabolic process (GO:0042744);; Molecular Function: metal ion binding (GO:0046872);;	K00430|2.7e-143|nnu:104593959|K00430 peroxidase [EC:1.11.1.7] | (RefSeq) peroxidase 72-like	--	--	Peroxidase	Peroxidase 72 OS=Arabidopsis thaliana OX=3702 GN=PER72 PE=1 SV=1	Peroxidase OS=Cinnamomum micranthum f. kanehirae OX=337451 GN=CKAN_00273600 PE=3 SV=1	Q	Secondary metabolites biosynthesis, transport and catabolism	peroxidase 72-like protein [Cinnamomum micranthum f. kanehirae]
Phoebe_bournei_newGene_4715	--	--	Cellular Component: integral component of membrane (GO:0016021);;	K09122|2.0e-23|sbi:8057957|K09122 uncharacterized protein | (RefSeq) uncharacterized protein LOC8057957	--	--	Protein of unknown function (DUF707)	--	Uncharacterized protein OS=Cinnamomum micranthum f. kanehirae OX=337451 GN=CKAN_00898500 PE=4 SV=1	S	Function unknown	hypothetical protein CKAN_00898500 [Cinnamomum micranthum f. kanehirae]
Phoebe_bournei_newGene_6391	--	--	Molecular Function: tubulin binding (GO:0015631);; Molecular Function: ubiquitin protein ligase binding (GO:0031625);; Molecular Function: S100 protein binding (GO:0044548);;	--	--	--	--	Interactor of constitutive active ROPs 4 OS=Arabidopsis thaliana OX=3702 GN=ICR4 PE=1 SV=2	Calcyclin-binding-like protein OS=Cinnamomum micranthum f. kanehirae OX=337451 GN=CKAN_02556800 PE=4 SV=1	S	Function unknown	calcyclin-binding-like protein [Cinnamomum micranthum f. kanehirae]
Phoebe_bournei_newGene_4779	[T]	Signal transduction mechanisms	Molecular Function: phosphorelay sensor kinase activity (GO:0000155);; Cellular Component: integral component of membrane (GO:0016021);;	K14489|3.9e-278|vvi:100263145|K14489 arabidopsis histidine kinase 2/3/4 (cytokinin receptor) [EC:2.7.13.3] | (RefSeq) CYT1; histidine kinase 2	[T]	Signal transduction mechanisms	CHASE domain	Histidine kinase 2 OS=Arabidopsis thaliana OX=3702 GN=AHK2 PE=1 SV=1	Histidine kinase OS=Cinnamomum micranthum f. kanehirae OX=337451 GN=CKAN_02536600 PE=4 SV=1	T	Signal transduction mechanisms	Signal transduction response regulator [Cinnamomum micranthum f. kanehirae]
Phoebe_bournei_newGene_9599	--	--	Molecular Function: protein kinase activity (GO:0004672);; Molecular Function: calcium ion binding (GO:0005509);; Molecular Function: ATP binding (GO:0005524);; Cellular Component: integral component of membrane (GO:0016021);; Molecular Function: polysaccharide binding (GO:0030247);;	--	--	--	--	--	Putative ATP binding protein OS=Cinnamomum micranthum f. kanehirae OX=337451 GN=CKAN_00290800 PE=4 SV=1	T	Signal transduction mechanisms	putative ATP binding protein [Cinnamomum micranthum f. kanehirae]
Phoebe_bournei_newGene_9226	--	--	--	K21437|3.8e-306|nnu:104602832|K21437 ankyrin repeat domain-containing protein 13 | (RefSeq) ankyrin repeat domain-containing protein 13C-like	[R]	General function prediction only	GPCR-chaperone	--	Ankyrin repeat domain-containing protein 13C-like protein OS=Cinnamomum micranthum f. kanehirae OX=337451 GN=CKAN_02600700 PE=4 SV=1	--	--	ankyrin repeat domain-containing protein 13C-like protein [Cinnamomum micranthum f. kanehirae]
Phoebe_bournei_newGene_7166	--	--	Molecular Function: double-stranded DNA binding (GO:0003690);; Cellular Component: DNA topoisomerase type II (double strand cut, ATP-hydrolyzing) complex (GO:0009330);; Biological Process: DNA endoreduplication (GO:0042023);;	--	--	--	--	DNA-binding protein BIN4 OS=Arabidopsis thaliana OX=3702 GN=BIN4 PE=1 SV=2	DNA-binding protein BIN4 isoform X4 OS=Cinnamomum micranthum f. kanehirae OX=337451 GN=CKAN_01138700 PE=4 SV=1	S	Function unknown	DNA-binding protein BIN4 isoform X4 [Cinnamomum micranthum f. kanehirae]
Phoebe_bournei_newGene_10865	--	--	Molecular Function: nucleic acid binding (GO:0003676);; Biological Process: DNA integration (GO:0015074);;	K12349|2.4e-74|ccaj:109806181|K12349 neutral ceramidase [EC:3.5.1.23] | (RefSeq) neutral ceramidase-like	[R]	General function prediction only	Integrase core domain	--	RNA-directed DNA polymerase OS=Vitis vinifera OX=29760 GN=VITISV_036155 PE=4 SV=1	L	Replication, recombination and repair	Transposon Tf2-12 polyprotein [Vitis vinifera]
Phoebe_bournei_newGene_749	--	--	Molecular Function: protein kinase activity (GO:0004672);; Molecular Function: ATP binding (GO:0005524);; Cellular Component: integral component of membrane (GO:0016021);;	K13418|3.8e-50|ppp:112280019|K13418 somatic embryogenesis receptor kinase 1 [EC:2.7.10.1 2.7.11.1] | (RefSeq) LRR receptor kinase BAK1-like	--	--	Protein kinase domain	Rust resistance kinase Lr10 OS=Triticum aestivum OX=4565 GN=LRK10 PE=2 SV=1	Rust resistance kinase Lr10 isoform X1 OS=Cinnamomum micranthum f. kanehirae OX=337451 GN=CKAN_02275500 PE=4 SV=1	T	Signal transduction mechanisms	rust resistance kinase Lr10 isoform X1 [Cinnamomum micranthum f. kanehirae]
Phoebe_bournei_newGene_6975	[O]	Posttranslational modification, protein turnover, chaperones	Molecular Function: serine-type endopeptidase activity (GO:0004252);;	--	--	--	PA domain	Subtilisin-like protease SBT3.8 OS=Arabidopsis thaliana OX=3702 GN=SBT3.8 PE=3 SV=1	Peptidase S8/S53 domain-containing protein OS=Cinnamomum micranthum f. kanehirae OX=337451 GN=CKAN_01666000 PE=3 SV=1	O	Posttranslational modification, protein turnover, chaperones	Peptidase S8/S53 domain-containing protein [Cinnamomum micranthum f. kanehirae]
Phoebe_bournei_newGene_1508	[R]	General function prediction only	Biological Process: defense response (GO:0006952);; Molecular Function: ADP binding (GO:0043531);;	K13457|5.2e-93|gmx:100819372|K13457 disease resistance protein RPM1 | (RefSeq) disease resistance protein RPM1	[T]	Signal transduction mechanisms	NB-ARC domain	Disease resistance protein RPP13 OS=Arabidopsis thaliana OX=3702 GN=RPP13 PE=2 SV=2	Putative disease resistance protein OS=Cinnamomum micranthum f. kanehirae OX=337451 GN=CKAN_02642400 PE=4 SV=1	T	Signal transduction mechanisms	putative disease resistance protein [Cinnamomum micranthum f. kanehirae]
Phoebe_bournei_newGene_1143	--	--	Molecular Function: calcium ion binding (GO:0005509);; Cellular Component: endoplasmic reticulum lumen (GO:0005788);; Biological Process: protein folding (GO:0006457);; Cellular Component: integral component of membrane (GO:0016021);; Molecular Function: unfolded protein binding (GO:0051082);;	K08057|3.3e-173|dct:110096951|K08057 calreticulin | (RefSeq) calreticulin-3-like	[O]	Posttranslational modification, protein turnover, chaperones	Calreticulin family	Calreticulin-3 OS=Arabidopsis thaliana OX=3702 GN=CRT3 PE=1 SV=2	Calreticulin OS=Cinnamomum micranthum f. kanehirae OX=337451 GN=CKAN_01266500 PE=3 SV=1	O	Posttranslational modification, protein turnover, chaperones	Calreticulin-3 [Cinnamomum micranthum f. kanehirae]
Phoebe_bournei_newGene_9236	--	--	--	K03188|2.2e-34|dcr:108224146|K03188 urease accessory protein | (RefSeq) uncharacterized protein LOC108224146 isoform X1	--	--	Phloem protein 2	F-box protein At2g02240 OS=Arabidopsis thaliana OX=3702 GN=At2g02240 PE=2 SV=1	Putative F-box protein PP2-B12 OS=Cinnamomum micranthum f. kanehirae OX=337451 GN=CKAN_02599300 PE=4 SV=1	S	Function unknown	putative F-box protein PP2-B12 [Cinnamomum micranthum f. kanehirae]
Phoebe_bournei_newGene_896	[I]	Lipid transport and metabolism	--	K13544|1.5e-53|boe:106311503|K13544 pheophorbidase [EC:3.1.1.82] | (RefSeq) pheophorbidase-like	--	--	Alpha/beta hydrolase family	Methylesterase 17 OS=Arabidopsis thaliana OX=3702 GN=MES17 PE=1 SV=1	Methylesterase 17-like protein OS=Cinnamomum micranthum f. kanehirae OX=337451 GN=CKAN_00916000 PE=4 SV=1	S	Function unknown	methylesterase 17-like protein [Cinnamomum micranthum f. kanehirae]
Phoebe_bournei_newGene_5688	--	--	Molecular Function: zinc ion binding (GO:0008270);; Cellular Component: integral component of membrane (GO:0016021);;	--	--	--	GRF zinc finger	--	GRF-type domain-containing protein OS=Cinnamomum micranthum f. kanehirae OX=337451 GN=CKAN_00521900 PE=4 SV=1	--	--	hypothetical protein CKAN_00521900 [Cinnamomum micranthum f. kanehirae]
Phoebe_bournei_newGene_11006	--	--	Molecular Function: ubiquitin-protein transferase activity (GO:0004842);; Molecular Function: metal ion binding (GO:0046872);;	K11975|1.1e-95|pper:18783677|K11975 E3 ubiquitin-protein ligase RNF144 [EC:2.3.2.31] | (RefSeq) probable E3 ubiquitin-protein ligase RNF217	[O]	Posttranslational modification, protein turnover, chaperones	IBR domain, a half RING-finger domain	--	Zinc finger, RING-type OS=Cinnamomum micranthum f. kanehirae OX=337451 GN=CKAN_00801500 PE=3 SV=1	O	Posttranslational modification, protein turnover, chaperones	Zinc finger, RING-type [Cinnamomum micranthum f. kanehirae]
Phoebe_bournei_newGene_13439	--	--	Cellular Component: photosystem II oxygen evolving complex (GO:0009654);; Biological Process: photosynthesis (GO:0015979);; Cellular Component: integral component of membrane (GO:0016021);;	K03541|9.2e-61|nnu:104588920|K03541 photosystem II 10kDa protein | (RefSeq) photosystem II 10 kDa polypeptide, chloroplastic	--	--	Photosystem II 10 kDa polypeptide PsbR	Photosystem II 10 kDa polypeptide, chloroplastic OS=Solanum tuberosum OX=4113 GN=PSBR PE=2 SV=1	Photosystem II 10 kDa polypeptide, chloroplastic OS=Cinnamomum micranthum f. kanehirae OX=337451 GN=CKAN_01776700 PE=3 SV=1	S	Function unknown	photosystem II polypeptide, chloroplastic [Cinnamomum micranthum f. kanehirae]
Phoebe_bournei_newGene_7031	[O]	Posttranslational modification, protein turnover, chaperones	--	K13993|3.3e-68|nnu:104592981|K13993 HSP20 family protein | (RefSeq) small heat shock protein, chloroplastic-like	[O]	Posttranslational modification, protein turnover, chaperones	Hsp20/alpha crystallin family	Small heat shock protein, chloroplastic (Fragment) OS=Glycine max OX=3847 GN=HSP22 PE=2 SV=1	Alpha crystallin/Hsp20 domain-containing protein OS=Cinnamomum micranthum f. kanehirae OX=337451 GN=CKAN_00029200 PE=3 SV=1	O	Posttranslational modification, protein turnover, chaperones	Alpha crystallin/Hsp20 domain-containing protein [Cinnamomum micranthum f. kanehirae]
Phoebe_bournei_newGene_827	--	--	Molecular Function: RNA-directed DNA polymerase activity (GO:0003964);;	--	[R]	General function prediction only	Retroviral aspartyl protease	--	Endonuclease OS=Cinnamomum micranthum f. kanehirae OX=337451 GN=CKAN_01521600 PE=3 SV=1	L	Replication, recombination and repair	reverse transcriptase [Cinnamomum micranthum f. kanehirae]
Phoebe_bournei_newGene_8156	--	--	Molecular Function: protein kinase activity (GO:0004672);; Molecular Function: calcium ion binding (GO:0005509);; Molecular Function: ATP binding (GO:0005524);; Cellular Component: integral component of membrane (GO:0016021);; Molecular Function: polysaccharide binding (GO:0030247);;	--	--	--	--	Wall-associated receptor kinase-like 8 OS=Arabidopsis thaliana OX=3702 GN=WAKL8 PE=2 SV=1	Putative wall-associated receptor kinase-like protein 16 OS=Cinnamomum micranthum f. kanehirae OX=337451 GN=CKAN_00292100 PE=4 SV=1	T	Signal transduction mechanisms	putative wall-associated receptor kinase-like protein 16 [Cinnamomum micranthum f. kanehirae]
Phoebe_bournei_newGene_10290	--	--	Molecular Function: protein serine/threonine kinase activity (GO:0004674);; Molecular Function: ATP binding (GO:0005524);; Cellular Component: integral component of membrane (GO:0016021);; Molecular Function: carbohydrate binding (GO:0030246);; Biological Process: recognition of pollen (GO:0048544);;	K13416|8.1e-50|qsu:112022898|K13416 brassinosteroid insensitive 1-associated receptor kinase 1 [EC:2.7.10.1 2.7.11.1] | (RefSeq) BRASSINOSTEROID INSENSITIVE 1-associated receptor kinase 1-like	--	--	Protein kinase domain	G-type lectin S-receptor-like serine/threonine-protein kinase At2g19130 OS=Arabidopsis thaliana OX=3702 GN=At2g19130 PE=2 SV=1	Receptor-like serine/threonine-protein kinase OS=Cinnamomum micranthum f. kanehirae OX=337451 GN=CKAN_02008100 PE=3 SV=1	T	Signal transduction mechanisms	G-type lectin S-receptor-like serine/threonine-protein kinase At2g19130 isoform X2 [Quercus lobata]
Phoebe_bournei_newGene_12941	--	--	Molecular Function: cysteine-type peptidase activity (GO:0008234);;	K16290|9.0e-21|qsu:112002930|K16290 xylem cysteine proteinase [EC:3.4.22.-] | (RefSeq) cysteine protease XCP1-like	[O]	Posttranslational modification, protein turnover, chaperones	Cathepsin propeptide inhibitor domain (I29)	Cysteine protease XCP1 OS=Arabidopsis thaliana OX=3702 GN=XCP1 PE=1 SV=1	Peptidase C1A OS=Cinnamomum micranthum f. kanehirae OX=337451 GN=CKAN_00213100 PE=3 SV=1	O	Posttranslational modification, protein turnover, chaperones	Peptidase C1A [Cinnamomum micranthum f. kanehirae]
Phoebe_bournei_newGene_9110	--	--	--	--	--	--	--	--	Mutator-like protein transposase OS=Cinnamomum micranthum f. kanehirae OX=337451 GN=CKAN_00734900 PE=4 SV=1	--	--	Mutator-like protein transposase [Cinnamomum micranthum f. kanehirae]
Phoebe_bournei_newGene_12275	--	--	Molecular Function: transferase activity, transferring glycosyl groups (GO:0016757);;	K23869|7.4e-193|nnu:104603843|K23869 galactan beta-1,4-galactosyltransferase [EC:2.4.1.-] | (RefSeq) galactan beta-1,4-galactosyltransferase GALS1	[S]	Function unknown	Glycosyltransferase family 92	Galactan beta-1,4-galactosyltransferase GALS1 OS=Arabidopsis thaliana OX=3702 GN=GALS1 PE=2 SV=2	Glycosyltransferase family 92 protein OS=Cinnamomum micranthum f. kanehirae OX=337451 GN=CKAN_00102000 PE=3 SV=1	S	Function unknown	galactan beta-1,4-galactosyltransferase GALS1 [Cinnamomum micranthum f. kanehirae]
Phoebe_bournei_newGene_8046	--	--	--	--	[S]	Function unknown	Putative zinc-finger domain	--	SiRNA-mediated silencing protein NRDE-2 OS=Cinnamomum micranthum f. kanehirae OX=337451 GN=CKAN_02478900 PE=4 SV=1	S	Function unknown	siRNA-mediated silencing protein NRDE-2 [Cinnamomum micranthum f. kanehirae]
Phoebe_bournei_newGene_521	[IR]	--	Cellular Component: integral component of membrane (GO:0016021);; Molecular Function: oxidoreductase activity, acting on CH-OH group of donors (GO:0016614);; Molecular Function: flavin adenine dinucleotide binding (GO:0050660);;	K17756|1.2e-06|aof:109836233|K17756 long-chain-alcohol oxidase [EC:1.1.3.20] | (RefSeq) long-chain-alcohol oxidase FAO2-like	--	--	GMC oxidoreductase	Long-chain-alcohol oxidase FAO4B OS=Arabidopsis thaliana OX=3702 GN=FAO4B PE=2 SV=2	4Fe-4S ferredoxin-type domain-containing protein OS=Cinnamomum micranthum f. kanehirae OX=337451 GN=CKAN_01235500 PE=4 SV=1	E	Amino acid transport and metabolism	hypothetical protein CKAN_01235500 [Cinnamomum micranthum f. kanehirae]
Phoebe_bournei_newGene_5247	--	--	Molecular Function: protein serine/threonine kinase activity (GO:0004674);; Molecular Function: ATP binding (GO:0005524);;	K00924|5.8e-107|boe:106307512|K00924 kinase [EC:2.7.1.-] | (RefSeq) probable receptor-like protein kinase At3g55450 isoform X1	[T]	Signal transduction mechanisms	Protein tyrosine and serine/threonine kinase	Probable serine/threonine-protein kinase PBL17 OS=Arabidopsis thaliana OX=3702 GN=PBL17 PE=1 SV=1	Serine/threonine-protein kinase isoform X1 OS=Cinnamomum micranthum f. kanehirae OX=337451 GN=CKAN_02071900 PE=3 SV=1	T	Signal transduction mechanisms	serine/threonine-protein kinase isoform X1 [Cinnamomum micranthum f. kanehirae]
Phoebe_bournei_newGene_7707	--	--	Molecular Function: hydrolase activity, acting on ester bonds (GO:0016788);;	--	--	--	--	GDSL esterase/lipase At1g31550 OS=Arabidopsis thaliana OX=3702 GN=At1g31550 PE=2 SV=1	GDSL esterase/lipase OS=Cinnamomum micranthum f. kanehirae OX=337451 GN=CKAN_02574500 PE=3 SV=1	S	Function unknown	GDSL esterase/lipase [Cinnamomum micranthum f. kanehirae]
Phoebe_bournei_newGene_3176	[R]	General function prediction only	Molecular Function: GTPase activity (GO:0003924);; Molecular Function: GTP binding (GO:0005525);; Biological Process: Rab protein signal transduction (GO:0032482);;	K07890|2.0e-96|nnu:104602488|K07890 Ras-related protein Rab-21 | (RefSeq) ras-related protein Rab-21-like	[R]	General function prediction only	Ras family	Ras-related protein RABF2b OS=Arabidopsis thaliana OX=3702 GN=RABF2B PE=1 SV=1	Ras-related protein Rab-21 OS=Cinnamomum micranthum f. kanehirae OX=337451 GN=CKAN_00992500 PE=4 SV=1	U	Intracellular trafficking, secretion, and vesicular transport	Small GTPase superfamily [Cinnamomum micranthum f. kanehirae]
Phoebe_bournei_newGene_8563	--	--	Cellular Component: Golgi membrane (GO:0000139);; Biological Process: protein glycosylation (GO:0006486);; Cellular Component: integral component of membrane (GO:0016021);; Molecular Function: transferase activity, transferring glycosyl groups (GO:0016757);;	--	--	--	--	--	Hexosyltransferase OS=Cinnamomum micranthum f. kanehirae OX=337451 GN=CKAN_02572900 PE=3 SV=1	G	Carbohydrate transport and metabolism	Glycosyl transferase [Cinnamomum micranthum f. kanehirae]
Phoebe_bournei_newGene_2423	--	--	Molecular Function: ligand-gated ion channel activity (GO:0015276);; Cellular Component: integral component of membrane (GO:0016021);;	K05387|7.3e-29|nnu:104607030|K05387 glutamate receptor, ionotropic, plant | (RefSeq) glutamate receptor 2.8-like	[PET]	--	--	Glutamate receptor 2.1 OS=Arabidopsis thaliana OX=3702 GN=GLR2.1 PE=2 SV=2	Glutamate receptor 2.8-like protein isoform X1 OS=Cinnamomum micranthum f. kanehirae OX=337451 GN=CKAN_02051400 PE=4 SV=1	--	--	glutamate receptor 2.8-like protein isoform X1 [Cinnamomum micranthum f. kanehirae]
Phoebe_bournei_newGene_6496	--	--	Molecular Function: small molecule binding (GO:0036094);;	--	[M]	Cell wall/membrane/envelope biogenesis	Lipocalin-like domain	Chloroplastic lipocalin OS=Arabidopsis thaliana OX=3702 GN=CHL PE=1 SV=1	Lipocalin/cytosolic fatty-acid binding domain-containing protein OS=Cinnamomum micranthum f. kanehirae OX=337451 GN=CKAN_01743100 PE=3 SV=1	M	Cell wall/membrane/envelope biogenesis	Lipocalin/cytosolic fatty-acid binding domain-containing protein [Cinnamomum micranthum f. kanehirae]
Phoebe_bournei_newGene_2004	--	--	Molecular Function: zinc ion binding (GO:0008270);;	K22733|1.0e-143|cit:102612526|K22733 magnesium transporter | (RefSeq) uncharacterized protein LOC102612526	[R]	General function prediction only	PPR repeat	Putative pentatricopeptide repeat-containing protein At3g25060, mitochondrial OS=Arabidopsis thaliana OX=3702 GN=PCMP-E96 PE=3 SV=1	Pentatricopeptide repeat-containing protein OS=Actinidia chinensis var. chinensis OX=1590841 GN=CEY00_Acc31971 PE=3 SV=1	S	Function unknown	Pentatricopeptide repeat-containing protein [Actinidia chinensis var. chinensis]
Phoebe_bournei_newGene_4016	--	--	Molecular Function: molecular_function (GO:0003674);; Molecular Function: nucleic acid binding (GO:0003676);; Molecular Function: RNA binding (GO:0003723);; Molecular Function: catalytic activity (GO:0003824);; Molecular Function: nuclease activity (GO:0004518);; Molecular Function: endonuclease activity (GO:0004519);; Molecular Function: binding (GO:0005488);; Cellular Component: cellular_compon…	K22733|4.7e-21|cit:102612526|K22733 magnesium transporter | (RefSeq) uncharacterized protein LOC102612526	[R]	General function prediction only	PPR repeat family	Pentatricopeptide repeat-containing protein At1g22830 OS=Arabidopsis thaliana OX=3702 GN=PCMP-E24 PE=2 SV=1	Uncharacterized protein OS=Morus notabilis OX=981085 GN=L484_021329 PE=4 SV=1	S	Function unknown	putative pentatricopeptide repeat-containing protein [Tripterygium wilfordii]
Phoebe_bournei_newGene_4724	[GI]	--	Molecular Function: enzyme inhibitor activity (GO:0004857);; Cellular Component: integral component of membrane (GO:0016021);; Molecular Function: pectinesterase activity (GO:0030599);; Biological Process: cell wall modification (GO:0042545);; Molecular Function: aspartyl esterase activity (GO:0045330);;	K01051|1.4e-189|nnu:104609248|K01051 pectinesterase [EC:3.1.1.11] | (RefSeq) pectinesterase/pectinesterase inhibitor PPE8B	--	--	Pectinesterase	Pectinesterase/pectinesterase inhibitor PPE8B OS=Prunus persica OX=3760 PE=2 SV=1	Pectinesterase OS=Cinnamomum micranthum f. kanehirae OX=337451 GN=CKAN_02518100 PE=3 SV=1	G	Carbohydrate transport and metabolism	pectinesterase/pectinesterase inhibitor PPE8B [Cinnamomum micranthum f. kanehirae]
Phoebe_bournei_newGene_1034	--	--	Biological Process: reproduction (GO:0000003);; Biological Process: developmental process involved in reproduction (GO:0003006);; Molecular Function: molecular_function (GO:0003674);; Molecular Function: nucleic acid binding (GO:0003676);; Molecular Function: RNA binding (GO:0003723);; Molecular Function: catalytic activity (GO:0003824);; Molecular Function: nuclease activity (GO:0004518);; Molec…	K17710|7.9e-07|zma:100273524|K17710 pentatricopeptide repeat domain-containing protein 1 | (RefSeq) si486067f01; uncharacterized protein LOC100273524	[R]	General function prediction only	PPR repeat family	Pentatricopeptide repeat-containing protein At1g10270 OS=Arabidopsis thaliana OX=3702 GN=GRP23 PE=1 SV=1	Pentatricopeptide repeat-containing-like protein OS=Cinnamomum micranthum f. kanehirae OX=337451 GN=CKAN_02192100 PE=4 SV=1	M	Cell wall/membrane/envelope biogenesis	pentatricopeptide repeat-containing-like protein [Cinnamomum micranthum f. kanehirae]
Phoebe_bournei_newGene_8696	--	--	--	--	--	--	--	--	Uncharacterized protein OS=Zea mays OX=4577 PE=2 SV=1	--	--	PREDICTED: uncharacterized protein LOC105953700 [Erythranthe guttata]
Phoebe_bournei_newGene_1286	--	--	Molecular Function: UDP-glycosyltransferase activity (GO:0008194);;	K13692|2.3e-57|eus:EUTSA_v10007593mg|K13692 UDP-glucose:(indol-3-yl)acetate beta-D-glucosyltransferase [EC:2.4.1.121] | (RefSeq) hypothetical protein	[GC]	--	UDP-glucoronosyl and UDP-glucosyl transferase	UDP-glycosyltransferase 75C1 OS=Solanum lycopersicum OX=4081 GN=UGT75C1 PE=1 SV=1	Crocetin glucosyltransferase, chloroplastic-like protein OS=Cinnamomum micranthum f. kanehirae OX=337451 GN=CKAN_01608400 PE=3 SV=1	--	--	crocetin glucosyltransferase, chloroplastic-like protein [Cinnamomum micranthum f. kanehirae]
Phoebe_bournei_newGene_72	[O]	Posttranslational modification, protein turnover, chaperones	Molecular Function: ATP binding (GO:0005524);; Biological Process: protein folding (GO:0006457);; Molecular Function: unfolded protein binding (GO:0051082);;	K04079|0.0e+00|nnu:104589805|K04079 molecular chaperone HtpG | (RefSeq) heat shock cognate protein 80	[O]	Posttranslational modification, protein turnover, chaperones	Hsp90 protein	Heat shock protein 81-1 OS=Oryza sativa subsp. indica OX=39946 GN=HSP81-1 PE=2 SV=1	Heat shock cognate protein 80 OS=Cinnamomum micranthum f. kanehirae OX=337451 GN=CKAN_02490200 PE=3 SV=1	O	Posttranslational modification, protein turnover, chaperones	heat shock cognate protein 80 [Cinnamomum micranthum f. kanehirae]
Phoebe_bournei_newGene_13098	[J]	Translation, ribosomal structure and biogenesis	Molecular Function: RNA binding (GO:0003723);; Molecular Function: structural constituent of ribosome (GO:0003735);; Cellular Component: cytosolic large ribosomal subunit (GO:0022625);;	K02908|2.9e-57|cam:101511841|K02908 large subunit ribosomal protein L30e | (RefSeq) 60S ribosomal protein L30	[J]	Translation, ribosomal structure and biogenesis	Ribosomal protein L7Ae/L30e/S12e/Gadd45 family	60S ribosomal protein L30 OS=Lupinus luteus OX=3873 GN=RPL30 PE=3 SV=1	Ribosomal protein L30e OS=Cinnamomum micranthum f. kanehirae OX=337451 GN=CKAN_00829700 PE=3 SV=1	J	Translation, ribosomal structure and biogenesis	Ribosomal protein L30e [Cinnamomum micranthum f. kanehirae]
Phoebe_bournei_newGene_123	--	--	Cellular Component: integral component of membrane (GO:0016021);;	--	--	--	--	Tobamovirus multiplication protein 2A OS=Arabidopsis thaliana OX=3702 GN=TOM2A PE=1 SV=1	Tobamovirus multiplication protein 2A-like protein OS=Cinnamomum micranthum f. kanehirae OX=337451 GN=CKAN_01880600 PE=4 SV=1	S	Function unknown	tobamovirus multiplication protein 2A-like protein [Cinnamomum micranthum f. kanehirae]
Phoebe_bournei_newGene_8412	--	--	--	K14318|9.7e-12|aof:109831087|K14318 nuclear pore complex protein Nup88 | (RefSeq) LOW QUALITY PROTEIN: nuclear pore complex protein NUP88	[L]	Replication, recombination and repair	DDE superfamily endonuclease	--	Putative myb/SANT-like domain-containing protein OS=Cinnamomum micranthum f. kanehirae OX=337451 GN=CKAN_00469600 PE=3 SV=1	L	Replication, recombination and repair	putative myb/SANT-like domain-containing protein [Cinnamomum micranthum f. kanehirae]
Phoebe_bournei_newGene_11823	--	--	Molecular Function: structural constituent of cell wall (GO:0005199);;	--	--	--	Extensin-like protein repeat	--	--	--	--	--
Phoebe_bournei_newGene_12382	--	--	--	--	--	--	--	(S)-coclaurine N-methyltransferase OS=Thalictrum flavum subsp. glaucum OX=150095 PE=1 SV=1	Mycolic acid cyclopropane synthase OS=Cinnamomum micranthum f. kanehirae OX=337451 GN=CKAN_00919700 PE=4 SV=1	M	Cell wall/membrane/envelope biogenesis	Mycolic acid cyclopropane synthase [Cinnamomum micranthum f. kanehirae]
Phoebe_bournei_newGene_3227	--	--	Molecular Function: double-stranded DNA binding (GO:0003690);; Biological Process: regulation of transcription, DNA-templated (GO:0006355);;	K15032|7.2e-80|qsu:111992495|K15032 mTERF domain-containing protein, mitochondrial | (RefSeq) uncharacterized protein LOC111992495	[KR]	--	mTERF	--	Mitochodrial transcription termination factor-related OS=Cinnamomum micranthum f. kanehirae OX=337451 GN=CKAN_01004400 PE=3 SV=1	K	Transcription	Mitochodrial transcription termination factor-related [Cinnamomum micranthum f. kanehirae]
Phoebe_bournei_newGene_6279	--	--	Molecular Function: DNA binding (GO:0003677);;	K21596|8.7e-291|nnu:104598807|K21596 calmodulin-binding transcription activator | (RefSeq) calmodulin-binding transcription activator 5	[S]	Function unknown	CG-1 domain	Calmodulin-binding transcription activator 5 OS=Arabidopsis thaliana OX=3702 GN=CAMTA5 PE=2 SV=2	Calmodulin-binding transcription activator 5 isoform X2 OS=Cinnamomum micranthum f. kanehirae OX=337451 GN=CKAN_02453900 PE=3 SV=1	S	Function unknown	calmodulin-binding transcription activator 5 isoform X2 [Cinnamomum micranthum f. kanehirae]
Phoebe_bournei_newGene_11692	--	--	Cellular Component: commitment complex (GO:0000243);; Biological Process: spliceosomal complex assembly (GO:0000245);; Biological Process: RNA splicing, via transesterification reactions (GO:0000375);; Biological Process: RNA splicing, via transesterification reactions with bulged adenosine as nucleophile (GO:0000377);; Biological Process: mRNA 5'-splice site recognition (GO:0000395);; Biological…	K13217|1.2e-222|nnu:104590454|K13217 pre-mRNA-processing factor 39 | (RefSeq) uncharacterized LOC104590454	[A]	RNA processing and modification	Tetratricopeptide repeat	--	uncharacterized protein LOC104590454 isoform X1 OS=Nelumbo nucifera OX=4432 GN=LOC104590454 PE=4 SV=1	A	RNA processing and modification	PREDICTED: uncharacterized protein LOC104590454 isoform X1 [Nelumbo nucifera]
Phoebe_bournei_newGene_9065	--	--	--	--	--	--	--	--	Uncharacterized protein OS=Acer yangbiense OX=1000413 GN=EZV62_027951 PE=4 SV=1	S	Function unknown	hypothetical protein EZV62_027951 [Acer yangbiense]
Phoebe_bournei_newGene_5174	--	--	Molecular Function: DNA binding (GO:0003677);; Biological Process: regulation of transcription by RNA polymerase II (GO:0006357);; Molecular Function: protein dimerization activity (GO:0046983);;	--	--	--	--	--	Transcription factor bHLH162-like protein OS=Cinnamomum micranthum f. kanehirae OX=337451 GN=CKAN_01070800 PE=4 SV=1	K	Transcription	transcription factor bHLH162-like protein [Cinnamomum micranthum f. kanehirae]
Phoebe_bournei_newGene_8393	--	--	Molecular Function: hydrolase activity, hydrolyzing O-glycosyl compounds (GO:0004553);; Cellular Component: cell wall (GO:0005618);; Biological Process: xyloglucan metabolic process (GO:0010411);; Molecular Function: xyloglucan:xyloglucosyl transferase activity (GO:0016762);; Biological Process: cell wall biogenesis (GO:0042546);; Cellular Component: apoplast (GO:0048046);; Biological Process: ce…	K14504|1.4e-30|jcu:105635614|K14504 xyloglucan:xyloglucosyl transferase TCH4 [EC:2.4.1.207] | (RefSeq) xyloglucan endotransglucosylase/hydrolase protein 22	--	--	Glycosyl hydrolases family 16	Probable xyloglucan endotransglucosylase/hydrolase protein 23 OS=Arabidopsis thaliana OX=3702 GN=XTH23 PE=2 SV=1	Xyloglucan endotransglucosylase/hydrolase OS=Cinnamomum micranthum f. kanehirae OX=337451 GN=CKAN_00365000 PE=3 SV=1	G	Carbohydrate transport and metabolism	putative xyloglucan endotransglucosylase/hydrolase protein 23 [Cinnamomum micranthum f. kanehirae]
Phoebe_bournei_newGene_1099	--	--	--	K09571|5.3e-18|bna:106435913|K09571 FK506-binding protein 4/5 [EC:5.2.1.8] | (RefSeq) LOW QUALITY PROTEIN: 70 kDa peptidyl-prolyl isomerase-like	[R]	General function prediction only	gag-polypeptide of LTR copia-type	--	Retrotran_gag_3 domain-containing protein OS=Corchorus capsularis OX=210143 GN=CCACVL1_13538 PE=4 SV=1	J	Translation, ribosomal structure and biogenesis	hypothetical protein CCACVL1_13538 [Corchorus capsularis]
Phoebe_bournei_newGene_5546	--	--	Cellular Component: integral component of membrane (GO:0016021);; Molecular Function: myosin binding (GO:0017022);;	K11844|3.1e-17|cmo:103483482|K11844 ubiquitin carboxyl-terminal hydrolase 16/45 [EC:3.4.19.12] | (RefSeq) ubiquitin carboxyl-terminal hydrolase 2	--	--	Zein-binding	Myosin-binding protein 2 OS=Arabidopsis thaliana OX=3702 GN=MYOB2 PE=1 SV=1	Myosin-binding protein 2 OS=Cinnamomum micranthum f. kanehirae OX=337451 GN=CKAN_00338000 PE=4 SV=1	S	Function unknown	myosin-binding protein 2 [Cinnamomum micranthum f. kanehirae]
Phoebe_bournei_newGene_10485	[U]	Intracellular trafficking, secretion, and vesicular transport	Molecular Function: protein serine/threonine kinase activity (GO:0004674);; Molecular Function: ATP binding (GO:0005524);;	K20714|1.1e-120|egu:105051411|K20714 serine/threonine-protein kinase OXI1 [EC:2.7.11.1] | (RefSeq) serine/threonine-protein kinase OXI1-like	[R]	General function prediction only	Protein kinase domain	Serine/threonine-protein kinase OXI1 OS=Arabidopsis thaliana OX=3702 GN=OXI1 PE=1 SV=1	Serine/threonine-protein kinase OXI1-like protein OS=Cinnamomum micranthum f. kanehirae OX=337451 GN=CKAN_00021000 PE=4 SV=1	T	Signal transduction mechanisms	serine/threonine-protein kinase OXI1-like protein [Cinnamomum micranthum f. kanehirae]
Phoebe_bournei_newGene_7733	--	--	Molecular Function: ATP binding (GO:0005524);;	K11269|1.3e-85|nnu:104585833|K11269 chromosome transmission fidelity protein 18 | (RefSeq) chromosome transmission fidelity protein 18 homolog	[DL]	--	--	--	Chromosome transmission fidelity protein 18 OS=Cinnamomum micranthum f. kanehirae OX=337451 GN=CKAN_00740600 PE=4 SV=1	O	Posttranslational modification, protein turnover, chaperones	chromosome transmission fidelity protein 18 [Cinnamomum micranthum f. kanehirae]
Phoebe_bournei_newGene_9281	--	--	Cellular Component: nuclear chromosome (GO:0000228);; Cellular Component: chromatin (GO:0000785);; Cellular Component: nuclear chromatin (GO:0000790);; Biological Process: sister chromatid segregation (GO:0000819);; Molecular Function: molecular_function (GO:0003674);; Molecular Function: chromatin binding (GO:0003682);; Molecular Function: binding (GO:0005488);; Cellular Component: cellular_comp…	--	[S]	Function unknown	Mini-chromosome maintenance replisome factor	Mini-chromosome maintenance complex-binding protein OS=Arabidopsis thaliana OX=3702 GN=ETG1 PE=1 SV=1	Mini-chromosome maintenance complex-binding-like protein isoform X1 OS=Cinnamomum micranthum f. kanehirae OX=337451 GN=CKAN_02138900 PE=4 SV=1	S	Function unknown	mini-chromosome maintenance complex-binding-like protein isoform X1 [Cinnamomum micranthum f. kanehirae]
Phoebe_bournei_newGene_9698	--	--	Molecular Function: nucleic acid binding (GO:0003676);; Biological Process: DNA integration (GO:0015074);;	K17545|4.0e-109|zma:103634684|K17545 serine/threonine-protein kinase ULK4 [EC:2.7.11.1] | (RefSeq) uncharacterized protein LOC103634684	[R]	General function prediction only	Reverse transcriptase (RNA-dependent DNA polymerase)	Retrovirus-related Pol polyprotein from transposon RE2 OS=Arabidopsis thaliana OX=3702 GN=RE2 PE=4 SV=1	Integrase catalytic domain-containing protein OS=Fagus sylvatica OX=28930 GN=FSB_LOCUS28301 PE=4 SV=1	L	Replication, recombination and repair	uncharacterized protein LOC114307591 [Camellia sinensis]
Phoebe_bournei_newGene_6172	[QV]	--	Molecular Function: monooxygenase activity (GO:0004497);; Molecular Function: iron ion binding (GO:0005506);; Cellular Component: integral component of membrane (GO:0016021);; Molecular Function: oxidoreductase activity, acting on paired donors, with incorporation or reduction of molecular oxygen (GO:0016705);; Molecular Function: heme binding (GO:0020037);;	K09588|4.8e-205|hbr:110646453|K09588 cytochrome P450 family 90 subfamily A polypeptide 1 [EC:1.14.-.-] | (RefSeq) cytochrome P450 90A1-like	[QI]	--	Cytochrome P450	Cytochrome P450 90A1 OS=Arabidopsis thaliana OX=3702 GN=CYP90A1 PE=1 SV=1	Cytochrome P450 90A1-like protein OS=Cinnamomum micranthum f. kanehirae OX=337451 GN=CKAN_00000100 PE=3 SV=1	Q	Secondary metabolites biosynthesis, transport and catabolism	cytochrome P450 90A1-like protein [Cinnamomum micranthum f. kanehirae]
Phoebe_bournei_newGene_3962	--	--	Cellular Component: mediator complex (GO:0016592);;	--	--	--	--	Mediator of RNA polymerase II transcription subunit 8 OS=Arabidopsis thaliana OX=3702 GN=MED8 PE=1 SV=1	Mediator of RNA polymerase II transcription subunit 8 OS=Cinnamomum micranthum f. kanehirae OX=337451 GN=CKAN_00284500 PE=4 SV=1	S	Function unknown	mediator of RNA polymerase II transcription subunit 8 [Cinnamomum micranthum f. kanehirae]
Phoebe_bournei_newGene_1977	--	--	Molecular Function: calcium ion binding (GO:0005509);; Molecular Function: calcium-dependent phospholipid binding (GO:0005544);;	K17098|1.7e-76|qsu:111992290|K17098 annexin D | (RefSeq) annexin D5	[U]	Intracellular trafficking, secretion, and vesicular transport	Annexin	--	Annexin OS=Cinnamomum micranthum f. kanehirae OX=337451 GN=CKAN_00347900 PE=3 SV=1	U	Intracellular trafficking, secretion, and vesicular transport	annexin D5-like protein [Cinnamomum micranthum f. kanehirae]
Phoebe_bournei_newGene_3477	--	--	--	--	--	--	Inositol hexakisphosphate	--	Paladin isoform X2 OS=Cinnamomum micranthum f. kanehirae OX=337451 GN=CKAN_02375200 PE=4 SV=1	S	Function unknown	paladin isoform X2 [Cinnamomum micranthum f. kanehirae]
Phoebe_bournei_newGene_8572	--	--	Molecular Function: protein kinase activity (GO:0004672);; Molecular Function: ATP binding (GO:0005524);;	--	--	--	--	--	Putative LRR receptor-like serine/threonine-protein kinase RKF3 OS=Cinnamomum micranthum f. kanehirae OX=337451 GN=CKAN_00170300 PE=4 SV=1	--	--	putative LRR receptor-like serine/threonine-protein kinase RKF3 [Cinnamomum micranthum f. kanehirae]
Phoebe_bournei_newGene_4834	--	--	Molecular Function: ADP binding (GO:0043531);;	--	--	--	--	--	Putative disease resistance protein OS=Cinnamomum micranthum f. kanehirae OX=337451 GN=CKAN_00021700 PE=4 SV=1	--	--	putative disease resistance protein [Cinnamomum micranthum f. kanehirae]
Phoebe_bournei_newGene_4781	[J]	Translation, ribosomal structure and biogenesis	Molecular Function: RNA binding (GO:0003723);;	K14411|4.3e-182|egu:105056201|K14411 RNA-binding protein Musashi | (RefSeq) heterogeneous nuclear ribonucleoprotein 1	[A]	RNA processing and modification	RNA recognition motif. (a.k.a. RRM, RBD, or RNP domain)	Heterogeneous nuclear ribonucleoprotein 1 OS=Arabidopsis thaliana OX=3702 GN=RNP1 PE=1 SV=1	Heterogeneous nuclear ribonucleoprotein 1-like protein isoform X1 OS=Cinnamomum micranthum f. kanehirae OX=337451 GN=CKAN_02537200 PE=4 SV=1	A	RNA processing and modification	heterogeneous nuclear ribonucleoprotein 1-like protein isoform X1 [Cinnamomum micranthum f. kanehirae]
Phoebe_bournei_newGene_2114	--	--	Cellular Component: integral component of membrane (GO:0016021);;	--	--	--	Protein of unknown function (DUF1218)	--	Uncharacterized protein OS=Cinnamomum micranthum f. kanehirae OX=337451 GN=CKAN_01620500 PE=4 SV=1	S	Function unknown	hypothetical protein CKAN_01620500 [Cinnamomum micranthum f. kanehirae]
Phoebe_bournei_newGene_10689	--	--	--	K13963|2.4e-49|vra:111242705|K13963 serpin B | (RefSeq) uncharacterized protein LOC111242705	--	--	--	--	Endo/exonuclease/phosphatase domain-containing protein OS=Cinnamomum micranthum f. kanehirae OX=337451 GN=CKAN_02468800 PE=4 SV=1	S	Function unknown	hypothetical protein CKAN_02468800 [Cinnamomum micranthum f. kanehirae]
Phoebe_bournei_newGene_5606	--	--	Cellular Component: lytic vacuole (GO:0000323);; Cellular Component: cellular_component (GO:0005575);; Cellular Component: intracellular (GO:0005622);; Cellular Component: obsolete cell (GO:0005623);; Cellular Component: cytoplasm (GO:0005737);; Cellular Component: lysosome (GO:0005764);; Cellular Component: lysosomal membrane (GO:0005765);; Cellular Component: endosome (GO:0005768);; Cellular Co…	K14011|2.6e-122|nnu:104607377|K14011 UBX domain-containing protein 6 | (RefSeq) plant UBX domain-containing protein 2	[O]	Posttranslational modification, protein turnover, chaperones	PUB domain	Plant UBX domain-containing protein 2 OS=Arabidopsis thaliana OX=3702 GN=PUX2 PE=1 SV=2	Plant UBX domain-containing protein 2 OS=Cinnamomum micranthum f. kanehirae OX=337451 GN=CKAN_00339800 PE=4 SV=1	O	Posttranslational modification, protein turnover, chaperones	plant UBX domain-containing protein 2 [Cinnamomum micranthum f. kanehirae]
Phoebe_bournei_newGene_3169	--	--	--	--	--	--	--	--	Transcription factor SCREAM2-like protein isoform X1 OS=Cinnamomum micranthum f. kanehirae OX=337451 GN=CKAN_00991900 PE=4 SV=1	S	Function unknown	transcription factor SCREAM2-like protein isoform X1 [Cinnamomum micranthum f. kanehirae]
Phoebe_bournei_newGene_4211	--	--	Molecular Function: RNA binding (GO:0003723);; Cellular Component: integral component of membrane (GO:0016021);;	K21444|2.9e-237|nnu:104610791|K21444 poly(rC)-binding protein 3/4 | (RefSeq) KH domain-containing protein At4g18375	[AR]	--	KH domain	KH domain-containing protein At4g18375 OS=Arabidopsis thaliana OX=3702 GN=At4g18375 PE=2 SV=1	Uncharacterized protein OS=Cinnamomum micranthum f. kanehirae OX=337451 GN=CKAN_01051000 PE=4 SV=1	A	RNA processing and modification	hypothetical protein CKAN_01051000 [Cinnamomum micranthum f. kanehirae]
Phoebe_bournei_newGene_6552	--	--	Molecular Function: structural constituent of ribosome (GO:0003735);; Biological Process: translation (GO:0006412);; Cellular Component: cytosolic large ribosomal subunit (GO:0022625);;	K02924|2.2e-23|atr:105420742|K02924 large subunit ribosomal protein L39e | (RefSeq) 60S ribosomal protein L39-3	[J]	Translation, ribosomal structure and biogenesis	Ribosomal L39 protein	60S ribosomal protein L39-1 OS=Arabidopsis thaliana OX=3702 GN=RPL39A PE=3 SV=2	Putative ribosomal protein L39e OS=Helianthus annuus OX=4232 GN=HannXRQ_Chr05g0141501 PE=3 SV=1	J	Translation, ribosomal structure and biogenesis	unnamed protein product, partial [Vitis vinifera]
Phoebe_bournei_newGene_438	[O]	Posttranslational modification, protein turnover, chaperones	Molecular Function: molecular_function (GO:0003674);; Molecular Function: catalytic activity (GO:0003824);; Cellular Component: cellular_component (GO:0005575);; Cellular Component: intracellular (GO:0005622);; Cellular Component: obsolete cell (GO:0005623);; Cellular Component: cytoplasm (GO:0005737);; Biological Process: biological_process (GO:0008150);; Biological Process: metabolic process (G…	--	[O]	Posttranslational modification, protein turnover, chaperones	Thioredoxin	Thioredoxin-like 1-2, chloroplastic OS=Oryza sativa subsp. japonica OX=39947 GN=Os03g0326500 PE=2 SV=1	Thioredoxin-like protein 1-2, chloroplastic OS=Cinnamomum micranthum f. kanehirae OX=337451 GN=CKAN_00329000 PE=4 SV=1	O	Posttranslational modification, protein turnover, chaperones	thioredoxin-like protein 1-2, chloroplastic [Cinnamomum micranthum f. kanehirae]
Phoebe_bournei_newGene_9553	--	--	Cellular Component: nucleus (GO:0005634);; Biological Process: DNA repair (GO:0006281);; Biological Process: DNA recombination (GO:0006310);; Cellular Component: Smc5-Smc6 complex (GO:0030915);;	K22825|4.4e-41|aof:109843571|K22825 non-structural maintenance of chromosomes element 4 | (RefSeq) non-structural maintenance of chromosomes element 4 homolog A-like	[S]	Function unknown	--	Non-structural maintenance of chromosomes element 4 homolog A OS=Arabidopsis thaliana OX=3702 GN=NSE4A PE=2 SV=1	Non-structural maintenance of chromosomes element 4 OS=Cinnamomum micranthum f. kanehirae OX=337451 GN=CKAN_00634100 PE=3 SV=1	S	Function unknown	non-structural maintenance of chromosomes element 4 A [Cinnamomum micranthum f. kanehirae]
Phoebe_bournei_newGene_7706	--	--	Molecular Function: hydrolase activity, acting on ester bonds (GO:0016788);;	--	--	--	--	GDSL esterase/lipase At5g45910 OS=Arabidopsis thaliana OX=3702 GN=At5g45910 PE=2 SV=1	GDSL esterase/lipase OS=Cinnamomum micranthum f. kanehirae OX=337451 GN=CKAN_02574500 PE=3 SV=1	S	Function unknown	GDSL esterase/lipase [Cinnamomum micranthum f. kanehirae]
Phoebe_bournei_newGene_8075	--	--	Molecular Function: protein serine/threonine kinase activity (GO:0004674);; Molecular Function: ATP binding (GO:0005524);; Cellular Component: integral component of membrane (GO:0016021);; Molecular Function: carbohydrate binding (GO:0030246);; Biological Process: recognition of pollen (GO:0048544);;	K13420|4.7e-10|mesc:110601988|K13420 LRR receptor-like serine/threonine-protein kinase FLS2 [EC:2.7.11.1] | (RefSeq) LRR receptor-like serine/threonine-protein kinase FLS2	--	--	S-locus glycoprotein domain	G-type lectin S-receptor-like serine/threonine-protein kinase At4g27290 OS=Arabidopsis thaliana OX=3702 GN=At4g27290 PE=3 SV=4	Receptor-like serine/threonine-protein kinase OS=Cinnamomum micranthum f. kanehirae OX=337451 GN=CKAN_01716200 PE=3 SV=1	T	Signal transduction mechanisms	G-type lectin S-receptor-like serine/threonine-protein kinase [Cinnamomum micranthum f. kanehirae]
Phoebe_bournei_newGene_11193	--	--	Molecular Function: peptidyl-prolyl cis-trans isomerase activity (GO:0003755);;	K09578|2.1e-29|nnu:104607479|K09578 peptidyl-prolyl cis-trans isomerase NIMA-interacting 1 [EC:5.2.1.8] | (RefSeq) peptidyl-prolyl cis-trans isomerase Pin1	[O]	Posttranslational modification, protein turnover, chaperones	PPIC-type PPIASE domain	Peptidyl-prolyl cis-trans isomerase Pin1 OS=Malus domestica OX=3750 GN=PIN1 PE=2 SV=1	Peptidyl-prolyl cis-trans isomerase OS=Nelumbo nucifera OX=4432 GN=LOC104607479 PE=4 SV=1	O	Posttranslational modification, protein turnover, chaperones	PREDICTED: peptidyl-prolyl cis-trans isomerase Pin1 [Nelumbo nucifera]
Phoebe_bournei_newGene_3496	[M]	Cell wall/membrane/envelope biogenesis	Cellular Component: integral component of membrane (GO:0016021);; Molecular Function: membrane insertase activity (GO:0032977);;	K03217|6.0e-112|nnu:104600369|K03217 YidC/Oxa1 family membrane protein insertase | (RefSeq) mitochondrial inner membrane protein OXA1-like	[OU]	--	60Kd inner membrane protein	Mitochondrial inner membrane protein OXA1 OS=Arabidopsis thaliana OX=3702 GN=OXA1 PE=2 SV=2	Mitochondrial inner membrane protein OXA1-like protein OS=Cinnamomum micranthum f. kanehirae OX=337451 GN=CKAN_00890200 PE=3 SV=1	--	--	mitochondrial inner membrane protein OXA1-like protein [Cinnamomum micranthum f. kanehirae]
Phoebe_bournei_newGene_13097	--	--	Cellular Component: nucleosome (GO:0000786);; Molecular Function: DNA binding (GO:0003677);; Cellular Component: nucleus (GO:0005634);; Molecular Function: protein heterodimerization activity (GO:0046982);;	K11253|1.3e-19|jcu:105642871|K11253 histone H3 | (RefSeq) histone H3-like centromeric protein HTR12 isoform X1	[B]	Chromatin structure and dynamics	Core histone H2A/H2B/H3/H4	Histone H3-like centromeric protein HTR12 OS=Arabidopsis thaliana OX=3702 GN=HTR12 PE=1 SV=3	Histone H3.2 OS=Jatropha curcas OX=180498 GN=JCGZ_14279 PE=3 SV=1	B	Chromatin structure and dynamics	histone H3-like centromeric protein HTR12 isoform X1 [Jatropha curcas]
Phoebe_bournei_newGene_5341	--	--	--	--	--	--	--	--	PMD domain-containing protein OS=Cinnamomum micranthum f. kanehirae OX=337451 GN=CKAN_00173800 PE=4 SV=1	--	--	hypothetical protein CKAN_00173800 [Cinnamomum micranthum f. kanehirae]
Phoebe_bournei_newGene_11841	[T]	Signal transduction mechanisms	Molecular Function: protein serine/threonine kinase activity (GO:0004674);; Molecular Function: ATP binding (GO:0005524);;	K01183|8.7e-55|nsy:104241083|K01183 chitinase [EC:3.2.1.14] | (RefSeq) chitinase-3-like protein 2	--	--	Protein kinase domain	Receptor-like serine/threonine-protein kinase SD1-7 OS=Arabidopsis thaliana OX=3702 GN=SD17 PE=1 SV=1	Receptor-like serine/threonine-protein kinase SD1-8 OS=Cinnamomum micranthum f. kanehirae OX=337451 GN=CKAN_01714800 PE=3 SV=1	T	Signal transduction mechanisms	receptor-like serine/threonine-protein kinase SD1-8 [Cinnamomum micranthum f. kanehirae]
Phoebe_bournei_newGene_11370	--	--	Cellular Component: integral component of membrane (GO:0016021);;	--	--	--	CorA-like Mg2+ transporter protein	--	Mg2+ transporter protein OS=Cinnamomum micranthum f. kanehirae OX=337451 GN=CKAN_00239200 PE=4 SV=1	P	Inorganic ion transport and metabolism	Mg2+ transporter protein [Cinnamomum micranthum f. kanehirae]
Phoebe_bournei_newGene_8849	--	--	Molecular Function: ADP binding (GO:0043531);;	K13459|7.4e-16|hbr:110635607|K13459 disease resistance protein RPS2 | (RefSeq) disease resistance protein At4g27190-like	--	--	--	--	Putative disease resistance protein isoform X1 OS=Cinnamomum micranthum f. kanehirae OX=337451 GN=CKAN_01705200 PE=4 SV=1	T	Signal transduction mechanisms	putative disease resistance protein isoform X1 [Cinnamomum micranthum f. kanehirae]
Phoebe_bournei_newGene_7312	--	--	Molecular Function: peroxidase activity (GO:0004601);; Cellular Component: extracellular region (GO:0005576);; Biological Process: response to oxidative stress (GO:0006979);; Molecular Function: heme binding (GO:0020037);; Biological Process: hydrogen peroxide catabolic process (GO:0042744);; Molecular Function: metal ion binding (GO:0046872);;	K00430|3.4e-18|atr:18445637|K00430 peroxidase [EC:1.11.1.7] | (RefSeq) peroxidase 57	--	--	Peroxidase	Probable peroxidase 61 OS=Arabidopsis thaliana OX=3702 GN=PER61 PE=3 SV=1	Peroxidase OS=Cinnamomum micranthum f. kanehirae OX=337451 GN=CKAN_01742600 PE=3 SV=1	Q	Secondary metabolites biosynthesis, transport and catabolism	peroxidase 57-like protein [Cinnamomum micranthum f. kanehirae]
Phoebe_bournei_newGene_12754	[R]	General function prediction only	Biological Process: lipid catabolic process (GO:0016042);; Molecular Function: hydrolase activity (GO:0016787);;	--	[I]	Lipid transport and metabolism	--	Patatin-like protein 2 OS=Arabidopsis thaliana OX=3702 GN=PLP2 PE=1 SV=1	Patatin OS=Cinnamomum micranthum f. kanehirae OX=337451 GN=CKAN_01292900 PE=3 SV=1	I	Lipid transport and metabolism	patatin-like protein 2 [Cinnamomum micranthum f. kanehirae]
Phoebe_bournei_newGene_7931	--	--	--	--	--	--	--	--	Uncharacterized protein OS=Malus domestica OX=3750 GN=DVH24_031521 PE=4 SV=1	--	--	hypothetical protein DVH24_031521 [Malus domestica]
Phoebe_bournei_newGene_11600	--	--	Molecular Function: protein binding (GO:0005515);; Cellular Component: integral component of membrane (GO:0016021);;	--	--	--	Leucine rich repeat	--	Uncharacterized protein (Fragment) OS=Eragrostis curvula OX=38414 GN=EJB05_30484 PE=4 SV=1	V	Defense mechanisms	hypothetical protein EJB05_30484, partial [Eragrostis curvula]
Phoebe_bournei_newGene_5665	--	--	Molecular Function: protein kinase activity (GO:0004672);; Molecular Function: ATP binding (GO:0005524);; Molecular Function: carbohydrate binding (GO:0030246);;	K00924|1.5e-19|eus:EUTSA_v10025265mg|K00924 kinase [EC:2.7.1.-] | (RefSeq) hypothetical protein	[T]	Signal transduction mechanisms	--	Receptor-like cytoplasmic kinase 176 OS=Oryza sativa subsp. japonica OX=39947 GN=RLCK176 PE=1 SV=1	Concanavalin A-like protein lectin/glucanase, subgroup OS=Cinnamomum micranthum f. kanehirae OX=337451 GN=CKAN_00705400 PE=4 SV=1	T	Signal transduction mechanisms	Concanavalin A-like protein lectin/glucanase, subgroup [Cinnamomum micranthum f. kanehirae]
Phoebe_bournei_newGene_4039	--	--	Cellular Component: integral component of membrane (GO:0016021);;	K13148|5.2e-25|mesc:110605667|K13148 integrator complex subunit 11 [EC:3.1.27.-] | (RefSeq) cleavage and polyadenylation specificity factor subunit 3-II	[O]	Posttranslational modification, protein turnover, chaperones	Ring finger domain	RING-H2 finger protein ATL70 OS=Arabidopsis thaliana OX=3702 GN=ATL70 PE=2 SV=1	Zinc finger protein OS=Cinnamomum micranthum f. kanehirae OX=337451 GN=CKAN_01214800 PE=4 SV=1	O	Posttranslational modification, protein turnover, chaperones	zinc finger protein [Cinnamomum micranthum f. kanehirae]
Phoebe_bournei_newGene_9316	[HT]	--	Cellular Component: integral component of membrane (GO:0016021);; Molecular Function: kinase activity (GO:0016301);;	K08869|2.3e-284|nnu:104612249|K08869 aarF domain-containing kinase | (RefSeq) probable serine/threonine-protein kinase abkC	[R]	General function prediction only	ABC1 family	Putative ABC1 protein At2g40090 OS=Arabidopsis thaliana OX=3702 GN=At2g40090 PE=2 SV=2	Putative serine/threonine-protein kinase abkC isoform X1 OS=Cinnamomum micranthum f. kanehirae OX=337451 GN=CKAN_01322800 PE=4 SV=1	K	Transcription	putative serine/threonine-protein kinase abkC isoform X1 [Cinnamomum micranthum f. kanehirae]
Phoebe_bournei_newGene_611	--	--	Cellular Component: cellular_component (GO:0005575);; Cellular Component: obsolete cell (GO:0005623);; Cellular Component: plasma membrane (GO:0005886);; Biological Process: cellular protein modification process (GO:0006464);; Biological Process: nitrogen compound metabolic process (GO:0006807);; Biological Process: biological_process (GO:0008150);; Biological Process: metabolic process (GO:00081…	--	--	--	NPH3 family	Root phototropism protein 3 OS=Arabidopsis thaliana OX=3702 GN=RPT3 PE=1 SV=2	Root phototropism protein 3 isoform X1 OS=Cinnamomum micranthum f. kanehirae OX=337451 GN=CKAN_01905300 PE=3 SV=1	S	Function unknown	root phototropism protein 3 isoform X1 [Cinnamomum micranthum f. kanehirae]
Phoebe_bournei_newGene_5927	--	--	--	--	--	--	Myb/SANT-like DNA-binding domain	--	Myb/SANT-like domain-containing protein OS=Cinnamomum micranthum f. kanehirae OX=337451 GN=CKAN_02120900 PE=4 SV=1	S	Function unknown	Myb/SANT-like domain-containing protein [Cinnamomum micranthum f. kanehirae]
Phoebe_bournei_newGene_12308	--	--	Molecular Function: protein serine/threonine kinase activity (GO:0004674);; Molecular Function: ATP binding (GO:0005524);; Molecular Function: carbohydrate binding (GO:0030246);; Biological Process: recognition of pollen (GO:0048544);;	K01183|2.0e-14|nsy:104241083|K01183 chitinase [EC:3.2.1.14] | (RefSeq) chitinase-3-like protein 2	--	--	Protein tyrosine and serine/threonine kinase	G-type lectin S-receptor-like serine/threonine-protein kinase SRK OS=Arabidopsis thaliana OX=3702 GN=SRK PE=2 SV=1	Receptor-like serine/threonine-protein kinase OS=Cinnamomum micranthum f. kanehirae OX=337451 GN=CKAN_01717200 PE=3 SV=1	--	--	G-type lectin S-receptor-like serine/threonine-protein kinase RKS1 [Cinnamomum micranthum f. kanehirae]
Phoebe_bournei_newGene_2743	--	--	Molecular Function: RNA binding (GO:0003723);; Cellular Component: nucleus (GO:0005634);; Cellular Component: cytoplasm (GO:0005737);; Biological Process: mRNA processing (GO:0006397);;	K12839|3.0e-30|atr:18427792|K12839 survival of motor neuron-related-splicing factor 30 | (RefSeq) survival of motor neuron-related-splicing factor 30 isoform X2	[A]	RNA processing and modification	Survival motor neuron protein (SMN)	--	Tudor domain-containing protein OS=Cinnamomum micranthum f. kanehirae OX=337451 GN=CKAN_00720900 PE=4 SV=1	A	RNA processing and modification	Tudor domain-containing protein [Cinnamomum micranthum f. kanehirae]
Phoebe_bournei_newGene_6336	--	--	--	--	--	--	--	--	Uncharacterized protein OS=Vitis vinifera OX=29760 GN=VITISV_003315 PE=4 SV=1	S	Function unknown	uncharacterized protein LOC114319530 [Camellia sinensis]
Phoebe_bournei_newGene_4988	[G]	Carbohydrate transport and metabolism	Cellular Component: integral component of membrane (GO:0016021);; Molecular Function: transmembrane transporter activity (GO:0022857);;	K08150|3.5e-34|nau:109218122|K08150 MFS transporter, SP family, solute carrier family 2 (myo-inositol transporter), member 13 | (RefSeq) inositol transporter 1	[R]	General function prediction only	Sugar (and other) transporter	Polyol transporter 5 OS=Arabidopsis thaliana OX=3702 GN=PLT5 PE=1 SV=2	Polyol transporter 5-like protein OS=Cinnamomum micranthum f. kanehirae OX=337451 GN=CKAN_02628100 PE=3 SV=1	U	Intracellular trafficking, secretion, and vesicular transport	polyol transporter 5-like protein [Cinnamomum micranthum f. kanehirae]
Phoebe_bournei_newGene_11719	--	--	Molecular Function: zinc ion binding (GO:0008270);;	K05849|1.0e-109|ini:109158657|K05849 solute carrier family 8 (sodium/calcium exchanger) | (RefSeq) pentatricopeptide repeat-containing protein At3g62890-like	[R]	General function prediction only	DYW family of nucleic acid deaminases	Pentatricopeptide repeat-containing protein At1g08070, chloroplastic OS=Arabidopsis thaliana OX=3702 GN=PCMP-H12 PE=2 SV=1	Pentatricopeptide repeat-containing-like protein OS=Cinnamomum micranthum f. kanehirae OX=337451 GN=CKAN_02759500 PE=4 SV=1	S	Function unknown	pentatricopeptide repeat-containing-like protein [Cinnamomum micranthum f. kanehirae]
Phoebe_bournei_newGene_11273	--	--	Molecular Function: DNA binding (GO:0003677);; Cellular Component: nucleus (GO:0005634);; Biological Process: regulation of transcription, DNA-templated (GO:0006355);;	K00521|3.3e-35|cmos:111447866|K00521 ferric-chelate reductase [EC:1.16.1.7] | (RefSeq) ferric reduction oxidase 7, chloroplastic-like	--	--	No apical meristem (NAM) protein	Putative NAC domain-containing protein 61 OS=Arabidopsis thaliana OX=3702 GN=NAC061 PE=3 SV=1	NAC domain-containing protein 90-like protein OS=Cinnamomum micranthum f. kanehirae OX=337451 GN=CKAN_01102200 PE=4 SV=1	K	Transcription	NAC domain-containing protein 90-like protein [Cinnamomum micranthum f. kanehirae]
Phoebe_bournei_newGene_4525	[Q]	Secondary metabolites biosynthesis, transport and catabolism	--	--	--	--	Glyoxalase/Bleomycin resistance protein/Dioxygenase superfamily	--	VOC domain-containing protein OS=Aquilegia coerulea OX=218851 GN=AQUCO_00600128v1 PE=4 SV=1	S	Function unknown	Metallothiol transferase fosb, partial [Thalictrum thalictroides]
Phoebe_bournei_newGene_4194	[P]	Inorganic ion transport and metabolism	Molecular Function: peroxidase activity (GO:0004601);; Biological Process: response to oxidative stress (GO:0006979);; Molecular Function: heme binding (GO:0020037);;	K00434|1.1e-128|egr:104432832|K00434 L-ascorbate peroxidase [EC:1.11.1.11] | (RefSeq) L-ascorbate peroxidase, cytosolic isoform X1	--	--	Peroxidase	L-ascorbate peroxidase, cytosolic OS=Pisum sativum OX=3888 GN=APX1 PE=1 SV=2	L-ascorbate peroxidase OS=Ananas comosus OX=4615 GN=ACMD2_01475 PE=3 SV=1	E	Amino acid transport and metabolism	L-ascorbate peroxidase, cytosolic [Ananas comosus]
Phoebe_bournei_newGene_572	--	--	--	--	--	--	--	--	Titin OS=Cinnamomum micranthum f. kanehirae OX=337451 GN=CKAN_02430300 PE=3 SV=1	--	--	titin [Cinnamomum micranthum f. kanehirae]
Phoebe_bournei_newGene_3979	--	--	Cellular Component: integral component of membrane (GO:0016021);;	--	--	--	--	--	Putative leucine-rich repeat-containing protein OS=Cinnamomum micranthum f. kanehirae OX=337451 GN=CKAN_00556800 PE=4 SV=1	--	--	putative leucine-rich repeat-containing protein [Cinnamomum micranthum f. kanehirae]
Phoebe_bournei_newGene_11094	[M]	Cell wall/membrane/envelope biogenesis	Molecular Function: protein serine/threonine kinase activity (GO:0004674);; Molecular Function: ATP binding (GO:0005524);;	K08832|1.6e-191|mus:103984588|K08832 serine/threonine-protein kinase SRPK3 [EC:2.7.11.1] | (RefSeq) SRSF protein kinase 3-like	[T]	Signal transduction mechanisms	Protein kinase domain	Serine/threonine-protein kinase AFC3 OS=Arabidopsis thaliana OX=3702 GN=AFC3 PE=1 SV=2	SRSF protein kinase 1-like protein OS=Cinnamomum micranthum f. kanehirae OX=337451 GN=CKAN_01339200 PE=3 SV=1	T	Signal transduction mechanisms	SRSF protein kinase 1-like protein [Cinnamomum micranthum f. kanehirae]
Phoebe_bournei_newGene_11662	--	--	Molecular Function: DNA-binding transcription factor activity (GO:0003700);; Cellular Component: nucleus (GO:0005634);; Molecular Function: sequence-specific DNA binding (GO:0043565);;	--	--	--	--	WRKY transcription factor 6 OS=Arabidopsis thaliana OX=3702 GN=WRKY6 PE=1 SV=1	Putative WRKY transcription factor 31 OS=Cinnamomum micranthum f. kanehirae OX=337451 GN=CKAN_01808900 PE=4 SV=1	K	Transcription	putative WRKY transcription factor 31 [Cinnamomum micranthum f. kanehirae]
Phoebe_bournei_newGene_2013	--	--	--	K12874|6.7e-10|qsu:112031791|K12874 intron-binding protein aquarius | (RefSeq) LOW QUALITY PROTEIN: intron-binding protein aquarius-like	[R]	General function prediction only	--	--	Pentatricopeptide repeat-containing protein isoform X1 OS=Cinnamomum micranthum f. kanehirae OX=337451 GN=CKAN_01549700 PE=4 SV=1	M	Cell wall/membrane/envelope biogenesis	pentatricopeptide repeat-containing protein isoform X1 [Cinnamomum micranthum f. kanehirae]
Phoebe_bournei_newGene_8329	--	--	Molecular Function: hydrolase activity, acting on ester bonds (GO:0016788);;	K01206|2.0e-40|eus:EUTSA_v10018726mg|K01206 alpha-L-fucosidase [EC:3.2.1.51] | (RefSeq) hypothetical protein	--	--	GDSL-like Lipase/Acylhydrolase	GDSL esterase/lipase At3g26430 OS=Arabidopsis thaliana OX=3702 GN=At3g26430 PE=2 SV=1	GDSL esterase/lipase-like protein OS=Cinnamomum micranthum f. kanehirae OX=337451 GN=CKAN_00269800 PE=3 SV=1	S	Function unknown	GDSL esterase/lipase-like protein [Cinnamomum micranthum f. kanehirae]
Phoebe_bournei_newGene_7838	--	--	Biological Process: fucose metabolic process (GO:0006004);; Cellular Component: integral component of membrane (GO:0016021);; Molecular Function: transferase activity, transferring glycosyl groups (GO:0016757);;	K23280|2.0e-77|egu:105057258|K23280 rhamnogalacturonan I rhamnosyltransferase [EC:2.4.1.351] | (RefSeq) uncharacterized protein At1g04910-like	--	--	GDP-fucose protein O-fucosyltransferase	O-fucosyltransferase 16 OS=Arabidopsis thaliana OX=3702 GN=OFUT16 PE=2 SV=1	O-fucosyltransferase family protein OS=Nelumbo nucifera OX=4432 GN=LOC104603730 PE=3 SV=1	G	Carbohydrate transport and metabolism	PREDICTED: uncharacterized protein At1g04910 [Nelumbo nucifera]
Phoebe_bournei_newGene_5708	--	--	--	--	--	--	--	--	Bcl-2-associated transcription factor 1-like protein OS=Cinnamomum micranthum f. kanehirae OX=337451 GN=CKAN_01569700 PE=4 SV=1	--	--	bcl-2-associated transcription factor 1-like protein [Cinnamomum micranthum f. kanehirae]
Phoebe_bournei_newGene_5806	[O]	Posttranslational modification, protein turnover, chaperones	Molecular Function: serine-type endopeptidase activity (GO:0004252);;	K15333|3.0e-84|nsy:104224633|K15333 tRNA guanosine-2'-O-methyltransferase [EC:2.1.1.34] | (RefSeq) uncharacterized protein LOC104224633	--	--	Subtilase family	Subtilisin-like protease 4 OS=Lotus japonicus OX=34305 GN=SBTM4 PE=2 SV=1	Subtilisin-like protein protease SBT1.7 OS=Cinnamomum micranthum f. kanehirae OX=337451 GN=CKAN_01837100 PE=3 SV=1	O	Posttranslational modification, protein turnover, chaperones	subtilisin-like protein protease SBT1.7 [Cinnamomum micranthum f. kanehirae]
Phoebe_bournei_newGene_1167	[G]	Carbohydrate transport and metabolism	Molecular Function: hydrolase activity, hydrolyzing O-glycosyl compounds (GO:0004553);; Biological Process: carbohydrate metabolic process (GO:0005975);; Cellular Component: integral component of membrane (GO:0016021);;	K01179|6.5e-23|mdm:103404387|K01179 endoglucanase [EC:3.2.1.4] | (RefSeq) endoglucanase 6	--	--	Glycosyl hydrolase family 9	Endoglucanase 15 OS=Oryza sativa subsp. japonica OX=39947 GN=Os05g0212300 PE=2 SV=1	Cellulase OS=Cinnamomum micranthum f. kanehirae OX=337451 GN=CKAN_02697100 PE=3 SV=1	G	Carbohydrate transport and metabolism	endoglucanase 19 [Cinnamomum micranthum f. kanehirae]
Phoebe_bournei_newGene_4007	[QV]	--	Molecular Function: monooxygenase activity (GO:0004497);; Molecular Function: iron ion binding (GO:0005506);; Molecular Function: oxidoreductase activity, acting on paired donors, with incorporation or reduction of molecular oxygen (GO:0016705);; Molecular Function: heme binding (GO:0020037);;	K24184|2.0e-169|egu:105054738|K24184 cytochrome P450 family 89 subfamily A [EC:1.14.-.-] | (RefSeq) cytochrome P450 89A2	[Q]	Secondary metabolites biosynthesis, transport and catabolism	Cytochrome P450	Cytochrome P450 89A2 OS=Arabidopsis thaliana OX=3702 GN=CYP89A2 PE=2 SV=2	Cytochrome P450 89A2 OS=Cinnamomum micranthum f. kanehirae OX=337451 GN=CKAN_01335300 PE=3 SV=1	Q	Secondary metabolites biosynthesis, transport and catabolism	cytochrome P450 89A2 [Cinnamomum micranthum f. kanehirae]
Phoebe_bournei_newGene_11234	--	--	Cellular Component: integral component of membrane (GO:0016021);; Molecular Function: transmembrane transporter activity (GO:0022857);;	K17500|4.0e-06|nto:104085001|K17500 integrin-linked kinase-associated serine/threonine phosphatase 2C [EC:3.1.3.16] | (RefSeq) WAT1-related protein At3g18200 isoform X1	--	--	EamA-like transporter family	WAT1-related protein At1g21890 OS=Arabidopsis thaliana OX=3702 GN=At1g21890 PE=2 SV=1	WAT1-related protein OS=Cinnamomum micranthum f. kanehirae OX=337451 GN=CKAN_00953300 PE=3 SV=1	S	Function unknown	WAT1-related protein isoform X1 [Cinnamomum micranthum f. kanehirae]
Phoebe_bournei_newGene_12611	--	--	Molecular Function: magnesium ion binding (GO:0000287);; Molecular Function: terpene synthase activity (GO:0010333);;	K15803|8.7e-40|cit:102614827|K15803 (-)-germacrene D synthase [EC:4.2.3.75] | (RefSeq) (-)-germacrene D synthase-like isoform X3	--	--	Terpene synthase family, metal binding domain	Beta-cubebene synthase OS=Magnolia grandiflora OX=3406 PE=1 SV=1	Terpene synthase 1 OS=Cinnamomum micranthum f. kanehirae OX=337451 GN=CKAN_02388600 PE=4 SV=1	S	Function unknown	terpene synthase 1 [Cinnamomum micranthum f. kanehirae]
Phoebe_bournei_newGene_184	--	--	--	K00940|3.8e-32|tcc:18606710|K00940 nucleoside-diphosphate kinase [EC:2.7.4.6] | (RefSeq) uncharacterized LOC18606710	--	--	--	--	Pleckstrin domain-containing protein OS=Cinnamomum micranthum f. kanehirae OX=337451 GN=CKAN_02252700 PE=4 SV=1	S	Function unknown	Pleckstrin domain-containing protein [Cinnamomum micranthum f. kanehirae]
Phoebe_bournei_newGene_9781	--	--	--	--	--	--	Domain of unknown function (DUF4216)	--	Uncharacterized protein OS=Fagus sylvatica OX=28930 GN=FSB_LOCUS24851 PE=4 SV=1	S	Function unknown	uncharacterized protein LOC114304269 [Camellia sinensis]
Phoebe_bournei_newGene_6841	[R]	General function prediction only	Molecular Function: chitinase activity (GO:0004568);; Biological Process: carbohydrate metabolic process (GO:0005975);; Biological Process: chitin catabolic process (GO:0006032);; Biological Process: cell wall macromolecule catabolic process (GO:0016998);;	K01183|5.9e-34|sita:101763988|K01183 chitinase [EC:3.2.1.14] | (RefSeq) endochitinase A	[R]	General function prediction only	Chitinase class I	Endochitinase 4 OS=Cryptomeria japonica OX=3369 PE=1 SV=1	Class IV chitinase Chia4-Pa1.1 OS=Cinnamomum micranthum f. kanehirae OX=337451 GN=CKAN_00299700 PE=4 SV=1	S	Function unknown	class IV chitinase Chia4-Pa1.1 [Cinnamomum micranthum f. kanehirae]
Phoebe_bournei_newGene_6428	--	--	Molecular Function: motor activity (GO:0003774);; Molecular Function: actin binding (GO:0003779);; Molecular Function: ATP binding (GO:0005524);; Biological Process: actin filament organization (GO:0007015);; Cellular Component: myosin complex (GO:0016459);;	K10357|0.0e+00|nnu:104587632|K10357 myosin V | (RefSeq) myosin-6-like	[Z]	Cytoskeleton	Myosin head (motor domain)	Myosin-8 OS=Arabidopsis thaliana OX=3702 GN=XI-B PE=3 SV=1	Myosin-6-like protein OS=Cinnamomum micranthum f. kanehirae OX=337451 GN=CKAN_02545600 PE=3 SV=1	Z	Cytoskeleton	myosin-6-like protein [Cinnamomum micranthum f. kanehirae]
Phoebe_bournei_newGene_5028	[I]	Lipid transport and metabolism	Molecular Function: hydrolase activity (GO:0016787);;	K20506|6.7e-94|egu:105060863|K20506 tuliposide A-converting enzyme [EC:4.2.99.22] | (RefSeq) tuliposide A-converting enzyme 2, chloroplastic-like	[V]	Defense mechanisms	alpha/beta hydrolase fold	Probable carboxylesterase 2 OS=Arabidopsis thaliana OX=3702 GN=CXE2 PE=2 SV=1	Putative carboxylesterase 2 OS=Cinnamomum micranthum f. kanehirae OX=337451 GN=CKAN_01912100 PE=4 SV=1	V	Defense mechanisms	putative carboxylesterase 2 [Cinnamomum micranthum f. kanehirae]
Phoebe_bournei_newGene_298	--	--	Cellular Component: integral component of membrane (GO:0016021);; Molecular Function: kinase activity (GO:0016301);;	K19041|1.2e-10|nta:107760680|K19041 E3 ubiquitin-protein ligase RNF38/44 [EC:2.3.2.27] | (RefSeq) RING-H2 finger protein ATL20-like	--	--	Wall-associated receptor kinase galacturonan-binding	--	Putative receptor-like protein kinase OS=Cinnamomum micranthum f. kanehirae OX=337451 GN=CKAN_02275600 PE=4 SV=1	T	Signal transduction mechanisms	putative receptor-like protein kinase [Cinnamomum micranthum f. kanehirae]
Phoebe_bournei_newGene_11989	--	--	--	K15341|2.5e-20|psom:113287781|K15341 DNA cross-link repair 1B protein [EC:3.1.-.-] | (RefSeq) 5' exonuclease Apollo-like	[L]	Replication, recombination and repair	--	--	DNA repair metallo-beta-lactamase OS=Macleaya cordata OX=56857 GN=BVC80_593g9 PE=4 SV=1	L	Replication, recombination and repair	DNA repair metallo-beta-lactamase [Macleaya cordata]
Phoebe_bournei_newGene_12224	--	--	Cellular Component: integral component of membrane (GO:0016021);;	--	--	--	--	--	Uncharacterized protein OS=Arundo donax OX=35708 PE=4 SV=1	--	--	--
Phoebe_bournei_newGene_11599	--	--	Cellular Component: integral component of membrane (GO:0016021);;	--	[R]	General function prediction only	Leucine rich repeat	Receptor-like protein 34 OS=Arabidopsis thaliana OX=3702 GN=RLP34 PE=2 SV=1	LRRNT_2 domain-containing protein OS=Sorghum bicolor OX=4558 GN=SORBI_3008G075700 PE=4 SV=1	S	Function unknown	hypothetical protein SORBI_3008G075700 [Sorghum bicolor]
Phoebe_bournei_newGene_3879	--	--	Molecular Function: nucleic acid binding (GO:0003676);; Molecular Function: RNA-DNA hybrid ribonuclease activity (GO:0004523);; Molecular Function: UDP-glycosyltransferase activity (GO:0008194);;	--	--	--	Reverse transcriptase-like	--	Putative UDP-rhamnose:rhamnosyltransferase 1 OS=Cinnamomum micranthum f. kanehirae OX=337451 GN=CKAN_01698200 PE=4 SV=1	--	--	putative UDP-rhamnose:rhamnosyltransferase 1 [Cinnamomum micranthum f. kanehirae]
Phoebe_bournei_newGene_13245	--	--	--	--	--	--	--	--	Paladin isoform X2 OS=Cinnamomum micranthum f. kanehirae OX=337451 GN=CKAN_02375200 PE=4 SV=1	S	Function unknown	paladin isoform X2 [Cinnamomum micranthum f. kanehirae]
Phoebe_bournei_newGene_8719	[IR]	--	Molecular Function: oxidoreductase activity, acting on CH-OH group of donors (GO:0016614);; Molecular Function: flavin adenine dinucleotide binding (GO:0050660);;	K00108|1.9e-224|egu:105043376|K00108 choline dehydrogenase [EC:1.1.99.1] | (RefSeq) protein HOTHEAD-like	[R]	General function prediction only	GMC oxidoreductase	Protein HOTHEAD OS=Arabidopsis thaliana OX=3702 GN=HTH PE=1 SV=1	Protein HOTHEAD-like protein OS=Cinnamomum micranthum f. kanehirae OX=337451 GN=CKAN_00937300 PE=3 SV=1	E	Amino acid transport and metabolism	protein HOTHEAD-like protein [Cinnamomum micranthum f. kanehirae]
Phoebe_bournei_newGene_11281	[HR]	--	Molecular Function: hydrolase activity (GO:0016787);;	K02952|4.7e-08|aip:107648613|K02952 small subunit ribosomal protein S13 | (RefSeq) 30S ribosomal protein S13, chloroplastic-like	--	--	Serine aminopeptidase, S33	--	Putative alpha/Beta hydrolase fold protein OS=Cinnamomum micranthum f. kanehirae OX=337451 GN=CKAN_01105400 PE=4 SV=1	S	Function unknown	putative alpha/Beta hydrolase fold protein [Cinnamomum micranthum f. kanehirae]
Phoebe_bournei_newGene_5389	[P]	Inorganic ion transport and metabolism	Cellular Component: integral component of plasma membrane (GO:0005887);; Molecular Function: ammonium transmembrane transporter activity (GO:0008519);;	K03320|3.1e-31|pxb:103927595|K03320 ammonium transporter, Amt family | (RefSeq) ammonium transporter 3 member 1-like	[P]	Inorganic ion transport and metabolism	Ammonium Transporter Family	Ammonium transporter 2 member 5 OS=Medicago truncatula OX=3880 GN=AMT2-5 PE=2 SV=1	Ammonium transporter OS=Cinnamomum micranthum f. kanehirae OX=337451 GN=CKAN_01976500 PE=4 SV=1	P	Inorganic ion transport and metabolism	Ammonium transporter [Cinnamomum micranthum f. kanehirae]
Phoebe_bournei_newGene_7581	--	--	Biological Process: cytoskeleton organization (GO:0007010);; Molecular Function: microtubule binding (GO:0008017);;	--	--	--	Microtubule-associated protein 70	--	--	--	--	--
Phoebe_bournei_newGene_5799	[O]	Posttranslational modification, protein turnover, chaperones	Molecular Function: serine-type endopeptidase activity (GO:0004252);;	K15333|2.0e-35|nsy:104224633|K15333 tRNA guanosine-2'-O-methyltransferase [EC:2.1.1.34] | (RefSeq) uncharacterized protein LOC104224633	--	--	Subtilase family	Subtilisin-like protease 4 OS=Lotus japonicus OX=34305 GN=SBTM4 PE=2 SV=1	Peptidase S8/S53 domain-containing protein OS=Cinnamomum micranthum f. kanehirae OX=337451 GN=CKAN_02741300 PE=3 SV=1	O	Posttranslational modification, protein turnover, chaperones	Peptidase S8/S53 domain-containing protein [Cinnamomum micranthum f. kanehirae]
Phoebe_bournei_newGene_10532	--	--	Molecular Function: DNA binding (GO:0003677);; Cellular Component: nucleus (GO:0005634);; Molecular Function: lipid binding (GO:0008289);;	K09338|0.0e+00|nnu:104604509|K09338 homeobox-leucine zipper protein | (RefSeq) homeobox-leucine zipper protein ATHB-15-like	--	--	START domain	Homeobox-leucine zipper protein ATHB-15 OS=Arabidopsis thaliana OX=3702 GN=ATHB-15 PE=1 SV=1	Homeobox-leucine zipper protein ATHB-15-like protein OS=Cinnamomum micranthum f. kanehirae OX=337451 GN=CKAN_00071800 PE=3 SV=1	K	Transcription	homeobox-leucine zipper protein ATHB-15-like protein [Cinnamomum micranthum f. kanehirae]
Phoebe_bournei_newGene_5728	[G]	Carbohydrate transport and metabolism	Molecular Function: hydrolase activity, hydrolyzing O-glycosyl compounds (GO:0004553);; Biological Process: carbohydrate metabolic process (GO:0005975);; Molecular Function: carbohydrate binding (GO:0030246);;	K05546|7.0e-100|ota:OT_ostta08g02820|K05546 mannosyl-oligosaccharide alpha-1,3-glucosidase [EC:3.2.1.207] | (RefSeq) Glycoside hydrolase, superfamily	[GMO]	--	Glycosyl hydrolases family 31	Probable glucan 1,3-alpha-glucosidase OS=Arabidopsis thaliana OX=3702 GN=PSL5 PE=1 SV=1	Glycoside hydrolase OS=Cinnamomum micranthum f. kanehirae OX=337451 GN=CKAN_01575600 PE=3 SV=1	G	Carbohydrate transport and metabolism	Glycoside hydrolase [Cinnamomum micranthum f. kanehirae]
Phoebe_bournei_newGene_6030	[F]	Nucleotide transport and metabolism	Molecular Function: nucleoside diphosphate kinase activity (GO:0004550);; Molecular Function: ATP binding (GO:0005524);; Biological Process: GTP biosynthetic process (GO:0006183);; Biological Process: UTP biosynthetic process (GO:0006228);; Biological Process: CTP biosynthetic process (GO:0006241);;	K00940|9.4e-98|nnu:104591622|K00940 nucleoside-diphosphate kinase [EC:2.7.4.6] | (RefSeq) nucleoside diphosphate kinase 2, chloroplastic	[F]	Nucleotide transport and metabolism	Nucleoside diphosphate kinase	Nucleoside diphosphate kinase 2, chloroplastic OS=Spinacia oleracea OX=3562 GN=NDPK2 PE=1 SV=1	Nucleoside diphosphate kinase OS=Cinnamomum micranthum f. kanehirae OX=337451 GN=CKAN_01254300 PE=3 SV=1	F	Nucleotide transport and metabolism	nucleoside diphosphate kinase 2, chloroplastic [Cinnamomum micranthum f. kanehirae]
Phoebe_bournei_newGene_3604	[T]	Signal transduction mechanisms	Molecular Function: protein kinase activity (GO:0004672);; Molecular Function: ATP binding (GO:0005524);;	K18669|4.0e-130|vcn:VOLCADRAFT_77582|K18669 dual specificity tyrosine-phosphorylation-regulated kinase 2/3/4 [EC:2.7.12.1] | (RefSeq) hypothetical protein	[R]	General function prediction only	Protein kinase domain	Dual specificity protein kinase YAK1 homolog OS=Arabidopsis thaliana OX=3702 GN=YAK1 PE=1 SV=1	Protein kinase domain-containing protein OS=Cinnamomum micranthum f. kanehirae OX=337451 GN=CKAN_00811300 PE=4 SV=1	T	Signal transduction mechanisms	Protein kinase domain-containing protein [Cinnamomum micranthum f. kanehirae]
Phoebe_bournei_newGene_2415	--	--	Molecular Function: ligand-gated ion channel activity (GO:0015276);; Cellular Component: integral component of membrane (GO:0016021);;	K05387|2.7e-11|qsu:112030676|K05387 glutamate receptor, ionotropic, plant | (RefSeq) glutamate receptor 2.3-like	[PET]	--	--	Glutamate receptor 2.5 OS=Arabidopsis thaliana OX=3702 GN=GLR2.5 PE=2 SV=2	Glutamate receptor 2.8-like protein isoform X2 OS=Cinnamomum micranthum f. kanehirae OX=337451 GN=CKAN_02051100 PE=4 SV=1	--	--	glutamate receptor 2.8-like protein isoform X2 [Cinnamomum micranthum f. kanehirae]
Phoebe_bournei_newGene_4423	--	--	Molecular Function: UDP-glycosyltransferase activity (GO:0008194);;	K23260|2.8e-45|fve:101306543|K23260 scopoletin glucosyltransferase [EC:2.4.1.128] | (RefSeq) UDP-glucose flavonoid 3-O-glucosyltransferase 7-like	[GC]	--	UDP-glucoronosyl and UDP-glucosyl transferase	UDP-glycosyltransferase 92A1 OS=Arabidopsis thaliana OX=3702 GN=UGT92A1 PE=2 SV=1	UDP-glycosyltransferase 92A1 OS=Cinnamomum micranthum f. kanehirae OX=337451 GN=CKAN_01804400 PE=3 SV=1	--	--	UDP-glycosyltransferase 92A1 [Cinnamomum micranthum f. kanehirae]
Phoebe_bournei_newGene_10856	--	--	Molecular Function: protein kinase activity (GO:0004672);; Molecular Function: ATP binding (GO:0005524);;	--	--	--	Transposase-associated domain	--	Transposase OS=Cinnamomum micranthum f. kanehirae OX=337451 GN=CKAN_01728100 PE=4 SV=1	--	--	transposase [Cinnamomum micranthum f. kanehirae]
Phoebe_bournei_newGene_9830	--	--	Molecular Function: DNA binding (GO:0003677);;	K09422|1.1e-20|pda:103712886|K09422 transcription factor MYB, plant | (RefSeq) transcription factor MYB62-like	--	--	--	--	Transcription factor MYB108-like protein OS=Cinnamomum micranthum f. kanehirae OX=337451 GN=CKAN_01420800 PE=4 SV=1	--	--	transcription factor MYB108-like protein [Cinnamomum micranthum f. kanehirae]
Phoebe_bournei_newGene_9275	--	--	Molecular Function: DNA binding (GO:0003677);; Cellular Component: nucleus (GO:0005634);; Biological Process: regulation of transcription, DNA-templated (GO:0006355);; Biological Process: auxin-activated signaling pathway (GO:0009734);;	K14486|1.3e-28|sita:101759755|K14486 auxin response factor | (RefSeq) LOW QUALITY PROTEIN: auxin response factor 2-like	--	--	B3 DNA binding domain	Auxin response factor 2 OS=Oryza sativa subsp. japonica OX=39947 GN=ARF2 PE=2 SV=1	Auxin response factor OS=Cinnamomum micranthum f. kanehirae OX=337451 GN=CKAN_02693300 PE=3 SV=1	K	Transcription	putative auxin response factor 3 [Cinnamomum micranthum f. kanehirae]
Phoebe_bournei_newGene_6073	[G]	Carbohydrate transport and metabolism	Molecular Function: zinc ion binding (GO:0008270);; Molecular Function: oxidoreductase activity (GO:0016491);;	K00083|6.3e-96|pda:103719587|K00083 cinnamyl-alcohol dehydrogenase [EC:1.1.1.195] | (RefSeq) probable cinnamyl alcohol dehydrogenase 6 isoform X1	[Q]	Secondary metabolites biosynthesis, transport and catabolism	Zinc-binding dehydrogenase	Probable cinnamyl alcohol dehydrogenase 6 OS=Oryza sativa subsp. japonica OX=39947 GN=CAD6 PE=2 SV=2	Putative cinnamyl alcohol dehydrogenase 6 OS=Cinnamomum micranthum f. kanehirae OX=337451 GN=CKAN_02156400 PE=3 SV=1	Q	Secondary metabolites biosynthesis, transport and catabolism	putative cinnamyl alcohol dehydrogenase 6 [Cinnamomum micranthum f. kanehirae]
Phoebe_bournei_newGene_11285	[O]	Posttranslational modification, protein turnover, chaperones	Molecular Function: iron ion binding (GO:0005506);; Biological Process: iron-sulfur cluster assembly (GO:0016226);; Molecular Function: iron-sulfur cluster binding (GO:0051536);;	K22074|5.8e-107|egu:105035701|K22074 NFU1 iron-sulfur cluster scaffold homolog, mitochondrial | (RefSeq) nifU-like protein 4, mitochondrial isoform X1	[O]	Posttranslational modification, protein turnover, chaperones	Scaffold protein Nfu/NifU N terminal	NifU-like protein 4, mitochondrial OS=Arabidopsis thaliana OX=3702 GN=NIFU4 PE=2 SV=1	NifU-like protein 4, mitochondrial isoform X1 OS=Cinnamomum micranthum f. kanehirae OX=337451 GN=CKAN_01106600 PE=3 SV=1	O	Posttranslational modification, protein turnover, chaperones	nifU-like protein 4, mitochondrial isoform X1 [Cinnamomum micranthum f. kanehirae]
Phoebe_bournei_newGene_7636	--	--	Molecular Function: peroxidase activity (GO:0004601);; Cellular Component: extracellular region (GO:0005576);; Biological Process: response to oxidative stress (GO:0006979);; Molecular Function: heme binding (GO:0020037);; Biological Process: hydrogen peroxide catabolic process (GO:0042744);; Molecular Function: metal ion binding (GO:0046872);;	K00430|1.3e-41|egu:105047025|K00430 peroxidase [EC:1.11.1.7] | (RefSeq) peroxidase 72	--	--	Peroxidase	Peroxidase 72 OS=Arabidopsis thaliana OX=3702 GN=PER72 PE=1 SV=1	Peroxidase OS=Cinnamomum micranthum f. kanehirae OX=337451 GN=CKAN_02336000 PE=3 SV=1	Q	Secondary metabolites biosynthesis, transport and catabolism	peroxidase 72-like protein [Cinnamomum micranthum f. kanehirae]
Phoebe_bournei_newGene_8023	--	--	Molecular Function: DNA binding (GO:0003677);; Molecular Function: protein dimerization activity (GO:0046983);;	K18328|1.4e-55|nsy:104234532|K18328 lariat debranching enzyme [EC:3.1.-.-] | (RefSeq) lariat debranching enzyme isoform X1	--	--	Protein of unknown function (DUF 659)	--	BED-type domain-containing protein OS=Cinnamomum micranthum f. kanehirae OX=337451 GN=CKAN_00956200 PE=4 SV=1	S	Function unknown	hypothetical protein CKAN_00956200 [Cinnamomum micranthum f. kanehirae]
Phoebe_bournei_newGene_5385	[E]	Amino acid transport and metabolism	Molecular Function: catalytic activity (GO:0003824);;	--	--	--	Aminotransferase class-V	--	Putative cysteine desulfurase OS=Cinnamomum micranthum f. kanehirae OX=337451 GN=CKAN_02159900 PE=4 SV=1	J	Translation, ribosomal structure and biogenesis	hypothetical protein GIB67_004556 [Kingdonia uniflora]
Phoebe_bournei_newGene_1906	--	--	Cellular Component: integral component of membrane (GO:0016021);; Molecular Function: oxidoreductase activity, acting on CH-OH group of donors (GO:0016614);; Molecular Function: flavin adenine dinucleotide binding (GO:0050660);;	--	--	--	4Fe-4S binding domain	--	4Fe-4S ferredoxin-type domain-containing protein OS=Cinnamomum micranthum f. kanehirae OX=337451 GN=CKAN_01235500 PE=4 SV=1	E	Amino acid transport and metabolism	hypothetical protein CKAN_01235500 [Cinnamomum micranthum f. kanehirae]
Phoebe_bournei_newGene_10004	--	--	Molecular Function: nucleic acid binding (GO:0003676);; Molecular Function: zinc ion binding (GO:0008270);;	K12447|3.6e-11|csat:109127935|K12447 UDP-sugar pyrophosphorylase [EC:2.7.7.64] | (RefSeq) uncharacterized protein LOC109127935	--	--	Domain of unknown function (DUF4219)	--	Zinc finger, CCHC-type OS=Cinnamomum micranthum f. kanehirae OX=337451 GN=CKAN_02748400 PE=4 SV=1	L	Replication, recombination and repair	Zinc finger, CCHC-type [Cinnamomum micranthum f. kanehirae]
Phoebe_bournei_newGene_10227	--	--	--	--	--	--	--	--	Uncharacterized protein OS=Lupinus albus OX=3870 GN=Lalb_Chr10g0104021 PE=4 SV=1	--	--	hypothetical protein Lalb_Chr10g0104021 [Lupinus albus]
Phoebe_bournei_newGene_7868	[P]	Inorganic ion transport and metabolism	Molecular Function: carbonate dehydratase activity (GO:0004089);; Molecular Function: zinc ion binding (GO:0008270);;	K01674|1.7e-50|nnu:104601281|K01674 carbonic anhydrase [EC:4.2.1.1] | (RefSeq) alpha carbonic anhydrase 7	[R]	General function prediction only	Eukaryotic-type carbonic anhydrase	Alpha carbonic anhydrase 7 OS=Arabidopsis thaliana OX=3702 GN=ACA7 PE=2 SV=1	Alpha carbonic anhydrase 7 OS=Cinnamomum micranthum f. kanehirae OX=337451 GN=CKAN_00050000 PE=4 SV=1	P	Inorganic ion transport and metabolism	Alpha carbonic anhydrase 7 [Cinnamomum micranthum f. kanehirae]
Phoebe_bournei_newGene_12391	[M]	Cell wall/membrane/envelope biogenesis	Molecular Function: protein serine/threonine kinase activity (GO:0004674);; Molecular Function: ATP binding (GO:0005524);; Cellular Component: integral component of membrane (GO:0016021);;	K18195|2.9e-44|dcr:108224328|K18195 rhamnogalacturonan endolyase [EC:4.2.2.23] | (RefSeq) probable LRR receptor-like serine/threonine-protein kinase At3g47570	--	--	Protein tyrosine and serine/threonine kinase	Probable LRR receptor-like serine/threonine-protein kinase At3g47570 OS=Arabidopsis thaliana OX=3702 GN=At3g47570 PE=2 SV=1	LRR.XII-like protein OS=Cinnamomum micranthum f. kanehirae OX=337451 GN=CKAN_00731800 PE=3 SV=1	T	Signal transduction mechanisms	LRR.XII-like protein [Cinnamomum micranthum f. kanehirae]
Phoebe_bournei_newGene_8949	--	--	Biological Process: ribosomal small subunit biogenesis (GO:0042274);;	--	--	--	--	--	DUF150 domain-containing protein OS=Cinnamomum micranthum f. kanehirae OX=337451 GN=CKAN_01298200 PE=3 SV=1	S	Function unknown	hypothetical protein CKAN_01298200 [Cinnamomum micranthum f. kanehirae]
Phoebe_bournei_newGene_4914	--	--	--	--	--	--	Universal stress protein family	--	Usp domain-containing protein OS=Punica granatum OX=22663 GN=CDL15_Pgr003162 PE=4 SV=1	--	--	uncharacterized protein LOC105648989 [Jatropha curcas]
Phoebe_bournei_newGene_12494	--	--	Molecular Function: zinc ion binding (GO:0008270);;	K05849|5.8e-123|tcc:18613571|K05849 solute carrier family 8 (sodium/calcium exchanger) | (RefSeq) uncharacterized LOC18613571	[R]	General function prediction only	PPR repeat	Pentatricopeptide repeat-containing protein ELI1, chloroplastic OS=Arabidopsis thaliana OX=3702 GN=ELI1 PE=3 SV=1	Pentatricopeptide repeat OS=Macleaya cordata OX=56857 GN=BVC80_491g1 PE=4 SV=1	S	Function unknown	Pentatricopeptide repeat-containing protein eli1 protein [Thalictrum thalictroides]
Phoebe_bournei_newGene_9624	--	--	Cellular Component: integral component of membrane (GO:0016021);;	--	--	--	--	--	Zinc finger-like protein 1 isoform X2 OS=Cinnamomum micranthum f. kanehirae OX=337451 GN=CKAN_00649500 PE=3 SV=1	O	Posttranslational modification, protein turnover, chaperones	zinc finger-like protein 1 isoform X2 [Cinnamomum micranthum f. kanehirae]
Phoebe_bournei_newGene_5684	--	--	--	--	--	--	--	Albumin-2 OS=Lathyrus sativus OX=3860 PE=1 SV=2	Albumin-2 protein OS=Cinnamomum micranthum f. kanehirae OX=337451 GN=CKAN_01345900 PE=4 SV=1	--	--	albumin-2 protein [Cinnamomum micranthum f. kanehirae]
Phoebe_bournei_newGene_11494	--	--	Biological Process: response to sucrose (GO:0009744);; Molecular Function: kinase activity (GO:0016301);; Biological Process: cellular response to nitrogen levels (GO:0043562);;	--	[G]	Carbohydrate transport and metabolism	5'-AMP-activated protein kinase beta subunit, interaction domain	SNF1-related protein kinase regulatory subunit beta-3 OS=Arabidopsis thaliana OX=3702 GN=KINB3 PE=1 SV=1	5-AMP-activated protein kinase OS=Cinnamomum micranthum f. kanehirae OX=337451 GN=CKAN_02077200 PE=3 SV=1	G	Carbohydrate transport and metabolism	5-AMP-activated protein kinase [Cinnamomum micranthum f. kanehirae]
Phoebe_bournei_newGene_8106	--	--	--	--	--	--	--	--	Transpos_assoc domain-containing protein OS=Cinnamomum micranthum f. kanehirae OX=337451 GN=CKAN_00569900 PE=4 SV=1	--	--	hypothetical protein CKAN_00569900 [Cinnamomum micranthum f. kanehirae]
Phoebe_bournei_newGene_3562	[I]	Lipid transport and metabolism	Molecular Function: iron ion binding (GO:0005506);; Biological Process: lipid biosynthetic process (GO:0008610);; Cellular Component: integral component of membrane (GO:0016021);; Molecular Function: oxidoreductase activity (GO:0016491);;	K14423|1.0e-130|nnu:104611828|K14423 plant 4,4-dimethylsterol C-4alpha-methyl-monooxygenase [EC:1.14.18.10] | (RefSeq) methylsterol monooxygenase 1-1-like	[I]	Lipid transport and metabolism	Fatty acid hydroxylase superfamily	Very-long-chain aldehyde decarbonylase GL1-10 OS=Oryza sativa subsp. japonica OX=39947 GN=GL1-10 PE=2 SV=1	Fatty acid hydroxylase OS=Cinnamomum micranthum f. kanehirae OX=337451 GN=CKAN_01243200 PE=3 SV=1	I	Lipid transport and metabolism	Fatty acid hydroxylase [Cinnamomum micranthum f. kanehirae]
Phoebe_bournei_newGene_10361	[O]	Posttranslational modification, protein turnover, chaperones	Molecular Function: threonine-type endopeptidase activity (GO:0004298);; Cellular Component: nucleus (GO:0005634);; Cellular Component: cytoplasm (GO:0005737);; Cellular Component: proteasome core complex, beta-subunit complex (GO:0019774);; Biological Process: proteasome-mediated ubiquitin-dependent protein catabolic process (GO:0043161);;	K02735|5.2e-78|nnu:104587556|K02735 20S proteasome subunit beta 3 [EC:3.4.25.1] | (RefSeq) proteasome subunit beta type-3	[O]	Posttranslational modification, protein turnover, chaperones	Proteasome subunit	Proteasome subunit beta type-3 OS=Picea mariana OX=3335 GN=PBC1 PE=2 SV=1	Proteasome subunit beta OS=Cinnamomum micranthum f. kanehirae OX=337451 GN=CKAN_02394200 PE=3 SV=1	O	Posttranslational modification, protein turnover, chaperones	proteasome subunit beta type-3 [Cinnamomum micranthum f. kanehirae]
Phoebe_bournei_newGene_5486	--	--	Molecular Function: protein serine/threonine kinase activity (GO:0004674);; Molecular Function: ATP binding (GO:0005524);; Cellular Component: integral component of membrane (GO:0016021);; Molecular Function: carbohydrate binding (GO:0030246);; Biological Process: recognition of pollen (GO:0048544);;	--	--	--	--	Receptor-like serine/threonine-protein kinase SD1-7 OS=Arabidopsis thaliana OX=3702 GN=SD17 PE=1 SV=1	Receptor-like serine/threonine-protein kinase OS=Cinnamomum micranthum f. kanehirae OX=337451 GN=CKAN_01716700 PE=3 SV=1	T	Signal transduction mechanisms	G-type lectin S-receptor-like serine/threonine-protein kinase RKS1 [Cinnamomum micranthum f. kanehirae]
Phoebe_bournei_newGene_11677	--	--	Molecular Function: DNA binding (GO:0003677);; Cellular Component: nucleus (GO:0005634);; Cellular Component: host cell nucleus (GO:0042025);; Molecular Function: metal ion binding (GO:0046872);;	K20641|2.0e-11|cvr:CHLNCDRAFT_59250|K20641 Rho GTPase-activating protein 20 | (RefSeq) hypothetical protein	--	--	SBP domain	Squamosa promoter-binding-like protein 1 OS=Arabidopsis thaliana OX=3702 GN=SPL1 PE=1 SV=2	Squamosa promoter-binding-like protein 1 OS=Cinnamomum micranthum f. kanehirae OX=337451 GN=CKAN_01810700 PE=4 SV=1	S	Function unknown	squamosa promoter-binding-like protein 1 [Cinnamomum micranthum f. kanehirae]
Phoebe_bournei_newGene_11807	--	--	--	--	--	--	Protein of unknown function (DUF674)	--	Uncharacterized protein OS=Cinnamomum micranthum f. kanehirae OX=337451 GN=CKAN_02620300 PE=4 SV=1	S	Function unknown	hypothetical protein CKAN_02620300 [Cinnamomum micranthum f. kanehirae]
Phoebe_bournei_newGene_8759	--	--	Biological Process: mitochondrial fission (GO:0000266);; Cellular Component: mitochondrial outer membrane (GO:0005741);; Cellular Component: integral component of membrane (GO:0016021);; Biological Process: peroxisome fission (GO:0016559);;	K17969|2.9e-69|egu:105049102|K17969 mitochondrial fission 1 protein | (RefSeq) mitochondrial fission 1 protein A	[M]	Cell wall/membrane/envelope biogenesis	Fis1 C-terminal tetratricopeptide repeat	Mitochondrial fission 1 protein A OS=Arabidopsis thaliana OX=3702 GN=FIS1A PE=1 SV=1	Mitochondrial fission 1 protein OS=Cinnamomum micranthum f. kanehirae OX=337451 GN=CKAN_00847700 PE=3 SV=1	M	Cell wall/membrane/envelope biogenesis	mitochondrial fission 1 protein A [Cinnamomum micranthum f. kanehirae]
Phoebe_bournei_newGene_3541	--	--	--	--	--	--	--	--	Transposon, En/Spm-like protein OS=Cinnamomum micranthum f. kanehirae OX=337451 GN=CKAN_02743400 PE=4 SV=1	--	--	Transposon, En/Spm-like protein [Cinnamomum micranthum f. kanehirae]
Phoebe_bournei_newGene_11796	--	--	Cellular Component: signal recognition particle, endoplasmic reticulum targeting (GO:0005786);; Biological Process: SRP-dependent cotranslational protein targeting to membrane (GO:0006614);; Molecular Function: 7S RNA binding (GO:0008312);; Molecular Function: endoplasmic reticulum signal peptide binding (GO:0030942);;	K03104|8.0e-36|qsu:112034403|K03104 signal recognition particle subunit SRP14 | (RefSeq) signal recognition particle 14 kDa protein-like	[U]	Intracellular trafficking, secretion, and vesicular transport	Signal recognition particle 14kD protein	Signal recognition particle 14 kDa protein OS=Arabidopsis thaliana OX=3702 GN=SRP14 PE=2 SV=2	Signal recognition particle protein isoform X2 OS=Cinnamomum micranthum f. kanehirae OX=337451 GN=CKAN_02620800 PE=3 SV=1	U	Intracellular trafficking, secretion, and vesicular transport	signal recognition particle protein isoform X2 [Cinnamomum micranthum f. kanehirae]
Phoebe_bournei_newGene_4719	--	--	Molecular Function: 5'-nucleotidase activity (GO:0008253);; Biological Process: deoxyribonucleotide catabolic process (GO:0009264);;	--	--	--	5' nucleotidase, deoxy (Pyrimidine), cytosolic type C protein (NT5C)	--	Uncharacterized protein OS=Cinnamomum micranthum f. kanehirae OX=337451 GN=CKAN_02517500 PE=4 SV=1	S	Function unknown	hypothetical protein CKAN_02517500 [Cinnamomum micranthum f. kanehirae]
Phoebe_bournei_newGene_6970	--	--	Molecular Function: magnesium ion binding (GO:0000287);; Molecular Function: terpene synthase activity (GO:0010333);;	K15803|5.0e-25|qsu:112016934|K15803 (-)-germacrene D synthase [EC:4.2.3.75] | (RefSeq) (-)-germacrene D synthase-like	--	--	Terpene synthase, N-terminal domain	Beta-cubebene synthase OS=Magnolia grandiflora OX=3406 PE=1 SV=1	Terpene synthase 1 OS=Cinnamomum micranthum f. kanehirae OX=337451 GN=CKAN_02388700 PE=4 SV=1	S	Function unknown	terpene synthase 1 [Cinnamomum micranthum f. kanehirae]
Phoebe_bournei_newGene_10653	--	--	--	--	--	--	Domain of unknown function (DUF702)	Protein LATERAL ROOT PRIMORDIUM 1 OS=Arabidopsis thaliana OX=3702 GN=LRP1 PE=1 SV=1	Protein LATERAL ROOT PRIMORDIUM 1-like protein OS=Cinnamomum micranthum f. kanehirae OX=337451 GN=CKAN_00822000 PE=3 SV=1	S	Function unknown	protein LATERAL ROOT PRIMORDIUM 1-like protein [Cinnamomum micranthum f. kanehirae]
Phoebe_bournei_newGene_9503	--	--	Cellular Component: spliceosomal complex (GO:0005681);; Biological Process: RNA splicing (GO:0008380);;	K12817|3.5e-164|nnu:104611938|K12817 pre-mRNA-splicing factor 18 | (RefSeq) pre-mRNA-splicing factor 18	[A]	RNA processing and modification	Prp18 domain	--	Pre-mRNA-splicing factor 18 OS=Cinnamomum micranthum f. kanehirae OX=337451 GN=CKAN_00622600 PE=3 SV=1	A	RNA processing and modification	pre-mRNA-splicing factor 18 [Cinnamomum micranthum f. kanehirae]
Phoebe_bournei_newGene_8768	--	--	--	K19090|9.5e-30|fve:101300361|K19090 CRISPR-associated protein Cas5t | (RefSeq) putative pentatricopeptide repeat-containing protein At3g05240	[R]	General function prediction only	PPR repeat	Pentatricopeptide repeat-containing protein At2g03380, mitochondrial OS=Arabidopsis thaliana OX=3702 GN=PCMP-E47 PE=3 SV=1	Putative pentatricopeptide repeat-containing protein OS=Cinnamomum micranthum f. kanehirae OX=337451 GN=CKAN_00843300 PE=4 SV=1	S	Function unknown	putative pentatricopeptide repeat-containing protein [Cinnamomum micranthum f. kanehirae]
Phoebe_bournei_newGene_6694	--	--	Molecular Function: DNA-binding transcription factor activity (GO:0003700);; Cellular Component: nucleus (GO:0005634);;	K09264|6.4e-20|pop:7489787|K09264 MADS-box transcription factor, plant | (RefSeq) MADS-box transcription factor 23 isoform X1	[K]	Transcription	K-box region	Agamous-like MADS-box protein AGL16 OS=Arabidopsis thaliana OX=3702 GN=AGL16 PE=1 SV=1	K-box domain-containing protein OS=Populus trichocarpa OX=3694 GN=POPTR_005G150501 PE=4 SV=1	K	Transcription	hypothetical protein POPTR_005G150501 [Populus trichocarpa]
Phoebe_bournei_newGene_1651	--	--	--	K09122|5.2e-90|sbi:8057957|K09122 uncharacterized protein | (RefSeq) uncharacterized protein LOC8057957	--	--	Protein of unknown function (DUF707)	--	uncharacterized protein LOC103716141 OS=Phoenix dactylifera OX=42345 GN=LOC103716141 PE=4 SV=1	S	Function unknown	uncharacterized protein LOC103716141 [Phoenix dactylifera]
Phoebe_bournei_newGene_2535	--	--	Molecular Function: protein binding (GO:0005515);;	--	--	--	FBD	F-box/FBD/LRR-repeat protein At1g13570 OS=Arabidopsis thaliana OX=3702 GN=At1g13570 PE=2 SV=1	F-box/FBD/LRR-repeat protein OS=Cinnamomum micranthum f. kanehirae OX=337451 GN=CKAN_00996400 PE=4 SV=1	S	Function unknown	F-box/FBD/LRR-repeat protein [Cinnamomum micranthum f. kanehirae]
Phoebe_bournei_newGene_12420	--	--	Molecular Function: DNA binding (GO:0003677);; Cellular Component: nucleus (GO:0005634);;	K09422|2.2e-88|vvi:100853539|K09422 transcription factor MYB, plant | (RefSeq) transcription factor RAX3	[K]	Transcription	Myb-like DNA-binding domain	Transcription factor RAX3 OS=Arabidopsis thaliana OX=3702 GN=RAX3 PE=2 SV=1	Transcription factor RAX3 OS=Cinnamomum micranthum f. kanehirae OX=337451 GN=CKAN_00642600 PE=4 SV=1	--	--	transcription factor RAX3 [Cinnamomum micranthum f. kanehirae]
Phoebe_bournei_newGene_5428	--	--	Cellular Component: integral component of membrane (GO:0016021);; Molecular Function: transmembrane transporter activity (GO:0022857);;	K14638|3.8e-151|mdm:114819518|K14638 solute carrier family 15 (peptide/histidine transporter), member 3/4 | (RefSeq) protein NRT1/ PTR FAMILY 2.6-like	[E]	Amino acid transport and metabolism	POT family	Protein NRT1/ PTR FAMILY 2.6 OS=Arabidopsis thaliana OX=3702 GN=NPF2.6 PE=2 SV=1	Protein NRT1/ PTR FAMILY 2.7-like protein OS=Cinnamomum micranthum f. kanehirae OX=337451 GN=CKAN_00537900 PE=3 SV=1	E	Amino acid transport and metabolism	protein NRT1/ PTR FAMILY 2.7-like protein [Cinnamomum micranthum f. kanehirae]
Phoebe_bournei_newGene_11636	[G]	Carbohydrate transport and metabolism	Molecular Function: 1,4-alpha-glucan branching enzyme activity (GO:0003844);; Molecular Function: hydrolase activity, hydrolyzing O-glycosyl compounds (GO:0004553);; Biological Process: glycogen biosynthetic process (GO:0005978);; Molecular Function: cation binding (GO:0043169);;	K00700|2.2e-207|nnu:104594060|K00700 1,4-alpha-glucan branching enzyme [EC:2.4.1.18] | (RefSeq) 1,4-alpha-glucan-branching enzyme 3, chloroplastic/amyloplastic	[G]	Carbohydrate transport and metabolism	Carbohydrate-binding module 48 (Isoamylase N-terminal domain)	1,4-alpha-glucan-branching enzyme 3, chloroplastic/amyloplastic OS=Arabidopsis thaliana OX=3702 GN=SBE3 PE=1 SV=1	1,4-alpha-glucan branching enzyme OS=Cinnamomum micranthum f. kanehirae OX=337451 GN=CKAN_01807200 PE=3 SV=1	G	Carbohydrate transport and metabolism	1,4-alpha-glucan-branching enzyme 3, chloroplastic/amyloplastic [Cinnamomum micranthum f. kanehirae]
Phoebe_bournei_newGene_12198	--	--	Molecular Function: DNA binding (GO:0003677);;	--	--	--	Replication factor-A C terminal domain	--	Replication protein A DNA-binding subunit B-like protein OS=Cinnamomum micranthum f. kanehirae OX=337451 GN=CKAN_00665800 PE=4 SV=1	--	--	replication protein A DNA-binding subunit B-like protein [Cinnamomum micranthum f. kanehirae]
Phoebe_bournei_newGene_1437	--	--	--	--	--	--	Plant transposase (Ptta/En/Spm family)	--	Bromodomain-containing protein 4-like protein isoform X3 OS=Cinnamomum micranthum f. kanehirae OX=337451 GN=CKAN_02417100 PE=4 SV=1	S	Function unknown	bromodomain-containing protein 4-like protein isoform X3 [Cinnamomum micranthum f. kanehirae]
Phoebe_bournei_newGene_7711	[C]	Energy production and conversion	Biological Process: carbohydrate metabolic process (GO:0005975);; Biological Process: tricarboxylic acid cycle (GO:0006099);; Biological Process: malate metabolic process (GO:0006108);; Molecular Function: L-malate dehydrogenase activity (GO:0030060);;	K00026|4.9e-152|nnu:104613084|K00026 malate dehydrogenase [EC:1.1.1.37] | (RefSeq) malate dehydrogenase, mitochondrial-like	[C]	Energy production and conversion	lactate/malate dehydrogenase, alpha/beta C-terminal domain	Malate dehydrogenase, mitochondrial OS=Citrullus lanatus OX=3654 GN=MMDH PE=1 SV=1	Malate dehydrogenase OS=Cinnamomum micranthum f. kanehirae OX=337451 GN=CKAN_02575200 PE=3 SV=1	C	Energy production and conversion	malate dehydrogenase, mitochondrial-like protein [Cinnamomum micranthum f. kanehirae]
Phoebe_bournei_newGene_5134	--	--	--	--	--	--	Agenet domain	--	DUF724 domain-containing protein 2 OS=Cinnamomum micranthum f. kanehirae OX=337451 GN=CKAN_01056200 PE=4 SV=1	S	Function unknown	DUF724 domain-containing protein 2 [Cinnamomum micranthum f. kanehirae]
Phoebe_bournei_newGene_2234	--	--	--	--	--	--	--	--	Reticulon-like protein B8 OS=Cinnamomum micranthum f. kanehirae OX=337451 GN=CKAN_01466500 PE=4 SV=1	--	--	reticulon-like protein B8 [Cinnamomum micranthum f. kanehirae]
Phoebe_bournei_newGene_3412	--	--	Molecular Function: peroxidase activity (GO:0004601);; Biological Process: response to oxidative stress (GO:0006979);; Molecular Function: heme binding (GO:0020037);; Biological Process: hydrogen peroxide catabolic process (GO:0042744);; Molecular Function: metal ion binding (GO:0046872);;	K00430|2.4e-47|egu:105034682|K00430 peroxidase [EC:1.11.1.7] | (RefSeq) peroxidase 3	--	--	Peroxidase	Peroxidase 39 OS=Arabidopsis thaliana OX=3702 GN=PER39 PE=1 SV=1	Peroxidase OS=Cinnamomum micranthum f. kanehirae OX=337451 GN=CKAN_01742500 PE=3 SV=1	Q	Secondary metabolites biosynthesis, transport and catabolism	Plant peroxidase [Cinnamomum micranthum f. kanehirae]
Phoebe_bournei_newGene_8152	--	--	Biological Process: defense response (GO:0006952);; Cellular Component: integral component of membrane (GO:0016021);;	--	--	--	Myb/SANT-like DNA-binding domain	--	L10-interacting MYB domain-containing-like protein OS=Cinnamomum micranthum f. kanehirae OX=337451 GN=CKAN_02215300 PE=3 SV=1	S	Function unknown	L10-interacting MYB domain-containing-like protein [Cinnamomum micranthum f. kanehirae]
Phoebe_bournei_newGene_10048	[J]	Translation, ribosomal structure and biogenesis	Molecular Function: structural constituent of ribosome (GO:0003735);; Cellular Component: ribosome (GO:0005840);; Biological Process: translation (GO:0006412);;	K02974|2.5e-58|ini:109180976|K02974 small subunit ribosomal protein S24e | (RefSeq) 40S ribosomal protein S24-1	[J]	Translation, ribosomal structure and biogenesis	Ribosomal protein S24e	40S ribosomal protein S24-1 OS=Arabidopsis thaliana OX=3702 GN=RPS24A PE=2 SV=1	40S ribosomal protein S24 OS=Cinnamomum micranthum f. kanehirae OX=337451 GN=CKAN_00906700 PE=3 SV=1	J	Translation, ribosomal structure and biogenesis	40S ribosomal protein S24-1 [Cinnamomum micranthum f. kanehirae]
Phoebe_bournei_newGene_1559	--	--	Cellular Component: Golgi membrane (GO:0000139);; Cellular Component: storage vacuole (GO:0000322);; Cellular Component: plant-type vacuole (GO:0000325);; Cellular Component: protein storage vacuole (GO:0000326);; Cellular Component: cellular_component (GO:0005575);; Cellular Component: intracellular (GO:0005622);; Cellular Component: obsolete cell (GO:0005623);; Cellular Component: cytoplasm (GO…	K15728|1.2e-281|nnu:104599243|K15728 phosphatidate phosphatase LPIN [EC:3.1.3.4] | (RefSeq) phosphatidate phosphatase PAH1-like	[NI]	--	LNS2 (Lipin/Ned1/Smp2)	Phosphatidate phosphatase PAH1 OS=Arabidopsis thaliana OX=3702 GN=PAH1 PE=1 SV=1	Phosphatidate phosphatase OS=Cinnamomum micranthum f. kanehirae OX=337451 GN=CKAN_00532000 PE=3 SV=1	S	Function unknown	phosphatidate phosphatase PAH1-like protein isoform X1 [Cinnamomum micranthum f. kanehirae]
Phoebe_bournei_newGene_8401	--	--	Biological Process: cell fate specification (GO:0001708);; Cellular Component: cellular_component (GO:0005575);; Cellular Component: intracellular (GO:0005622);; Cellular Component: obsolete cell (GO:0005623);; Cellular Component: cytoplasm (GO:0005737);; Cellular Component: Golgi apparatus (GO:0005794);; Biological Process: transport (GO:0006810);; Biological Process: vacuolar transport (GO:0007…	K19513|3.2e-241|nnu:104611385|K19513 protein CLEC16A | (RefSeq) uncharacterized LOC104611385	[S]	Function unknown	Uncharacterised conserved protein	Protein TRANSPARENT TESTA 9 OS=Arabidopsis thaliana OX=3702 GN=TT9 PE=2 SV=1	FPL domain-containing protein OS=Cinnamomum micranthum f. kanehirae OX=337451 GN=CKAN_00361900 PE=3 SV=1	O	Posttranslational modification, protein turnover, chaperones	FPL domain-containing protein [Cinnamomum micranthum f. kanehirae]
Phoebe_bournei_newGene_4785	--	--	--	--	--	--	--	--	Uncharacterized protein OS=Cinnamomum micranthum f. kanehirae OX=337451 GN=CKAN_02538400 PE=4 SV=1	--	--	hypothetical protein CKAN_02538400 [Cinnamomum micranthum f. kanehirae]
Phoebe_bournei_newGene_11121	--	--	Molecular Function: protein kinase activity (GO:0004672);; Molecular Function: ATP binding (GO:0005524);; Cellular Component: integral component of membrane (GO:0016021);;	--	--	--	--	Rust resistance kinase Lr10 OS=Triticum aestivum OX=4565 GN=LRK10 PE=2 SV=1	Rust resistance kinase Lr10 isoform X1 OS=Cinnamomum micranthum f. kanehirae OX=337451 GN=CKAN_02275500 PE=4 SV=1	T	Signal transduction mechanisms	rust resistance kinase Lr10 isoform X1 [Cinnamomum micranthum f. kanehirae]
Phoebe_bournei_newGene_6037	--	--	Cellular Component: integral component of membrane (GO:0016021);;	K12386|3.7e-89|nnu:104591594|K12386 cystinosin | (RefSeq) cystinosin homolog	[E]	Amino acid transport and metabolism	PQ loop repeat	Cystinosin homolog OS=Arabidopsis thaliana OX=3702 GN=At5g40670 PE=2 SV=1	Cystinosin OS=Cinnamomum micranthum f. kanehirae OX=337451 GN=CKAN_01252000 PE=4 SV=1	E	Amino acid transport and metabolism	cystinosin [Cinnamomum micranthum f. kanehirae]
Phoebe_bournei_newGene_4398	--	--	Biological Process: ribosomal small subunit biogenesis (GO:0042274);;	--	--	--	--	--	DUF150 domain-containing protein OS=Cinnamomum micranthum f. kanehirae OX=337451 GN=CKAN_01298200 PE=3 SV=1	--	--	hypothetical protein CKAN_01298200 [Cinnamomum micranthum f. kanehirae]
Phoebe_bournei_newGene_9611	[O]	Posttranslational modification, protein turnover, chaperones	Cellular Component: mitochondrial inner membrane (GO:0005743);;	K14998|4.9e-100|nnu:104608446|K14998 surfeit locus 1 family protein | (RefSeq) surfeit locus protein 1	[C]	Energy production and conversion	SURF1 family	Surfeit locus protein 1 OS=Arabidopsis thaliana OX=3702 GN=SURF1 PE=2 SV=1	SURF1-like protein OS=Cinnamomum micranthum f. kanehirae OX=337451 GN=CKAN_00646800 PE=3 SV=1	C	Energy production and conversion	surfeit locus protein 1 [Cinnamomum micranthum f. kanehirae]
Phoebe_bournei_newGene_462	--	--	Cellular Component: nucleosome (GO:0000786);; Molecular Function: DNA binding (GO:0003677);; Cellular Component: nucleus (GO:0005634);; Molecular Function: protein heterodimerization activity (GO:0046982);;	K11253|2.2e-67|adu:107460150|K11253 histone H3 | (RefSeq) histone H3.3	[B]	Chromatin structure and dynamics	Core histone H2A/H2B/H3/H4	Histone H3.3 OS=Arabidopsis thaliana OX=3702 GN=HTR4 PE=1 SV=2	Histone H3 OS=Gossypium darwinii OX=34276 GN=ES288_A02G110500v1 PE=3 SV=1	B	Chromatin structure and dynamics	hypothetical protein CR513_38538, partial [Mucuna pruriens]
Phoebe_bournei_newGene_2380	[V]	Defense mechanisms	Molecular Function: ATP binding (GO:0005524);; Cellular Component: integral component of membrane (GO:0016021);; Molecular Function: ATPase activity (GO:0016887);; Molecular Function: ATPase-coupled transmembrane transporter activity (GO:0042626);;	K05666|1.5e-42|gmx:100818714|K05666 ATP-binding cassette, subfamily C (CFTR/MRP), member 2 | (RefSeq) ABC transporter C family member 3 isoform X3	[Q]	Secondary metabolites biosynthesis, transport and catabolism	ABC transporter	ABC transporter C family member 3 OS=Arabidopsis thaliana OX=3702 GN=ABCC3 PE=1 SV=1	ABC transporter C family member 3-like protein isoform X1 OS=Cinnamomum micranthum f. kanehirae OX=337451 GN=CKAN_00172300 PE=4 SV=1	Q	Secondary metabolites biosynthesis, transport and catabolism	ABC transporter C family member 3-like protein isoform X1 [Cinnamomum micranthum f. kanehirae]
Phoebe_bournei_newGene_7844	[O]	Posttranslational modification, protein turnover, chaperones	Molecular Function: ATP binding (GO:0005524);; Cellular Component: chaperonin-containing T-complex (GO:0005832);; Biological Process: protein folding (GO:0006457);; Molecular Function: unfolded protein binding (GO:0051082);;	K09494|2.3e-277|nnu:104604348|K09494 T-complex protein 1 subunit beta | (RefSeq) T-complex protein 1 subunit beta	[O]	Posttranslational modification, protein turnover, chaperones	TCP-1/cpn60 chaperonin family	T-complex protein 1 subunit beta OS=Arabidopsis thaliana OX=3702 GN=CCT2 PE=1 SV=1	CCT-beta OS=Cinnamomum micranthum f. kanehirae OX=337451 GN=CKAN_01335600 PE=3 SV=1	O	Posttranslational modification, protein turnover, chaperones	T-complex protein 1 subunit beta [Cinnamomum micranthum f. kanehirae]
Phoebe_bournei_newGene_1214	--	--	Molecular Function: cysteine-type peptidase activity (GO:0008234);;	--	--	--	Ulp1 protease family, C-terminal catalytic domain	--	Serine/threonine-protein phosphatase 7 long form isoform X1 OS=Cinnamomum micranthum f. kanehirae OX=337451 GN=CKAN_02258500 PE=3 SV=1	--	--	serine/threonine-protein phosphatase 7 long form isoform X1 [Cinnamomum micranthum f. kanehirae]
Phoebe_bournei_newGene_3583	--	--	Biological Process: cell redox homeostasis (GO:0045454);;	K17609|8.7e-37|mdm:103403022|K17609 nucleoredoxin [EC:1.8.1.8] | (RefSeq) probable nucleoredoxin 1	[R]	General function prediction only	Thioredoxin-like	Probable nucleoredoxin 1 OS=Arabidopsis thaliana OX=3702 GN=At1g60420 PE=1 SV=1	Putative nucleoredoxin 1 OS=Cinnamomum micranthum f. kanehirae OX=337451 GN=CKAN_00805100 PE=4 SV=1	O	Posttranslational modification, protein turnover, chaperones	putative nucleoredoxin 1 [Cinnamomum micranthum f. kanehirae]
Phoebe_bournei_newGene_4814	--	--	Biological Process: glycerol ether metabolic process (GO:0006662);; Molecular Function: protein disulfide oxidoreductase activity (GO:0015035);; Biological Process: cell redox homeostasis (GO:0045454);;	--	--	--	--	--	Thioredoxin-like protein OS=Cinnamomum micranthum f. kanehirae OX=337451 GN=CKAN_00036000 PE=4 SV=1	--	--	thioredoxin-like protein [Cinnamomum micranthum f. kanehirae]
Phoebe_bournei_newGene_2632	--	--	Molecular Function: ion channel activity (GO:0005216);; Molecular Function: calcium ion binding (GO:0005509);; Cellular Component: integral component of membrane (GO:0016021);;	K16900|8.9e-110|egu:105047346|K16900 two pore calcium channel protein, plant | (RefSeq) two pore calcium channel protein 1 isoform X1	[PT]	--	Ion transport protein	Two pore calcium channel protein 1B OS=Nicotiana tabacum OX=4097 GN=TPC1B PE=2 SV=1	Two pore calcium channel protein 1 isoform X1 OS=Cinnamomum micranthum f. kanehirae OX=337451 GN=CKAN_01819100 PE=3 SV=1	--	--	two pore calcium channel protein 1 isoform X1 [Cinnamomum micranthum f. kanehirae]
Phoebe_bournei_newGene_12956	[O]	Posttranslational modification, protein turnover, chaperones	Cellular Component: integral component of membrane (GO:0016021);; Biological Process: cell redox homeostasis (GO:0045454);;	K03671|2.1e-50|nnu:104595587|K03671 thioredoxin 1 | (RefSeq) thioredoxin H-type-like	[O]	Posttranslational modification, protein turnover, chaperones	Thioredoxin	Thioredoxin H-type OS=Ricinus communis OX=3988 PE=3 SV=1	Thioredoxin H-type-like protein OS=Cinnamomum micranthum f. kanehirae OX=337451 GN=CKAN_00216000 PE=4 SV=1	O	Posttranslational modification, protein turnover, chaperones	thioredoxin H-type-like protein [Cinnamomum micranthum f. kanehirae]
Phoebe_bournei_newGene_6972	--	--	Molecular Function: magnesium ion binding (GO:0000287);; Molecular Function: terpene synthase activity (GO:0010333);;	K15803|2.3e-166|cit:102606948|K15803 (-)-germacrene D synthase [EC:4.2.3.75] | (RefSeq) (-)-germacrene D synthase-like	--	--	Terpene synthase family, metal binding domain	Beta-cubebene synthase OS=Magnolia grandiflora OX=3406 PE=1 SV=1	Terpene synthase 1 OS=Cinnamomum micranthum f. kanehirae OX=337451 GN=CKAN_02276800 PE=4 SV=1	S	Function unknown	terpene synthase 1 [Cinnamomum micranthum f. kanehirae]
Phoebe_bournei_newGene_1553	--	--	Molecular Function: intramolecular lyase activity (GO:0016872);;	K01859|2.3e-44|nnu:104599237|K01859 chalcone isomerase [EC:5.5.1.6] | (RefSeq) chalcone--flavonone isomerase 2-like	--	--	Chalcone-flavanone isomerase	Chalcone--flavonone isomerase OS=Camellia sinensis OX=4442 GN=CHI PE=2 SV=2	Chalcone-flavonone isomerase family protein OS=Cinnamomum micranthum f. kanehirae OX=337451 GN=CKAN_00532200 PE=3 SV=1	S	Function unknown	chalcone--flavonone isomerase 2-like protein [Cinnamomum micranthum f. kanehirae]
Phoebe_bournei_newGene_9331	--	--	Molecular Function: beta-galactosidase activity (GO:0004565);; Biological Process: carbohydrate metabolic process (GO:0005975);; Molecular Function: carbohydrate binding (GO:0030246);;	K12309|8.9e-11|ath:AT3G52840|K12309 beta-galactosidase [EC:3.2.1.23] | (RefSeq) BGAL2; beta-galactosidase 2	[G]	Carbohydrate transport and metabolism	Beta-sandwich domain in beta galactosidase	Beta-galactosidase 8 OS=Arabidopsis thaliana OX=3702 GN=BGAL8 PE=2 SV=2	Beta-galactosidase OS=Cinnamomum micranthum f. kanehirae OX=337451 GN=CKAN_01327200 PE=3 SV=1	G	Carbohydrate transport and metabolism	beta-galactosidase 8-like protein isoform X2 [Cinnamomum micranthum f. kanehirae]
Phoebe_bournei_newGene_22	--	--	--	--	--	--	--	--	Uncharacterized protein (Fragment) OS=Papaver somniferum OX=3469 GN=C5167_038152 PE=4 SV=1	--	--	hypothetical protein C5167_038152, partial [Papaver somniferum]
Phoebe_bournei_newGene_10452	--	--	--	--	--	--	F-box domain	Putative F-box protein At4g22660 OS=Arabidopsis thaliana OX=3702 GN=At4g22660 PE=4 SV=1	F-box protein SKIP23-like OS=Nelumbo nucifera OX=4432 GN=LOC104586468 PE=4 SV=1	--	--	PREDICTED: F-box protein SKIP23-like [Nelumbo nucifera]
Phoebe_bournei_newGene_10066	--	--	Molecular Function: protein kinase activity (GO:0004672);; Molecular Function: ATP binding (GO:0005524);; Cellular Component: integral component of membrane (GO:0016021);;	K24104|2.6e-26|thj:104799061|K24104 GPN-loop GTPase | (RefSeq) LOW QUALITY PROTEIN: uncharacterized protein LOC104799061	--	--	Protein tyrosine and serine/threonine kinase	G-type lectin S-receptor-like serine/threonine-protein kinase At1g61420 OS=Arabidopsis thaliana OX=3702 GN=At1g61420 PE=3 SV=2	Putative receptor-like protein kinase isoform X1 OS=Cinnamomum micranthum f. kanehirae OX=337451 GN=CKAN_01727400 PE=4 SV=1	T	Signal transduction mechanisms	putative receptor-like protein kinase isoform X1 [Cinnamomum micranthum f. kanehirae]
Phoebe_bournei_newGene_1546	[M]	Cell wall/membrane/envelope biogenesis	Molecular Function: protein kinase activity (GO:0004672);; Molecular Function: ATP binding (GO:0005524);; Cellular Component: integral component of membrane (GO:0016021);;	K13435|3.3e-113|spen:107018783|K13435 serine/threonine-protein kinase Pto | (RefSeq) receptor-like protein kinase HERK 1 isoform X2	[T]	Signal transduction mechanisms	Protein tyrosine and serine/threonine kinase	Receptor-like protein kinase HERK 1 OS=Arabidopsis thaliana OX=3702 GN=HERK1 PE=1 SV=1	Putative receptor-like protein kinase HERK 1 OS=Davidia involucrata OX=16924 GN=Din_009856 PE=4 SV=1	T	Signal transduction mechanisms	Protein kinase domain [Macleaya cordata]
Phoebe_bournei_newGene_6112	--	--	--	--	--	--	--	--	Uncharacterized protein OS=Cinnamomum micranthum f. kanehirae OX=337451 GN=CKAN_00136900 PE=4 SV=1	--	--	hypothetical protein CKAN_00136900 [Cinnamomum micranthum f. kanehirae]
Phoebe_bournei_newGene_6589	--	--	--	--	--	--	--	--	F-box protein SKIP23-like protein OS=Cinnamomum micranthum f. kanehirae OX=337451 GN=CKAN_00378200 PE=4 SV=1	--	--	F-box protein SKIP23-like protein [Cinnamomum micranthum f. kanehirae]
Phoebe_bournei_newGene_8049	--	--	Molecular Function: RNA-directed DNA polymerase activity (GO:0003964);; Cellular Component: integral component of membrane (GO:0016021);;	K22686|3.5e-20|qsu:111995479|K22686 pro-apoptotic serine protease NMA111 [EC:3.4.21.-] | (RefSeq) protease Do-like 7	[R]	General function prediction only	zinc-binding in reverse transcriptase	--	Reverse transcriptase zinc-binding domain-containing protein OS=Cinnamomum micranthum f. kanehirae OX=337451 GN=CKAN_00346400 PE=4 SV=1	S	Function unknown	Reverse transcriptase zinc-binding domain-containing protein [Cinnamomum micranthum f. kanehirae]
Phoebe_bournei_newGene_9620	--	--	--	--	[Z]	Cytoskeleton	Interferon-related developmental regulator (IFRD)	--	Interferon-related developmental regulator 1-like protein OS=Cinnamomum micranthum f. kanehirae OX=337451 GN=CKAN_00648700 PE=3 SV=1	Z	Cytoskeleton	interferon-related developmental regulator 1-like protein [Cinnamomum micranthum f. kanehirae]
Phoebe_bournei_newGene_1375	--	--	Cellular Component: nucleus (GO:0005634);; Biological Process: regulation of transcription, DNA-templated (GO:0006355);; Molecular Function: zinc ion binding (GO:0008270);;	K17604|6.0e-160|nnu:104596238|K17604 zinc finger SWIM domain-containing protein 3 | (RefSeq) protein FAR1-RELATED SEQUENCE 5-like	--	--	MULE transposase domain	Protein FAR1-RELATED SEQUENCE 5 OS=Arabidopsis thaliana OX=3702 GN=FRS5 PE=1 SV=1	Protein FAR1-RELATED SEQUENCE OS=Cinnamomum micranthum f. kanehirae OX=337451 GN=CKAN_02153200 PE=3 SV=1	S	Function unknown	protein FAR1-RELATED SEQUENCE 5-like protein [Cinnamomum micranthum f. kanehirae]
Phoebe_bournei_newGene_4427	--	--	Molecular Function: UDP-glycosyltransferase activity (GO:0008194);;	K23260|3.1e-31|cmo:103495252|K23260 scopoletin glucosyltransferase [EC:2.4.1.128] | (RefSeq) scopoletin glucosyltransferase-like	[GC]	--	--	Crocetin glucosyltransferase 3 OS=Crocus sativus OX=82528 GN=GLT3 PE=1 SV=1	UDP-glycosyltransferase 92A1 OS=Cinnamomum micranthum f. kanehirae OX=337451 GN=CKAN_01804600 PE=3 SV=1	--	--	UDP-glycosyltransferase 92A1 [Cinnamomum micranthum f. kanehirae]
Phoebe_bournei_newGene_8631	--	--	Cellular Component: nucleus (GO:0005634);;	--	--	--	--	--	CCT domain-containing protein OS=Cinnamomum micranthum f. kanehirae OX=337451 GN=CKAN_02584500 PE=4 SV=1	K	Transcription	CCT domain-containing protein [Cinnamomum micranthum f. kanehirae]
Phoebe_bournei_newGene_12120	--	--	Cellular Component: integral component of membrane (GO:0016021);; Molecular Function: metal ion binding (GO:0046872);;	--	--	--	--	--	TRAF-type zinc finger domain-containing protein 1 OS=Cinnamomum micranthum f. kanehirae OX=337451 GN=CKAN_01188400 PE=4 SV=1	S	Function unknown	TRAF-type zinc finger domain-containing protein 1 [Cinnamomum micranthum f. kanehirae]
Phoebe_bournei_newGene_10065	--	--	--	--	--	--	TNP1/EN/SPM transposase	--	Putative transposase, Tnp1/En/Spm OS=Rosa chinensis OX=74649 GN=RchiOBHm_Chr5g0060161 PE=4 SV=1	--	--	uncharacterized protein LOC111401263 isoform X2 [Olea europaea var. sylvestris]
Phoebe_bournei_newGene_7638	[O]	Posttranslational modification, protein turnover, chaperones	--	K09515|4.5e-16|gsl:Gasu_23410|K09515 DnaJ homolog subfamily B member 9 | (RefSeq) molecular chaperone DnaJ	[O]	Posttranslational modification, protein turnover, chaperones	X-domain of DnaJ-containing	Chaperone protein dnaJ 10 OS=Arabidopsis thaliana OX=3702 GN=ATJ10 PE=2 SV=2	Chaperone protein dnaJ 10-like protein OS=Cinnamomum micranthum f. kanehirae OX=337451 GN=CKAN_02336700 PE=4 SV=1	O	Posttranslational modification, protein turnover, chaperones	chaperone protein dnaJ 10-like protein [Cinnamomum micranthum f. kanehirae]
Phoebe_bournei_newGene_13220	--	--	Molecular Function: protein binding (GO:0005515);;	K01322|5.8e-11|csat:104767606|K01322 prolyl oligopeptidase [EC:3.4.21.26] | (RefSeq) putative F-box/LRR-repeat protein At3g18150	--	--	Leucine Rich repeats (2 copies)	F-box/FBD/LRR-repeat protein At1g13570 OS=Arabidopsis thaliana OX=3702 GN=At1g13570 PE=2 SV=1	F-box/FBD/LRR-repeat-like protein OS=Cinnamomum micranthum f. kanehirae OX=337451 GN=CKAN_00898600 PE=4 SV=1	S	Function unknown	F-box/FBD/LRR-repeat-like protein [Cinnamomum micranthum f. kanehirae]
Phoebe_bournei_newGene_9533	--	--	--	--	--	--	--	--	Transducin/WD40 repeat-like superfamily protein isoform 3 OS=Cucumis melo var. makuwa OX=1194695 GN=E5676_scaffold204G00260 PE=4 SV=1	S	Function unknown	Transducin/WD40 repeat-like superfamily protein isoform 3 [Cucumis melo var. makuwa]
Phoebe_bournei_newGene_4869	--	--	--	--	--	--	Plant transposase (Ptta/En/Spm family)	--	Uncharacterized protein OS=Asparagus officinalis OX=4686 GN=A4U43_C01F11230 PE=4 SV=1	S	Function unknown	uncharacterized protein LOC114307295 [Camellia sinensis]
Phoebe_bournei_newGene_2395	--	--	Biological Process: reproduction (GO:0000003);; Biological Process: cell morphogenesis (GO:0000902);; Biological Process: cell morphogenesis involved in differentiation (GO:0000904);; Biological Process: developmental process involved in reproduction (GO:0003006);; Cellular Component: cellular_component (GO:0005575);; Cellular Component: obsolete cell (GO:0005623);; Cellular Component: plasma mem…	K23541|2.9e-42|egu:105051209|K23541 Ca2+/H+ antiporter, TMEM165/GDT1 family | (RefSeq) LOW QUALITY PROTEIN: uncharacterized protein LOC105051209	--	--	P21-Rho-binding domain	CRIB domain-containing protein RIC4 OS=Arabidopsis thaliana OX=3702 GN=RIC4 PE=1 SV=1	CRIB domain-containing protein RIC4-like protein OS=Cinnamomum micranthum f. kanehirae OX=337451 GN=CKAN_00854500 PE=4 SV=1	S	Function unknown	CRIB domain-containing protein RIC4-like protein [Cinnamomum micranthum f. kanehirae]
Phoebe_bournei_newGene_3005	--	--	Molecular Function: protein phosphatase inhibitor activity (GO:0004864);; Biological Process: regulation of signal transduction (GO:0009966);;	K16833|6.0e-44|vvi:100254986|K16833 protein phosphatase inhibitor 2 | (RefSeq) protein phosphatase inhibitor 2	--	--	Protein phosphatase inhibitor 2 (IPP-2)	Protein phosphatase inhibitor 2 OS=Arabidopsis thaliana OX=3702 GN=I-2 PE=1 SV=1	Protein phosphatase inhibitor 2 isoform X1 OS=Cinnamomum micranthum f. kanehirae OX=337451 GN=CKAN_01551700 PE=4 SV=1	S	Function unknown	protein phosphatase inhibitor 2 isoform X1 [Cinnamomum micranthum f. kanehirae]
Phoebe_bournei_newGene_6915	--	--	--	K17413|2.0e-13|ini:109188018|K17413 small subunit ribosomal protein S35 | (RefSeq) uncharacterized LOC109188018	[R]	General function prediction only	Reverse transcriptase (RNA-dependent DNA polymerase)	Retrovirus-related Pol polyprotein from transposon RE1 OS=Arabidopsis thaliana OX=3702 GN=RE1 PE=2 SV=1	RmlC-like cupins superfamily protein OS=Prunus dulcis OX=3755 GN=Prudu_007974 PE=4 SV=1	L	Replication, recombination and repair	RmlC-like cupins superfamily protein [Prunus dulcis]
Phoebe_bournei_newGene_6026	--	--	Molecular Function: protein kinase activity (GO:0004672);; Molecular Function: ATP binding (GO:0005524);;	--	--	--	--	--	Transposase OS=Cinnamomum micranthum f. kanehirae OX=337451 GN=CKAN_01728100 PE=4 SV=1	S	Function unknown	transposase [Cinnamomum micranthum f. kanehirae]
Phoebe_bournei_newGene_10857	--	--	Molecular Function: protein kinase activity (GO:0004672);; Molecular Function: ATP binding (GO:0005524);;	--	--	--	Transposase family tnp2	--	Transposase OS=Cinnamomum micranthum f. kanehirae OX=337451 GN=CKAN_01728100 PE=4 SV=1	S	Function unknown	transposase [Cinnamomum micranthum f. kanehirae]
Phoebe_bournei_newGene_9838	--	--	Cellular Component: membrane (GO:0016020);;	K09775|1.2e-09|dzi:111283728|K09775 uncharacterized protein | (RefSeq) uncharacterized protein LOC111283728 isoform X1	--	--	Core-2/I-Branching enzyme	Glycosyltransferase BC10 OS=Oryza sativa subsp. japonica OX=39947 GN=BC10 PE=1 SV=1	Uncharacterized protein OS=Cinnamomum micranthum f. kanehirae OX=337451 GN=CKAN_01422400 PE=4 SV=1	S	Function unknown	hypothetical protein CKAN_01422400 [Cinnamomum micranthum f. kanehirae]
Phoebe_bournei_newGene_3932	--	--	Molecular Function: aspartic-type endopeptidase activity (GO:0004190);;	--	[O]	Posttranslational modification, protein turnover, chaperones	Xylanase inhibitor N-terminal	Aspartyl protease family protein 1 OS=Arabidopsis thaliana OX=3702 GN=APF1 PE=2 SV=1	Aspartyl protease family protein 1-like protein OS=Cinnamomum micranthum f. kanehirae OX=337451 GN=CKAN_01980700 PE=3 SV=1	O	Posttranslational modification, protein turnover, chaperones	aspartyl protease family protein 1-like protein [Cinnamomum micranthum f. kanehirae]
Phoebe_bournei_newGene_1694	--	--	--	K01593|3.8e-11|mtr:MTR_7g058700|K01593 aromatic-L-amino-acid/L-tryptophan decarboxylase [EC:4.1.1.28 4.1.1.105] | (RefSeq) tyrosine/DOPA decarboxylase	--	--	Protein of unknown function (DUF674)	--	Uncharacterized protein OS=Cinnamomum micranthum f. kanehirae OX=337451 GN=CKAN_01264500 PE=4 SV=1	S	Function unknown	hypothetical protein CKAN_01264500 [Cinnamomum micranthum f. kanehirae]
Phoebe_bournei_newGene_2735	--	--	Biological Process: intracellular protein transport (GO:0006886);;	K13141|5.5e-74|csat:104745793|K13141 integrator complex subunit 4 | (RefSeq) protein SIEL-like	[U]	Intracellular trafficking, secretion, and vesicular transport	VHS domain	TOM1-like protein 3 OS=Arabidopsis thaliana OX=3702 GN=TOL3 PE=1 SV=1	Target of Myb protein 1 OS=Cinnamomum micranthum f. kanehirae OX=337451 GN=CKAN_00716500 PE=3 SV=1	U	Intracellular trafficking, secretion, and vesicular transport	target of Myb protein 1 [Cinnamomum micranthum f. kanehirae]
Phoebe_bournei_newGene_1519	--	--	Molecular Function: double-stranded DNA binding (GO:0003690);; Biological Process: regulation of transcription, DNA-templated (GO:0006355);;	K15032|2.0e-55|nnu:104606723|K15032 mTERF domain-containing protein, mitochondrial | (RefSeq) uncharacterized LOC104606723	[KR]	--	mTERF	--	Mitochodrial transcription termination factor-related OS=Macleaya cordata OX=56857 GN=BVC80_9099g64 PE=3 SV=1	K	Transcription	Mitochodrial transcription termination factor-related [Macleaya cordata]
Phoebe_bournei_newGene_7274	--	--	--	--	--	--	--	--	Uncharacterized protein OS=Beta vulgaris subsp. vulgaris OX=3555 GN=BVRB_023710 PE=4 SV=1	--	--	hypothetical protein BVRB_023710 [Beta vulgaris subsp. vulgaris]
Phoebe_bournei_newGene_32	[I]	Lipid transport and metabolism	Cellular Component: integral component of membrane (GO:0016021);; Molecular Function: transferase activity, transferring acyl groups (GO:0016746);;	K13513|1.6e-166|nnu:104595775|K13513 lysocardiolipin and lysophospholipid acyltransferase [EC:2.3.1.- 2.3.1.51] | (RefSeq) probable 1-acyl-sn-glycerol-3-phosphate acyltransferase 5	[I]	Lipid transport and metabolism	Acyltransferase	Probable 1-acyl-sn-glycerol-3-phosphate acyltransferase 5 OS=Arabidopsis thaliana OX=3702 GN=LPAT5 PE=2 SV=1	1-acylglycerol-3-phosphate O-acyltransferase OS=Cinnamomum micranthum f. kanehirae OX=337451 GN=CKAN_02503400 PE=3 SV=1	I	Lipid transport and metabolism	putative 1-acyl-sn-glycerol-3-phosphate acyltransferase 5 [Cinnamomum micranthum f. kanehirae]
Phoebe_bournei_newGene_3660	--	--	Molecular Function: ADP binding (GO:0043531);;	--	--	--	--	--	Putative disease resistance protein RGA1 OS=Cinnamomum micranthum f. kanehirae OX=337451 GN=CKAN_00830800 PE=4 SV=1	T	Signal transduction mechanisms	putative disease resistance protein RGA1 [Cinnamomum micranthum f. kanehirae]
Phoebe_bournei_newGene_7637	--	--	Biological Process: response to water (GO:0009415);;	--	--	--	Dehydrin	--	--	--	--	--
Phoebe_bournei_newGene_4292	--	--	--	--	[K]	Transcription	Endonuclease/Exonuclease/phosphatase family	Carbon catabolite repressor protein 4 homolog 6 OS=Arabidopsis thaliana OX=3702 GN=CCR4-6 PE=2 SV=2	carbon catabolite repressor protein 4 homolog 5 isoform X4 OS=Nelumbo nucifera OX=4432 GN=LOC104595310 PE=4 SV=1	L	Replication, recombination and repair	PREDICTED: carbon catabolite repressor protein 4 homolog 5 isoform X4 [Nelumbo nucifera]
Phoebe_bournei_newGene_1243	[R]	General function prediction only	Cellular Component: nucleus (GO:0005634);; Cellular Component: chromosome (GO:0005694);; Molecular Function: zinc ion binding (GO:0008270);; Molecular Function: histone-lysine N-methyltransferase activity (GO:0018024);;	K11433|5.0e-88|cic:CICLE_v10020754mg|K11433 [histone H3]-lysine36 N-dimethyltransferase SETMAR [EC:2.1.1.357] | (RefSeq) hypothetical protein	[BK]	--	SET domain	Histone-lysine N-methyltransferase SUVR3 OS=Arabidopsis thaliana OX=3702 GN=SUVR3 PE=2 SV=4	SET domain-containing protein OS=Cinnamomum micranthum f. kanehirae OX=337451 GN=CKAN_00903400 PE=4 SV=1	--	--	SET domain-containing protein [Cinnamomum micranthum f. kanehirae]
Phoebe_bournei_newGene_11245	--	--	Cellular Component: integral component of membrane (GO:0016021);;	--	--	--	--	--	uncharacterized protein LOC109018724 OS=Juglans regia OX=51240 GN=LOC109018724 PE=4 SV=1	--	--	uncharacterized protein LOC109018724 [Juglans regia]
Phoebe_bournei_newGene_6760	--	--	Molecular Function: transaminase activity (GO:0008483);; Cellular Component: integral component of membrane (GO:0016021);; Molecular Function: carbon-sulfur lyase activity (GO:0016846);;	K14548|1.7e-115|mesc:110609029|K14548 U3 small nucleolar RNA-associated protein 4 | (RefSeq) LOW QUALITY PROTEIN: U3 small nucleolar RNA-associated protein 4 homolog	--	--	Allinase	Tryptophan aminotransferase-related protein 3 OS=Arabidopsis thaliana OX=3702 GN=TAR3 PE=3 SV=1	Tryptophan aminotransferase-related protein 4-like protein OS=Cinnamomum micranthum f. kanehirae OX=337451 GN=CKAN_00602500 PE=3 SV=1	S	Function unknown	tryptophan aminotransferase-related protein 4-like protein [Cinnamomum micranthum f. kanehirae]
Phoebe_bournei_newGene_3923	--	--	Cellular Component: integral component of membrane (GO:0016021);; Molecular Function: transmembrane transporter activity (GO:0022857);;	K14638|8.8e-33|lja:Lj1g3v4515850.1|K14638 solute carrier family 15 (peptide/histidine transporter), member 3/4 | (RefSeq) Lj1g3v4515850.1; -	[E]	Amino acid transport and metabolism	POT family	Protein NRT1/ PTR FAMILY 5.3 OS=Arabidopsis thaliana OX=3702 GN=NPF5.3 PE=2 SV=1	Protein NRT1/ PTR FAMILY 5.2-like protein OS=Cinnamomum micranthum f. kanehirae OX=337451 GN=CKAN_02596100 PE=3 SV=1	E	Amino acid transport and metabolism	protein NRT1/ PTR FAMILY 5.2-like protein [Cinnamomum micranthum f. kanehirae]
Phoebe_bournei_newGene_12952	--	--	Molecular Function: carbohydrate binding (GO:0030246);;	K03695|1.4e-23|aip:107635377|K03695 ATP-dependent Clp protease ATP-binding subunit ClpB | (RefSeq) chaperone protein ClpB3, chloroplastic	--	--	Jacalin-like lectin domain	Jacalin-related lectin 3 OS=Arabidopsis thaliana OX=3702 GN=JAL3 PE=2 SV=1	Jacalin-related lectin 3 isoform X1 OS=Cinnamomum micranthum f. kanehirae OX=337451 GN=CKAN_00215100 PE=4 SV=1	S	Function unknown	jacalin-related lectin 3 isoform X1 [Cinnamomum micranthum f. kanehirae]
Phoebe_bournei_newGene_600	--	--	--	--	--	--	--	--	F-box-like protein OS=Cinnamomum micranthum f. kanehirae OX=337451 GN=CKAN_02045100 PE=4 SV=1	S	Function unknown	F-box-like protein [Cinnamomum micranthum f. kanehirae]
Phoebe_bournei_newGene_657	--	--	--	--	--	--	--	--	Uncharacterized protein OS=Cinnamomum micranthum f. kanehirae OX=337451 GN=CKAN_01243400 PE=4 SV=1	--	--	hypothetical protein CKAN_01243400 [Cinnamomum micranthum f. kanehirae]
Phoebe_bournei_newGene_8691	[QR]	--	Molecular Function: oxidoreductase activity (GO:0016491);;	K08070|8.2e-143|thj:104805677|K08070 2-alkenal reductase [EC:1.3.1.74] | (RefSeq) 2-alkenal reductase (NADP(+)-dependent)	[R]	General function prediction only	N-terminal domain of oxidoreductase	2-alkenal reductase (NADP(+)-dependent) OS=Nicotiana tabacum OX=4097 GN=DBR PE=1 SV=1	2-alkenal reductase NADP+-dependent isoform X1 OS=Cinnamomum micranthum f. kanehirae OX=337451 GN=CKAN_02611500 PE=4 SV=1	--	--	2-alkenal reductase NADP+-dependent isoform X1 [Cinnamomum micranthum f. kanehirae]
Phoebe_bournei_newGene_3464	--	--	Cellular Component: integral component of membrane (GO:0016021);; Molecular Function: transmembrane transporter activity (GO:0022857);;	K14638|3.8e-86|pper:18788586|K14638 solute carrier family 15 (peptide/histidine transporter), member 3/4 | (RefSeq) protein NRT1/ PTR FAMILY 4.5	[E]	Amino acid transport and metabolism	POT family	Protein NRT1/ PTR FAMILY 8.3 OS=Arabidopsis thaliana OX=3702 GN=NPF8.3 PE=1 SV=1	Uncharacterized protein OS=Camellia sinensis var. sinensis OX=542762 GN=TEA_003653 PE=3 SV=1	E	Amino acid transport and metabolism	protein NRT1/ PTR FAMILY 4.5-like [Camellia sinensis]
Phoebe_bournei_newGene_3741	--	--	Cellular Component: integral component of membrane (GO:0016021);;	--	[S]	Function unknown	Keratinocyte-associated protein 2	--	Dolichyl-diphosphooligosaccharide--protein glycosyltransferase subunit KCP2 OS=Nelumbo nucifera OX=4432 GN=LOC104610270 PE=3 SV=1	S	Function unknown	PREDICTED: protein KRTCAP2 homolog isoform X1 [Nelumbo nucifera]
Phoebe_bournei_newGene_6618	--	--	Molecular Function: protein serine/threonine kinase activity (GO:0004674);; Cellular Component: plasma membrane (GO:0005886);; Biological Process: protein autophosphorylation (GO:0046777);;	--	--	--	Leucine Rich repeats (2 copies)	--	Non-specific serine/threonine protein kinase (Fragment) OS=Citrus sinensis OX=2711 GN=CISIN_1g045177mg PE=4 SV=1	T	Signal transduction mechanisms	hypothetical protein CICLE_v100189082mg, partial [Citrus clementina]
Phoebe_bournei_newGene_5337	--	--	--	--	--	--	TNP1/EN/SPM transposase	--	Putative transposase, Tnp1/En/Spm OS=Rosa chinensis OX=74649 GN=RchiOBHm_Chr5g0060161 PE=4 SV=1	--	--	uncharacterized protein LOC111401263 isoform X2 [Olea europaea var. sylvestris]
Phoebe_bournei_newGene_1481	[N]	Cell motility	Cellular Component: integral component of membrane (GO:0016021);; Molecular Function: cellulose synthase (UDP-forming) activity (GO:0016760);; Biological Process: cellulose biosynthetic process (GO:0030244);; Biological Process: cell wall organization (GO:0071555);;	K10999|5.6e-63|sot:102599079|K10999 cellulose synthase A [EC:2.4.1.12] | (RefSeq) probable cellulose synthase A catalytic subunit 3 [UDP-forming]	--	--	Cellulose synthase	Cellulose synthase-like protein G3 OS=Arabidopsis thaliana OX=3702 GN=CSLG3 PE=2 SV=2	Cellulose synthase-like protein G2 OS=Cinnamomum micranthum f. kanehirae OX=337451 GN=CKAN_01455500 PE=4 SV=1	G	Carbohydrate transport and metabolism	cellulose synthase-like protein G2 [Cinnamomum micranthum f. kanehirae]
Phoebe_bournei_newGene_355	--	--	Cellular Component: integral component of membrane (GO:0016021);;	--	[T]	Signal transduction mechanisms	Organic solute transporter Ostalpha	Protein LAZ1 homolog 1 OS=Arabidopsis thaliana OX=3702 GN=At1g77220 PE=2 SV=1	Uncharacterized protein OS=Vitis vinifera OX=29760 GN=VIT_00s0404g00020 PE=4 SV=1	T	Signal transduction mechanisms	hypothetical protein HS088_TW21G00800 [Tripterygium wilfordii]
Phoebe_bournei_newGene_5746	--	--	Cellular Component: nucleus (GO:0005634);; Biological Process: regulation of transcription, DNA-templated (GO:0006355);; Molecular Function: zinc ion binding (GO:0008270);;	K17604|2.7e-06|sita:101774527|K17604 zinc finger SWIM domain-containing protein 3 | (RefSeq) protein FAR1-RELATED SEQUENCE 5-like	--	--	--	--	Protein FAR1-RELATED SEQUENCE OS=Cinnamomum micranthum f. kanehirae OX=337451 GN=CKAN_00883000 PE=3 SV=1	S	Function unknown	protein FAR1-RELATED SEQUENCE 5-like protein [Cinnamomum micranthum f. kanehirae]
Phoebe_bournei_newGene_4977	[O]	Posttranslational modification, protein turnover, chaperones	Biological Process: protein folding (GO:0006457);; Molecular Function: unfolded protein binding (GO:0051082);;	K09510|9.2e-163|mesc:110602863|K09510 DnaJ homolog subfamily B member 4 | (RefSeq) dnaJ homolog subfamily B member 13-like	[O]	Posttranslational modification, protein turnover, chaperones	DnaJ C terminal domain	DnaJ protein homolog ANJ1 OS=Atriplex nummularia OX=3553 PE=2 SV=1	DnaJ protein 1 OS=Cinnamomum micranthum f. kanehirae OX=337451 GN=CKAN_01866600 PE=4 SV=1	O	Posttranslational modification, protein turnover, chaperones	dnaJ protein 1 [Cinnamomum micranthum f. kanehirae]
Phoebe_bournei_newGene_11092	--	--	--	--	--	--	--	--	Integral membrane protein hemolysin-III, putative isoform 1 OS=Cinnamomum micranthum f. kanehirae OX=337451 GN=CKAN_01338200 PE=4 SV=1	--	--	Integral membrane protein hemolysin-III, putative isoform 1 [Cinnamomum micranthum f. kanehirae]
Phoebe_bournei_newGene_10610	--	--	--	--	--	--	--	--	Albumin-2 protein OS=Cinnamomum micranthum f. kanehirae OX=337451 GN=CKAN_01345900 PE=4 SV=1	--	--	albumin-2 protein [Cinnamomum micranthum f. kanehirae]
Phoebe_bournei_newGene_4723	[GI]	--	Molecular Function: enzyme inhibitor activity (GO:0004857);; Molecular Function: pectinesterase activity (GO:0030599);; Biological Process: cell wall modification (GO:0042545);; Molecular Function: aspartyl esterase activity (GO:0045330);; Biological Process: pectin catabolic process (GO:0045490);;	K01051|1.3e-233|nnu:104609247|K01051 pectinesterase [EC:3.1.1.11] | (RefSeq) pectinesterase	--	--	Pectinesterase	Pectinesterase 1 OS=Citrus sinensis OX=2711 GN=PECS-1.1 PE=2 SV=1	Pectinesterase OS=Cinnamomum micranthum f. kanehirae OX=337451 GN=CKAN_02518000 PE=3 SV=1	G	Carbohydrate transport and metabolism	pectinesterase [Cinnamomum micranthum f. kanehirae]
Phoebe_bournei_newGene_12711	--	--	Cellular Component: cellular_component (GO:0005575);; Cellular Component: intracellular (GO:0005622);; Cellular Component: obsolete cell (GO:0005623);; Cellular Component: cytoplasm (GO:0005737);; Cellular Component: plasma membrane (GO:0005886);; Cellular Component: chloroplast (GO:0009507);; Cellular Component: plastid (GO:0009536);; Cellular Component: membrane (GO:0016020);; Cellular Componen…	--	--	--	--	Uncharacterized protein At5g41620 OS=Arabidopsis thaliana OX=3702 GN=At5g41620 PE=2 SV=2	Putative Plasma membrane OS=Cinnamomum micranthum f. kanehirae OX=337451 GN=CKAN_02588900 PE=4 SV=1	S	Function unknown	putative Plasma membrane [Cinnamomum micranthum f. kanehirae]
Phoebe_bournei_newGene_9644	--	--	Cellular Component: Set1C/COMPASS complex (GO:0048188);;	K14961|2.4e-237|nnu:104607600|K14961 COMPASS component SWD1 | (RefSeq) protein RBL	[R]	General function prediction only	WD domain, G-beta repeat	Protein RBL OS=Arabidopsis thaliana OX=3702 GN=RBL PE=1 SV=1	WD_REPEATS_REGION domain-containing protein OS=Cinnamomum micranthum f. kanehirae OX=337451 GN=CKAN_00652800 PE=4 SV=1	P	Inorganic ion transport and metabolism	hypothetical protein CKAN_00652800 [Cinnamomum micranthum f. kanehirae]
Phoebe_bournei_newGene_3304	[T]	Signal transduction mechanisms	Molecular Function: protein serine/threonine kinase activity (GO:0004674);; Molecular Function: ATP binding (GO:0005524);; Cellular Component: integral component of membrane (GO:0016021);;	K20181|8.4e-98|mtr:MTR_5g026090|K20181 vacuolar protein sorting-associated protein 18 | (RefSeq) vacuolar sorting-associated-like protein	--	--	Protein tyrosine and serine/threonine kinase	Putative receptor-like protein kinase At3g47110 OS=Arabidopsis thaliana OX=3702 GN=At3g47110 PE=3 SV=1	Protein kinase domain-containing protein OS=Cinnamomum micranthum f. kanehirae OX=337451 GN=CKAN_02033700 PE=3 SV=1	T	Signal transduction mechanisms	Protein kinase domain-containing protein [Cinnamomum micranthum f. kanehirae]
Phoebe_bournei_newGene_397	--	--	Biological Process: SRP-dependent cotranslational protein targeting to membrane (GO:0006614);; Molecular Function: 7S RNA binding (GO:0008312);; Cellular Component: signal recognition particle (GO:0048500);;	K03109|1.2e-46|egu:105033726|K03109 signal recognition particle subunit SRP9 | (RefSeq) signal recognition particle 9 kDa protein	[U]	Intracellular trafficking, secretion, and vesicular transport	Signal recognition particle 9 kDa protein (SRP9)	Signal recognition particle 9 kDa protein OS=Arabidopsis thaliana OX=3702 GN=SRP9 PE=3 SV=1	Signal recognition particle protein OS=Cinnamomum micranthum f. kanehirae OX=337451 GN=CKAN_01845900 PE=4 SV=1	J	Translation, ribosomal structure and biogenesis	signal recognition particle protein [Cinnamomum micranthum f. kanehirae]
Phoebe_bournei_newGene_1173	--	--	Molecular Function: kinase activity (GO:0016301);;	K14544|6.8e-81|csl:COCSUDRAFT_65874|K14544 U3 small nucleolar RNA-associated protein 22 | (RefSeq) hypothetical protein	[T]	Signal transduction mechanisms	Phosphatidylinositol 3- and 4-kinase	Phosphatidylinositol 4-kinase gamma 4 OS=Arabidopsis thaliana OX=3702 GN=PI4KG4 PE=1 SV=1	Phosphatidylinositol 3-/4-kinase OS=Cinnamomum micranthum f. kanehirae OX=337451 GN=CKAN_02696400 PE=4 SV=1	O	Posttranslational modification, protein turnover, chaperones	Phosphatidylinositol 3-/4-kinase [Cinnamomum micranthum f. kanehirae]
Phoebe_bournei_newGene_5131	--	--	--	--	--	--	--	--	Uncharacterized protein OS=Cinnamomum micranthum f. kanehirae OX=337451 GN=CKAN_01418400 PE=4 SV=1	--	--	hypothetical protein CKAN_01418400 [Cinnamomum micranthum f. kanehirae]
Phoebe_bournei_newGene_5462	--	--	Biological Process: intracellular protein transport (GO:0006886);;	K23222|1.1e-23|nsy:104242359|K23222 nuclease HARBI1 [EC:3.1.-.-] | (RefSeq) uncharacterized protein LOC104242359	--	--	--	--	Putative nuclease HARBI1 isoform X1 OS=Cinnamomum micranthum f. kanehirae OX=337451 GN=CKAN_01515400 PE=3 SV=1	L	Replication, recombination and repair	putative nuclease HARBI1 isoform X1 [Cinnamomum micranthum f. kanehirae]
Phoebe_bournei_newGene_2076	--	--	Biological Process: reproduction (GO:0000003);; Biological Process: negative regulation of transcription by RNA polymerase II (GO:0000122);; Biological Process: embryonic axis specification (GO:0000578);; Biological Process: cell morphogenesis (GO:0000902);; Biological Process: eye development (GO:0001654);; Biological Process: urogenital system development (GO:0001655);; Biological Process: embr…	--	[R]	General function prediction only	Leucine rich repeat	Plant intracellular Ras-group-related LRR protein 5 OS=Oryza sativa subsp. japonica OX=39947 GN=IRL5 PE=2 SV=1	Plant intracellular Ras-group-related LRR protein 5-like protein OS=Cinnamomum micranthum f. kanehirae OX=337451 GN=CKAN_01633300 PE=4 SV=1	S	Function unknown	plant intracellular Ras-group-related LRR protein 5-like protein [Cinnamomum micranthum f. kanehirae]
Phoebe_bournei_newGene_610	--	--	Molecular Function: 1-phosphatidylinositol binding (GO:0005545);; Cellular Component: clathrin-coated vesicle (GO:0030136);; Molecular Function: clathrin binding (GO:0030276);; Biological Process: clathrin coat assembly (GO:0048268);;	K20043|6.7e-21|atr:18435318|K20043 clathrin coat assembly protein AP180 | (RefSeq) putative clathrin assembly protein At5g35200	[TU]	--	--	Putative clathrin assembly protein At2g01600 OS=Arabidopsis thaliana OX=3702 GN=At2g01600 PE=2 SV=2	AP180 N-terminal ANTH domain-containing protein OS=Cinnamomum micranthum f. kanehirae OX=337451 GN=CKAN_02046300 PE=4 SV=1	--	--	AP180 N-terminal ANTH domain-containing protein [Cinnamomum micranthum f. kanehirae]
Phoebe_bournei_newGene_1227	--	--	--	--	--	--	--	--	Retrovirus-related Pol polyprotein from transposon TNT 1-94 OS=Cinnamomum micranthum f. kanehirae OX=337451 GN=CKAN_01185200 PE=4 SV=1	L	Replication, recombination and repair	Retrovirus-related Pol polyprotein from transposon TNT 1-94 [Cinnamomum micranthum f. kanehirae]
Phoebe_bournei_newGene_3888	--	--	Molecular Function: antiporter activity (GO:0015297);; Cellular Component: integral component of membrane (GO:0016021);; Molecular Function: xenobiotic transmembrane transporter activity (GO:0042910);;	K03327|3.4e-20|peq:110034017|K03327 multidrug resistance protein, MATE family | (RefSeq) protein DETOXIFICATION 14-like	[R]	General function prediction only	--	Protein DETOXIFICATION 14 OS=Arabidopsis thaliana OX=3702 GN=DTX14 PE=1 SV=1	Protein DETOXIFICATION OS=Cinnamomum micranthum f. kanehirae OX=337451 GN=CKAN_02319600 PE=3 SV=1	V	Defense mechanisms	Protein TRANSPARENT TESTA 12 [Cinnamomum micranthum f. kanehirae]
Phoebe_bournei_newGene_2811	--	--	--	--	--	--	Pentatricopeptide repeat domain	--	Uncharacterized protein OS=Eutrema salsugineum OX=72664 GN=EUTSA_v10004016mg PE=4 SV=1	S	Function unknown	hypothetical protein EUTSA_v10004016mg [Eutrema salsugineum]
Phoebe_bournei_newGene_11590	--	--	Molecular Function: protein serine/threonine phosphatase activity (GO:0004722);; Molecular Function: metal ion binding (GO:0046872);;	K01102|2.4e-146|nnu:104605034|K01102 pyruvate dehydrogenase phosphatase [EC:3.1.3.43] | (RefSeq) probable protein phosphatase 2C 42	[T]	Signal transduction mechanisms	Protein phosphatase 2C	Probable protein phosphatase 2C 42 OS=Arabidopsis thaliana OX=3702 GN=At3g17090 PE=1 SV=1	Protein-serine/threonine phosphatase OS=Cinnamomum micranthum f. kanehirae OX=337451 GN=CKAN_02361400 PE=3 SV=1	T	Signal transduction mechanisms	putative protein phosphatase 2C 42 [Cinnamomum micranthum f. kanehirae]
Phoebe_bournei_newGene_11712	--	--	--	--	--	--	--	--	Protein MAIN-LIKE 2-like protein OS=Cinnamomum micranthum f. kanehirae OX=337451 GN=CKAN_00617800 PE=4 SV=1	--	--	--
Phoebe_bournei_newGene_10604	--	--	Molecular Function: ubiquitin-protein transferase activity (GO:0004842);; Cellular Component: integral component of membrane (GO:0016021);;	--	--	--	--	--	RING-type E3 ubiquitin transferase OS=Cinnamomum micranthum f. kanehirae OX=337451 GN=CKAN_00944300 PE=4 SV=1	--	--	E3 ubiquitin-protein ligase PUB23-like protein [Cinnamomum micranthum f. kanehirae]
Phoebe_bournei_newGene_12552	--	--	Cellular Component: integral component of membrane (GO:0016021);;	K13466|4.6e-17|zju:107423984|K13466 EIX receptor 1/2 | (RefSeq) receptor-like protein EIX2	[R]	General function prediction only	Leucine rich repeat	Receptor-like protein 7 OS=Arabidopsis thaliana OX=3702 GN=RLP7 PE=3 SV=2	Receptor-like protein 12 OS=Cinnamomum micranthum f. kanehirae OX=337451 GN=CKAN_00746100 PE=4 SV=1	S	Function unknown	receptor-like protein 12 [Cinnamomum micranthum f. kanehirae]
Phoebe_bournei_newGene_9413	--	--	Molecular Function: DNA binding (GO:0003677);; Molecular Function: metal ion binding (GO:0046872);;	--	--	--	--	--	SANT/Myb domain-containing protein OS=Cinnamomum micranthum f. kanehirae OX=337451 GN=CKAN_02029700 PE=4 SV=1	S	Function unknown	SANT/Myb domain-containing protein [Cinnamomum micranthum f. kanehirae]
Phoebe_bournei_newGene_8965	--	--	--	--	--	--	--	--	Uncharacterized protein OS=Dorcoceras hygrometricum OX=472368 GN=F511_47514 PE=4 SV=1	--	--	hypothetical protein F511_47514 [Dorcoceras hygrometricum]
Phoebe_bournei_newGene_9142	--	--	Molecular Function: structural constituent of ribosome (GO:0003735);; Cellular Component: ribosome (GO:0005840);; Biological Process: translation (GO:0006412);;	--	--	--	Protein of unknown function (DUF632)	--	DUF632 domain-containing protein/DUF630 domain-containing protein OS=Cinnamomum micranthum f. kanehirae OX=337451 GN=CKAN_02067300 PE=4 SV=1	S	Function unknown	DUF632 domain-containing protein/DUF630 domain-containing protein [Cinnamomum micranthum f. kanehirae]
Phoebe_bournei_newGene_1561	--	--	Molecular Function: DNA binding (GO:0003677);;	K11111|1.4e-87|nnu:104600854|K11111 telomeric repeat-binding factor 2 | (RefSeq) uncharacterized LOC104600854	--	--	Myb-like DNA-binding domain	--	SANT/Myb domain-containing protein OS=Cinnamomum micranthum f. kanehirae OX=337451 GN=CKAN_00531700 PE=4 SV=1	K	Transcription	SANT/Myb domain-containing protein [Cinnamomum micranthum f. kanehirae]
Phoebe_bournei_newGene_9210	--	--	Molecular Function: lipid binding (GO:0008289);;	--	--	--	--	--	Pleckstrin domain-containing protein OS=Cinnamomum micranthum f. kanehirae OX=337451 GN=CKAN_02605300 PE=4 SV=1	T	Signal transduction mechanisms	Pleckstrin domain-containing protein [Cinnamomum micranthum f. kanehirae]
Phoebe_bournei_newGene_12927	--	--	--	--	--	--	Plant transposase (Ptta/En/Spm family)	--	--	--	--	--
Phoebe_bournei_newGene_5724	--	--	Molecular Function: DNA binding (GO:0003677);; Biological Process: DNA integration (GO:0015074);; Cellular Component: integral component of membrane (GO:0016021);; Molecular Function: protein dimerization activity (GO:0046983);;	K03283|9.5e-10|jre:108998998|K03283 heat shock 70kDa protein 1/2/6/8 | (RefSeq) heat shock cognate 70 kDa protein 2	[L]	Replication, recombination and repair	BED zinc finger	Zinc finger BED domain-containing protein RICESLEEPER 2 OS=Oryza sativa subsp. japonica OX=39947 GN=Os03g0733400 PE=2 SV=1	Uncharacterized protein OS=Fagus sylvatica OX=28930 GN=FSB_LOCUS3624 PE=4 SV=1	L	Replication, recombination and repair	zinc finger BED domain-containing protein RICESLEEPER 2-like [Quercus lobata]
Phoebe_bournei_newGene_3770	--	--	Molecular Function: hydrolase activity, hydrolyzing O-glycosyl compounds (GO:0004553);; Biological Process: carbohydrate metabolic process (GO:0005975);;	--	--	--	--	--	Cellulase OS=Cinnamomum micranthum f. kanehirae OX=337451 GN=CKAN_02421500 PE=3 SV=1	K	Transcription	ataxia telangiectasia mutated family protein [Cinnamomum micranthum f. kanehirae]
Phoebe_bournei_newGene_10588	--	--	Molecular Function: zinc ion binding (GO:0008270);;	K22733|4.2e-96|cit:102612526|K22733 magnesium transporter | (RefSeq) uncharacterized protein LOC102612526	[R]	General function prediction only	DYW family of nucleic acid deaminases	Pentatricopeptide repeat-containing protein At1g08070, chloroplastic OS=Arabidopsis thaliana OX=3702 GN=PCMP-H12 PE=2 SV=1	Pentatricopeptide repeat-containing protein, chloroplastic-like protein OS=Cinnamomum micranthum f. kanehirae OX=337451 GN=CKAN_01348900 PE=4 SV=1	S	Function unknown	pentatricopeptide repeat-containing protein, chloroplastic-like protein [Cinnamomum micranthum f. kanehirae]
Phoebe_bournei_newGene_7197	[G]	Carbohydrate transport and metabolism	Molecular Function: UDP-glycosyltransferase activity (GO:0008194);;	K11820|1.5e-168|jre:108993813|K11820 N-hydroxythioamide S-beta-glucosyltransferase [EC:2.4.1.195] | (RefSeq) UDP-glycosyltransferase 74B1	[GC]	--	UDP-glucoronosyl and UDP-glucosyl transferase	Flavonol 7-O-beta-glucosyltransferase UGT74F1 OS=Arabidopsis thaliana OX=3702 GN=UGT74F1 PE=1 SV=1	Glycosyltransferase OS=Cinnamomum micranthum f. kanehirae OX=337451 GN=CKAN_02614400 PE=3 SV=1	--	--	UDP-glycosyltransferase 74B5 [Cinnamomum micranthum f. kanehirae]
Phoebe_bournei_newGene_10284	--	--	Molecular Function: protein kinase activity (GO:0004672);; Molecular Function: ATP binding (GO:0005524);; Cellular Component: integral component of membrane (GO:0016021);; Molecular Function: carbohydrate binding (GO:0030246);; Biological Process: recognition of pollen (GO:0048544);;	K03327|1.5e-26|cic:CICLE_v10018703mg|K03327 multidrug resistance protein, MATE family | (RefSeq) hypothetical protein	--	--	D-mannose binding lectin	G-type lectin S-receptor-like serine/threonine-protein kinase At2g19130 OS=Arabidopsis thaliana OX=3702 GN=At2g19130 PE=2 SV=1	G-type lectin S-receptor-like serine/threonine-protein kinase OS=Cinnamomum micranthum f. kanehirae OX=337451 GN=CKAN_01710300 PE=4 SV=1	T	Signal transduction mechanisms	G-type lectin S-receptor-like serine/threonine-protein kinase [Cinnamomum micranthum f. kanehirae]
Phoebe_bournei_newGene_4618	--	--	Molecular Function: peptidyl-prolyl cis-trans isomerase activity (GO:0003755);;	K09571|3.2e-14|cqi:110687804|K09571 FK506-binding protein 4/5 [EC:5.2.1.8] | (RefSeq) peptidyl-prolyl cis-trans isomerase FKBP62-like	[O]	Posttranslational modification, protein turnover, chaperones	Associated with HOX	Peptidyl-prolyl cis-trans isomerase FKBP65 OS=Arabidopsis thaliana OX=3702 GN=FKBP65 PE=1 SV=1	Peptidylprolyl isomerase OS=Cinnamomum micranthum f. kanehirae OX=337451 GN=CKAN_00297200 PE=4 SV=1	O	Posttranslational modification, protein turnover, chaperones	peptidyl-prolyl isomerase-like protein [Cinnamomum micranthum f. kanehirae]
Phoebe_bournei_newGene_7203	[M]	Cell wall/membrane/envelope biogenesis	Molecular Function: protein kinase activity (GO:0004672);; Molecular Function: ATP binding (GO:0005524);;	K13415|5.3e-56|cam:101496225|K13415 protein brassinosteroid insensitive 1 [EC:2.7.10.1 2.7.11.1] | (RefSeq) brassinosteroid LRR receptor kinase	--	--	Protein tyrosine and serine/threonine kinase	Probably inactive leucine-rich repeat receptor-like protein kinase At5g48380 OS=Arabidopsis thaliana OX=3702 GN=At5g48380 PE=1 SV=1	Putative inactive leucine-rich repeat receptor-like protein kinase OS=Cinnamomum micranthum f. kanehirae OX=337451 GN=CKAN_02613200 PE=4 SV=1	T	Signal transduction mechanisms	putative inactive leucine-rich repeat receptor-like protein kinase [Cinnamomum micranthum f. kanehirae]
Phoebe_bournei_newGene_2426	--	--	Molecular Function: ligand-gated ion channel activity (GO:0015276);; Cellular Component: integral component of membrane (GO:0016021);;	K05387|9.2e-22|aof:109840486|K05387 glutamate receptor, ionotropic, plant | (RefSeq) glutamate receptor 2.7-like	[PET]	--	Bacterial extracellular solute-binding proteins, family 3	Glutamate receptor 2.2 OS=Arabidopsis thaliana OX=3702 GN=GLR2.2 PE=2 SV=1	Ionotropic glutamate receptor OS=Cinnamomum micranthum f. kanehirae OX=337451 GN=CKAN_02052200 PE=4 SV=1	--	--	Ionotropic glutamate receptor [Cinnamomum micranthum f. kanehirae]
Phoebe_bournei_newGene_3314	--	--	Molecular Function: zinc ion binding (GO:0008270);;	--	--	--	MULE transposase domain	--	Mutator-like protein transposase OS=Cinnamomum micranthum f. kanehirae OX=337451 GN=CKAN_02036000 PE=4 SV=1	--	--	Mutator-like protein transposase [Cinnamomum micranthum f. kanehirae]
Phoebe_bournei_newGene_11703	[E]	Amino acid transport and metabolism	Molecular Function: serine-type carboxypeptidase activity (GO:0004185);;	K09645|3.9e-180|nnu:104609936|K09645 vitellogenic carboxypeptidase-like protein [EC:3.4.16.-] | (RefSeq) serine carboxypeptidase-like 50	[OE]	--	Serine carboxypeptidase	Serine carboxypeptidase-like 50 OS=Arabidopsis thaliana OX=3702 GN=SCPL50 PE=2 SV=1	Carboxypeptidase OS=Cinnamomum micranthum f. kanehirae OX=337451 GN=CKAN_01812800 PE=3 SV=1	O	Posttranslational modification, protein turnover, chaperones	Peptidase S10 [Cinnamomum micranthum f. kanehirae]
Phoebe_bournei_newGene_13296	[QV]	--	Molecular Function: monooxygenase activity (GO:0004497);; Molecular Function: iron ion binding (GO:0005506);; Cellular Component: integral component of membrane (GO:0016021);; Molecular Function: oxidoreductase activity, acting on paired donors, with incorporation or reduction of molecular oxygen (GO:0016705);; Molecular Function: heme binding (GO:0020037);;	K13260|3.8e-160|mdm:103432708|K13260 isoflavone/4'-methoxyisoflavone 2'-hydroxylase [EC:1.14.14.90 1.14.14.89] | (RefSeq) cytochrome P450 81E8-like	[Q]	Secondary metabolites biosynthesis, transport and catabolism	Cytochrome P450	Cytochrome P450 81Q32 OS=Catharanthus roseus OX=4058 GN=CYP81Q32 PE=2 SV=1	Isoflavone 2'-hydroxylase-like protein OS=Cinnamomum micranthum f. kanehirae OX=337451 GN=CKAN_01170700 PE=3 SV=1	Q	Secondary metabolites biosynthesis, transport and catabolism	isoflavone 2'-hydroxylase-like protein [Cinnamomum micranthum f. kanehirae]
Phoebe_bournei_newGene_798	[J]	Translation, ribosomal structure and biogenesis	Cellular Component: exosome (RNase complex) (GO:0000178);; Biological Process: RNA processing (GO:0006396);;	K03678|2.1e-145|vvi:100265860|K03678 exosome complex component RRP45 | (RefSeq) exosome complex component RRP45A	[J]	Translation, ribosomal structure and biogenesis	3' exoribonuclease family, domain 1	Exosome complex component RRP45B OS=Arabidopsis thaliana OX=3702 GN=RRP45B PE=2 SV=1	Exosome complex component RRP45A isoform X1 OS=Cinnamomum micranthum f. kanehirae OX=337451 GN=CKAN_00829500 PE=3 SV=1	J	Translation, ribosomal structure and biogenesis	exosome complex component RRP45A isoform X1 [Cinnamomum micranthum f. kanehirae]
Phoebe_bournei_newGene_1351	[M]	Cell wall/membrane/envelope biogenesis	Biological Process: GPI anchor biosynthetic process (GO:0006506);; Cellular Component: integral component of membrane (GO:0016021);; Molecular Function: transferase activity, transferring glycosyl groups (GO:0016757);;	K03857|6.9e-186|nnu:104594212|K03857 phosphatidylinositol N-acetylglucosaminyltransferase subunit A [EC:2.4.1.198] | (RefSeq) phosphatidylinositol N-acetylglucosaminyltransferase subunit A	[MOI]	--	PIGA (GPI anchor biosynthesis)	Phosphatidylinositol N-acetylglucosaminyltransferase subunit A OS=Arabidopsis thaliana OX=3702 GN=PIGA PE=2 SV=1	GlcNAc-PI synthesis protein OS=Nelumbo nucifera OX=4432 GN=LOC104594212 PE=4 SV=1	--	--	PREDICTED: phosphatidylinositol N-acetylglucosaminyltransferase subunit A [Nelumbo nucifera]
Phoebe_bournei_newGene_11611	--	--	--	--	--	--	--	--	Putative pathogenesis-related protein isoform X1 OS=Cinnamomum micranthum f. kanehirae OX=337451 GN=CKAN_02358700 PE=4 SV=1	--	--	putative pathogenesis-related protein isoform X1 [Cinnamomum micranthum f. kanehirae]
Phoebe_bournei_newGene_9947	[M]	Cell wall/membrane/envelope biogenesis	Molecular Function: protein kinase activity (GO:0004672);; Molecular Function: ATP binding (GO:0005524);; Cellular Component: integral component of membrane (GO:0016021);;	K13415|6.9e-97|han:110929858|K13415 protein brassinosteroid insensitive 1 [EC:2.7.10.1 2.7.11.1] | (RefSeq) systemin receptor SR160-like	--	--	Protein tyrosine and serine/threonine kinase	MDIS1-interacting receptor like kinase 2 OS=Arabidopsis thaliana OX=3702 GN=MIK2 PE=1 SV=3	MDIS1-interacting receptor like kinase 2-like protein OS=Cinnamomum micranthum f. kanehirae OX=337451 GN=CKAN_02598400 PE=4 SV=1	T	Signal transduction mechanisms	MDIS1-interacting receptor like kinase 2-like protein [Cinnamomum micranthum f. kanehirae]
Phoebe_bournei_newGene_11722	--	--	Molecular Function: zinc ion binding (GO:0008270);;	--	[R]	General function prediction only	--	Pentatricopeptide repeat-containing protein At5g43790 OS=Arabidopsis thaliana OX=3702 GN=PCMP-E30 PE=2 SV=1	Pentatricopeptide repeat-containing-like protein OS=Cinnamomum micranthum f. kanehirae OX=337451 GN=CKAN_01813600 PE=4 SV=1	S	Function unknown	pentatricopeptide repeat-containing-like protein [Cinnamomum micranthum f. kanehirae]
Phoebe_bournei_newGene_13072	--	--	Molecular Function: molecular_function (GO:0003674);; Molecular Function: binding (GO:0005488);; Molecular Function: protein binding (GO:0005515);; Cellular Component: cellular_component (GO:0005575);; Cellular Component: intracellular (GO:0005622);; Cellular Component: obsolete cell (GO:0005623);; Cellular Component: cytoplasm (GO:0005737);; Biological Process: movement of cell or subcellular co…	K23538|8.3e-129|egu:105061345|K23538 ELMO domain-containing protein | (RefSeq) ELMO domain-containing protein C isoform X1	[S]	Function unknown	ELMO/CED-12 family	--	ELMO domain-containing protein C isoform X1 OS=Cinnamomum micranthum f. kanehirae OX=337451 GN=CKAN_00324000 PE=4 SV=1	S	Function unknown	ELMO domain-containing protein C isoform X1 [Cinnamomum micranthum f. kanehirae]
Phoebe_bournei_newGene_9406	--	--	Molecular Function: cysteine-type peptidase activity (GO:0008234);;	K14400|1.3e-35|qsu:111982967|K14400 pre-mRNA cleavage complex 2 protein Pcf11 | (RefSeq) LOW QUALITY PROTEIN: uncharacterized protein LOC111982967	--	--	Plant mobile domain	Protein MAIN-LIKE 2 OS=Arabidopsis thaliana OX=3702 GN=At2g04865 PE=1 SV=1	Serine/threonine-protein phosphatase 7 long form OS=Cinnamomum micranthum f. kanehirae OX=337451 GN=CKAN_00553200 PE=3 SV=1	S	Function unknown	serine/threonine-protein phosphatase 7 long form [Cinnamomum micranthum f. kanehirae]
Phoebe_bournei_newGene_2629	--	--	Cellular Component: integral component of membrane (GO:0016021);;	K10581|3.1e-224|egu:105047412|K10581 ubiquitin-conjugating enzyme E2 O [EC:2.3.2.24] | (RefSeq) uncharacterized protein LOC105047412	--	--	Protein of unknown function (DUF2921)	--	Uncharacterized protein OS=Cinnamomum micranthum f. kanehirae OX=337451 GN=CKAN_01819300 PE=4 SV=1	O	Posttranslational modification, protein turnover, chaperones	hypothetical protein CKAN_01819300 [Cinnamomum micranthum f. kanehirae]
Phoebe_bournei_newGene_7840	--	--	Biological Process: defense response (GO:0006952);; Molecular Function: ADP binding (GO:0043531);;	K13457|7.7e-110|mtr:MTR_3g055870|K13457 disease resistance protein RPM1 | (RefSeq) LRR and NB-ARC domain disease resistance protein	[T]	Signal transduction mechanisms	NB-ARC domain	Putative disease resistance RPP13-like protein 3 OS=Arabidopsis thaliana OX=3702 GN=RPP13L3 PE=3 SV=1	Putative disease resistance protein OS=Cinnamomum micranthum f. kanehirae OX=337451 GN=CKAN_00539400 PE=4 SV=1	T	Signal transduction mechanisms	putative disease resistance protein [Cinnamomum micranthum f. kanehirae]
Phoebe_bournei_newGene_4227	[V]	Defense mechanisms	Molecular Function: ATP binding (GO:0005524);; Cellular Component: integral component of membrane (GO:0016021);; Molecular Function: ATPase activity (GO:0016887);; Molecular Function: ATPase-coupled transmembrane transporter activity (GO:0042626);;	K05658|0.0e+00|nnu:104597187|K05658 ATP-binding cassette, subfamily B (MDR/TAP), member 1 [EC:7.6.2.2] | (RefSeq) ABC transporter B family member 19	[Q]	Secondary metabolites biosynthesis, transport and catabolism	ABC transporter transmembrane region	ABC transporter B family member 19 OS=Arabidopsis thaliana OX=3702 GN=ABCB19 PE=1 SV=1	ABC transporter B family member 19 OS=Cinnamomum micranthum f. kanehirae OX=337451 GN=CKAN_02232600 PE=4 SV=1	Q	Secondary metabolites biosynthesis, transport and catabolism	ABC transporter B family member 19 [Cinnamomum micranthum f. kanehirae]
Phoebe_bournei_newGene_8573	--	--	Cellular Component: integral component of membrane (GO:0016021);;	--	[DKT]	--	LEM3 (ligand-effect modulator 3) family / CDC50 family	ALA-interacting subunit 3 OS=Arabidopsis thaliana OX=3702 GN=ALIS3 PE=1 SV=1	ALA-interacting subunit OS=Cinnamomum micranthum f. kanehirae OX=337451 GN=CKAN_01749800 PE=3 SV=1	--	--	ALA-interacting subunit 3-like protein [Cinnamomum micranthum f. kanehirae]
Phoebe_bournei_newGene_11924	[L]	Replication, recombination and repair	Molecular Function: nucleic acid binding (GO:0003676);; Molecular Function: helicase activity (GO:0004386);; Molecular Function: ATP binding (GO:0005524);;	K12812|2.7e-97|psom:113295025|K12812 ATP-dependent RNA helicase UAP56/SUB2 [EC:3.6.4.13] | (RefSeq) DEAD-box ATP-dependent RNA helicase 56-like	[A]	RNA processing and modification	Helicase conserved C-terminal domain	DEAD-box ATP-dependent RNA helicase 15 OS=Arabidopsis thaliana OX=3702 GN=RH15 PE=1 SV=3	DEAD-box ATP-dependent RNA helicase 56-like protein OS=Cinnamomum micranthum f. kanehirae OX=337451 GN=CKAN_00077100 PE=4 SV=1	A	RNA processing and modification	DEAD-box ATP-dependent RNA helicase 56-like protein [Cinnamomum micranthum f. kanehirae]
Phoebe_bournei_newGene_8186	--	--	Molecular Function: DNA binding (GO:0003677);;	--	--	--	Myb-like DNA-binding domain	--	SANT/Myb domain-containing protein OS=Cinnamomum micranthum f. kanehirae OX=337451 GN=CKAN_00243400 PE=4 SV=1	K	Transcription	SANT/Myb domain-containing protein [Cinnamomum micranthum f. kanehirae]
Phoebe_bournei_newGene_5968	--	--	--	--	--	--	--	Pavine N-methyltransferase OS=Thalictrum flavum subsp. glaucum OX=150095 PE=1 SV=1	Mycolic acid cyclopropane synthase OS=Cinnamomum micranthum f. kanehirae OX=337451 GN=CKAN_00919700 PE=4 SV=1	--	--	Mycolic acid cyclopropane synthase [Cinnamomum micranthum f. kanehirae]
Phoebe_bournei_newGene_10795	--	--	Biological Process: defense response (GO:0006952);; Molecular Function: ADP binding (GO:0043531);;	--	--	--	--	--	WD-40 repeat-containing protein MSI4-like protein OS=Cinnamomum micranthum f. kanehirae OX=337451 GN=CKAN_00080900 PE=4 SV=1	T	Signal transduction mechanisms	WD-40 repeat-containing protein MSI4-like protein [Cinnamomum micranthum f. kanehirae]
Phoebe_bournei_newGene_7781	--	--	Molecular Function: zinc ion binding (GO:0008270);; Cellular Component: integral component of membrane (GO:0016021);;	--	--	--	GRF zinc finger	--	GRF-type domain-containing protein OS=Cinnamomum micranthum f. kanehirae OX=337451 GN=CKAN_00521900 PE=4 SV=1	--	--	hypothetical protein CKAN_00521900 [Cinnamomum micranthum f. kanehirae]
Phoebe_bournei_newGene_2239	--	--	Molecular Function: protein kinase activity (GO:0004672);; Molecular Function: ATP binding (GO:0005524);; Cellular Component: integral component of membrane (GO:0016021);;	K13420|1.6e-10|mus:103988543|K13420 LRR receptor-like serine/threonine-protein kinase FLS2 [EC:2.7.11.1] | (RefSeq) LRR receptor-like serine/threonine-protein kinase FLS2	--	--	--	LRR receptor-like serine/threonine-protein kinase FLS2 OS=Oryza sativa subsp. japonica OX=39947 GN=FLS2 PE=1 SV=1	LRR receptor-like serine/threonine-protein kinase FLS2 OS=Cinnamomum micranthum f. kanehirae OX=337451 GN=CKAN_01466900 PE=4 SV=1	T	Signal transduction mechanisms	LRR receptor-like serine/threonine-protein kinase FLS2 [Cinnamomum micranthum f. kanehirae]
Phoebe_bournei_newGene_6530	[J]	Translation, ribosomal structure and biogenesis	Molecular Function: glutamate-tRNA ligase activity (GO:0004818);; Molecular Function: ATP binding (GO:0005524);; Cellular Component: cytoplasm (GO:0005737);; Biological Process: glutamyl-tRNA aminoacylation (GO:0006424);;	K01885|1.3e-65|nnu:104596688|K01885 glutamyl-tRNA synthetase [EC:6.1.1.17] | (RefSeq) glutamate--tRNA ligase, cytoplasmic	[J]	Translation, ribosomal structure and biogenesis	tRNA synthetases class I (E and Q), catalytic domain	Glutamate--tRNA ligase, cytoplasmic OS=Arabidopsis thaliana OX=3702 GN=At5g26710 PE=1 SV=1	Glutamyl-tRNA synthetase OS=Cinnamomum micranthum f. kanehirae OX=337451 GN=CKAN_02429000 PE=3 SV=1	J	Translation, ribosomal structure and biogenesis	glutamate--tRNA ligase, cytoplasmic [Cinnamomum micranthum f. kanehirae]
Phoebe_bournei_newGene_13314	[R]	General function prediction only	Cellular Component: nucleus (GO:0005634);; Molecular Function: histone-lysine N-methyltransferase activity (GO:0018024);;	K23700|6.8e-40|qsu:112037919|K23700 [histone H3]-lysine36 N-trimethyltransferase [EC:2.1.1.359] | (RefSeq) histone-lysine N-methyltransferase, H3 lysine-36 specific-like	[U]	Intracellular trafficking, secretion, and vesicular transport	SET domain	Histone-lysine N-methyltransferase ASHH1 OS=Arabidopsis thaliana OX=3702 GN=ASHH1 PE=1 SV=1	Uncharacterized protein OS=Acer yangbiense OX=1000413 GN=EZV62_022435 PE=4 SV=1	U	Intracellular trafficking, secretion, and vesicular transport	hypothetical protein EZV62_022435 [Acer yangbiense]
Phoebe_bournei_newGene_776	--	--	Biological Process: defense response (GO:0006952);; Cellular Component: integral component of membrane (GO:0016021);;	--	--	--	--	--	L10-interacting MYB domain-containing-like protein OS=Cinnamomum micranthum f. kanehirae OX=337451 GN=CKAN_02215300 PE=3 SV=1	--	--	L10-interacting MYB domain-containing-like protein [Cinnamomum micranthum f. kanehirae]
Phoebe_bournei_newGene_9737	--	--	--	--	--	--	Domain of unknown function (DUF4283)	--	Transcription factor UPBEAT1 OS=Cinnamomum micranthum f. kanehirae OX=337451 GN=CKAN_02362100 PE=4 SV=1	--	--	transcription factor UPBEAT1 [Cinnamomum micranthum f. kanehirae]
Phoebe_bournei_newGene_2295	[K]	Transcription	--	K09539|4.1e-51|pxb:103966647|K09539 DnaJ homolog subfamily C member 19 | (RefSeq) mitochondrial import inner membrane translocase subunit TIM14-1 isoform X3	[O]	Posttranslational modification, protein turnover, chaperones	--	Mitochondrial import inner membrane translocase subunit TIM14-1 OS=Arabidopsis thaliana OX=3702 GN=TIM14-1 PE=1 SV=1	Mitochondrial import inner membrane translocase subunit TIM14-1 isoform X3 OS=Cinnamomum micranthum f. kanehirae OX=337451 GN=CKAN_01476700 PE=4 SV=1	O	Posttranslational modification, protein turnover, chaperones	mitochondrial import inner membrane translocase subunit TIM14-1 isoform X3 [Cinnamomum micranthum f. kanehirae]
Phoebe_bournei_newGene_10858	--	--	--	--	--	--	Domain of unknown function (DUF4216)	--	Transposon, En/Spm-like protein OS=Cinnamomum micranthum f. kanehirae OX=337451 GN=CKAN_02743400 PE=4 SV=1	S	Function unknown	Transposon, En/Spm-like protein [Cinnamomum micranthum f. kanehirae]
Phoebe_bournei_newGene_1684	--	--	Cellular Component: integral component of membrane (GO:0016021);;	--	--	--	PPR repeat family	--	Uncharacterized protein OS=Cinnamomum micranthum f. kanehirae OX=337451 GN=CKAN_01608200 PE=4 SV=1	S	Function unknown	hypothetical protein CKAN_01608200 [Cinnamomum micranthum f. kanehirae]
Phoebe_bournei_newGene_13241	--	--	--	--	--	--	--	--	Uncharacterized protein OS=Daucus carota subsp. sativus OX=79200 GN=DCAR_011678 PE=4 SV=1	--	--	PREDICTED: uncharacterized protein LOC108217033 [Daucus carota subsp. sativus]
Phoebe_bournei_newGene_1515	--	--	Molecular Function: hydrolase activity (GO:0016787);; Biological Process: phosphatidylinositol dephosphorylation (GO:0046856);;	K24221|2.4e-89|vra:106768887|K24221 type I inositol polyphosphate 5-phosphatase IP5P1/2 [EC:3.1.3.56] | (RefSeq) type I inositol polyphosphate 5-phosphatase 2 isoform X1	[U]	Intracellular trafficking, secretion, and vesicular transport	Endonuclease/Exonuclease/phosphatase family	Type I inositol polyphosphate 5-phosphatase 5 OS=Arabidopsis thaliana OX=3702 GN=IP5P5 PE=2 SV=1	Inositol polyphosphate-related phosphatase OS=Cinnamomum micranthum f. kanehirae OX=337451 GN=CKAN_00422800 PE=3 SV=1	T	Signal transduction mechanisms	Inositol polyphosphate-related phosphatase [Cinnamomum micranthum f. kanehirae]
Phoebe_bournei_newGene_9896	--	--	Cellular Component: integral component of membrane (GO:0016021);;	--	--	--	--	Tetraspanin-19 OS=Arabidopsis thaliana OX=3702 GN=TOM2AH3 PE=2 SV=1	Tetraspanin-19-like protein OS=Cinnamomum micranthum f. kanehirae OX=337451 GN=CKAN_00035000 PE=4 SV=1	--	--	tetraspanin-19-like protein [Cinnamomum micranthum f. kanehirae]
Phoebe_bournei_newGene_6041	[L]	Replication, recombination and repair	Molecular Function: nuclease activity (GO:0004518);; Biological Process: DNA repair (GO:0006281);; Molecular Function: metal ion binding (GO:0046872);; Molecular Function: class I DNA-(apurinic or apyrimidinic site) endonuclease activity (GO:0140078);;	K01142|3.3e-14|ota:OT_ostta18g00830|K01142 exodeoxyribonuclease III [EC:3.1.11.2] | (RefSeq) Exodeoxyribonuclease III xth	[L]	Replication, recombination and repair	Endonuclease/Exonuclease/phosphatase family	DNA-(apurinic or apyrimidinic site) endonuclease OS=Arabidopsis thaliana OX=3702 GN=APE1L PE=1 SV=1	DNA-(apurinic or apyrimidinic site) endonuclease OS=Cinnamomum micranthum f. kanehirae OX=337451 GN=CKAN_01250500 PE=3 SV=1	L	Replication, recombination and repair	DNA-apurinic or apyrimidinic site lyase isoform X1 [Cinnamomum micranthum f. kanehirae]
Phoebe_bournei_newGene_11704	[E]	Amino acid transport and metabolism	Molecular Function: serine-type carboxypeptidase activity (GO:0004185);;	K09645|6.0e-183|nnu:104609936|K09645 vitellogenic carboxypeptidase-like protein [EC:3.4.16.-] | (RefSeq) serine carboxypeptidase-like 50	[OE]	--	Serine carboxypeptidase	Serine carboxypeptidase-like 50 OS=Arabidopsis thaliana OX=3702 GN=SCPL50 PE=2 SV=1	Carboxypeptidase OS=Cinnamomum micranthum f. kanehirae OX=337451 GN=CKAN_01812600 PE=3 SV=1	O	Posttranslational modification, protein turnover, chaperones	Peptidase S10 [Cinnamomum micranthum f. kanehirae]
Phoebe_bournei_newGene_4891	[T]	Signal transduction mechanisms	Molecular Function: protein kinase activity (GO:0004672);; Molecular Function: ATP binding (GO:0005524);; Cellular Component: integral component of membrane (GO:0016021);;	K13415|5.5e-71|han:110929858|K13415 protein brassinosteroid insensitive 1 [EC:2.7.10.1 2.7.11.1] | (RefSeq) systemin receptor SR160-like	--	--	Protein kinase domain	MDIS1-interacting receptor like kinase 2 OS=Arabidopsis thaliana OX=3702 GN=MIK2 PE=1 SV=3	MDIS1-interacting receptor like kinase 2-like protein OS=Cinnamomum micranthum f. kanehirae OX=337451 GN=CKAN_02595900 PE=4 SV=1	T	Signal transduction mechanisms	LOW QUALITY PROTEIN: MDIS1-interacting receptor like kinase 2-like protein [Cinnamomum micranthum f. kanehirae]
Phoebe_bournei_newGene_8408	--	--	Cellular Component: extracellular region (GO:0005576);; Cellular Component: cell wall (GO:0005618);; Molecular Function: hydrolase activity (GO:0016787);; Biological Process: cell wall organization (GO:0071555);;	K01280|5.1e-42|spen:107013676|K01280 tripeptidyl-peptidase II [EC:3.4.14.10] | (RefSeq) tripeptidyl-peptidase 2-like isoform X1	[M]	Cell wall/membrane/envelope biogenesis	Pectinacetylesterase	Pectin acetylesterase 9 OS=Arabidopsis thaliana OX=3702 GN=PAE9 PE=2 SV=1	Pectin acetylesterase OS=Cinnamomum micranthum f. kanehirae OX=337451 GN=CKAN_02093200 PE=3 SV=1	M	Cell wall/membrane/envelope biogenesis	pectin acetylesterase 9 isoform X1 [Cinnamomum micranthum f. kanehirae]
Phoebe_bournei_newGene_12421	[J]	Translation, ribosomal structure and biogenesis	Molecular Function: structural constituent of ribosome (GO:0003735);; Cellular Component: ribosome (GO:0005840);; Biological Process: translation (GO:0006412);;	K02949|4.4e-83|var:108334088|K02949 small subunit ribosomal protein S11e | (RefSeq) 40S ribosomal protein S11-like	[J]	Translation, ribosomal structure and biogenesis	Ribosomal_S17 N-terminal	40S ribosomal protein S11 OS=Euphorbia esula OX=3993 GN=RPS11 PE=2 SV=1	40S ribosomal protein S11 OS=Cinnamomum micranthum f. kanehirae OX=337451 GN=CKAN_00641700 PE=3 SV=1	J	Translation, ribosomal structure and biogenesis	40S ribosomal protein S11 [Cinnamomum micranthum f. kanehirae]
Phoebe_bournei_newGene_9517	--	--	Molecular Function: protein serine/threonine kinase activity (GO:0004674);; Molecular Function: ATP binding (GO:0005524);; Cellular Component: integral component of membrane (GO:0016021);; Molecular Function: carbohydrate binding (GO:0030246);; Biological Process: recognition of pollen (GO:0048544);;	--	--	--	--	Receptor-like serine/threonine-protein kinase SD1-6 OS=Arabidopsis thaliana OX=3702 GN=SD16 PE=1 SV=2	Receptor-like serine/threonine-protein kinase OS=Cinnamomum micranthum f. kanehirae OX=337451 GN=CKAN_01717800 PE=3 SV=1	--	--	G-type lectin S-receptor-like serine/threonine-protein kinase isoform X1 [Cinnamomum micranthum f. kanehirae]
Phoebe_bournei_newGene_9064	--	--	--	--	--	--	--	--	Uncharacterized protein OS=Acer yangbiense OX=1000413 GN=EZV62_027951 PE=4 SV=1	S	Function unknown	hypothetical protein EZV62_027951 [Acer yangbiense]
Phoebe_bournei_newGene_4129	--	--	--	--	--	--	--	--	Uncharacterized protein (Fragment) OS=Medicago truncatula OX=3880 PE=2 SV=1	--	--	--
Phoebe_bournei_newGene_13152	--	--	--	K23222|1.7e-06|oeu:111367135|K23222 nuclease HARBI1 [EC:3.1.-.-] | (RefSeq) uncharacterized protein LOC111367135 isoform X1	[L]	Replication, recombination and repair	--	--	Putative nuclease HARBI1 OS=Cinnamomum micranthum f. kanehirae OX=337451 GN=CKAN_01220400 PE=3 SV=1	L	Replication, recombination and repair	putative nuclease HARBI1 [Cinnamomum micranthum f. kanehirae]
Phoebe_bournei_newGene_11698	--	--	--	--	--	--	--	--	Fasciclin-like arabinogalactan protein 4 OS=Cinnamomum micranthum f. kanehirae OX=337451 GN=CKAN_01496000 PE=3 SV=1	--	--	fasciclin-like arabinogalactan protein 4 [Cinnamomum micranthum f. kanehirae]
Phoebe_bournei_newGene_7089	--	--	--	K05657|2.3e-06|aof:109838094|K05657 ATP-binding cassette, subfamily B (MDR/TAP), member 10 | (RefSeq) ABC transporter B family member 28	--	--	--	ABC transporter B family member 28 OS=Arabidopsis thaliana OX=3702 GN=ABCB28 PE=2 SV=1	--	--	--	--
Phoebe_bournei_newGene_10712	[H]	Coenzyme transport and metabolism	Molecular Function: hydrolase activity (GO:0016787);;	K07025|9.2e-116|nnu:104601051|K07025 putative hydrolase of the HAD superfamily | (RefSeq) uncharacterized LOC104601051	[R]	General function prediction only	Haloacid dehalogenase-like hydrolase	--	Ripening-related-like protein OS=Cinnamomum micranthum f. kanehirae OX=337451 GN=CKAN_02475200 PE=4 SV=1	S	Function unknown	ripening-related-like protein [Cinnamomum micranthum f. kanehirae]
Phoebe_bournei_newGene_10952	--	--	Cellular Component: DNA-directed RNA polymerase complex (GO:0000428);; Molecular Function: obsolete transcription factor activity, protein binding (GO:0000988);; Molecular Function: obsolete transcription factor activity, transcription factor binding (GO:0000989);; Molecular Function: obsolete transcription factor activity, RNA polymerase II transcription factor binding (GO:0001076);; Molecular F…	K03125|0.0e+00|nnu:104586096|K03125 transcription initiation factor TFIID subunit 1 [EC:2.3.1.48 2.7.11.1] | (RefSeq) transcription initiation factor TFIID subunit 1	[K]	Transcription	Protein of unknown function (DUF3591)	Transcription initiation factor TFIID subunit 1 OS=Oryza sativa subsp. japonica OX=39947 GN=TAF1 PE=2 SV=1	Ubiquitin domain-containing protein OS=Cinnamomum micranthum f. kanehirae OX=337451 GN=CKAN_00432600 PE=3 SV=1	K	Transcription	Ubiquitin domain-containing protein [Cinnamomum micranthum f. kanehirae]
Phoebe_bournei_newGene_1733	--	--	Molecular Function: protein serine/threonine kinase activity (GO:0004674);; Molecular Function: ATP binding (GO:0005524);; Cellular Component: integral component of membrane (GO:0016021);;	K00924|1.8e-22|nnu:104604480|K00924 kinase [EC:2.7.1.-] | (RefSeq) receptor-like protein kinase HSL1	--	--	--	Leucine-rich repeat receptor-like protein kinase PXL1 OS=Arabidopsis thaliana OX=3702 GN=PXL1 PE=1 SV=1	Receptor-like protein kinase HSL1 OS=Cinnamomum micranthum f. kanehirae OX=337451 GN=CKAN_00676600 PE=3 SV=1	T	Signal transduction mechanisms	receptor-like protein kinase HSL1 [Cinnamomum micranthum f. kanehirae]
Phoebe_bournei_newGene_1961	--	--	Molecular Function: damaged DNA binding (GO:0003684);; Cellular Component: nucleoplasm (GO:0005654);; Cellular Component: cytosol (GO:0005829);; Biological Process: nucleotide-excision repair (GO:0006289);; Molecular Function: polyubiquitin modification-dependent protein binding (GO:0031593);; Cellular Component: host cell nucleus (GO:0042025);; Molecular Function: ubiquitin binding (GO:0043130);…	K10839|1.9e-23|nau:109223373|K10839 UV excision repair protein RAD23 | (RefSeq) ubiquitin receptor RAD23b-like isoform X1	[L]	Replication, recombination and repair	UBA/TS-N domain	Ubiquitin receptor RAD23b OS=Arabidopsis thaliana OX=3702 GN=RAD23B PE=1 SV=3	Ubiquitin receptor RAD23 OS=Nicotiana tabacum OX=4097 GN=LOC107780948 PE=3 SV=1	L	Replication, recombination and repair	PREDICTED: ubiquitin receptor RAD23b isoform X1 [Nicotiana sylvestris]
Phoebe_bournei_newGene_5183	--	--	--	--	--	--	Aluminium induced protein	Stem-specific protein TSJT1 OS=Nicotiana tabacum OX=4097 GN=TSJT1 PE=2 SV=1	Stem-specific protein TSJT1 OS=Cinnamomum micranthum f. kanehirae OX=337451 GN=CKAN_01073400 PE=4 SV=1	S	Function unknown	stem-specific protein TSJT1 [Cinnamomum micranthum f. kanehirae]
Phoebe_bournei_newGene_8276	--	--	Biological Process: cytoskeleton organization (GO:0007010);; Molecular Function: microtubule binding (GO:0008017);;	--	--	--	Microtubule-associated protein 70	Microtubule-associated protein 70-1 OS=Oryza sativa subsp. japonica OX=39947 GN=MAP70.1 PE=2 SV=1	Microtubule-associated protein 70-1 OS=Cinnamomum micranthum f. kanehirae OX=337451 GN=CKAN_02377500 PE=3 SV=1	S	Function unknown	microtubule-associated protein 70-1 [Cinnamomum micranthum f. kanehirae]
Phoebe_bournei_newGene_11002	--	--	Molecular Function: electron transfer activity (GO:0009055);; Molecular Function: 2 iron, 2 sulfur cluster binding (GO:0051537);;	K22071|1.9e-30|nnu:104605105|K22071 ferredoxin-2, mitochondrial | (RefSeq) 2Fe-2S ferredoxin-like	[C]	Energy production and conversion	--	Adrenodoxin-like protein 2, mitochondrial OS=Arabidopsis thaliana OX=3702 GN=MFDX2 PE=2 SV=1	2Fe-2S ferredoxin-like protein isoform X1 OS=Cinnamomum micranthum f. kanehirae OX=337451 GN=CKAN_00802500 PE=4 SV=1	C	Energy production and conversion	2Fe-2S ferredoxin-like protein isoform X1 [Cinnamomum micranthum f. kanehirae]
Phoebe_bournei_newGene_4726	--	--	--	--	--	--	Dormancy/auxin associated protein	Dormancy-associated protein homolog 3 OS=Arabidopsis thaliana OX=3702 GN=At1g56220 PE=1 SV=1	Dormancy-associated protein 3 isoform X1 OS=Cinnamomum micranthum f. kanehirae OX=337451 GN=CKAN_02518700 PE=3 SV=1	S	Function unknown	dormancy-associated protein 3 isoform X1 [Cinnamomum micranthum f. kanehirae]
Phoebe_bournei_newGene_6508	--	--	Molecular Function: ATP binding (GO:0005524);; Molecular Function: histone binding (GO:0042393);;	--	--	--	--	--	Chromatin structure-remodeling complex protein SYD-like protein isoform X1 OS=Cinnamomum micranthum f. kanehirae OX=337451 GN=CKAN_00420900 PE=4 SV=1	--	--	chromatin structure-remodeling complex protein SYD-like protein isoform X1 [Cinnamomum micranthum f. kanehirae]
Phoebe_bournei_newGene_13070	--	--	Molecular Function: double-stranded DNA binding (GO:0003690);; Biological Process: regulation of transcription, DNA-templated (GO:0006355);;	K15032|1.5e-57|nnu:109114663|K15032 mTERF domain-containing protein, mitochondrial | (RefSeq) transcription termination factor MTERF8, chloroplastic-like	[KR]	--	mTERF	--	Mitochodrial transcription termination factor-related OS=Cinnamomum micranthum f. kanehirae OX=337451 GN=CKAN_00324400 PE=3 SV=1	K	Transcription	Mitochodrial transcription termination factor-related [Cinnamomum micranthum f. kanehirae]
Phoebe_bournei_newGene_9182	--	--	--	K14948|5.3e-24|jre:109009978|K14948 polypyrimidine tract-binding protein 2 | (RefSeq) polypyrimidine tract-binding protein homolog 3-like isoform X1	--	--	Alginate lyase	Citrate-binding protein OS=Hevea brasiliensis OX=3981 GN=CBP PE=1 SV=1	Citrate-binding-like protein OS=Cinnamomum micranthum f. kanehirae OX=337451 GN=CKAN_01243800 PE=4 SV=1	S	Function unknown	citrate-binding-like protein [Cinnamomum micranthum f. kanehirae]
Phoebe_bournei_newGene_2904	[I]	Lipid transport and metabolism	Molecular Function: hydrolase activity (GO:0016787);;	K22097|6.7e-70|psom:113322812|K22097 3-O-acetylpapaveroxine carboxylesterase [EC:3.1.1.105] | (RefSeq) carboxylesterase 1-like	[V]	Defense mechanisms	alpha/beta hydrolase fold	Probable carboxylesterase 8 OS=Arabidopsis thaliana OX=3702 GN=CXE8 PE=2 SV=1	Putative Carboxyesterase 20 OS=Cinnamomum micranthum f. kanehirae OX=337451 GN=CKAN_01796400 PE=4 SV=1	V	Defense mechanisms	putative Carboxyesterase 20 [Cinnamomum micranthum f. kanehirae]
Phoebe_bournei_newGene_3585	--	--	Cellular Component: integral component of membrane (GO:0016021);;	--	[T]	Signal transduction mechanisms	Organic solute transporter Ostalpha	Protein LAZ1 homolog 2 OS=Arabidopsis thaliana OX=3702 GN=At1g23070 PE=2 SV=1	Protein LAZ1 2 isoform X1 OS=Cinnamomum micranthum f. kanehirae OX=337451 GN=CKAN_00805600 PE=4 SV=1	T	Signal transduction mechanisms	protein LAZ1 2 isoform X1 [Cinnamomum micranthum f. kanehirae]
Phoebe_bournei_newGene_4488	--	--	Cellular Component: Golgi apparatus (GO:0005794);; Biological Process: protein glycosylation (GO:0006486);; Molecular Function: sialyltransferase activity (GO:0008373);; Cellular Component: integral component of membrane (GO:0016021);;	--	[G]	Carbohydrate transport and metabolism	Glycosyltransferase family 29 (sialyltransferase)	Sialyltransferase-like protein 1 OS=Arabidopsis thaliana OX=3702 GN=SIA1 PE=2 SV=1	Sialyltransferase-like protein 1 OS=Cinnamomum micranthum f. kanehirae OX=337451 GN=CKAN_01212500 PE=3 SV=1	G	Carbohydrate transport and metabolism	sialyltransferase-like protein 1 [Cinnamomum micranthum f. kanehirae]
Phoebe_bournei_newGene_4649	[I]	Lipid transport and metabolism	Biological Process: fatty acid biosynthetic process (GO:0006633);; Cellular Component: chloroplast (GO:0009507);; Molecular Function: thiolester hydrolase activity (GO:0016790);;	K10781|6.0e-172|nnu:104592290|K10781 fatty acyl-ACP thioesterase B [EC:3.1.2.14 3.1.2.21] | (RefSeq) palmitoyl-acyl carrier protein thioesterase, chloroplastic	--	--	Acyl-ACP thioesterase	Palmitoyl-acyl carrier protein thioesterase, chloroplastic OS=Gossypium hirsutum OX=3635 GN=FATB1 PE=1 SV=1	Acyl-[acyl-carrier-protein] hydrolase OS=Lindera communis OX=155291 PE=2 SV=1	I	Lipid transport and metabolism	chloroplast acyl carrier protein thioesterase B [Lindera communis]
Phoebe_bournei_newGene_4629	--	--	--	--	--	--	--	--	Myo1 OS=Arundo donax OX=35708 PE=4 SV=1	--	--	--
Phoebe_bournei_newGene_9730	[U]	Intracellular trafficking, secretion, and vesicular transport	Molecular Function: protein kinase activity (GO:0004672);; Molecular Function: ATP binding (GO:0005524);; Cellular Component: integral component of membrane (GO:0016021);;	K16224|2.4e-55|ath:AT2G19190|K16224 senescence-induced receptor-like serine/threonine-protein kinase | (RefSeq) FRK1; FLG22-induced receptor-like kinase 1	--	--	Protein kinase domain	Receptor-like protein kinase At3g21340 OS=Arabidopsis thaliana OX=3702 GN=At3g21340 PE=1 SV=1	Putative LRR receptor-like serine/threonine-protein kinase OS=Cinnamomum micranthum f. kanehirae OX=337451 GN=CKAN_00671600 PE=4 SV=1	T	Signal transduction mechanisms	putative LRR receptor-like serine/threonine-protein kinase [Cinnamomum micranthum f. kanehirae]
Phoebe_bournei_newGene_1459	[E]	Amino acid transport and metabolism	Molecular Function: glutamate-ammonia ligase activity (GO:0004356);; Molecular Function: ATP binding (GO:0005524);; Biological Process: glutamine biosynthetic process (GO:0006542);;	K01915|5.8e-19|cqi:110692005|K01915 glutamine synthetase [EC:6.3.1.2] | (RefSeq) glutamine synthetase nodule isozyme-like	[E]	Amino acid transport and metabolism	--	Glutamine synthetase nodule isozyme OS=Lupinus luteus OX=3873 PE=3 SV=1	Glutamine synthetase OS=Cinnamomum micranthum f. kanehirae OX=337451 GN=CKAN_01348400 PE=3 SV=1	E	Amino acid transport and metabolism	glutamine synthetase nodule isozyme [Cinnamomum micranthum f. kanehirae]
Phoebe_bournei_newGene_2749	--	--	Cellular Component: integral component of membrane (GO:0016021);;	--	--	--	--	--	Putative Actin-binding LIM protein 1 OS=Cinnamomum micranthum f. kanehirae OX=337451 GN=CKAN_00723300 PE=4 SV=1	--	--	putative Actin-binding LIM protein 1 [Cinnamomum micranthum f. kanehirae]
Phoebe_bournei_newGene_3515	--	--	Cellular Component: integral component of membrane (GO:0016021);;	K21989|5.2e-24|cann:107842501|K21989 calcium permeable stress-gated cation channel | (RefSeq) CSC1-like protein At4g02900	[R]	General function prediction only	--	Protein OSCA1 OS=Arabidopsis thaliana OX=3702 GN=OSCA1 PE=1 SV=1	DUF221 domain-containing protein/RSN1_TM domain-containing protein OS=Cephalotus follicularis OX=3775 GN=CFOL_v3_34439 PE=3 SV=1	S	Function unknown	DUF221 domain-containing protein/RSN1_TM domain-containing protein [Cephalotus follicularis]
Phoebe_bournei_newGene_9040	--	--	--	--	--	--	--	--	--	E	Amino acid transport and metabolism	hypothetical protein BO97DRAFT_30932, partial [Aspergillus homomorphus CBS 101889]
Phoebe_bournei_newGene_4681	[J]	Translation, ribosomal structure and biogenesis	Molecular Function: aminopeptidase activity (GO:0004177);;	K01265|5.3e-100|nnu:104602275|K01265 methionyl aminopeptidase [EC:3.4.11.18] | (RefSeq) methionine aminopeptidase 1A	[O]	Posttranslational modification, protein turnover, chaperones	zf-MYND-like zinc finger, mRNA-binding	Methionine aminopeptidase 1A OS=Arabidopsis thaliana OX=3702 GN=MAP1A PE=1 SV=1	Methionine aminopeptidase 1A OS=Cinnamomum micranthum f. kanehirae OX=337451 GN=CKAN_01645600 PE=4 SV=1	O	Posttranslational modification, protein turnover, chaperones	methionine aminopeptidase 1A [Cinnamomum micranthum f. kanehirae]
Phoebe_bournei_newGene_6509	--	--	Molecular Function: ATP binding (GO:0005524);; Molecular Function: histone binding (GO:0042393);;	--	--	--	--	--	Chromatin structure-remodeling complex protein SYD-like protein isoform X1 OS=Cinnamomum micranthum f. kanehirae OX=337451 GN=CKAN_00420900 PE=4 SV=1	--	--	chromatin structure-remodeling complex protein SYD-like protein isoform X1 [Cinnamomum micranthum f. kanehirae]
Phoebe_bournei_newGene_12521	[J]	Translation, ribosomal structure and biogenesis	Molecular Function: RNA binding (GO:0003723);; Molecular Function: structural constituent of ribosome (GO:0003735);; Biological Process: translation (GO:0006412);; Cellular Component: large ribosomal subunit (GO:0015934);;	K02865|9.5e-113|mus:103981132|K02865 large subunit ribosomal protein L10Ae | (RefSeq) 60S ribosomal protein L10a	[J]	Translation, ribosomal structure and biogenesis	Ribosomal protein L1p/L10e family	60S ribosomal protein L10a OS=Oryza sativa subsp. indica OX=39946 GN=RPL10A PE=3 SV=1	60S ribosomal protein L10a-like protein OS=Cinnamomum micranthum f. kanehirae OX=337451 GN=CKAN_01229800 PE=3 SV=1	J	Translation, ribosomal structure and biogenesis	60S ribosomal protein L10a-like protein [Cinnamomum micranthum f. kanehirae]
Phoebe_bournei_newGene_11183	--	--	Molecular Function: translation initiation factor activity (GO:0003743);;	--	--	--	--	--	Eukaryotic translation initiation factor OS=Cinnamomum micranthum f. kanehirae OX=337451 GN=CKAN_01130700 PE=4 SV=1	--	--	eukaryotic translation initiation factor [Cinnamomum micranthum f. kanehirae]
Phoebe_bournei_newGene_3719	--	--	Molecular Function: molecular_function (GO:0003674);; Molecular Function: GTPase activator activity (GO:0005096);; Molecular Function: binding (GO:0005488);; Molecular Function: phospholipid binding (GO:0005543);; Cellular Component: cellular_component (GO:0005575);; Cellular Component: intracellular (GO:0005622);; Cellular Component: obsolete cell (GO:0005623);; Cellular Component: nucleus (GO:0…	K12486|3.5e-35|ppp:112275251|K12486 stromal membrane-associated protein | (RefSeq) probable ADP-ribosylation factor GTPase-activating protein AGD13	[R]	General function prediction only	C2 domain	Protein C2-DOMAIN ABA-RELATED 11 OS=Arabidopsis thaliana OX=3702 GN=CAR11 PE=1 SV=1	protein C2-DOMAIN ABA-RELATED 11 OS=Nelumbo nucifera OX=4432 GN=LOC104587887 PE=4 SV=1	S	Function unknown	C2 calcium-dependent membrane targeting [Macleaya cordata]
Phoebe_bournei_newGene_10265	[T]	Signal transduction mechanisms	Molecular Function: protein kinase activity (GO:0004672);; Molecular Function: ATP binding (GO:0005524);; Cellular Component: integral component of membrane (GO:0016021);; Biological Process: recognition of pollen (GO:0048544);;	K24104|4.3e-79|thj:104799061|K24104 GPN-loop GTPase | (RefSeq) LOW QUALITY PROTEIN: uncharacterized protein LOC104799061	--	--	Protein kinase domain	G-type lectin S-receptor-like serine/threonine-protein kinase At4g03230 OS=Arabidopsis thaliana OX=3702 GN=At4g03230 PE=3 SV=3	Receptor-like serine/threonine-protein kinase SD1-6 OS=Cinnamomum micranthum f. kanehirae OX=337451 GN=CKAN_01709600 PE=4 SV=1	T	Signal transduction mechanisms	receptor-like serine/threonine-protein kinase SD1-6 [Cinnamomum micranthum f. kanehirae]
Phoebe_bournei_newGene_2966	--	--	--	--	--	--	--	--	Uncharacterized protein OS=Microthlaspi erraticum OX=1685480 GN=MERR_LOCUS11284 PE=4 SV=1	--	--	LOW QUALITY PROTEIN: uncharacterized protein LOC110824418, partial [Carica papaya]
Phoebe_bournei_newGene_1801	--	--	Molecular Function: magnesium ion binding (GO:0000287);; Molecular Function: terpene synthase activity (GO:0010333);; Cellular Component: integral component of membrane (GO:0016021);;	K15803|3.6e-19|cit:102612857|K15803 (-)-germacrene D synthase [EC:4.2.3.75] | (RefSeq) (-)-germacrene D synthase-like	--	--	Terpene synthase family, metal binding domain	Probable terpene synthase 2 OS=Ricinus communis OX=3988 GN=TPS2 PE=3 SV=1	Terpene synthase 1 OS=Cinnamomum micranthum f. kanehirae OX=337451 GN=CKAN_02277100 PE=4 SV=1	S	Function unknown	terpene synthase 1 [Cinnamomum micranthum f. kanehirae]
Phoebe_bournei_newGene_4519	[G]	Carbohydrate transport and metabolism	Molecular Function: mannose-6-phosphate isomerase activity (GO:0004476);; Biological Process: carbohydrate metabolic process (GO:0005975);; Molecular Function: zinc ion binding (GO:0008270);; Biological Process: GDP-mannose biosynthetic process (GO:0009298);;	K01809|3.1e-171|hbr:110637843|K01809 mannose-6-phosphate isomerase [EC:5.3.1.8] | (RefSeq) mannose-6-phosphate isomerase 1-like	[G]	Carbohydrate transport and metabolism	Phosphomannose isomerase type I	Mannose-6-phosphate isomerase 1 OS=Arabidopsis thaliana OX=3702 GN=PMI1 PE=1 SV=1	Mannose-6-phosphate isomerase OS=Cinnamomum micranthum f. kanehirae OX=337451 GN=CKAN_02314100 PE=3 SV=1	G	Carbohydrate transport and metabolism	mannose-6-phosphate isomerase 1-like protein [Cinnamomum micranthum f. kanehirae]
Phoebe_bournei_newGene_13027	--	--	Biological Process: defense response (GO:0006952);; Molecular Function: ADP binding (GO:0043531);;	--	--	--	--	--	Putative disease resistance protein RGA1 OS=Cinnamomum micranthum f. kanehirae OX=337451 GN=CKAN_00324700 PE=4 SV=1	T	Signal transduction mechanisms	putative disease resistance protein RGA1 [Cinnamomum micranthum f. kanehirae]
Phoebe_bournei_newGene_6819	--	--	Cellular Component: nucleus (GO:0005634);; Biological Process: regulation of transcription, DNA-templated (GO:0006355);; Molecular Function: zinc ion binding (GO:0008270);;	K13963|2.3e-123|vra:111242705|K13963 serpin B | (RefSeq) uncharacterized protein LOC111242705	--	--	FAR1 DNA-binding domain	Protein FAR1-RELATED SEQUENCE 5 OS=Arabidopsis thaliana OX=3702 GN=FRS5 PE=1 SV=1	Protein FAR1-RELATED SEQUENCE OS=Cinnamomum micranthum f. kanehirae OX=337451 GN=CKAN_00358000 PE=3 SV=1	S	Function unknown	protein FAR1-RELATED SEQUENCE 5 isoform X1 [Cinnamomum micranthum f. kanehirae]
Phoebe_bournei_newGene_1616	[IQR]	--	--	K19329|8.9e-107|gab:108482000|K19329 WW domain-containing oxidoreductase | (RefSeq) short-chain dehydrogenase TIC 32, chloroplastic-like	[Q]	Secondary metabolites biosynthesis, transport and catabolism	short chain dehydrogenase	Short-chain dehydrogenase TIC 32 B, chloroplastic OS=Brassica napus OX=3708 GN=TIC32B PE=3 SV=1	Short-chain dehydrogenase TIC 32, chloroplastic isoform X1 OS=Cinnamomum micranthum f. kanehirae OX=337451 GN=CKAN_00525800 PE=3 SV=1	Q	Secondary metabolites biosynthesis, transport and catabolism	short-chain dehydrogenase TIC 32, chloroplastic isoform X1 [Cinnamomum micranthum f. kanehirae]
Phoebe_bournei_newGene_7404	--	--	Molecular Function: ATP binding (GO:0005524);; Molecular Function: 1-phosphatidylinositol-4-phosphate 5-kinase activity (GO:0016308);;	K00889|3.4e-136|egu:105041334|K00889 1-phosphatidylinositol-4-phosphate 5-kinase [EC:2.7.1.68] | (RefSeq) phosphatidylinositol 4-phosphate 5-kinase 1 isoform X1	[T]	Signal transduction mechanisms	Phosphatidylinositol-4-phosphate 5-Kinase	Phosphatidylinositol 4-phosphate 5-kinase 1 OS=Oryza sativa subsp. japonica OX=39947 GN=PIPK1 PE=2 SV=2	Phosphatidylinositol 4-phosphate 5-kinase OS=Cinnamomum micranthum f. kanehirae OX=337451 GN=CKAN_01922300 PE=4 SV=1	T	Signal transduction mechanisms	Phosphatidylinositol-4-phosphate 5-kinase [Cinnamomum micranthum f. kanehirae]
Phoebe_bournei_newGene_1183	[E]	Amino acid transport and metabolism	Biological Process: cellular amino acid metabolic process (GO:0006520);; Molecular Function: transaminase activity (GO:0008483);; Biological Process: biosynthetic process (GO:0009058);; Molecular Function: pyridoxal phosphate binding (GO:0030170);;	K00815|2.2e-88|nnu:104592560|K00815 tyrosine aminotransferase [EC:2.6.1.5] | (RefSeq) probable aminotransferase TAT2	[E]	Amino acid transport and metabolism	Aminotransferase class I and II	Nicotianamine aminotransferase 1 OS=Oryza sativa subsp. japonica OX=39947 GN=NAAT1 PE=1 SV=1	Aminotransferase, class I/classII OS=Cinnamomum micranthum f. kanehirae OX=337451 GN=CKAN_02694300 PE=3 SV=1	E	Amino acid transport and metabolism	Aminotransferase, class I/classII [Cinnamomum micranthum f. kanehirae]
Phoebe_bournei_newGene_10695	--	--	--	--	--	--	PPR repeat family	--	Uncharacterized protein OS=Cinnamomum micranthum f. kanehirae OX=337451 GN=CKAN_01397400 PE=4 SV=1	--	--	hypothetical protein CKAN_01397400 [Cinnamomum micranthum f. kanehirae]
Phoebe_bournei_newGene_267	--	--	Biological Process: regulation of translation (GO:0006417);; Cellular Component: CCR4-NOT core complex (GO:0030015);;	K12604|5.0e-08|nnu:104598503|K12604 CCR4-NOT transcription complex subunit 1 | (RefSeq) CCR4-NOT transcription complex subunit 1	--	--	--	--	CCR4-Not complex component OS=Macleaya cordata OX=56857 GN=BVC80_1001g9 PE=4 SV=1	--	--	CCR4-Not complex component [Macleaya cordata]
Phoebe_bournei_newGene_6429	--	--	--	K22262|1.0e-36|qsu:112034235|K22262 WD repeat and FYVE domain-containing protein 3 | (RefSeq) protein SPIRRIG	[R]	General function prediction only	PPR repeat family	Pentatricopeptide repeat-containing protein At1g15510, chloroplastic OS=Arabidopsis thaliana OX=3702 GN=PCMP-H73 PE=1 SV=1	Pentatricopeptide repeat-containing protein OS=Vitis vinifera OX=29760 GN=PCMP-H43_3 PE=4 SV=1	S	Function unknown	Pentatricopeptide repeat-containing protein [Thalictrum thalictroides]
Phoebe_bournei_newGene_10476	[K]	Transcription	Molecular Function: ADP binding (GO:0043531);;	K13459|1.6e-139|nnu:104589875|K13459 disease resistance protein RPS2 | (RefSeq) probable disease resistance protein At1g61300	[T]	Signal transduction mechanisms	NB-ARC domain	Disease resistance protein At4g27190 OS=Arabidopsis thaliana OX=3702 GN=At4g27190 PE=2 SV=1	Putative disease resistance protein OS=Cinnamomum micranthum f. kanehirae OX=337451 GN=CKAN_00024300 PE=4 SV=1	T	Signal transduction mechanisms	putative disease resistance protein [Cinnamomum micranthum f. kanehirae]
Phoebe_bournei_newGene_660	[O]	Posttranslational modification, protein turnover, chaperones	Molecular Function: peptidyl-prolyl cis-trans isomerase activity (GO:0003755);; Biological Process: protein folding (GO:0006457);;	K05864|1.6e-192|nnu:104605465|K05864 peptidyl-prolyl isomerase D [EC:5.2.1.8] | (RefSeq) peptidyl-prolyl cis-trans isomerase CYP40	[O]	Posttranslational modification, protein turnover, chaperones	Cyclophilin type peptidyl-prolyl cis-trans isomerase/CLD	Peptidyl-prolyl cis-trans isomerase CYP40 OS=Arabidopsis thaliana OX=3702 GN=CYP40 PE=2 SV=1	Peptidylprolyl isomerase OS=Cinnamomum micranthum f. kanehirae OX=337451 GN=CKAN_01907100 PE=4 SV=1	O	Posttranslational modification, protein turnover, chaperones	peptidyl-prolyl cis-trans isomerase CYP40 [Cinnamomum micranthum f. kanehirae]
Phoebe_bournei_newGene_1673	--	--	Molecular Function: molecular_function (GO:0003674);; Molecular Function: transcription coregulator activity (GO:0003712);; Molecular Function: transcription corepressor activity (GO:0003714);; Cellular Component: cellular_component (GO:0005575);; Cellular Component: intracellular (GO:0005622);; Cellular Component: obsolete cell (GO:0005623);; Cellular Component: nucleus (GO:0005634);; Biological…	K13464|2.1e-08|tcc:18588249|K13464 jasmonate ZIM domain-containing protein | (RefSeq) protein TIFY 10A	--	--	tify domain	Protein TIFY 4B OS=Arabidopsis thaliana OX=3702 GN=TIFY4B PE=1 SV=1	Protein TIFY 4B-like protein isoform X1 OS=Cinnamomum micranthum f. kanehirae OX=337451 GN=CKAN_00881600 PE=3 SV=1	S	Function unknown	protein TIFY 4B-like protein isoform X1 [Cinnamomum micranthum f. kanehirae]
Phoebe_bournei_newGene_1548	--	--	Molecular Function: hydrolase activity (GO:0016787);;	--	--	--	NUDIX domain	Nudix hydrolase 9 OS=Arabidopsis thaliana OX=3702 GN=NUDT9 PE=2 SV=1	Nudix hydrolase 9 isoform X1 OS=Cinnamomum micranthum f. kanehirae OX=337451 GN=CKAN_00532600 PE=4 SV=1	S	Function unknown	nudix hydrolase 9 isoform X1 [Cinnamomum micranthum f. kanehirae]
Phoebe_bournei_newGene_1746	[O]	Posttranslational modification, protein turnover, chaperones	Molecular Function: metalloendopeptidase activity (GO:0004222);; Molecular Function: ATP binding (GO:0005524);;	K03798|4.1e-90|ccp:CHC_T00009248001|K03798 cell division protease FtsH [EC:3.4.24.-] | (RefSeq) cell division protein FtsH	[O]	Posttranslational modification, protein turnover, chaperones	ATPase family associated with various cellular activities (AAA)	Probable inactive ATP-dependent zinc metalloprotease FTSHI 2, chloroplastic OS=Arabidopsis thaliana OX=3702 GN=FTSHI2 PE=1 SV=1	Putative inactive ATP-dependent zinc metalloprotease FTSHI 2, chloroplastic OS=Cinnamomum micranthum f. kanehirae OX=337451 GN=CKAN_00680300 PE=4 SV=1	O	Posttranslational modification, protein turnover, chaperones	putative inactive ATP-dependent zinc metalloprotease FTSHI 2, chloroplastic [Cinnamomum micranthum f. kanehirae]
Phoebe_bournei_newGene_6878	--	--	Molecular Function: molecular_function (GO:0003674);; Molecular Function: catalytic activity (GO:0003824);; Molecular Function: ubiquitin-protein transferase activity (GO:0004842);; Molecular Function: protein binding (GO:0005515);; Biological Process: cellular protein modification process (GO:0006464);; Biological Process: proteolysis (GO:0006508);; Biological Process: ubiquitin-dependent protei…	--	--	--	F-box domain	F-box only protein 13 OS=Arabidopsis thaliana OX=3702 GN=FBX13 PE=2 SV=2	F-box only protein 13-like protein OS=Cinnamomum micranthum f. kanehirae OX=337451 GN=CKAN_00280300 PE=4 SV=1	S	Function unknown	F-box only protein 13-like protein [Cinnamomum micranthum f. kanehirae]
Phoebe_bournei_newGene_13436	[J]	Translation, ribosomal structure and biogenesis	Molecular Function: RNA binding (GO:0003723);; Cellular Component: nucleolus (GO:0005730);; Biological Process: ribosome biogenesis (GO:0042254);; Cellular Component: ribonucleoprotein complex (GO:1990904);;	K12845|6.3e-64|mus:103999471|K12845 U4/U6 small nuclear ribonucleoprotein SNU13 | (RefSeq) NHP2-like protein 1	[AJ]	--	Ribosomal protein L7Ae/L30e/S12e/Gadd45 family	--	Ribonucloprotein OS=Cinnamomum micranthum f. kanehirae OX=337451 GN=CKAN_01776000 PE=3 SV=1	--	--	NHP2-like protein 1 [Cinnamomum micranthum f. kanehirae]
Phoebe_bournei_newGene_43	--	--	Molecular Function: GTPase activity (GO:0003924);; Molecular Function: GTP binding (GO:0005525);;	K07897|1.1e-60|nnu:104587405|K07897 Ras-related protein Rab-7A | (RefSeq) ras-related protein Rab7	[R]	General function prediction only	Ras family	Ras-related protein Rab7 OS=Glycine max OX=3847 PE=2 SV=1	Ras-related protein Rab7 OS=Cinnamomum micranthum f. kanehirae OX=337451 GN=CKAN_02498800 PE=4 SV=1	U	Intracellular trafficking, secretion, and vesicular transport	ras-related protein Rab7 [Cinnamomum micranthum f. kanehirae]
Phoebe_bournei_newGene_13107	--	--	--	--	--	--	--	--	DDE Tnp4 domain-containing protein OS=Hevea brasiliensis OX=3981 GN=GH714_042312 PE=3 SV=1	S	Function unknown	hypothetical protein GH714_042312 [Hevea brasiliensis]
Phoebe_bournei_newGene_7669	--	--	Cellular Component: integral component of membrane (GO:0016021);;	K13466|1.8e-33|fve:101315391|K13466 EIX receptor 1/2 | (RefSeq) probable LRR receptor-like serine/threonine-protein kinase At1g34110	--	--	Leucine rich repeat	--	Receptor-like protein 12 OS=Cinnamomum micranthum f. kanehirae OX=337451 GN=CKAN_02101900 PE=4 SV=1	Q	Secondary metabolites biosynthesis, transport and catabolism	receptor-like protein 12 [Cinnamomum micranthum f. kanehirae]
Phoebe_bournei_newGene_2349	[R]	General function prediction only	Molecular Function: GTPase activity (GO:0003924);; Molecular Function: GTP binding (GO:0005525);;	K07874|4.7e-106|pda:103713601|K07874 Ras-related protein Rab-1A | (RefSeq) GTP-binding protein YPTM2	[TU]	--	Ras family	Ras-related protein RIC1 OS=Oryza sativa subsp. japonica OX=39947 GN=RIC1 PE=2 SV=2	Small GTPase superfamily OS=Cinnamomum micranthum f. kanehirae OX=337451 GN=CKAN_01147300 PE=4 SV=1	U	Intracellular trafficking, secretion, and vesicular transport	Small GTPase superfamily [Cinnamomum micranthum f. kanehirae]
Phoebe_bournei_newGene_2899	--	--	Molecular Function: actin binding (GO:0003779);;	--	--	--	--	Protein NETWORKED 1A OS=Arabidopsis thaliana OX=3702 GN=NET1A PE=1 SV=1	Protein NETWORKED 1D isoform X2 OS=Cinnamomum micranthum f. kanehirae OX=337451 GN=CKAN_01797400 PE=4 SV=1	S	Function unknown	protein NETWORKED 1D isoform X2 [Cinnamomum micranthum f. kanehirae]
Phoebe_bournei_newGene_6148	--	--	Molecular Function: protein serine/threonine kinase activity (GO:0004674);; Molecular Function: ATP binding (GO:0005524);; Molecular Function: carbohydrate binding (GO:0030246);; Biological Process: recognition of pollen (GO:0048544);;	--	--	--	--	G-type lectin S-receptor-like serine/threonine-protein kinase SD1-1 OS=Arabidopsis thaliana OX=3702 GN=SD11 PE=1 SV=1	Receptor-like serine/threonine-protein kinase OS=Cinnamomum micranthum f. kanehirae OX=337451 GN=CKAN_01717200 PE=3 SV=1	--	--	G-type lectin S-receptor-like serine/threonine-protein kinase RKS1 [Cinnamomum micranthum f. kanehirae]
Phoebe_bournei_newGene_8260	[R]	General function prediction only	Molecular Function: nitronate monooxygenase activity (GO:0018580);;	K00459|2.0e-14|qsu:112009670|K00459 nitronate monooxygenase [EC:1.13.12.16] | (RefSeq) nitronate monooxygenase-like	--	--	Nitronate monooxygenase	--	Nitronate monooxygenase-like protein OS=Cinnamomum micranthum f. kanehirae OX=337451 GN=CKAN_02380400 PE=4 SV=1	S	Function unknown	nitronate monooxygenase-like protein [Cinnamomum micranthum f. kanehirae]
Phoebe_bournei_newGene_3214	--	--	Cellular Component: nuclear MIS12/MIND complex (GO:0000818);;	--	--	--	Nnf1	--	Nnf1 OS=Macleaya cordata OX=56857 GN=BVC80_1833g167 PE=4 SV=1	--	--	Nnf1 [Macleaya cordata]
Phoebe_bournei_newGene_3399	--	--	--	--	--	--	--	Uncharacterized protein At3g17950 OS=Arabidopsis thaliana OX=3702 GN=Y-3 PE=1 SV=1	Uncharacterized protein OS=Cinnamomum micranthum f. kanehirae OX=337451 GN=CKAN_01494600 PE=4 SV=1	S	Function unknown	hypothetical protein CKAN_01494600 [Cinnamomum micranthum f. kanehirae]
Phoebe_bournei_newGene_4295	[I]	Lipid transport and metabolism	Cellular Component: integral component of membrane (GO:0016021);;	--	[R]	General function prediction only	Alpha/beta hydrolase family	--	SOUL heme-binding protein OS=Cinnamomum micranthum f. kanehirae OX=337451 GN=CKAN_00151600 PE=4 SV=1	--	--	SOUL heme-binding protein [Cinnamomum micranthum f. kanehirae]
Phoebe_bournei_newGene_5840	[IQR]	--	Molecular Function: oxidoreductase activity (GO:0016491);;	K13070|5.7e-86|dosa:Os04t0179200-01|K13070 momilactone-A synthase [EC:1.1.1.295] | (RefSeq) Os04g0179200, MAS, MOMILACTONE_A_SYNTHASE; Similar to Stem secoisolariciresinol dehydrogenase (Fragment).	[R]	General function prediction only	Enoyl-(Acyl carrier protein) reductase	Secoisolariciresinol dehydrogenase (Fragment) OS=Forsythia intermedia OX=55183 PE=1 SV=1	Short-chain dehydrogenase/reductase SDR OS=Cinnamomum micranthum f. kanehirae OX=337451 GN=CKAN_01408000 PE=4 SV=1	Q	Secondary metabolites biosynthesis, transport and catabolism	Short-chain dehydrogenase/reductase SDR [Cinnamomum micranthum f. kanehirae]
Phoebe_bournei_newGene_2354	--	--	Biological Process: protein targeting to vacuole (GO:0006623);; Molecular Function: clathrin binding (GO:0030276);;	K12471|3.0e-95|nnu:104604450|K12471 epsin | (RefSeq) clathrin interactor EPSIN 1-like	[F]	Nucleotide transport and metabolism	ENTH domain	Clathrin interactor EPSIN 1 OS=Arabidopsis thaliana OX=3702 GN=EPSIN1 PE=1 SV=1	Clathrin interactor EPSIN 1-like protein OS=Cinnamomum micranthum f. kanehirae OX=337451 GN=CKAN_01145300 PE=4 SV=1	F	Nucleotide transport and metabolism	clathrin interactor EPSIN 1-like protein [Cinnamomum micranthum f. kanehirae]
Phoebe_bournei_newGene_2222	--	--	Molecular Function: glycolipid mannosyltransferase activity (GO:0004376);; Cellular Component: endoplasmic reticulum membrane (GO:0005789);; Biological Process: GPI anchor biosynthetic process (GO:0006506);; Cellular Component: integral component of membrane (GO:0016021);; Molecular Function: alpha-1,4-mannosyltransferase activity (GO:0051751);;	K05284|1.0e-63|mcha:111007957|K05284 GPI mannosyltransferase 1 subunit M [EC:2.4.1.-] | (RefSeq) GPI mannosyltransferase 1	[G]	Carbohydrate transport and metabolism	Mannosyltransferase (PIG-M)	GPI mannosyltransferase 1 OS=Arabidopsis thaliana OX=3702 GN=PIGM PE=2 SV=1	GPI mannosyltransferase 1 OS=Cinnamomum micranthum f. kanehirae OX=337451 GN=CKAN_01464900 PE=3 SV=1	G	Carbohydrate transport and metabolism	GPI mannosyltransferase 1 [Cinnamomum micranthum f. kanehirae]
Phoebe_bournei_newGene_9369	--	--	Biological Process: sister chromatid cohesion (GO:0007062);; Cellular Component: cohesin complex (GO:0008278);;	K06670|5.2e-09|nnu:104586818|K06670 cohesin complex subunit SCC1 | (RefSeq) sister chromatid cohesion 1 protein 4	[D]	Cell cycle control, cell division, chromosome partitioning	--	Sister chromatid cohesion 1 protein 4 OS=Arabidopsis thaliana OX=3702 GN=SYN4 PE=2 SV=1	Rad21/Rec8-like protein OS=Cinnamomum micranthum f. kanehirae OX=337451 GN=CKAN_01269500 PE=3 SV=1	D	Cell cycle control, cell division, chromosome partitioning	Rad21/Rec8-like protein [Cinnamomum micranthum f. kanehirae]
Phoebe_bournei_newGene_3821	[T]	Signal transduction mechanisms	Molecular Function: protein kinase activity (GO:0004672);; Molecular Function: ATP binding (GO:0005524);; Cellular Component: integral component of membrane (GO:0016021);; Biological Process: recognition of pollen (GO:0048544);;	K24104|6.2e-50|thj:104799061|K24104 GPN-loop GTPase | (RefSeq) LOW QUALITY PROTEIN: uncharacterized protein LOC104799061	--	--	Protein kinase domain	G-type lectin S-receptor-like serine/threonine-protein kinase At4g03230 OS=Arabidopsis thaliana OX=3702 GN=At4g03230 PE=3 SV=3	Protein kinase domain-containing protein OS=Cinnamomum micranthum f. kanehirae OX=337451 GN=CKAN_01717600 PE=4 SV=1	--	--	Protein kinase domain-containing protein [Cinnamomum micranthum f. kanehirae]
Phoebe_bournei_newGene_7298	[O]	Posttranslational modification, protein turnover, chaperones	Cellular Component: nucleus (GO:0005634);; Cellular Component: cytoplasm (GO:0005737);; Biological Process: protein ubiquitination (GO:0016567);; Biological Process: modification-dependent protein catabolic process (GO:0019941);; Molecular Function: protein tag (GO:0031386);; Molecular Function: ubiquitin protein ligase binding (GO:0031625);;	K08770|3.6e-255|adu:107466949|K08770 ubiquitin C | (RefSeq) polyubiquitin isoform X1	[OR]	--	Ubiquitin family	Polyubiquitin OS=Nicotiana sylvestris OX=4096 GN=UBI11 PE=2 SV=1	polyubiquitin-like OS=Gossypium hirsutum OX=3635 GN=LOC107903491 PE=4 SV=1	O	Posttranslational modification, protein turnover, chaperones	polyubiquitin isoform X1 [Medicago truncatula]
Phoebe_bournei_newGene_8962	--	--	--	--	--	--	--	--	Uncharacterized protein OS=Lupinus albus OX=3870 GN=Lal_00048555 PE=4 SV=1	--	--	PREDICTED: uncharacterized protein LOC105953700 [Erythranthe guttata]
Phoebe_bournei_newGene_3992	[R]	General function prediction only	Molecular Function: protein binding (GO:0005515);;	--	[R]	General function prediction only	WD domain, G-beta repeat	Protein JINGUBANG OS=Arabidopsis thaliana OX=3702 GN=JGB PE=1 SV=1	Vegetative incompatibility protein HET-E-1-like protein OS=Cinnamomum micranthum f. kanehirae OX=337451 GN=CKAN_01981000 PE=4 SV=1	S	Function unknown	vegetative incompatibility protein HET-E-1-like protein [Cinnamomum micranthum f. kanehirae]
Phoebe_bournei_newGene_5454	[I]	Lipid transport and metabolism	Biological Process: lipid metabolic process (GO:0006629);;	K16818|1.2e-34|gmx:100817287|K16818 phospholipase A1 [EC:3.1.1.32] | (RefSeq) phospholipase A(1) DAD1, chloroplastic	[I]	Lipid transport and metabolism	Lipase (class 3)	Phospholipase A1-Igamma1, chloroplastic OS=Arabidopsis thaliana OX=3702 GN=At1g06800 PE=1 SV=2	Phospholipase A1-Igamma1, chloroplastic-like protein OS=Cinnamomum micranthum f. kanehirae OX=337451 GN=CKAN_01780300 PE=4 SV=1	I	Lipid transport and metabolism	phospholipase A1-Igamma1, chloroplastic-like protein [Cinnamomum micranthum f. kanehirae]
Phoebe_bournei_newGene_8460	--	--	--	--	--	--	--	--	Uncharacterized protein OS=Microthlaspi erraticum OX=1685480 GN=MERR_LOCUS11284 PE=4 SV=1	--	--	LOW QUALITY PROTEIN: uncharacterized protein LOC110824418, partial [Carica papaya]
Phoebe_bournei_newGene_11261	--	--	Cellular Component: RNA polymerase II, core complex (GO:0005665);; Cellular Component: RNA polymerase III complex (GO:0005666);; Cellular Component: RNA polymerase I complex (GO:0005736);; Biological Process: transcription by RNA polymerase II (GO:0006366);; Biological Process: transcription by RNA polymerase III (GO:0006383);;	K03016|1.1e-72|egu:105060651|K03016 DNA-directed RNA polymerases I, II, and III subunit RPABC3 | (RefSeq) DNA-directed RNA polymerases II, IV and V subunit 8B	[K]	Transcription	RNA polymerase Rpb8	DNA-directed RNA polymerases II, IV and V subunit 8B OS=Arabidopsis thaliana OX=3702 GN=NRPB8B PE=1 SV=1	RNA polymerase OS=Cinnamomum micranthum f. kanehirae OX=337451 GN=CKAN_01745000 PE=3 SV=1	K	Transcription	RNA polymerase [Cinnamomum micranthum f. kanehirae]
Phoebe_bournei_newGene_10213	--	--	Cellular Component: integral component of membrane (GO:0016021);;	--	--	--	Leucine rich repeat	--	Leucine-rich repeat-containing protein OS=Cinnamomum micranthum f. kanehirae OX=337451 GN=CKAN_01958000 PE=4 SV=1	S	Function unknown	Leucine-rich repeat-containing protein [Cinnamomum micranthum f. kanehirae]
Phoebe_bournei_newGene_10214	--	--	Cellular Component: integral component of membrane (GO:0016021);;	--	--	--	Leucine rich repeat	Phytosulfokine receptor 1 OS=Arabidopsis thaliana OX=3702 GN=PSKR1 PE=1 SV=4	Leucine-rich repeat-containing protein OS=Cinnamomum micranthum f. kanehirae OX=337451 GN=CKAN_01958000 PE=4 SV=1	T	Signal transduction mechanisms	Leucine-rich repeat-containing protein [Cinnamomum micranthum f. kanehirae]
Phoebe_bournei_newGene_2085	[G]	Carbohydrate transport and metabolism	Molecular Function: UDP-glycosyltransferase activity (GO:0008194);;	K23260|9.8e-132|tcc:18607969|K23260 scopoletin glucosyltransferase [EC:2.4.1.128] | (RefSeq) scopoletin glucosyltransferase	[GC]	--	UDP-glucoronosyl and UDP-glucosyl transferase	Scopoletin glucosyltransferase OS=Nicotiana tabacum OX=4097 GN=TOGT1 PE=1 SV=1	Scopoletin glucosyltransferase OS=Cinnamomum micranthum f. kanehirae OX=337451 GN=CKAN_01629500 PE=3 SV=1	--	--	Scopoletin glucosyltransferase [Cinnamomum micranthum f. kanehirae]
Phoebe_bournei_newGene_4142	[R]	General function prediction only	Molecular Function: protein kinase activity (GO:0004672);; Molecular Function: ATP binding (GO:0005524);;	K14500|6.3e-136|bvg:104907855|K14500 BR-signaling kinase [EC:2.7.11.1] | (RefSeq) probable serine/threonine-protein kinase At5g41260	--	--	Protein tyrosine and serine/threonine kinase	Serine/threonine-protein kinase BSK5 OS=Arabidopsis thaliana OX=3702 GN=BSK5 PE=1 SV=1	Putative serine/threonine-protein kinase OS=Cinnamomum micranthum f. kanehirae OX=337451 GN=CKAN_01025100 PE=4 SV=1	T	Signal transduction mechanisms	putative serine/threonine-protein kinase [Cinnamomum micranthum f. kanehirae]
Phoebe_bournei_newGene_13432	--	--	Cellular Component: integral component of membrane (GO:0016021);;	--	--	--	--	Cadmium-induced protein AS8 OS=Arabidopsis thaliana OX=3702 GN=At4g19070 PE=2 SV=1	DUF4218 domain-containing protein OS=Vitis vinifera OX=29760 GN=VITISV_014193 PE=4 SV=1	S	Function unknown	hypothetical protein VITISV_014193 [Vitis vinifera]
Phoebe_bournei_newGene_2802	--	--	Cellular Component: mitochondrial intermembrane space (GO:0005758);; Molecular Function: methyltransferase activity (GO:0008168);; Molecular Function: electron transfer activity (GO:0009055);; Biological Process: iron-sulfur cluster assembly (GO:0016226);; Molecular Function: metal ion binding (GO:0046872);; Molecular Function: 2 iron, 2 sulfur cluster binding (GO:0051537);; Molecular Function: 4…	K22746|4.0e-32|nnu:104611782|K22746 anamorsin | (RefSeq) anamorsin homolog	[S]	Function unknown	--	Anamorsin homolog OS=Vitis vinifera OX=29760 GN=VIT_01s0010g01180 PE=3 SV=1	Anamorsin homolog OS=Cinnamomum micranthum f. kanehirae OX=337451 GN=CKAN_02180700 PE=3 SV=1	J	Translation, ribosomal structure and biogenesis	hypothetical protein CKAN_02180700 [Cinnamomum micranthum f. kanehirae]
Phoebe_bournei_newGene_12270	--	--	Molecular Function: protein serine/threonine kinase activity (GO:0004674);; Molecular Function: ATP binding (GO:0005524);; Cellular Component: integral component of membrane (GO:0016021);; Molecular Function: carbohydrate binding (GO:0030246);; Biological Process: recognition of pollen (GO:0048544);;	K13416|1.4e-60|mdm:103416332|K13416 brassinosteroid insensitive 1-associated receptor kinase 1 [EC:2.7.10.1 2.7.11.1] | (RefSeq) BRASSINOSTEROID INSENSITIVE 1-associated receptor kinase 1-like isoform X1	--	--	Protein kinase domain	G-type lectin S-receptor-like serine/threonine-protein kinase At2g19130 OS=Arabidopsis thaliana OX=3702 GN=At2g19130 PE=2 SV=1	Receptor-like serine/threonine-protein kinase OS=Cinnamomum micranthum f. kanehirae OX=337451 GN=CKAN_02008100 PE=3 SV=1	T	Signal transduction mechanisms	G-type lectin S-receptor-like serine/threonine-protein kinase [Cinnamomum micranthum f. kanehirae]
Phoebe_bournei_newGene_6776	--	--	Biological Process: defense response (GO:0006952);; Molecular Function: ADP binding (GO:0043531);;	K15078|1.2e-13|tcc:18614561|K15078 structure-specific endonuclease subunit SLX1 [EC:3.6.1.-] | (RefSeq) putative disease resistance protein RGA3	--	--	Rx N-terminal domain	Putative disease resistance protein RGA4 OS=Solanum bulbocastanum OX=147425 GN=RGA4 PE=2 SV=1	Putative disease resistance protein RGA1 OS=Cinnamomum micranthum f. kanehirae OX=337451 GN=CKAN_00193300 PE=4 SV=1	T	Signal transduction mechanisms	putative disease resistance protein RGA1 [Cinnamomum micranthum f. kanehirae]
Phoebe_bournei_newGene_3911	--	--	Molecular Function: aspartic-type endopeptidase activity (GO:0004190);; Cellular Component: integral component of membrane (GO:0016021);;	K09595|1.3e-167|vvi:100243157|K09595 minor histocompatibility antigen H13 [EC:3.4.23.-] | (RefSeq) signal peptide peptidase	[S]	Function unknown	Signal peptide peptidase	Signal peptide peptidase OS=Arabidopsis thaliana OX=3702 GN=SPP PE=2 SV=1	Signal peptide peptidase OS=Cinnamomum micranthum f. kanehirae OX=337451 GN=CKAN_00850000 PE=3 SV=1	S	Function unknown	signal peptide peptidase [Cinnamomum micranthum f. kanehirae]
Phoebe_bournei_newGene_11852	--	--	Cellular Component: membrane (GO:0016020);; Molecular Function: transferase activity (GO:0016740);;	K20891|1.4e-176|nnu:104592421|K20891 beta-glucuronosyltransferase [EC:2.4.1.-] | (RefSeq) beta-glucuronosyltransferase GlcAT14B-like	[G]	Carbohydrate transport and metabolism	Core-2/I-Branching enzyme	Beta-glucuronosyltransferase GlcAT14B OS=Arabidopsis thaliana OX=3702 GN=GLCAT14B PE=2 SV=1	Beta-glucuronosyltransferase GlcAT14B-like protein OS=Cinnamomum micranthum f. kanehirae OX=337451 GN=CKAN_00063200 PE=4 SV=1	G	Carbohydrate transport and metabolism	beta-glucuronosyltransferase GlcAT14B-like protein [Cinnamomum micranthum f. kanehirae]
Phoebe_bournei_newGene_3387	--	--	Molecular Function: DNA binding (GO:0003677);; Cellular Component: nucleus (GO:0005634);; Biological Process: transcription, DNA-templated (GO:0006351);; Biological Process: leaf formation (GO:0010338);;	K09422|9.3e-150|nnu:104602458|K09422 transcription factor MYB, plant | (RefSeq) transcription factor AS1-like	[K]	Transcription	Myb-like DNA-binding domain	Transcription factor AS1 OS=Arabidopsis thaliana OX=3702 GN=AS1 PE=1 SV=1	transcription factor AS1-like OS=Nelumbo nucifera OX=4432 GN=LOC104602458 PE=4 SV=1	--	--	PREDICTED: transcription factor AS1-like [Nelumbo nucifera]
Phoebe_bournei_newGene_7224	--	--	Molecular Function: DNA binding (GO:0003677);;	K02995|6.0e-22|adu:107464504|K02995 small subunit ribosomal protein S8e | (RefSeq) 40S ribosomal protein S8	--	--	Protein of unknown function (DUF 659)	--	Zinc finger protein OS=Cinnamomum micranthum f. kanehirae OX=337451 GN=CKAN_01173100 PE=4 SV=1	S	Function unknown	zinc finger protein [Cinnamomum micranthum f. kanehirae]
Phoebe_bournei_newGene_11127	--	--	Biological Process: regulation of transcription, DNA-templated (GO:0006355);;	--	--	--	Protein of unknown function, DUF573	STOREKEEPER protein OS=Solanum tuberosum OX=4113 GN=STK PE=2 SV=1	STOREKEEPER-like protein OS=Cinnamomum micranthum f. kanehirae OX=337451 GN=CKAN_01732200 PE=3 SV=1	S	Function unknown	STOREKEEPER-like protein [Cinnamomum micranthum f. kanehirae]
Phoebe_bournei_newGene_2211	[C]	Energy production and conversion	Molecular Function: dihydrolipoyllysine-residue succinyltransferase activity (GO:0004149);; Biological Process: tricarboxylic acid cycle (GO:0006099);; Cellular Component: oxoglutarate dehydrogenase complex (GO:0045252);;	K00658|5.5e-72|nnu:104598431|K00658 2-oxoglutarate dehydrogenase E2 component (dihydrolipoamide succinyltransferase) [EC:2.3.1.61] | (RefSeq) dihydrolipoyllysine-residue succinyltransferase component of 2-oxoglutarate dehydrogenase complex 2, mitochondrial-like	[C]	Energy production and conversion	2-oxoacid dehydrogenases acyltransferase (catalytic domain)	Dihydrolipoyllysine-residue succinyltransferase component of 2-oxoglutarate dehydrogenase complex 2, mitochondrial OS=Arabidopsis thaliana OX=3702 GN=At4g26910 PE=1 SV=2	Dihydrolipoyllysine-residue succinyltransferase OS=Cinnamomum micranthum f. kanehirae OX=337451 GN=CKAN_01589300 PE=3 SV=1	C	Energy production and conversion	dihydrolipoyllysine-residue succinyltransferase component of 2-oxoglutarate dehydrogenase complex 2, mitochondrial-like protein [Cinnamomum micranthum f. kanehirae]
Phoebe_bournei_newGene_10023	--	--	Molecular Function: molecular_function (GO:0003674);; Molecular Function: catalytic activity (GO:0003824);; Molecular Function: ubiquitin-protein transferase activity (GO:0004842);; Molecular Function: binding (GO:0005488);; Molecular Function: protein binding (GO:0005515);; Cellular Component: cellular_component (GO:0005575);; Cellular Component: intracellular (GO:0005622);; Cellular Component: …	K10581|8.3e-144|egu:105042400|K10581 ubiquitin-conjugating enzyme E2 O [EC:2.3.2.24] | (RefSeq) putative ubiquitin-conjugating enzyme E2 38	[O]	Posttranslational modification, protein turnover, chaperones	Ubiquitin-conjugating enzyme	Probable ubiquitin-conjugating enzyme E2 25 OS=Arabidopsis thaliana OX=3702 GN=UBC25 PE=2 SV=1	Putative ubiquitin-conjugating enzyme E2 38 isoform X1 OS=Cinnamomum micranthum f. kanehirae OX=337451 GN=CKAN_02684800 PE=4 SV=1	O	Posttranslational modification, protein turnover, chaperones	putative ubiquitin-conjugating enzyme E2 38 isoform X1 [Cinnamomum micranthum f. kanehirae]
Phoebe_bournei_newGene_3185	--	--	Molecular Function: protein binding (GO:0005515);;	K00423|6.0e-06|egr:104451286|K00423 L-ascorbate oxidase [EC:1.10.3.3] | (RefSeq) LOW QUALITY PROTEIN: L-ascorbate oxidase	--	--	F-box domain	F-box/FBD/LRR-repeat protein At1g13570 OS=Arabidopsis thaliana OX=3702 GN=At1g13570 PE=2 SV=1	F-box/FBD/LRR-repeat protein OS=Cinnamomum micranthum f. kanehirae OX=337451 GN=CKAN_00996400 PE=4 SV=1	S	Function unknown	F-box/FBD/LRR-repeat protein [Cinnamomum micranthum f. kanehirae]
Phoebe_bournei_newGene_10461	--	--	--	K23222|3.0e-15|nsy:104242359|K23222 nuclease HARBI1 [EC:3.1.-.-] | (RefSeq) uncharacterized protein LOC104242359	[L]	Replication, recombination and repair	--	--	Putative nuclease HARBI1 isoform X1 OS=Cinnamomum micranthum f. kanehirae OX=337451 GN=CKAN_00015700 PE=3 SV=1	L	Replication, recombination and repair	putative nuclease HARBI1 isoform X1 [Cinnamomum micranthum f. kanehirae]
Phoebe_bournei_newGene_5311	--	--	--	--	--	--	Myb/SANT-like DNA-binding domain	--	L10-interacting MYB domain-containing protein OS=Cinnamomum micranthum f. kanehirae OX=337451 GN=CKAN_00576500 PE=4 SV=1	S	Function unknown	L10-interacting MYB domain-containing protein [Cinnamomum micranthum f. kanehirae]
Phoebe_bournei_newGene_2937	--	--	--	--	--	--	--	--	Putative myb/SANT-like domain-containing protein OS=Cinnamomum micranthum f. kanehirae OX=337451 GN=CKAN_00862100 PE=3 SV=1	--	--	putative myb/SANT-like domain-containing protein [Cinnamomum micranthum f. kanehirae]
Phoebe_bournei_newGene_5689	[Q]	Secondary metabolites biosynthesis, transport and catabolism	Molecular Function: metal ion binding (GO:0046872);; Molecular Function: dioxygenase activity (GO:0051213);;	K13229|1.4e-71|sita:101778204|K13229 2,4-dihydroxy-1,4-benzoxazin-3-one-glucoside dioxygenase [EC:1.14.11.59] | (RefSeq) DIBOA-glucoside dioxygenase BX6	[QR]	--	2OG-Fe(II) oxygenase superfamily	1-aminocyclopropane-1-carboxylate oxidase homolog 1 OS=Arabidopsis thaliana OX=3702 GN=At1g06620 PE=2 SV=1	Oxoglutarate/iron-dependent dioxygenase OS=Cinnamomum micranthum f. kanehirae OX=337451 GN=CKAN_00342900 PE=3 SV=1	Q	Secondary metabolites biosynthesis, transport and catabolism	Oxoglutarate/iron-dependent dioxygenase [Cinnamomum micranthum f. kanehirae]
Phoebe_bournei_newGene_1050	[G]	Carbohydrate transport and metabolism	Molecular Function: hydrolase activity, hydrolyzing O-glycosyl compounds (GO:0004553);; Biological Process: carbohydrate metabolic process (GO:0005975);;	K01188|2.8e-47|ats:109762067|K01188 beta-glucosidase [EC:3.2.1.21] | (RefSeq) LOC109762067; beta-glucosidase 31-like	[G]	Carbohydrate transport and metabolism	Glycosyl hydrolase family 1	Beta-glucosidase 31 OS=Oryza sativa subsp. japonica OX=39947 GN=BGLU31 PE=2 SV=1	Glycoside hydrolase OS=Cinnamomum micranthum f. kanehirae OX=337451 GN=CKAN_00261100 PE=3 SV=1	G	Carbohydrate transport and metabolism	Glycoside hydrolase [Cinnamomum micranthum f. kanehirae]
Phoebe_bournei_newGene_6616	--	--	Molecular Function: DNA-binding transcription factor activity (GO:0003700);; Cellular Component: nucleus (GO:0005634);; Cellular Component: host cell nucleus (GO:0042025);; Molecular Function: sequence-specific DNA binding (GO:0043565);;	K09419|6.3e-143|egu:105041353|K09419 heat shock transcription factor, other eukaryote | (RefSeq) heat stress transcription factor A-4b-like	[K]	Transcription	HSF-type DNA-binding	Heat stress transcription factor A-4b OS=Oryza sativa subsp. japonica OX=39947 GN=HSFA4B PE=2 SV=1	Heat shock factor HSF-type OS=Cinnamomum micranthum f. kanehirae OX=337451 GN=CKAN_02567200 PE=3 SV=1	K	Transcription	Heat shock factor HSF-type [Cinnamomum micranthum f. kanehirae]
Phoebe_bournei_newGene_3887	--	--	Molecular Function: antiporter activity (GO:0015297);; Cellular Component: integral component of membrane (GO:0016021);; Molecular Function: xenobiotic transmembrane transporter activity (GO:0042910);;	K03327|4.1e-40|egu:105047068|K03327 multidrug resistance protein, MATE family | (RefSeq) protein DETOXIFICATION 14-like isoform X1	[R]	General function prediction only	--	Protein DETOXIFICATION 13 OS=Arabidopsis thaliana OX=3702 GN=DTX13 PE=2 SV=1	Protein DETOXIFICATION OS=Cinnamomum micranthum f. kanehirae OX=337451 GN=CKAN_02319600 PE=3 SV=1	V	Defense mechanisms	Protein TRANSPARENT TESTA 12 [Cinnamomum micranthum f. kanehirae]
Phoebe_bournei_newGene_9299	--	--	--	--	--	--	--	--	Thioredoxin-like protein OS=Cinnamomum micranthum f. kanehirae OX=337451 GN=CKAN_01723600 PE=4 SV=1	--	--	Thioredoxin-like protein [Cinnamomum micranthum f. kanehirae]
Phoebe_bournei_newGene_9214	--	--	Molecular Function: molecular_function (GO:0003674);; Molecular Function: binding (GO:0005488);; Molecular Function: protein binding (GO:0005515);; Molecular Function: phospholipid binding (GO:0005543);; Cellular Component: cellular_component (GO:0005575);; Cellular Component: intracellular (GO:0005622);; Cellular Component: obsolete cell (GO:0005623);; Cellular Component: cytoplasm (GO:0005737);…	K12471|2.7e-121|nnu:104605283|K12471 epsin | (RefSeq) clathrin interactor EPSIN 2	[F]	Nucleotide transport and metabolism	ENTH domain	Clathrin interactor EPSIN 2 OS=Arabidopsis thaliana OX=3702 GN=EPSIN2 PE=1 SV=1	Clathrin interactor EPSIN 2-like protein OS=Cinnamomum micranthum f. kanehirae OX=337451 GN=CKAN_02604900 PE=4 SV=1	F	Nucleotide transport and metabolism	clathrin interactor EPSIN 2-like protein [Cinnamomum micranthum f. kanehirae]
Phoebe_bournei_newGene_3251	--	--	Molecular Function: cysteine-type peptidase activity (GO:0008234);;	K16292|3.4e-22|egu:105052979|K16292 KDEL-tailed cysteine endopeptidase [EC:3.4.22.-] | (RefSeq) LOW QUALITY PROTEIN: vignain	[O]	Posttranslational modification, protein turnover, chaperones	Papain family cysteine protease	Low-temperature-induced cysteine proteinase (Fragment) OS=Solanum lycopersicum OX=4081 PE=2 SV=1	Cysteine proteinase RD21A-like protein OS=Cinnamomum micranthum f. kanehirae OX=337451 GN=CKAN_01009900 PE=3 SV=1	O	Posttranslational modification, protein turnover, chaperones	cysteine proteinase RD21A-like protein [Cinnamomum micranthum f. kanehirae]
Phoebe_bournei_newGene_7516	--	--	--	--	--	--	--	--	Uncharacterized protein OS=Cinnamomum micranthum f. kanehirae OX=337451 GN=CKAN_00888200 PE=4 SV=1	--	--	hypothetical protein CKAN_00888200 [Cinnamomum micranthum f. kanehirae]
Phoebe_bournei_newGene_1567	--	--	Molecular Function: thiol-dependent ubiquitin-specific protease activity (GO:0004843);; Biological Process: ubiquitin-dependent protein catabolic process (GO:0006511);; Biological Process: protein deubiquitination (GO:0016579);;	K21343|2.6e-115|thj:104810942|K21343 ubiquitin carboxyl-terminal hydrolase 15 [EC:3.4.19.12] | (RefSeq) ubiquitin carboxyl-terminal hydrolase 8 isoform X1	[O]	Posttranslational modification, protein turnover, chaperones	Ubiquitin carboxyl-terminal hydrolase	Ubiquitin carboxyl-terminal hydrolase 5 OS=Arabidopsis thaliana OX=3702 GN=UBP5 PE=1 SV=2	Ubiquitin carboxyl-terminal hydrolase OS=Cinnamomum micranthum f. kanehirae OX=337451 GN=CKAN_01602800 PE=3 SV=1	O	Posttranslational modification, protein turnover, chaperones	Ubiquitin carboxyl-terminal hydrolases family 2 [Cinnamomum micranthum f. kanehirae]
Phoebe_bournei_newGene_1626	--	--	Molecular Function: protein serine/threonine kinase activity (GO:0004674);; Molecular Function: calcium ion binding (GO:0005509);; Molecular Function: ATP binding (GO:0005524);; Cellular Component: integral component of membrane (GO:0016021);; Molecular Function: polysaccharide binding (GO:0030247);;	--	--	--	--	Wall-associated receptor kinase-like 8 OS=Arabidopsis thaliana OX=3702 GN=WAKL8 PE=2 SV=1	WAK-like protein OS=Cinnamomum micranthum f. kanehirae OX=337451 GN=CKAN_00542900 PE=4 SV=1	T	Signal transduction mechanisms	WAK-like protein [Cinnamomum micranthum f. kanehirae]
Phoebe_bournei_newGene_10269	--	--	Molecular Function: protein kinase activity (GO:0004672);; Molecular Function: ATP binding (GO:0005524);; Cellular Component: integral component of membrane (GO:0016021);; Biological Process: recognition of pollen (GO:0048544);;	K13420|1.4e-08|mesc:110601988|K13420 LRR receptor-like serine/threonine-protein kinase FLS2 [EC:2.7.11.1] | (RefSeq) LRR receptor-like serine/threonine-protein kinase FLS2	--	--	D-mannose binding lectin	G-type lectin S-receptor-like serine/threonine-protein kinase At1g61550 OS=Arabidopsis thaliana OX=3702 GN=At1g61550 PE=2 SV=1	Receptor-like serine/threonine-protein kinase SD1-6 OS=Cinnamomum micranthum f. kanehirae OX=337451 GN=CKAN_01709600 PE=4 SV=1	T	Signal transduction mechanisms	receptor-like serine/threonine-protein kinase SD1-6 [Cinnamomum micranthum f. kanehirae]
Phoebe_bournei_newGene_1529	--	--	--	--	--	--	--	--	Bromodomain-containing protein 4-like protein isoform X3 OS=Cinnamomum micranthum f. kanehirae OX=337451 GN=CKAN_02660500 PE=4 SV=1	--	--	bromodomain-containing protein 4-like protein isoform X3 [Cinnamomum micranthum f. kanehirae]
Phoebe_bournei_newGene_1030	[T]	Signal transduction mechanisms	Molecular Function: voltage-gated chloride channel activity (GO:0005247);; Cellular Component: integral component of membrane (GO:0016021);;	K05016|5.8e-221|pda:103704786|K05016 chloride channel 7 | (RefSeq) chloride channel protein CLC-c-like	[P]	Inorganic ion transport and metabolism	Voltage gated chloride channel	Chloride channel protein CLC-c OS=Arabidopsis thaliana OX=3702 GN=CLC-C PE=1 SV=1	Chloride channel protein CLC-c-like protein OS=Cinnamomum micranthum f. kanehirae OX=337451 GN=CKAN_02192200 PE=3 SV=1	P	Inorganic ion transport and metabolism	chloride channel protein CLC-c-like protein [Cinnamomum micranthum f. kanehirae]
Phoebe_bournei_newGene_6739	--	--	Biological Process: reproduction (GO:0000003);; Cellular Component: lytic vacuole (GO:0000323);; Biological Process: embryonic axis specification (GO:0000578);; Biological Process: cell activation (GO:0001775);; Biological Process: immune effector process (GO:0002252);; Biological Process: cell activation involved in immune response (GO:0002263);; Biological Process: myeloid leukocyte activation …	K09533|0.0e+00|nnu:104592286|K09533 DnaJ homolog subfamily C member 13 | (RefSeq) dnaJ homolog subfamily C GRV2	[UO]	--	GYF domain 2	DnaJ homolog subfamily C GRV2 OS=Arabidopsis thaliana OX=3702 GN=GRV2 PE=1 SV=1	DnaJ subfamily C GRV2 isoform X1 OS=Cinnamomum micranthum f. kanehirae OX=337451 GN=CKAN_00597300 PE=4 SV=1	O	Posttranslational modification, protein turnover, chaperones	dnaJ subfamily C GRV2 isoform X1 [Cinnamomum micranthum f. kanehirae]
Phoebe_bournei_newGene_8374	--	--	--	K10839|1.0e-06|bdi:112271456|K10839 UV excision repair protein RAD23 | (RefSeq) ubiquitin receptor RAD23b-like isoform X1	--	--	--	--	Negative regulator of sporulation MDS3 OS=Cinnamomum micranthum f. kanehirae OX=337451 GN=CKAN_00366100 PE=4 SV=1	--	--	Negative regulator of sporulation MDS3 [Cinnamomum micranthum f. kanehirae]
Phoebe_bournei_newGene_2958	--	--	Biological Process: intracellular protein transport (GO:0006886);; Biological Process: vesicle-mediated transport (GO:0016192);;	K20183|6.9e-28|nnu:104598235|K20183 Vam6/Vps39-like protein vacuolar protein sorting-associated protein 39 | (RefSeq) vam6/Vps39-like protein	[U]	Intracellular trafficking, secretion, and vesicular transport	--	Vacuolar sorting protein 39 OS=Arabidopsis thaliana OX=3702 GN=VPS39 PE=1 SV=1	Vam6/Vps39-like protein OS=Cinnamomum micranthum f. kanehirae OX=337451 GN=CKAN_02345000 PE=4 SV=1	U	Intracellular trafficking, secretion, and vesicular transport	vam6/Vps39-like protein [Cinnamomum micranthum f. kanehirae]
Phoebe_bournei_newGene_10688	--	--	--	K13963|2.2e-28|vra:111242705|K13963 serpin B | (RefSeq) uncharacterized protein LOC111242705	--	--	--	--	Endo/exonuclease/phosphatase domain-containing protein OS=Cinnamomum micranthum f. kanehirae OX=337451 GN=CKAN_02468800 PE=4 SV=1	S	Function unknown	hypothetical protein CKAN_02468800 [Cinnamomum micranthum f. kanehirae]
Phoebe_bournei_newGene_1316	--	--	--	K10638|3.3e-42|psom:113308475|K10638 E3 ubiquitin-protein ligase UHRF1 [EC:2.3.2.27] | (RefSeq) uncharacterized protein LOC113308475	--	--	Development and cell death domain	--	Protein BONZAI 1-like protein OS=Cinnamomum micranthum f. kanehirae OX=337451 GN=CKAN_00273200 PE=4 SV=1	S	Function unknown	protein BONZAI 1-like protein [Cinnamomum micranthum f. kanehirae]
Phoebe_bournei_newGene_2365	--	--	Biological Process: defense response (GO:0006952);;	--	--	--	--	Protein NONRESPONDING TO OXYLIPINS 2, mitochondrial OS=Arabidopsis thaliana OX=3702 GN=NOXY2 PE=1 SV=2	Uncharacterized protein OS=Cinnamomum micranthum f. kanehirae OX=337451 GN=CKAN_01142400 PE=4 SV=1	S	Function unknown	hypothetical protein CKAN_01142400 [Cinnamomum micranthum f. kanehirae]
Phoebe_bournei_newGene_12146	[C]	Energy production and conversion	Molecular Function: FMN binding (GO:0010181);; Molecular Function: oxidoreductase activity (GO:0016491);;	K05894|7.4e-87|pmum:107880094|K05894 12-oxophytodienoic acid reductase [EC:1.3.1.42] | (RefSeq) 12-oxophytodienoate reductase 2-like	[CR]	--	NADH:flavin oxidoreductase / NADH oxidase family	12-oxophytodienoate reductase 2 OS=Arabidopsis thaliana OX=3702 GN=OPR2 PE=1 SV=2	12-oxophytodienoate reductase 1 OS=Cinnamomum micranthum f. kanehirae OX=337451 GN=CKAN_00724800 PE=3 SV=1	C	Energy production and conversion	12-oxophytodienoate reductase 1 [Cinnamomum micranthum f. kanehirae]
Phoebe_bournei_newGene_11844	[O]	Posttranslational modification, protein turnover, chaperones	Molecular Function: ATP binding (GO:0005524);; Cellular Component: cytoplasm (GO:0005737);; Molecular Function: peptidase activity (GO:0008233);; Biological Process: protein catabolic process (GO:0030163);;	K03066|6.0e-217|nnu:104592341|K03066 26S proteasome regulatory subunit T6 | (RefSeq) 26S protease regulatory subunit 8 homolog A-like	[O]	Posttranslational modification, protein turnover, chaperones	ATPase family associated with various cellular activities (AAA)	26S proteasome regulatory subunit 8 homolog A OS=Arabidopsis thaliana OX=3702 GN=RPT6A PE=1 SV=1	26S protease regulatory subunit 8 A OS=Cinnamomum micranthum f. kanehirae OX=337451 GN=CKAN_00059100 PE=3 SV=1	O	Posttranslational modification, protein turnover, chaperones	26S protease regulatory subunit 8 A [Cinnamomum micranthum f. kanehirae]
Phoebe_bournei_newGene_8485	--	--	--	--	--	--	--	--	Uncharacterized protein OS=Cephalotus follicularis OX=3775 GN=CFOL_v3_22014 PE=4 SV=1	--	--	hypothetical protein CFOL_v3_22014 [Cephalotus follicularis]
Phoebe_bournei_newGene_8514	--	--	Cellular Component: protein kinase CK2 complex (GO:0005956);; Molecular Function: kinase activity (GO:0016301);; Molecular Function: protein kinase regulator activity (GO:0019887);;	K03115|4.9e-129|nnu:104609835|K03115 casein kinase II subunit beta | (RefSeq) casein kinase II subunit beta-1	[TDK]	--	Casein kinase II regulatory subunit	Casein kinase II subunit beta-1 OS=Arabidopsis thaliana OX=3702 GN=CKB1 PE=1 SV=1	Casein kinase II subunit beta OS=Cinnamomum micranthum f. kanehirae OX=337451 GN=CKAN_01878900 PE=3 SV=1	--	--	casein kinase II subunit beta isoform X1 [Cinnamomum micranthum f. kanehirae]
Phoebe_bournei_newGene_2369	[O]	Posttranslational modification, protein turnover, chaperones	Molecular Function: threonine-type endopeptidase activity (GO:0004298);; Cellular Component: nucleus (GO:0005634);; Cellular Component: cytoplasm (GO:0005737);; Cellular Component: proteasome core complex (GO:0005839);; Biological Process: proteolysis involved in cellular protein catabolic process (GO:0051603);;	K02738|2.1e-118|dcr:108205072|K02738 20S proteasome subunit beta 1 [EC:3.4.25.1] | (RefSeq) proteasome subunit beta type-6	[O]	Posttranslational modification, protein turnover, chaperones	Proteasome subunit	Proteasome subunit beta type-6 OS=Arabidopsis thaliana OX=3702 GN=PBA1 PE=1 SV=2	Proteasome subunit beta OS=Cinnamomum micranthum f. kanehirae OX=337451 GN=CKAN_01140200 PE=3 SV=1	O	Posttranslational modification, protein turnover, chaperones	proteasome subunit beta type-6 [Cinnamomum micranthum f. kanehirae]
Phoebe_bournei_newGene_6109	--	--	Molecular Function: calcium ion binding (GO:0005509);; Cellular Component: endoplasmic reticulum (GO:0005783);; Biological Process: protein folding (GO:0006457);; Cellular Component: integral component of membrane (GO:0016021);; Molecular Function: unfolded protein binding (GO:0051082);;	K08054|2.1e-177|atr:18434560|K08054 calnexin | (RefSeq) calnexin homolog	[O]	Posttranslational modification, protein turnover, chaperones	Calreticulin family	Calnexin homolog OS=Glycine max OX=3847 PE=2 SV=1	Calnexin 1-like protein OS=Cinnamomum micranthum f. kanehirae OX=337451 GN=CKAN_02003500 PE=3 SV=1	O	Posttranslational modification, protein turnover, chaperones	calnexin 1-like protein [Cinnamomum micranthum f. kanehirae]
Phoebe_bournei_newGene_12101	--	--	--	K03100|9.2e-93|pop:18104955|K03100 signal peptidase I [EC:3.4.21.89] | (RefSeq) uncharacterized protein LOC18104955	--	--	--	--	Putative thylakoidal processing peptidase 2, chloroplastic OS=Cinnamomum micranthum f. kanehirae OX=337451 GN=CKAN_01191900 PE=4 SV=1	--	--	putative thylakoidal processing peptidase 2, chloroplastic [Cinnamomum micranthum f. kanehirae]
Phoebe_bournei_newGene_3724	--	--	Molecular Function: hydrolase activity, hydrolyzing O-glycosyl compounds (GO:0004553);; Biological Process: carbohydrate metabolic process (GO:0005975);;	--	--	--	--	--	Cellulase OS=Cinnamomum micranthum f. kanehirae OX=337451 GN=CKAN_02421500 PE=3 SV=1	--	--	ataxia telangiectasia mutated family protein [Cinnamomum micranthum f. kanehirae]
Phoebe_bournei_newGene_4520	--	--	Molecular Function: DNA binding (GO:0003677);;	K09422|1.7e-85|egu:105041231|K09422 transcription factor MYB, plant | (RefSeq) transcription factor MYB21	[K]	Transcription	Myb-like DNA-binding domain	Transcription factor MYB62 OS=Arabidopsis thaliana OX=3702 GN=MYB62 PE=2 SV=1	Myb-related protein 305-like protein isoform X1 OS=Cinnamomum micranthum f. kanehirae OX=337451 GN=CKAN_02314400 PE=4 SV=1	--	--	myb-related protein 305-like protein isoform X1 [Cinnamomum micranthum f. kanehirae]
Phoebe_bournei_newGene_11682	--	--	--	--	--	--	PPR repeat family	--	Uncharacterized protein OS=Cinnamomum micranthum f. kanehirae OX=337451 GN=CKAN_01398100 PE=4 SV=1	--	--	hypothetical protein CKAN_01398100 [Cinnamomum micranthum f. kanehirae]
Phoebe_bournei_newGene_5512	--	--	Molecular Function: protein binding (GO:0005515);;	K12818|2.7e-30|mtr:MTR_0267s0070|K12818 ATP-dependent RNA helicase DHX8/PRP22 [EC:3.6.4.13] | (RefSeq) NB-ARC domain disease resistance protein, putative	--	--	Leucine rich repeat	--	Putative disease resistance RPP13-like protein 1 OS=Cinnamomum micranthum f. kanehirae OX=337451 GN=CKAN_01358300 PE=4 SV=1	T	Signal transduction mechanisms	putative disease resistance RPP13-like protein 1 [Cinnamomum micranthum f. kanehirae]
Phoebe_bournei_newGene_5243	--	--	Molecular Function: nucleic acid binding (GO:0003676);; Molecular Function: zinc ion binding (GO:0008270);; Biological Process: DNA integration (GO:0015074);; Molecular Function: hydrolase activity (GO:0016787);;	K15601|7.8e-93|psom:113331285|K15601 [histone H3]-dimethyl-L-lysine9 demethylase [EC:1.14.11.65] | (RefSeq) lysine-specific demethylase JMJ25-like	[R]	General function prediction only	Integrase core domain	Retrovirus-related Pol polyprotein from transposon RE1 OS=Arabidopsis thaliana OX=3702 GN=RE1 PE=2 SV=1	Retrovirus-related Pol polyprotein from transposon TNT 1-94 OS=Apostasia shenzhenica OX=1088818 GN=AXF42_Ash010082 PE=4 SV=1	L	Replication, recombination and repair	Retrovirus-related Pol polyprotein from transposon TNT 1-94 [Apostasia shenzhenica]
Phoebe_bournei_newGene_9724	--	--	--	--	--	--	--	--	--	--	--	Ribonuclease h domain, partial [Thalictrum thalictroides]
Phoebe_bournei_newGene_9293	[R]	General function prediction only	Biological Process: defense response (GO:0006952);; Molecular Function: ADP binding (GO:0043531);;	K13457|2.6e-97|vvi:100854803|K13457 disease resistance protein RPM1 | (RefSeq) disease resistance protein RPM1	[T]	Signal transduction mechanisms	NB-ARC domain	Disease resistance protein RPP13 OS=Arabidopsis thaliana OX=3702 GN=RPP13 PE=2 SV=2	Putative disease resistance protein OS=Cinnamomum micranthum f. kanehirae OX=337451 GN=CKAN_02642400 PE=4 SV=1	T	Signal transduction mechanisms	putative disease resistance protein [Cinnamomum micranthum f. kanehirae]
Phoebe_bournei_newGene_2444	--	--	Molecular Function: isomerase activity (GO:0016853);;	--	--	--	--	--	Peptidyl-prolyl cis-trans isomerase FKBP53 OS=Cinnamomum micranthum f. kanehirae OX=337451 GN=CKAN_02056000 PE=4 SV=1	--	--	peptidyl-prolyl cis-trans isomerase FKBP53 [Cinnamomum micranthum f. kanehirae]
Phoebe_bournei_newGene_12253	--	--	--	K19525|2.2e-19|nnu:104604129|K19525 vacuolar protein sorting-associated protein 13A/C | (RefSeq) uncharacterized LOC104604129	[U]	Intracellular trafficking, secretion, and vesicular transport	--	--	Peroxin/Ferlin domain-containing protein OS=Cinnamomum micranthum f. kanehirae OX=337451 GN=CKAN_00215700 PE=3 SV=1	U	Intracellular trafficking, secretion, and vesicular transport	Peroxin/Ferlin domain-containing protein [Cinnamomum micranthum f. kanehirae]
Phoebe_bournei_newGene_7577	--	--	Biological Process: root development (GO:0048364);; Molecular Function: triphosphatase activity (GO:0050355);;	--	--	--	CYTH domain	Triphosphate tunnel metalloenzyme 3 OS=Arabidopsis thaliana OX=3702 GN=TTM3 PE=1 SV=1	Triphosphate tunel metalloenzyme 3-like protein isoform X1 OS=Cinnamomum micranthum f. kanehirae OX=337451 GN=CKAN_00404800 PE=4 SV=1	S	Function unknown	triphosphate tunel metalloenzyme 3-like protein isoform X1 [Cinnamomum micranthum f. kanehirae]
Phoebe_bournei_newGene_10564	[R]	General function prediction only	Molecular Function: metalloendopeptidase activity (GO:0004222);; Cellular Component: mitochondrion (GO:0005739);; Biological Process: protein processing involved in protein targeting to mitochondrion (GO:0006627);; Molecular Function: metal ion binding (GO:0046872);;	K01412|2.0e-84|nnu:104588252|K01412 mitochondrial-processing peptidase subunit alpha [EC:3.4.24.64] | (RefSeq) mitochondrial-processing peptidase subunit alpha-like	[O]	Posttranslational modification, protein turnover, chaperones	Peptidase M16 inactive domain	Mitochondrial-processing peptidase subunit alpha OS=Solanum tuberosum OX=4113 GN=MPP PE=1 SV=1	Alpha-MPP OS=Cinnamomum micranthum f. kanehirae OX=337451 GN=CKAN_00187300 PE=3 SV=1	O	Posttranslational modification, protein turnover, chaperones	mitochondrial-processing peptidase subunit alpha-like protein [Cinnamomum micranthum f. kanehirae]
Phoebe_bournei_newGene_8981	--	--	Molecular Function: protein binding (GO:0005515);; Cellular Component: cellular_component (GO:0005575);; Cellular Component: intracellular (GO:0005622);; Cellular Component: obsolete cell (GO:0005623);; Cellular Component: nucleus (GO:0005634);; Cellular Component: cytoplasm (GO:0005737);; Cellular Component: cytosol (GO:0005829);; Biological Process: biological_process (GO:0008150);; Biological …	--	--	--	F-box-like	F-box protein SKIP14 OS=Arabidopsis thaliana OX=3702 GN=SKIP14 PE=1 SV=1	F-box protein SKIP14 OS=Cinnamomum micranthum f. kanehirae OX=337451 GN=CKAN_02632600 PE=4 SV=1	S	Function unknown	F-box protein SKIP14 [Cinnamomum micranthum f. kanehirae]
Phoebe_bournei_newGene_11913	--	--	Biological Process: defense response (GO:0006952);; Molecular Function: ADP binding (GO:0043531);;	K15078|3.7e-21|tcc:18614561|K15078 structure-specific endonuclease subunit SLX1 [EC:3.6.1.-] | (RefSeq) putative disease resistance protein RGA3	--	--	--	Putative disease resistance protein RGA1 OS=Solanum bulbocastanum OX=147425 GN=RGA1 PE=2 SV=2	Putative disease resistance protein RGA3 OS=Cinnamomum micranthum f. kanehirae OX=337451 GN=CKAN_00083500 PE=4 SV=1	T	Signal transduction mechanisms	putative disease resistance protein RGA3 [Cinnamomum micranthum f. kanehirae]
Phoebe_bournei_newGene_8622	--	--	Biological Process: retrograde vesicle-mediated transport, Golgi to endoplasmic reticulum (GO:0006890);; Cellular Component: integral component of membrane (GO:0016021);;	--	[S]	Function unknown	Eukaryotic integral membrane protein (DUF1751)	Rhomboid-like protein 19 OS=Arabidopsis thaliana OX=3702 GN=RBL19 PE=2 SV=1	Rhomboid-like protein 19 OS=Cinnamomum micranthum f. kanehirae OX=337451 GN=CKAN_00524500 PE=4 SV=1	S	Function unknown	rhomboid-like protein 19 [Cinnamomum micranthum f. kanehirae]
Phoebe_bournei_newGene_3008	--	--	Molecular Function: molecular_function (GO:0003674);; Molecular Function: catalytic activity (GO:0003824);; Molecular Function: glutamate-ammonia ligase activity (GO:0004356);; Molecular Function: binding (GO:0005488);; Molecular Function: copper ion binding (GO:0005507);; Molecular Function: protein binding (GO:0005515);; Molecular Function: ATP binding (GO:0005524);; Cellular Component: cellula…	K01915|6.7e-33|dzi:111313621|K01915 glutamine synthetase [EC:6.3.1.2] | (RefSeq) glutamine synthetase nodule isozyme-like	[E]	Amino acid transport and metabolism	--	Glutamine synthetase nodule isozyme OS=Vigna aconitifolia OX=3918 PE=2 SV=1	Glutamine synthetase OS=Nyssa sinensis OX=561372 GN=F0562_024006 PE=3 SV=1	E	Amino acid transport and metabolism	glutamine synthetase nodule isozyme-like [Durio zibethinus]
Phoebe_bournei_newGene_5911	--	--	Molecular Function: protein binding (GO:0005515);;	K11843|2.8e-10|aip:110267024|K11843 ubiquitin carboxyl-terminal hydrolase 14 [EC:3.4.19.12] | (RefSeq) FBD-associated F-box protein At4g10400-like	--	--	FBD	F-box/FBD/LRR-repeat protein At1g13570 OS=Arabidopsis thaliana OX=3702 GN=At1g13570 PE=2 SV=1	F-box/RNI-like superfamily protein isoform 1 OS=Cinnamomum micranthum f. kanehirae OX=337451 GN=CKAN_00987300 PE=4 SV=1	S	Function unknown	F-box/RNI-like superfamily protein isoform 1 [Cinnamomum micranthum f. kanehirae]
Phoebe_bournei_newGene_8879	--	--	--	--	--	--	--	--	Uncharacterized protein OS=Apostasia shenzhenica OX=1088818 GN=AXF42_Ash008547 PE=4 SV=1	--	--	hypothetical protein AXF42_Ash008547 [Apostasia shenzhenica]
[truncated: 3,917 more rows]

## Sheet: table s5
Table S5. Total DEGs among three tissues
DEG set	Total DEGs	up-regulated DEGs	down-regulated DEGs
HW vs. SW	250	40	210
[truncated: 2 more rows]
